# Supplementary material for: Bulked Segregant Analysis and Association Analysis Identified the Polymorphisms Related to the Intermuscular Bones in Common Carp (Cyprinus carpio)
Source: MDPI journal article supplement (doi:10.3390/biology11030477), 2022-03-21
Supplement: s1 [file s1]

## Supplementary Figures

**Figure S1. The photos of the studied common carp strains.**

**(a)**

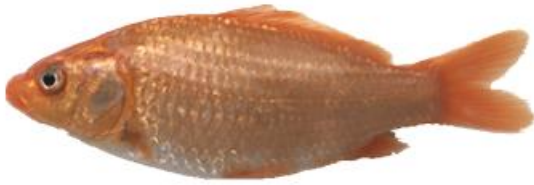

**(b)**

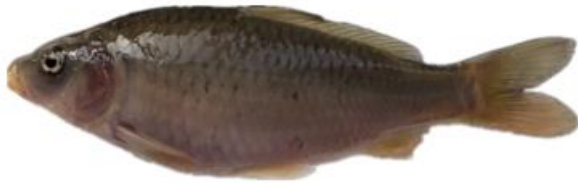

**(c)**

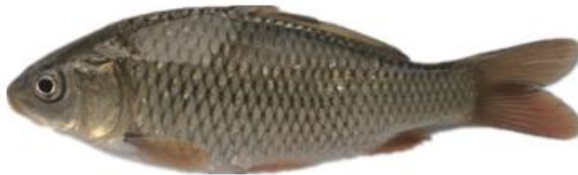

(a) var. Hebao (HB); (b) var. Hehua (HH); (c) var. Wenqing (WQ).

**Figure S2. Illustration of the seven types of inter-muscular bone observed in common carp.**

(a) I shape (not-fork type)

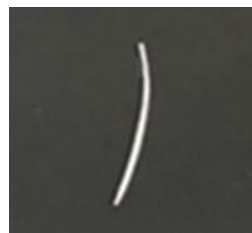

(b) 丂 shape (one-end-unequal-bi-fork type, OEUBF type)

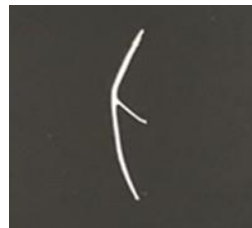

(c) Y shape (one-end-equal-bi-fork type, Y shape)

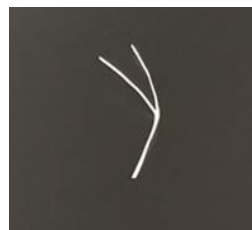

(d) one-end-multi-fork shape (OEMF shape)

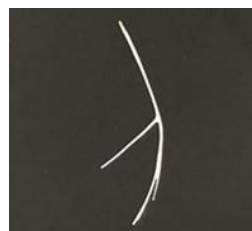

(e) two-end-bi-fork type (TEBF shape)

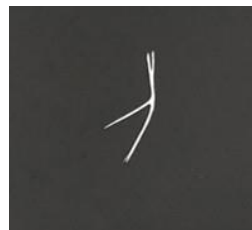

(f) two-end-multi-fork type (TEMF shape)

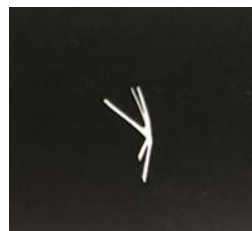

(g) tree-branch type (TB shape)

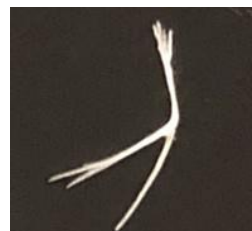

**Figure S3. The correlation matrix among the numbers of IB, en-IB, and ep-IB.**

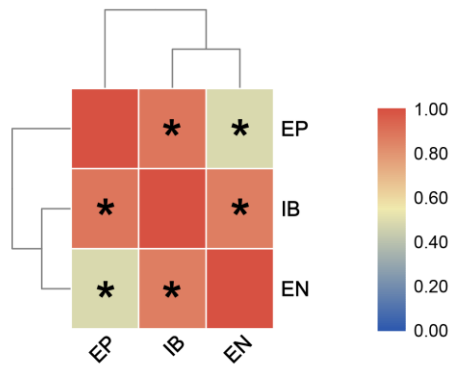

The asterisk indicates the significant correlation between two traits.

**Figure S4. Illustration of the IBs in the six sequenced groups of common carp types.**

(a). HH individual having the fewest IBs. (b). HH individual having the most IBs. (c). HB individual having the fewest IBs. (d). HB individual having the most IBs. (e). WQ individual having the fewest IBs. (f). WQ individual having the most IBs.

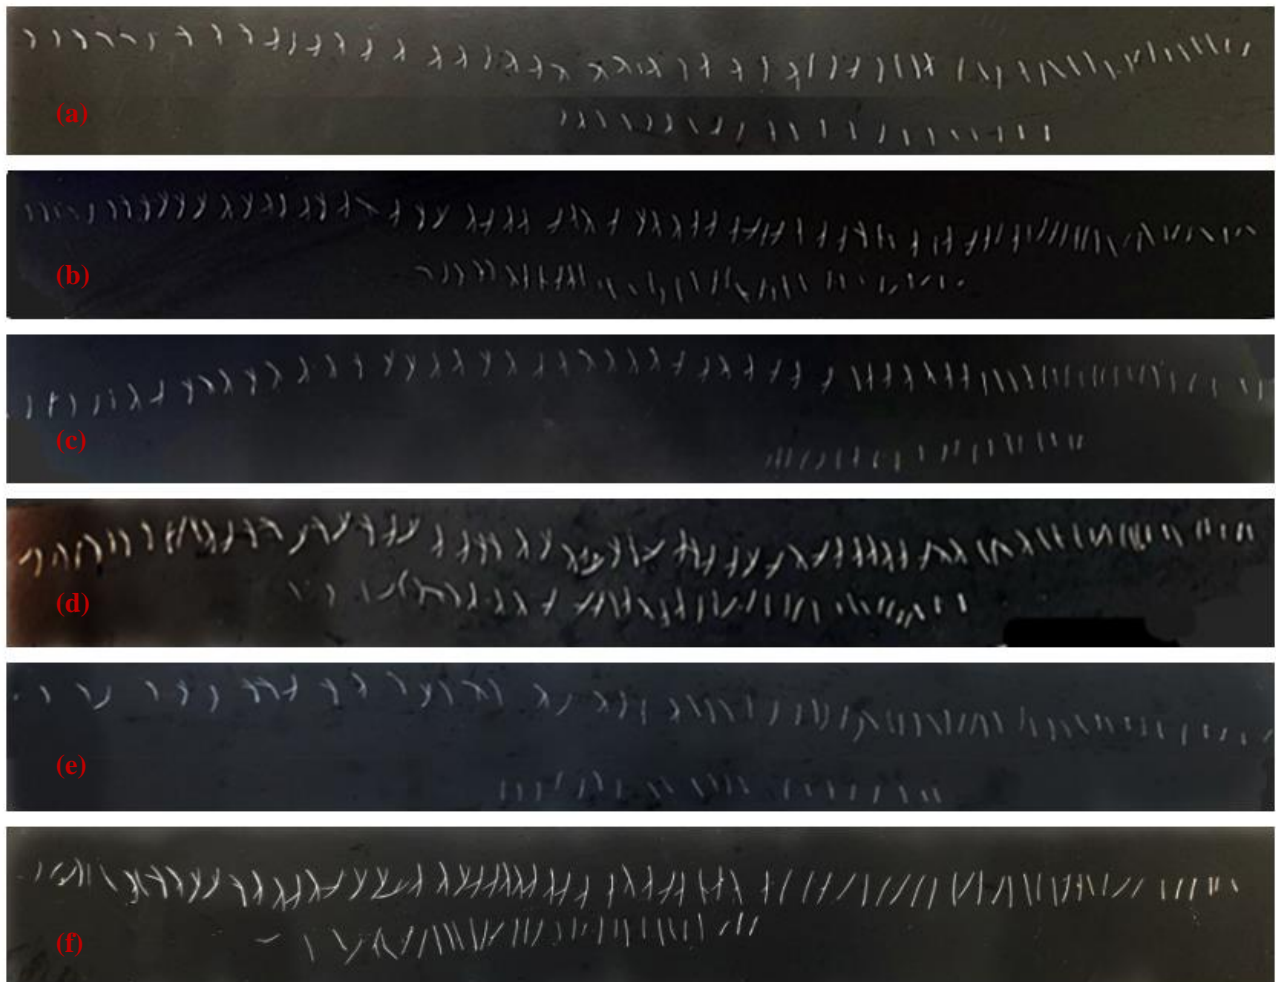

**Figure S5. The Venn diagram of identified SNPs among three strains.**

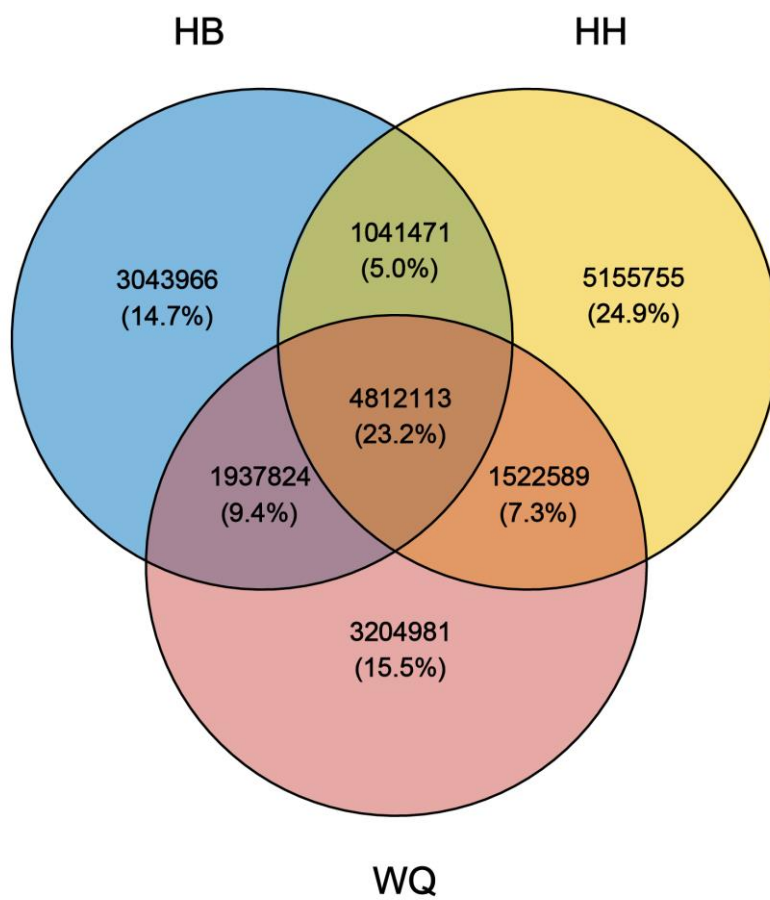

**Figure S6. The genomic and exonic distribution of the basic SNP set.**

**(a)**

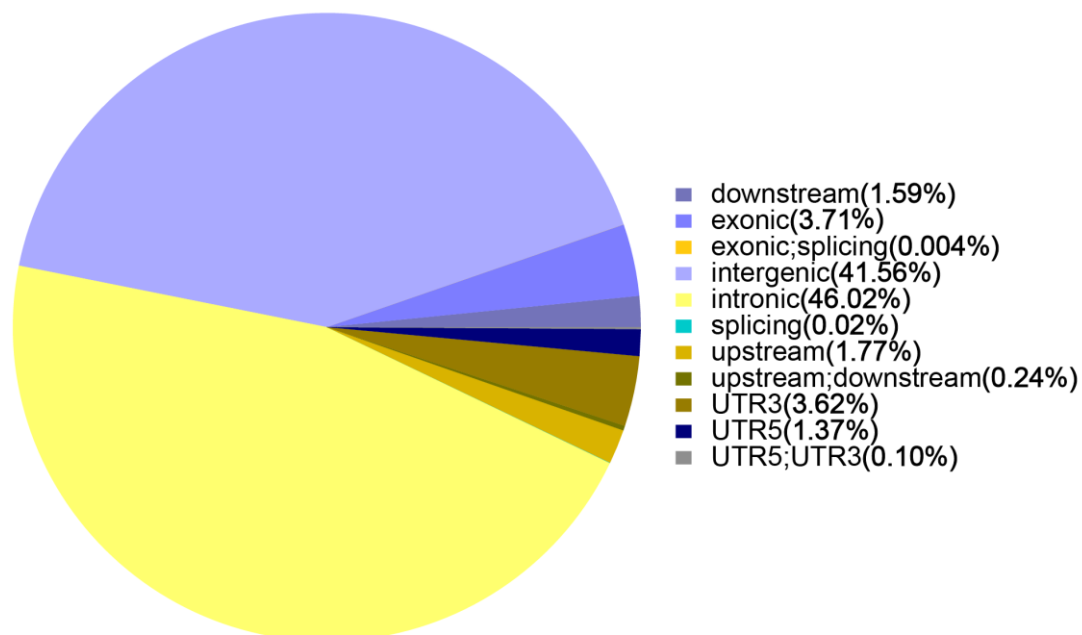

**(b)**

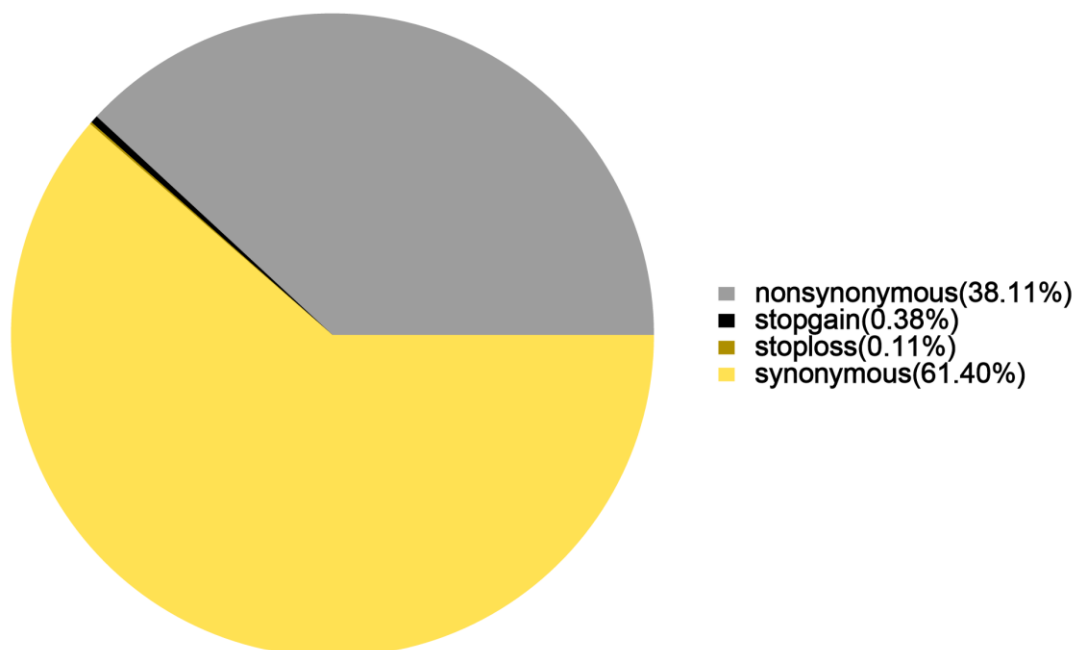

The figures (a) and (b) show the genomic location distribution and functional annotation of the basic SNP set.

**Figure S7. The genomic and exonic distribution of the core SNP set.**

**(a)**

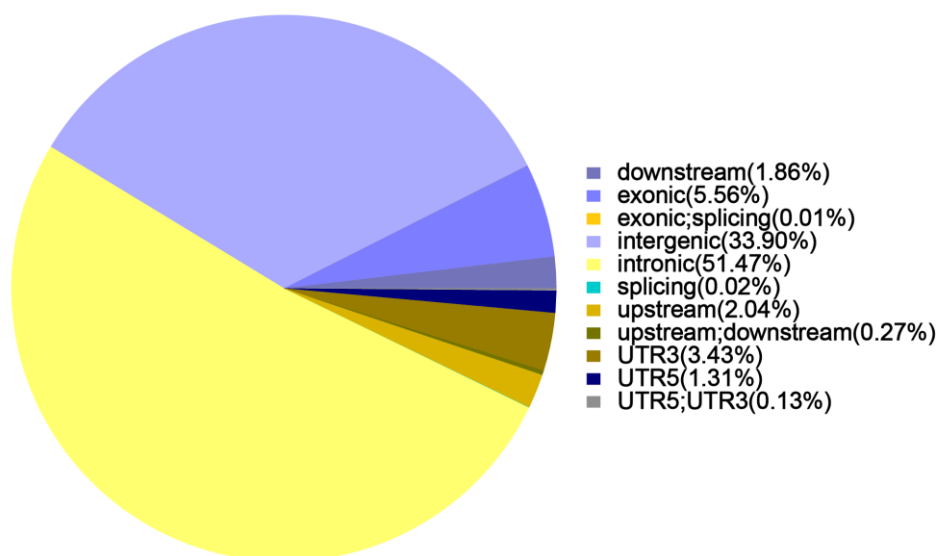

**(b)**

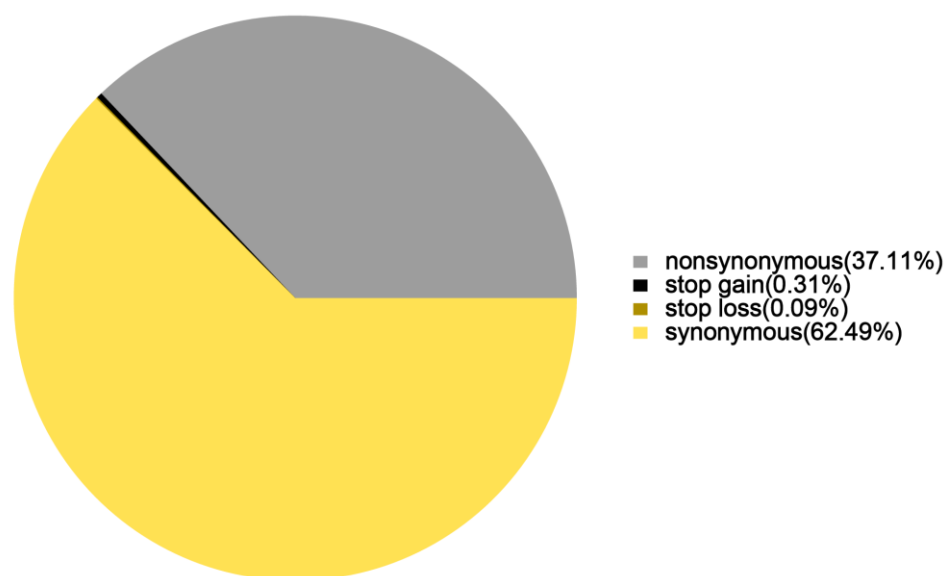

The figures (a) and (b) show the genomic location distribution and functional annotation of the core SNP set.

**Figure S8. The genomic distributions of the identified SNPs in each strain.**

**(a) HB**

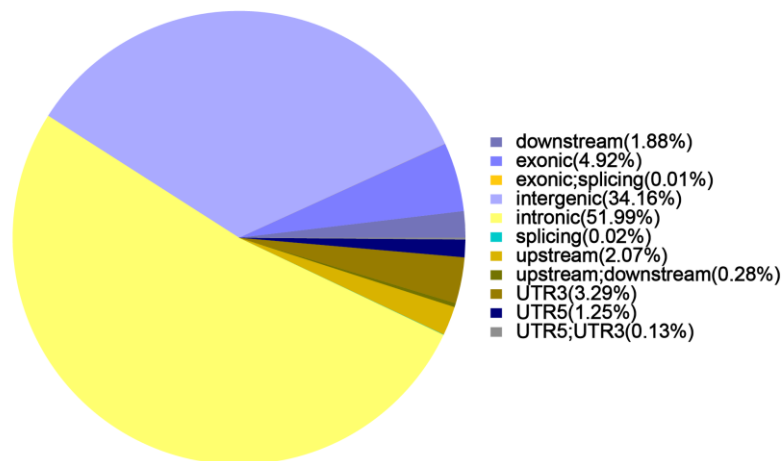

**(b) HH**

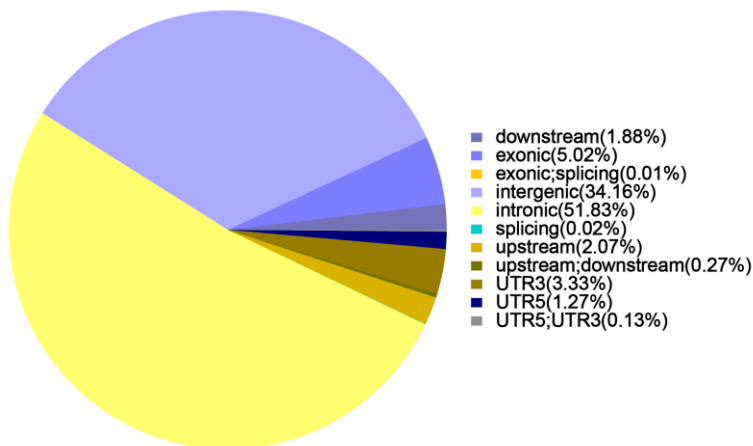

**(c) WQ**

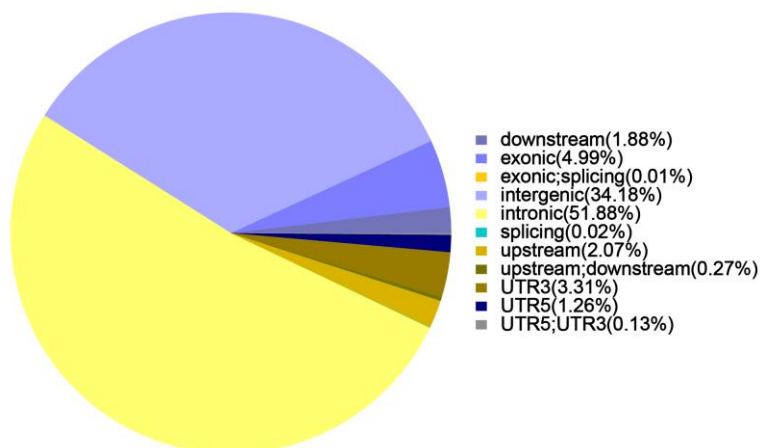

The figure (a), (b), and (c) show the genomic location distributions of SNPs in HB, HH, and WQ strain, respectively.



**Figure S9. The function effects of the exonic SNPs in each strain.**

**(a) HB**

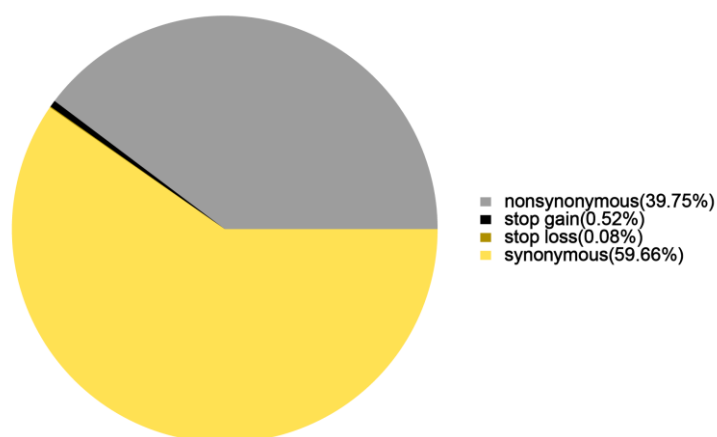

**(b) HH**

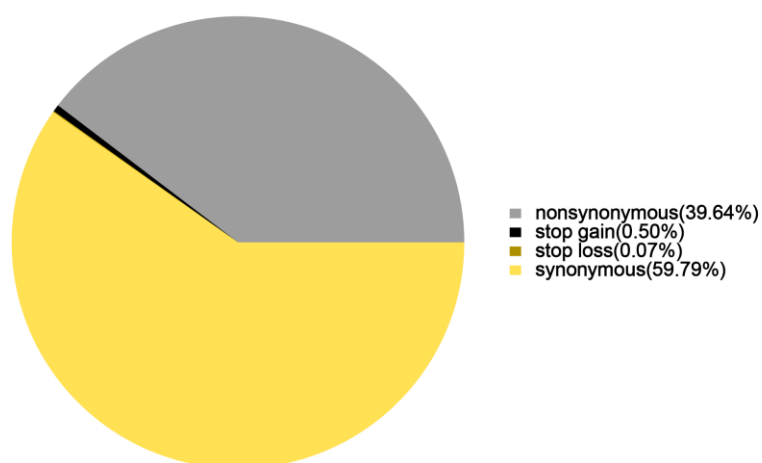

**(c) WQ**

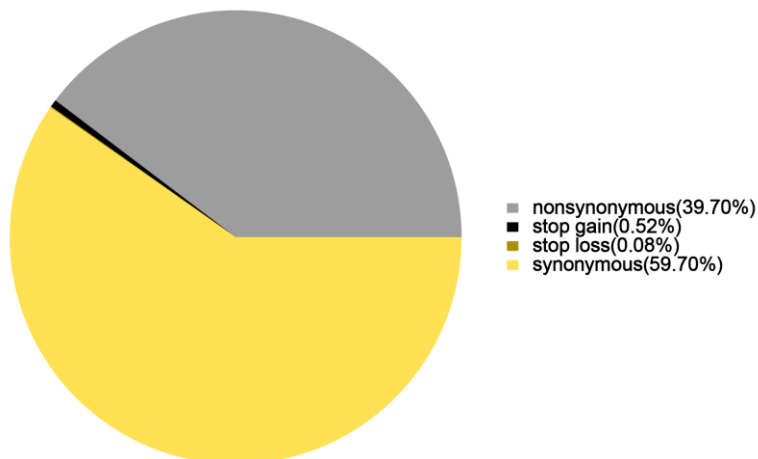

The figures (a), (b), and (c) show the functional annotations of the SNPs in the HB, HH, and WQ strain, respectively.

**Figure S10. The genomic distributions of the identified BSA-SNPs in three strains.**

**(a) HB**

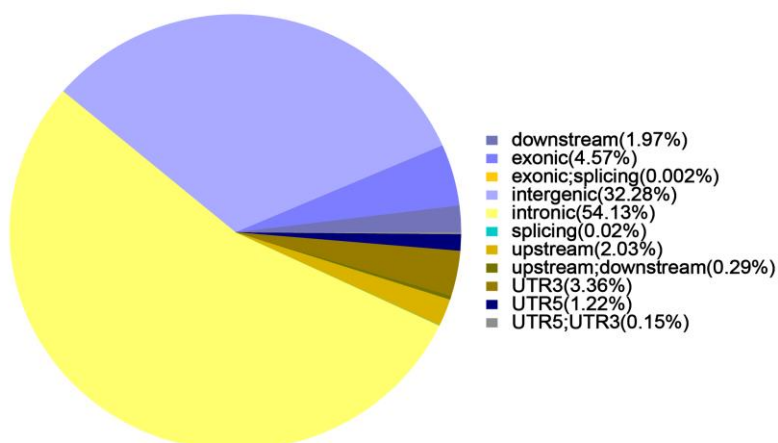

**(b) HH**

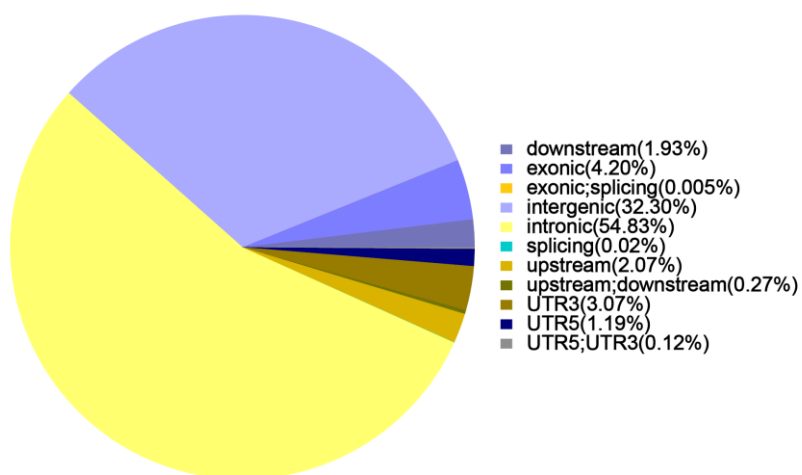

**(c) WQ**

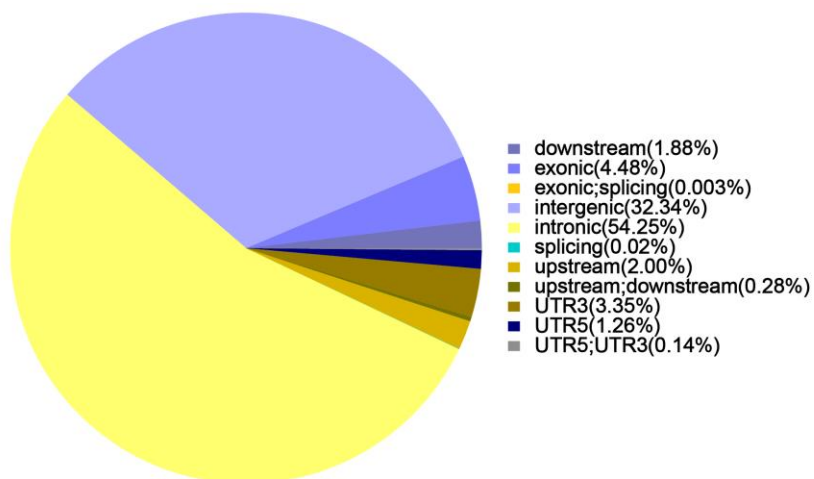

**Figure S11. The function effects of the exonic BSA-SNPs in three strains.**

**(a) HB**

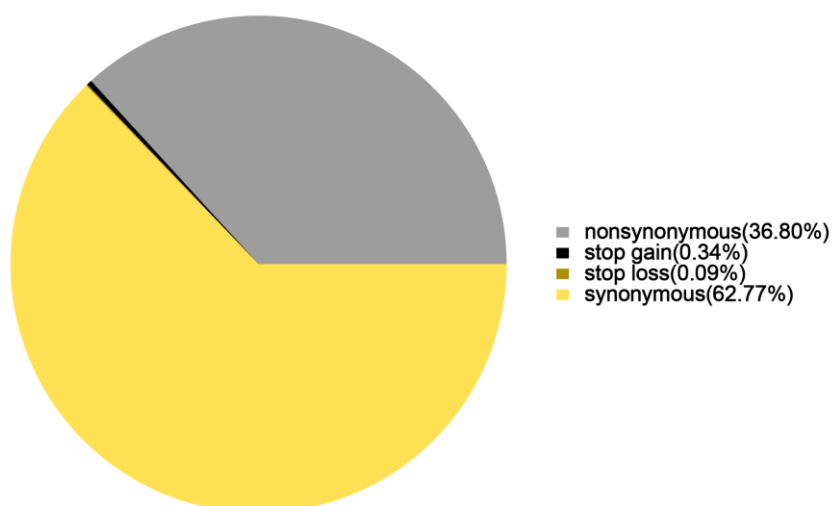

**(b) HH**

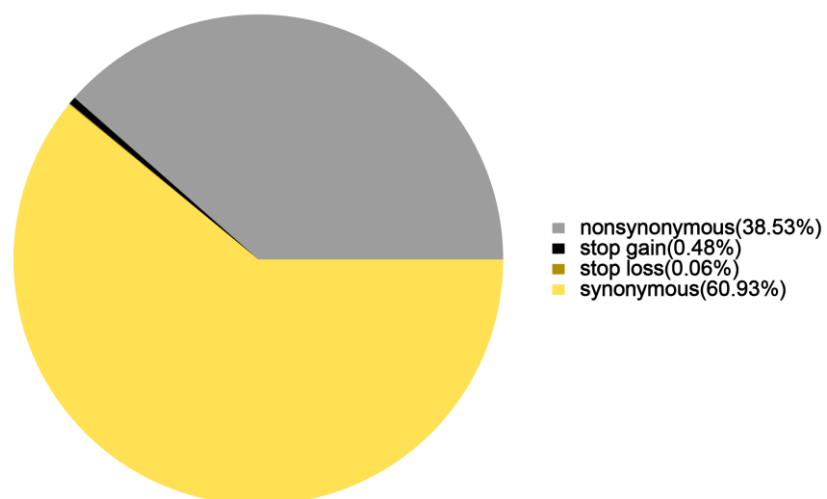

**(c) WQ**

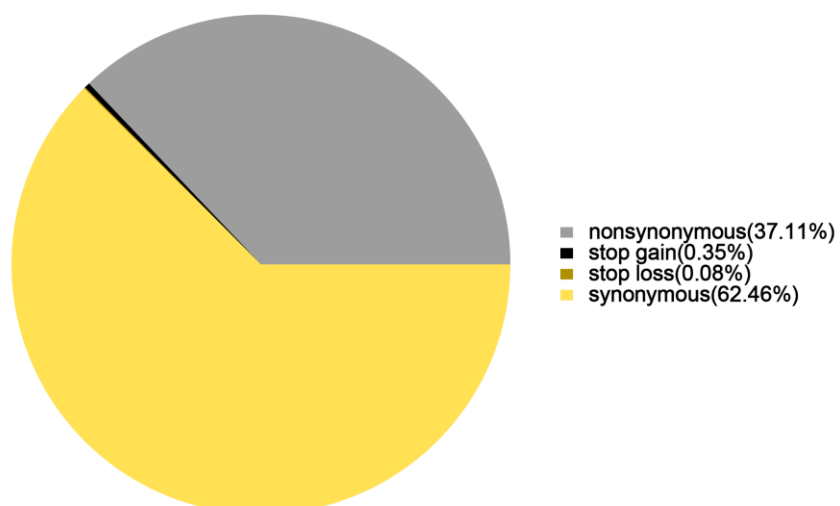

**Figure S12. The Venn diagram of the shared BSA-genes in three strains.**

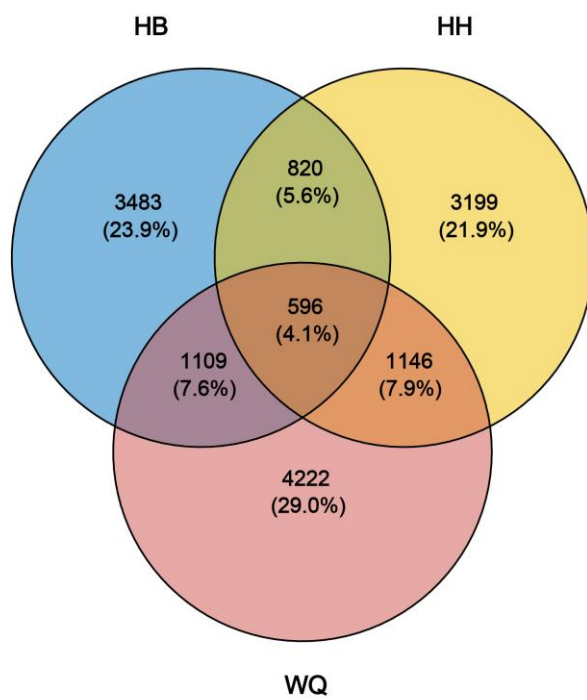

**Figure S13.** The Venn diagram of the shared GO terms enriched by the genes with the deleterious exonic BSA-SNPs in three strains.

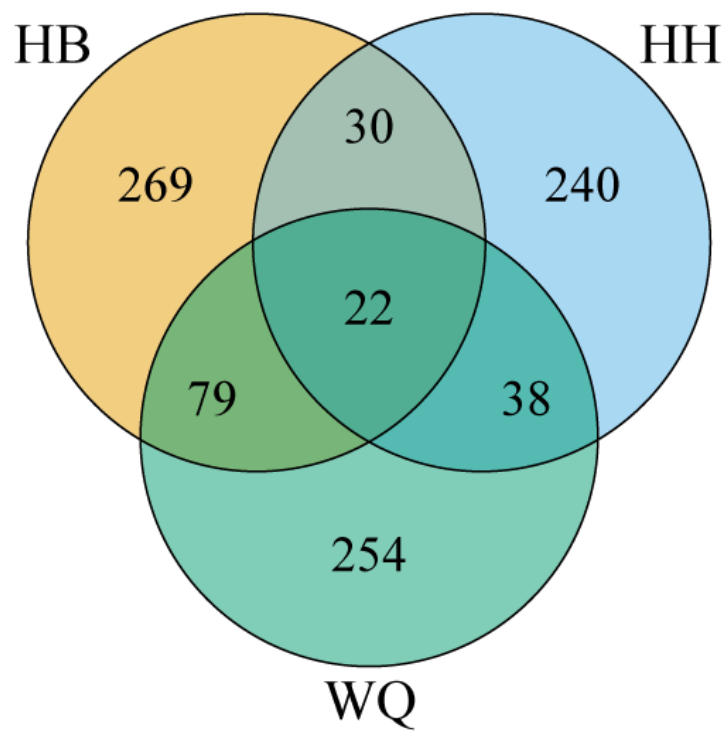

**Figure S14. The Venn diagram of the shared BSA-SNPs in three strains.**

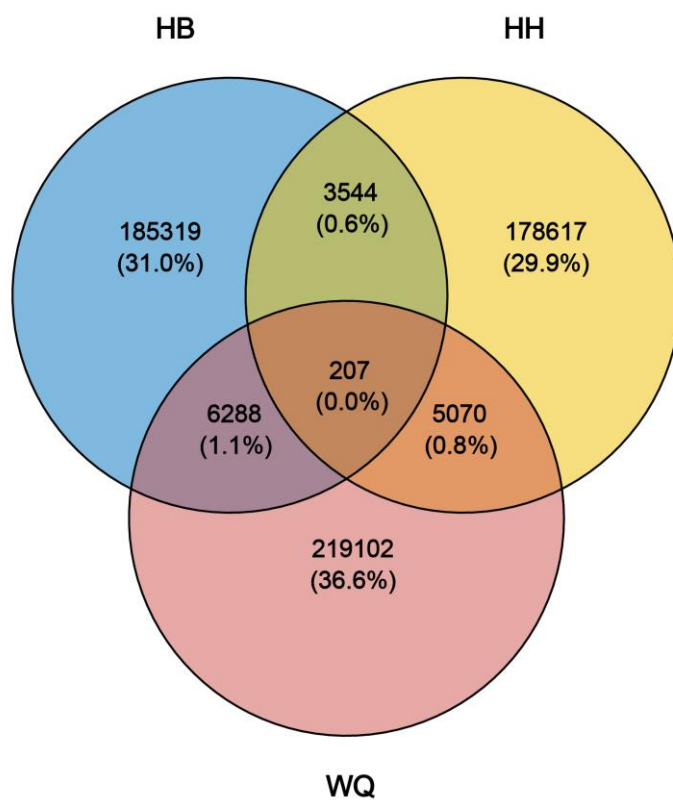

**Figure S15. PCA plots detected with the SNPs in three regions, respectively.**

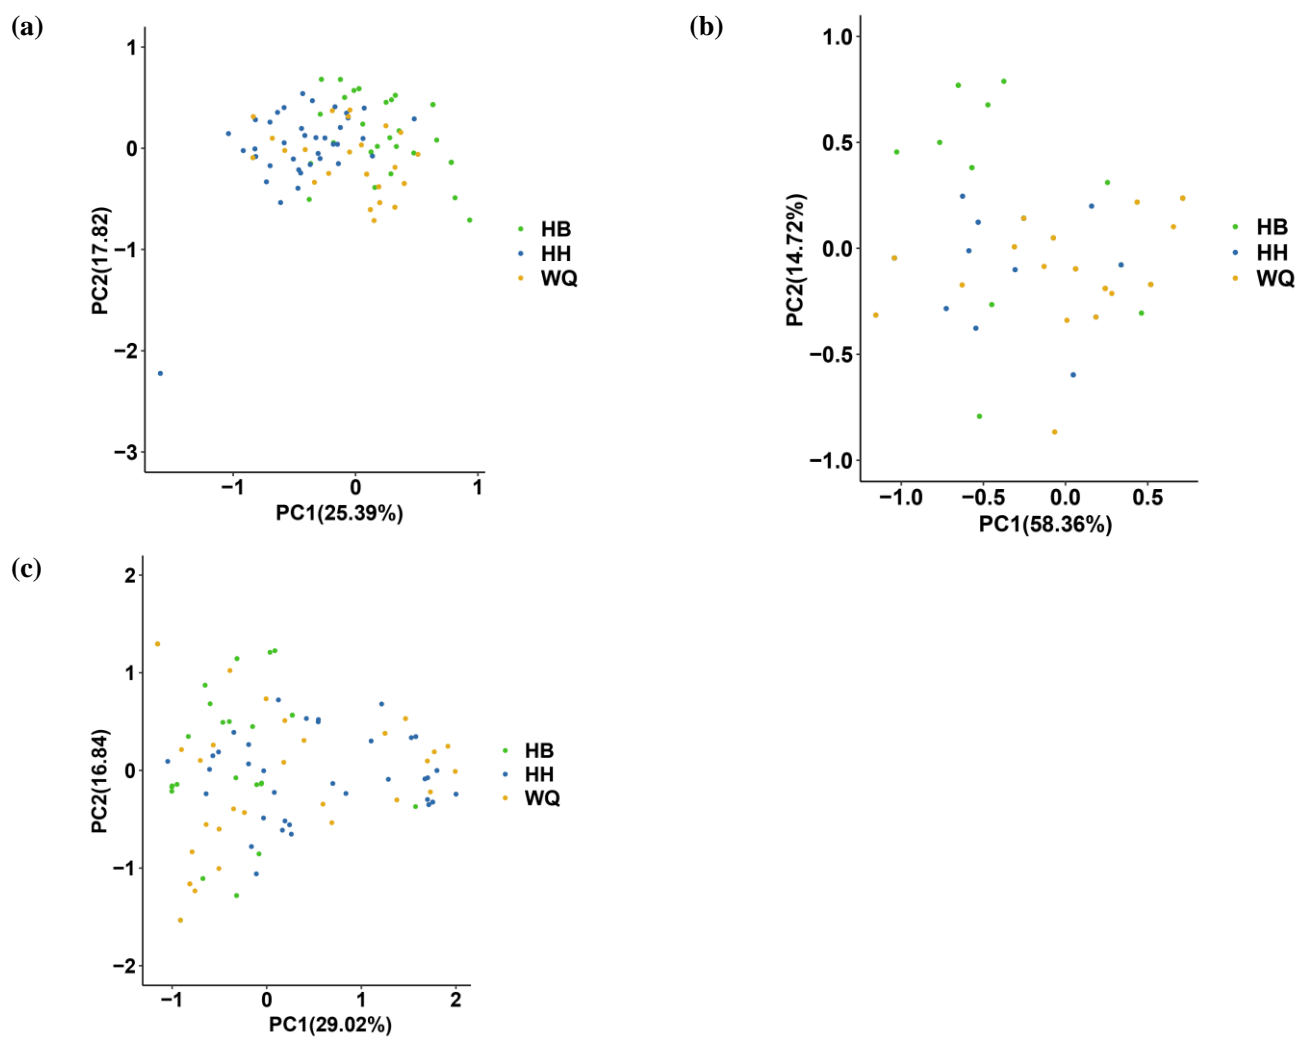

**Figure S16. Population structures detected with the SNPs in three regions, respectively.**

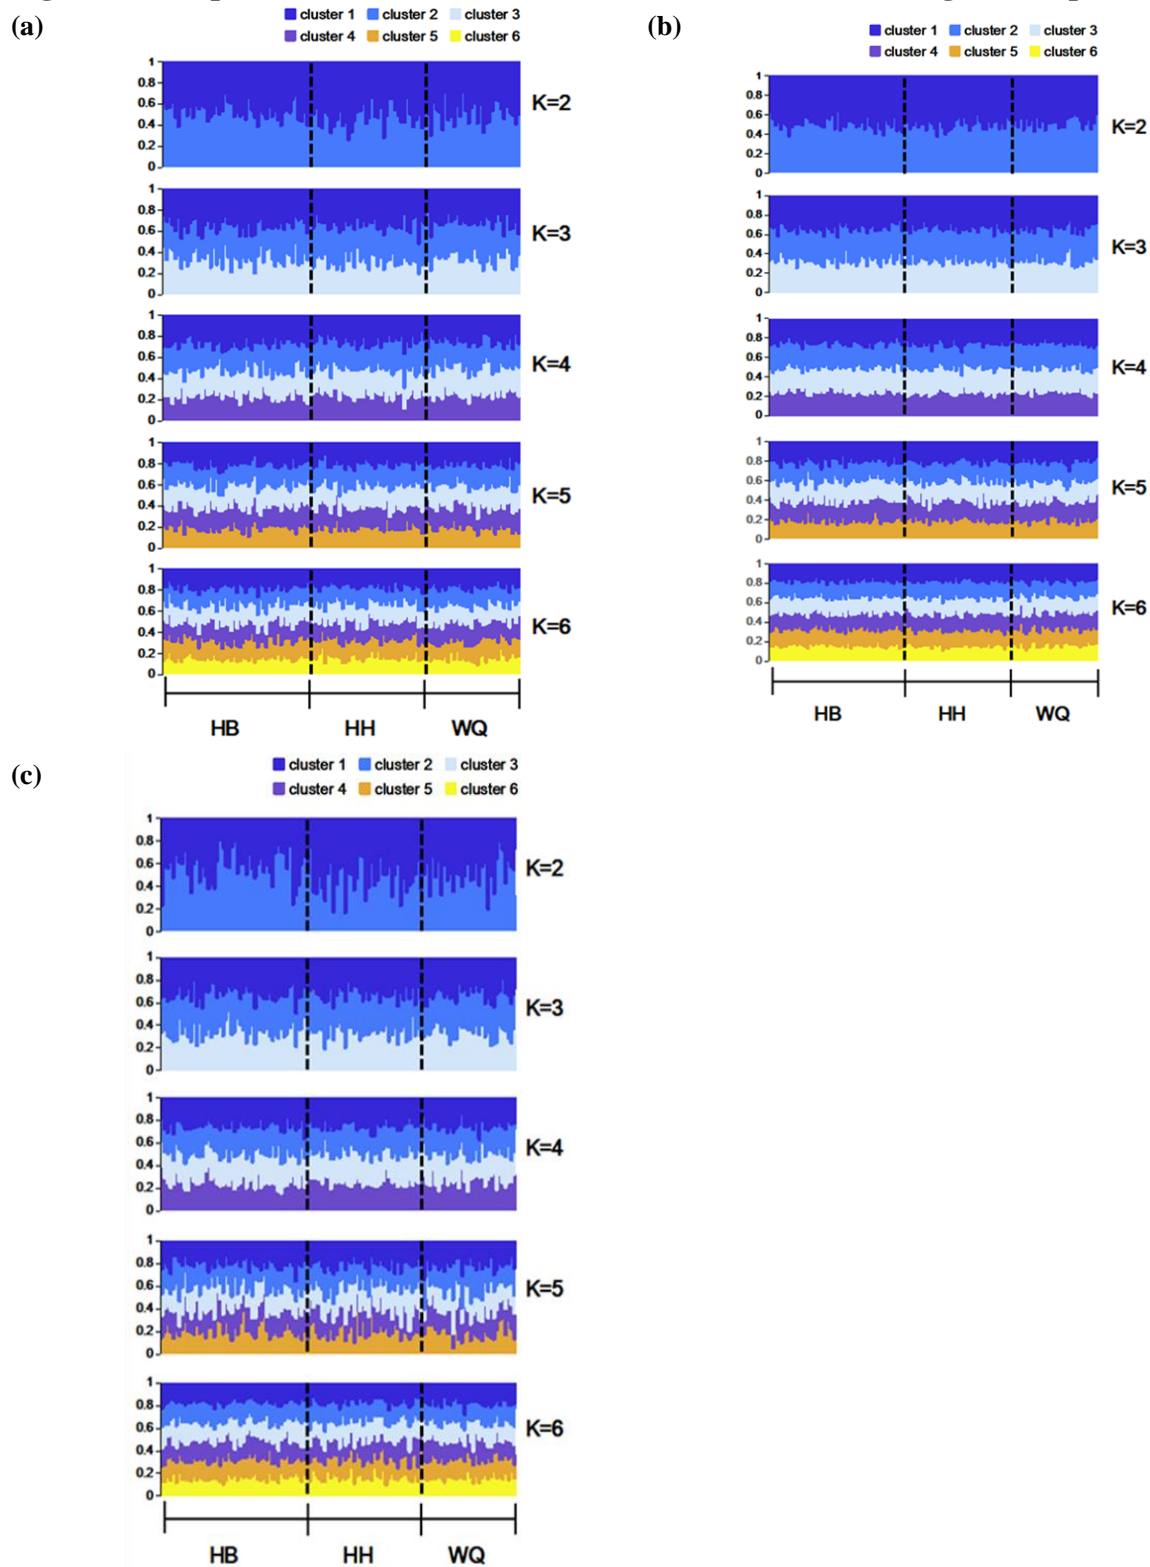



**Figure S17. The Manhattan plots showing the SNPs and their associated IB numbers.**

**(a) two SNPs associated with the number of total IBs, identified with both GLM and ANOVA.**

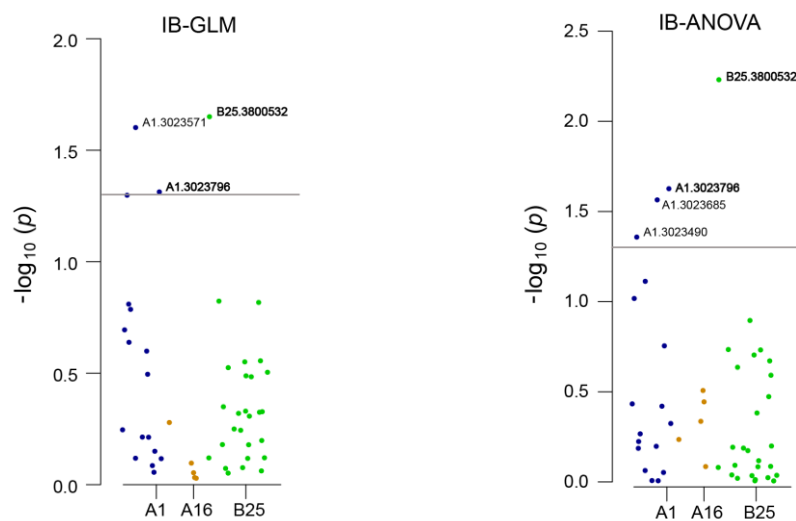

**(b) one SNP associated with the number of en-IBs, identified with both GLM and ANOVA.**

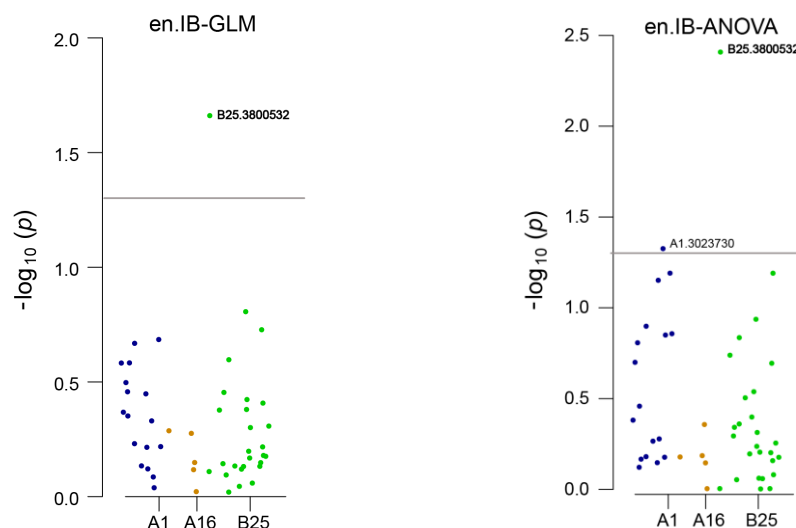

**(c) four SNPs associated with the number of en-I IBs, identified with both GLM and ANOVA.**

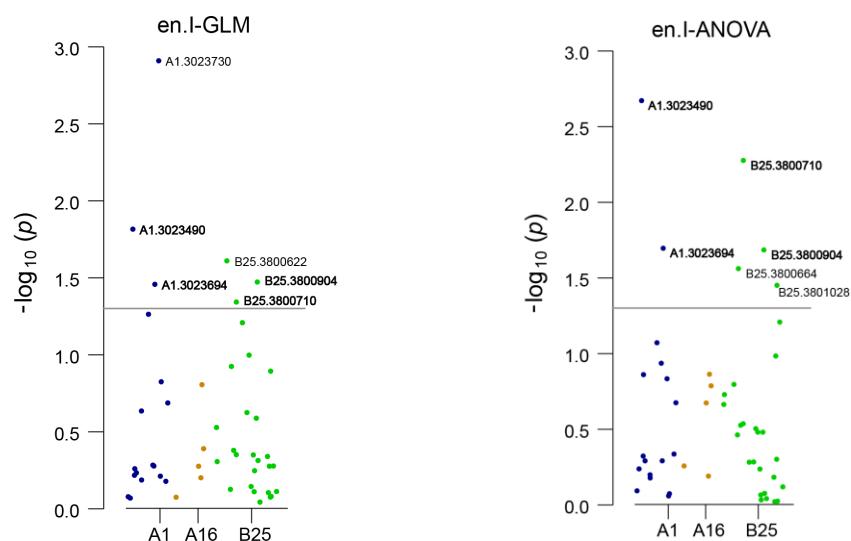

(d) four SNPs associated with the number of en-OEMF IBs, identified with both GLM and ANOVA.

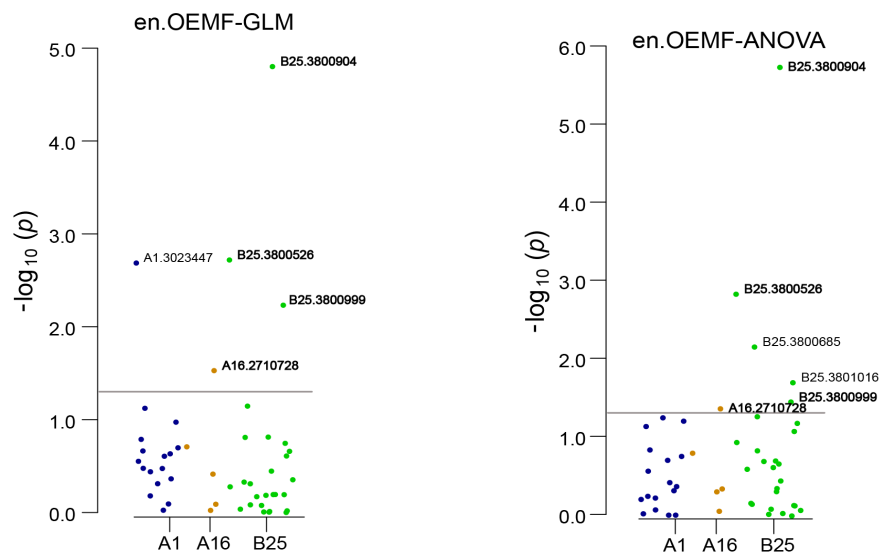

(e) two SNPs associated with the number of en-OEUB IBs, identified with both GLM and ANOVA.

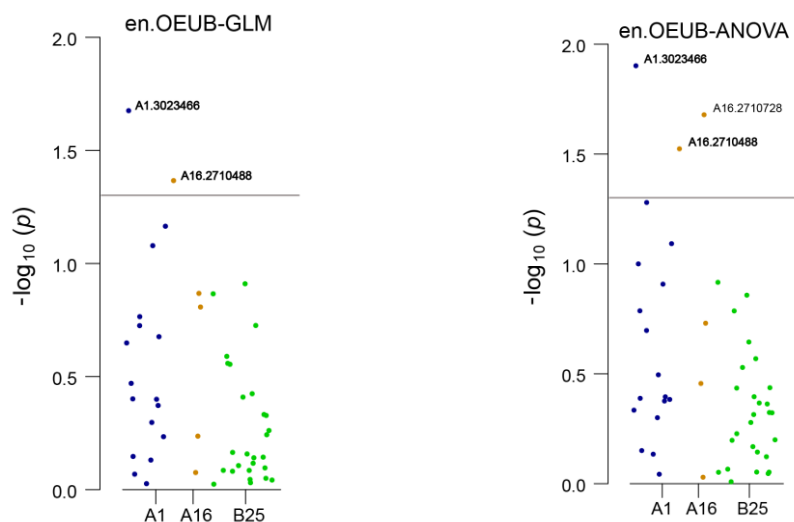

(f) six SNPs associated with the number of en-TEBF IBs, identified with both GLM and ANOVA.

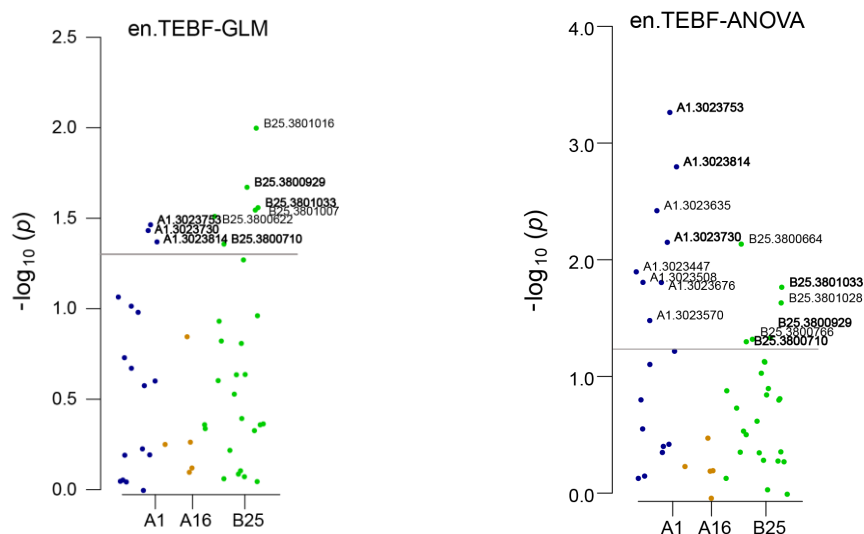

(g) four SNPs associated with the number of en-TEMF IBs, identified with both GLM and ANOVA.

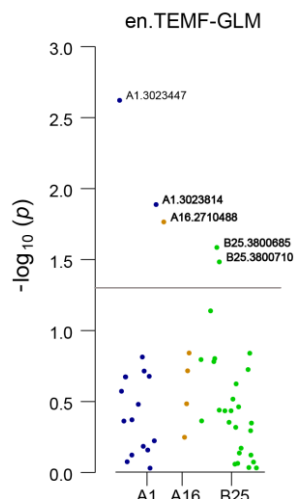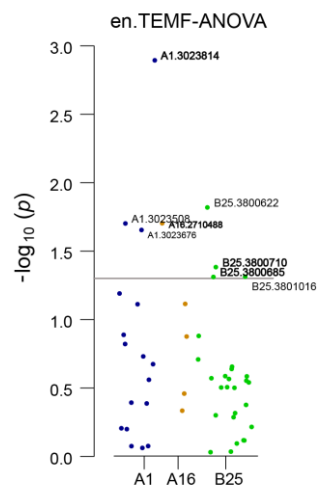

(h) three SNPs associated with the number of en-Y IBs, identified with both GLM and ANOVA.

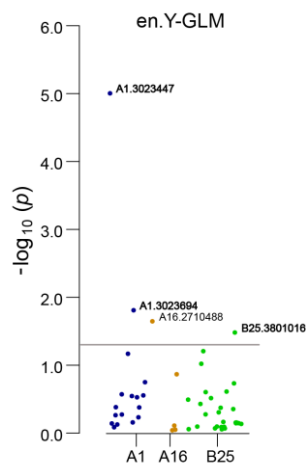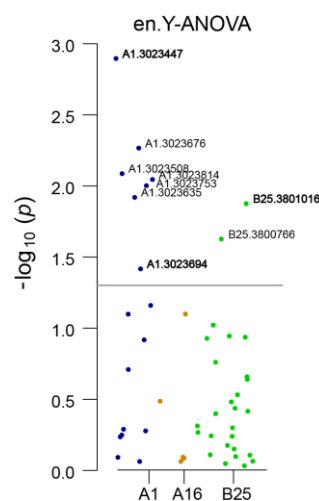

(i) one SNP associated with the number of ep-I IBs, identified with both GLM and ANOVA.

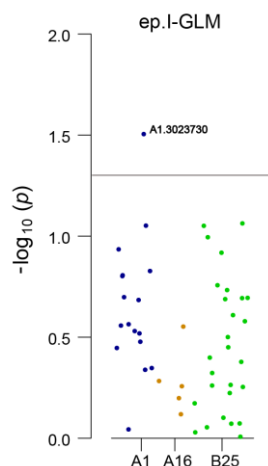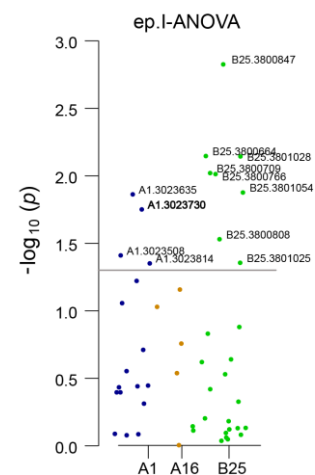

(j) one SNP associated with the number of ep-OEMF IBs, identified with both GLM and ANOVA.

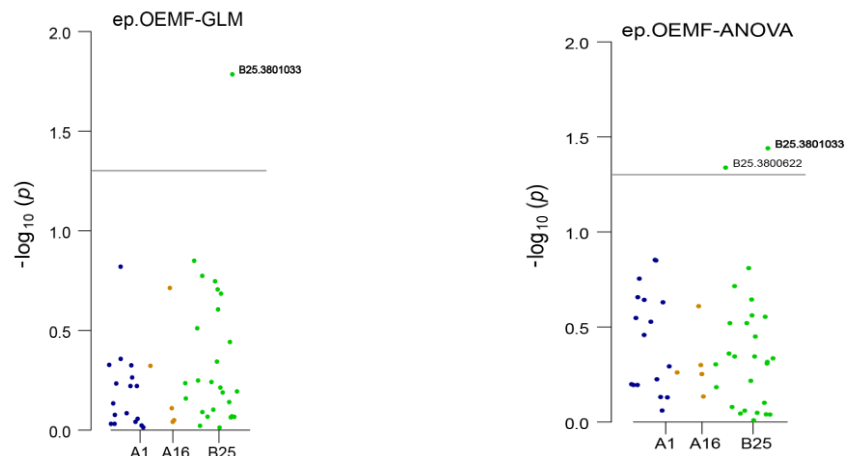

(k) two SNPs associated with the number of ep-TEMF IBs, identified with both GLM and ANOVA.

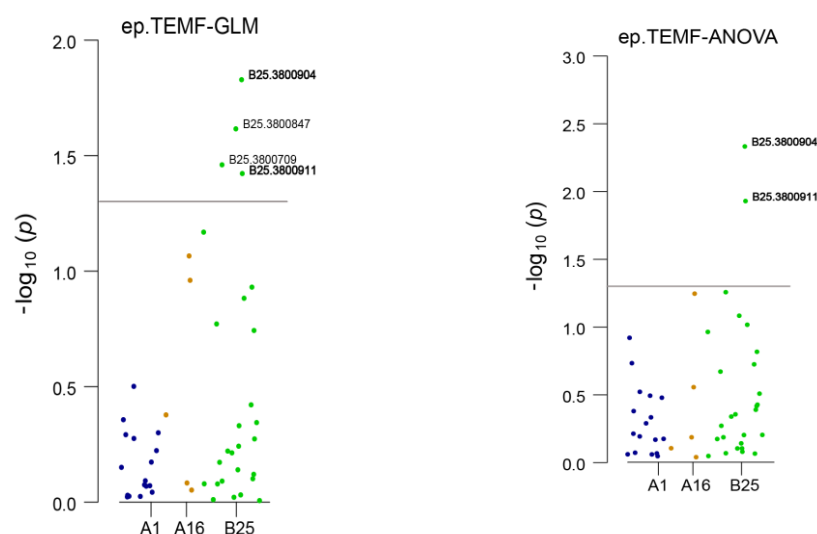

(l) two SNPs associated with the number of ep-Y IBs, identified with both GLM and ANOVA.

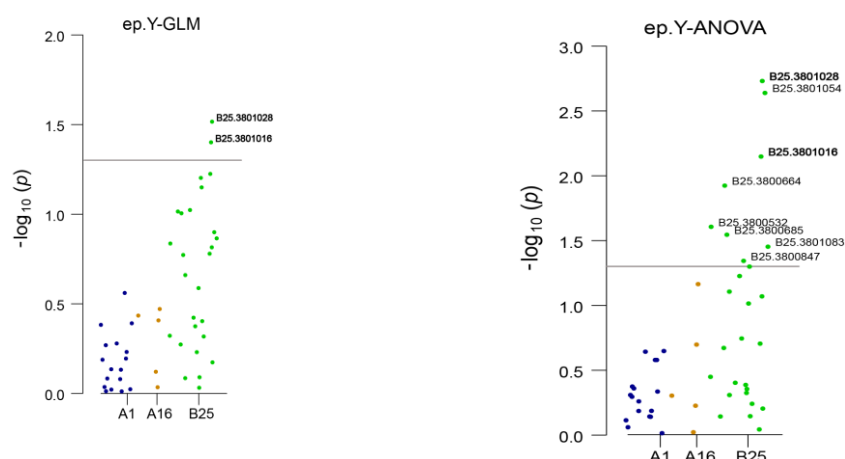

The line represents the p value of 0.05. The SNPs above the line are significantly associated with one IB number. If these SNPs are marked with the bold fonts, they are identified with both GLM and ANOVA methods. The SNPs marked with the normal fonts and located above the line are identified with only one method. The blue, brown, and green dots represent the SNPs located in the A1, A16, and B25 region, respectively. The dots under the line mean that the SNPs are not significantly associated with the IB trait.

**Figure S18. The homozygote and heterozygote of each SNP and corresponding IB numbers.**

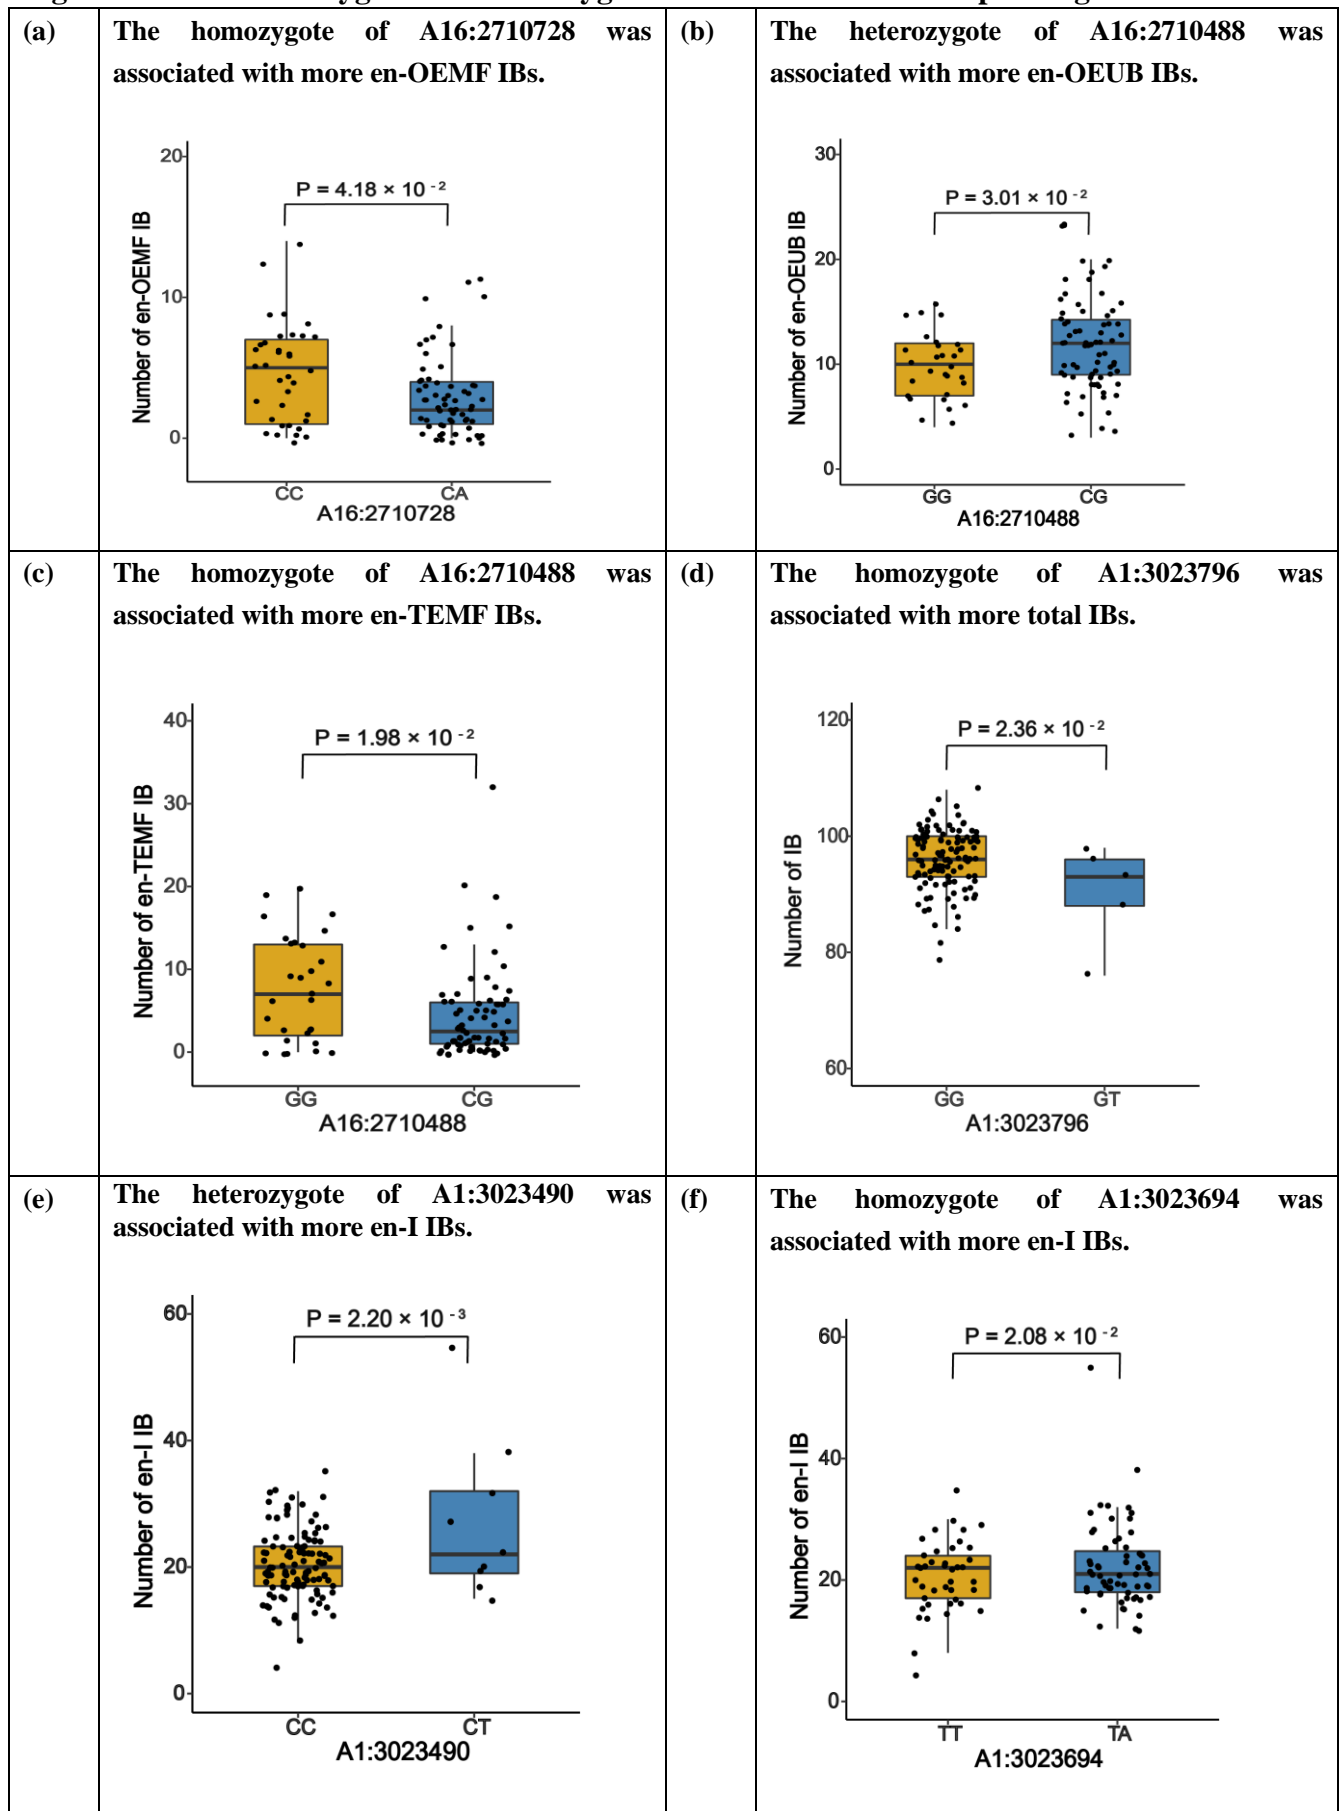

|                                                                                                                                                                                                                                                                          |                                                                                                                                                                                                                                                                          |
|--------------------------------------------------------------------------------------------------------------------------------------------------------------------------------------------------------------------------------------------------------------------------|--------------------------------------------------------------------------------------------------------------------------------------------------------------------------------------------------------------------------------------------------------------------------|
| <p>(g) The homozygote of A1:3023466 was associated with more en-OEUB IBs.</p> 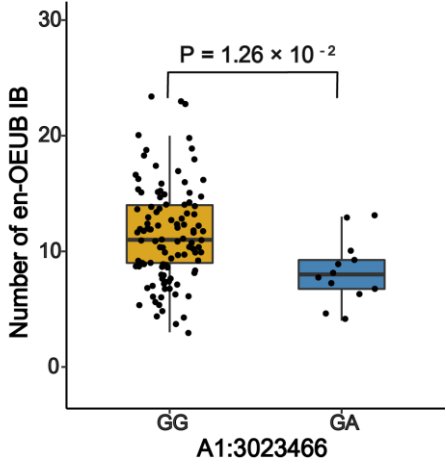 <p>Number of en-OEUB IB</p> <p>GG GA</p> <p>A1:3023466</p> <p><math>P = 1.26 \times 10^{-2}</math></p>   | <p>(h) The homozygote of A1:3023730 was associated with more en-TEBF IBs.</p>  <p>Number of en-TEBF IB</p> <p>GG GA</p> <p>A1:3023730</p> <p><math>P = 4.69 \times 10^{-2}</math></p>  |
| <p>(i) The homozygote of A1:3023753 was associated with more en-TEBF IBs.</p>  <p>Number of en-TEBF IB</p> <p>AA TA</p> <p>A1:3023753</p> <p><math>P = 5.00 \times 10^{-4}</math></p>  | <p>(j) The homozygote of A1:3023814 was associated with more en-TEBF IBs.</p>  <p>Number of en-TEBF IB</p> <p>AA GA</p> <p>A1:3023814</p> <p><math>P = 1.40 \times 10^{-3}</math></p> |
| <p>(k) The homozygote of A1:3023814 was associated with more en-TEMF IBs.</p>  <p>Number of en-TEMF IB</p> <p>AA GA</p> <p>A1:3023814</p> <p><math>P = 1.30 \times 10^{-3}</math></p> | <p>(l) The heterozygote of A1:3023447 was associated with more en-Y IBs.</p>  <p>Number of en-Y IB</p> <p>AA AT</p> <p>A1:3023447</p> <p><math>P = 1.30 \times 10^{-3}</math></p>    |

|     |                                                                                                                                                             |     |                                                                                                                                                                |
|-----|-------------------------------------------------------------------------------------------------------------------------------------------------------------|-----|----------------------------------------------------------------------------------------------------------------------------------------------------------------|
| (m) | <p>The heterozygote of A1:3023694 was associated with more en-Y IBs.</p> 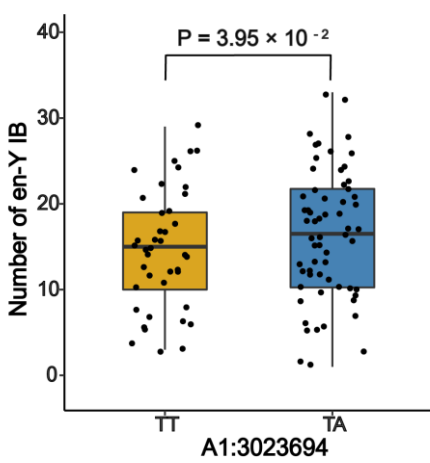  | (n) | <p>The heterozygote of A1:3023730 was associated with more ep-I IBs.</p>     |
| (o) | <p>The homozygote of B25:3800532 was associated with more IBs.</p>        | (p) | <p>The homozygote of B25:3800532 was associated with more en-IBs.</p>       |
| (q) | <p>The homozygote of B25:3800904 was associated with more en-I IBs.</p>  | (r) | <p>The heterozygote of B25:3800710 was associated with more en-I IBs.</p>  |

|     |                                                                                                                                                                                                                                                                          |     |                                                                                                                                                                                                                                                                           |
|-----|--------------------------------------------------------------------------------------------------------------------------------------------------------------------------------------------------------------------------------------------------------------------------|-----|---------------------------------------------------------------------------------------------------------------------------------------------------------------------------------------------------------------------------------------------------------------------------|
| (s) | <p>The heterozygote of B25:3800526 was associated with more en-OEMF IBs.</p> 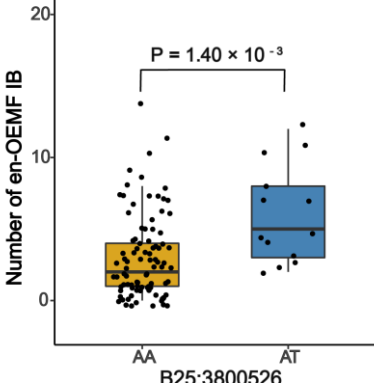 <p>Number of en-OEMF IB</p> <p>AA AT</p> <p>B25:3800526</p> <p><math>P = 1.40 \times 10^{-3}</math></p>   | (t) | <p>The heterozygote of B25:3800904 was associated with more en-OEMF IBs.</p>  <p>Number of en-OEMF IB</p> <p>CC CA</p> <p>B25:3800904</p> <p><math>P = 2.00 \times 10^{-5}</math></p>   |
| (u) | <p>The heterozygote of B25:3800999 was associated with more en-OEMF IBs.</p>  <p>Number of en-OEMF IB</p> <p>CC CA</p> <p>B25:3800999</p> <p><math>P = 3.42 \times 10^{-2}</math></p>  | (v) | <p>The homozygote of B25:3800710 was associated with more en-TEBF IBs.</p>  <p>Number of en-TEBF IB</p> <p>GG GA</p> <p>B25:3800710</p> <p><math>P = 4.33 \times 10^{-2}</math></p>    |
| (w) | <p>The heterozygote of B25:3800929 was associated with more en-TEBF IBs.</p>  <p>Number of en-TEBF IB</p> <p>AA AT</p> <p>B25:3800929</p> <p><math>P = 4.01 \times 10^{-2}</math></p> | (x) | <p>The heterozygote of B25:3801033 was associated with more en-TEBF IBs.</p>  <p>Number of en-TEBF IB</p> <p>AA AT</p> <p>B25:3801033</p> <p><math>P = 1.48 \times 10^{-2}</math></p> |



|      |                                                                                                                                                                                                                                                                          |      |                                                                                                                                                                                                                                                                           |
|------|--------------------------------------------------------------------------------------------------------------------------------------------------------------------------------------------------------------------------------------------------------------------------|------|---------------------------------------------------------------------------------------------------------------------------------------------------------------------------------------------------------------------------------------------------------------------------|
| (y)  | <p>The homozygote of B25:3800685 was associated with more en-TEMF IBs.</p> 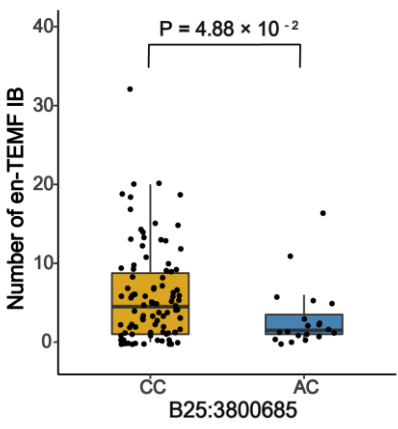 <p>Number of en-TEMF IB</p> <p>CC AC</p> <p>B25:3800685</p> <p><math>P = 4.88 \times 10^{-2}</math></p>     | (z)  | <p>The homozygote of B25:3800710 was associated with more en-TEMF IBs.</p>  <p>Number of en-TEMF IB</p> <p>GG GA</p> <p>B25:3800710</p> <p><math>P = 4.14 \times 10^{-2}</math></p>     |
| (aa) | <p>The heterozygote of B25:3801016 was associated with more en-Y IBs.</p>  <p>Number of en-Y IB</p> <p>TT TG</p> <p>B25:3801016</p> <p><math>P = 1.37 \times 10^{-2}</math></p>        | (ab) | <p>The heterozygote of B25:3801033 was associated with more ep-OEMF IBs.</p>  <p>Number of ep-OEMF IB</p> <p>AA AT</p> <p>B25:3801033</p> <p><math>P = 3.57 \times 10^{-2}</math></p>  |
| (ac) | <p>The heterozygote of B25:3800904 was associated with more ep-TEMF IBs.</p>  <p>Number of ep-TEMF IB</p> <p>CC CA</p> <p>B25:3800904</p> <p><math>P = 4.70 \times 10^{-3}</math></p> | (ad) | <p>The heterozygote of B25:3800911 was associated with more ep-TEMF IBs.</p>  <p>Number of ep-TEMF IB</p> <p>AA AT</p> <p>B25:3800911</p> <p><math>P = 1.18 \times 10^{-2}</math></p> |

(ae)

The homozygote of B25:3801016 was associated with more ep-Y IBs.

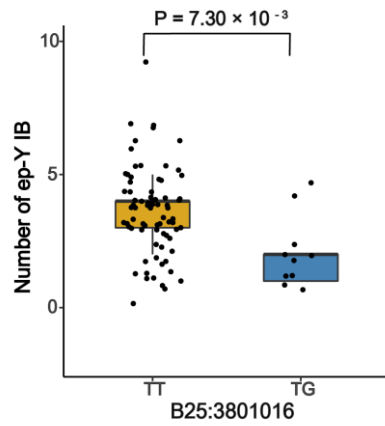

(af)

The homozygote of B25:3801028 was associated with more ep-Y IBs.

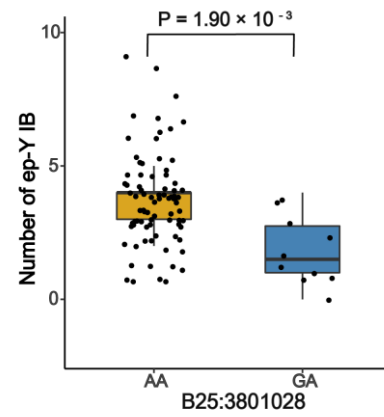

**Figure S19. The genotype combinations and corresponding IB numbers.**

- (a) Three genotype combinations in two SNP loci and corresponding numbers of total IBs.

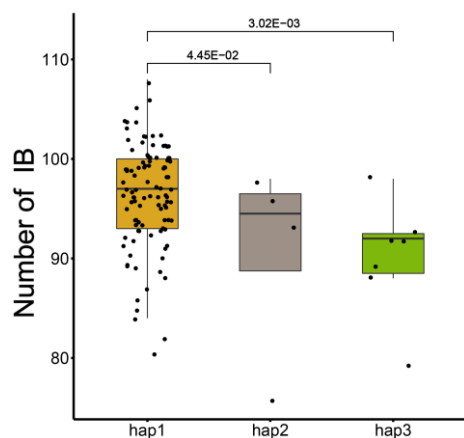

- (b) Seven genotype combinations in four SNP loci and corresponding numbers of en-I IBs.

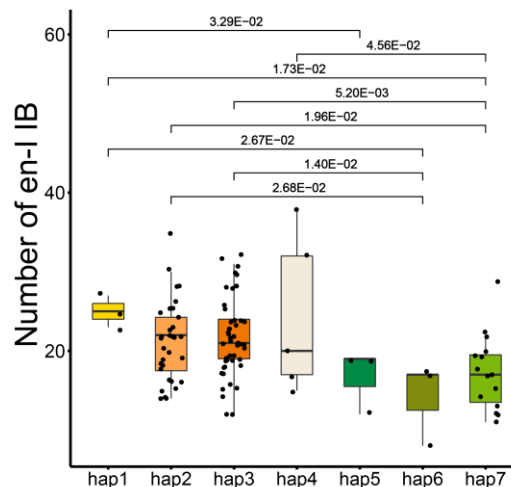

- (c) Five genotype combinations in four SNP loci and corresponding numbers of en-OEMF IBs.

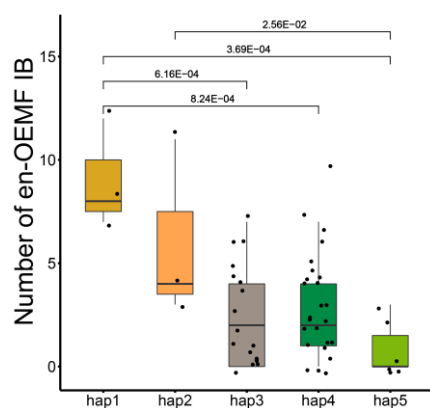

- (d) Four genotype combinations in two SNP loci and corresponding numbers of en-OEUB IBs.

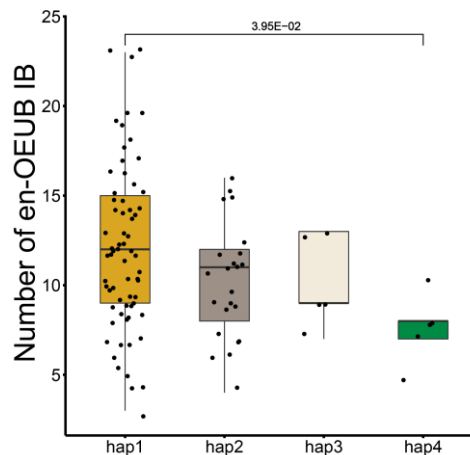

- (e) Twelve genotype combinations in six SNP loci and corresponding numbers of en-TEBF IBs.

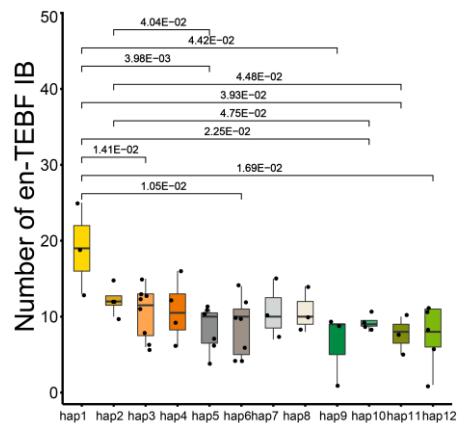

- (f) Eight genotype combinations in four SNP loci and corresponding numbers of en-TEMF IBs.

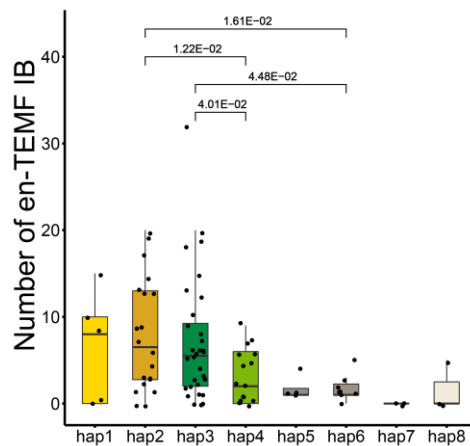

(g) Six genotype combinations in three SNP loci and corresponding numbers of en-Y IBs.

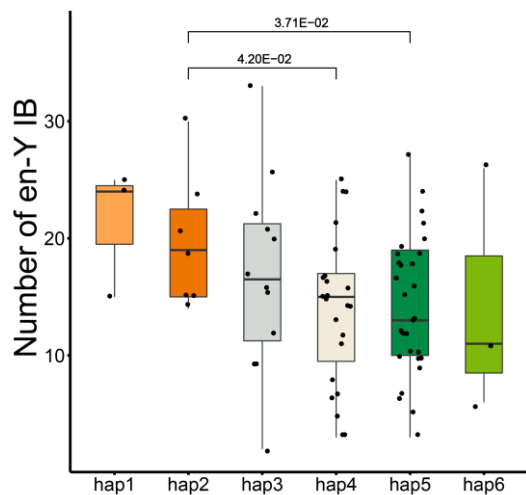

(h) Three genotype combinations in two SNP loci and corresponding numbers of ep-TEMF IBs.

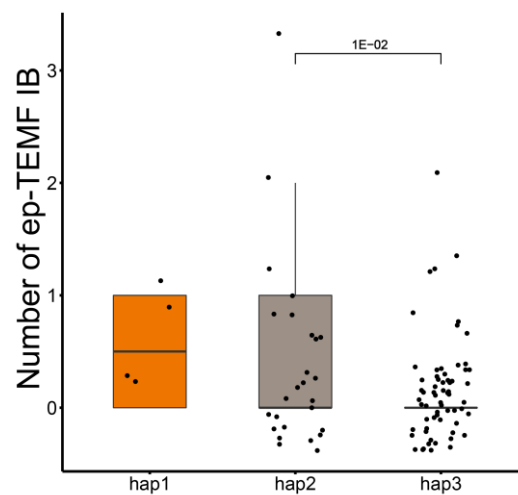

(i) Four genotype combinations in two SNP loci and corresponding numbers of ep-Y IBs.

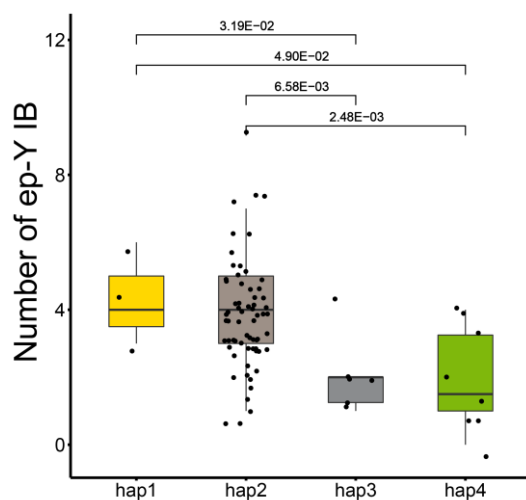

**Figure S20. The BMP-related genes identified with BSA in each strain.**

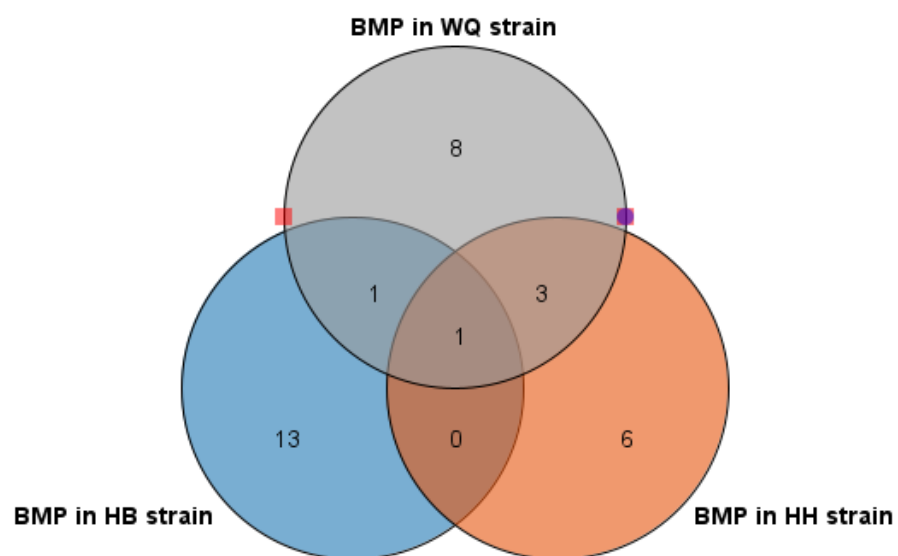

## Supplementary Tables

**Table S1. The primers used for amplification of the BSA-SNP regions.**

| Locus       | Primer sequence (5'-3')   | Tm | Amplification length (bp) |
|-------------|---------------------------|----|---------------------------|
| A1:3023753  | F: GTTCAGACTGCTGCTTGCTTC  | 55 | 516                       |
|             | R: CTATGAGCTCACCGCCTCTT   |    |                           |
| A16:2710463 | F: ACCCTAAGGCATAGCTCAACG  | 55 | 564                       |
|             | R: ACTCCTGGATGCACTTGTGT   |    |                           |
| B25:3800828 | F: TGTAGCTCCTCGAGGTTGGTT  | 55 | 683                       |
|             | R: ATCAGATCTCTGTGTGGAGCAC |    |                           |

**Table S2. The IB numbers in 122 common carp individuals from three strains (in a separated excel file).**

**Table S3. The identified BSA-SNPs in each strain.**

| Strain | IB-fewer group | IB-more group | Total      | Overlapping SNPs | Significant BSA-SNPs | Overlapping significant BSA-SNPs |
|--------|----------------|---------------|------------|------------------|----------------------|----------------------------------|
| HH     | 9,225,546      | 9,321,881     | 12,531,928 | 4,812,113        | 195,357              | 207                              |
| HB     | 8,511,519      | 8,611,217     | 10,835,374 |                  | 187,438              |                                  |
| WQ     | 8,763,283      | 8,644,975     | 11,477,507 |                  | 230,667              |                                  |

**Table S4. Slight higher Ts/Tv ratio and C/T transition in the BSA-SNPs than all SNPs in each strain.**

|    | Ts/Tv in all SNPs | Ts/Tv in the BSA-SNPs | C/T transition in all SNPs | C/T transition in BSA-SNP |
|----|-------------------|-----------------------|----------------------------|---------------------------|
| HB | 2.222             | 2.351                 | 34.5%                      | 35%                       |
| HH | 2.254             | 2.337                 | 34.6%                      | 35.2%                     |
| WQ | 2.241             | 2.316                 | 34.6%                      | 35.1%                     |

**Table S5. The enriched GO terms by the genes with the deleterious exonic BSA-SNPs in three strains.**

**Table S6. The functional annotations of 318 genes neighboring the shared 207 BSA-SNPs in three strains (in a separated excel file).**

**Table S7. The genotypes of three loci in 122 common carp individuals from three strains (in a separated excel file).**

**Table S8. Genetic diversities of three sequenced regions.**

| SNP locus  | Ref/Alt | Ho   | He   | PIC  | MAF  | Genotype | Frequencies of genotypes | Number | Classification |
|------------|---------|------|------|------|------|----------|--------------------------|--------|----------------|
| A1.3023447 | A/T     | 0.32 | 0.29 | 0.25 | 0.18 | AA       | 0.661                    | 80     | Intronic       |
|            |         |      |      |      |      | AT       | 0.322                    | 39     |                |
| A1.3023466 | G/A     | 0.1  | 0.09 | 0.09 | 0.05 | GA       | 0.099                    | 12     | Syn, A->A      |

|             |       |      |      |      |      |    |       |     |               |
|-------------|-------|------|------|------|------|----|-------|-----|---------------|
|             |       |      |      |      |      | GG | 0.901 | 109 |               |
| A1.3023490  | C/T   | 0.07 | 0.07 | 0.07 | 0.04 | CC | 0.926 | 112 | Syn, D->D     |
|             |       |      |      |      |      | CT | 0.074 | 9   |               |
| A1.3023505  | C/T   | 0.1  | 0.09 | 0.09 | 0.05 | CC | 0.901 | 109 | Syn, S->S     |
|             |       |      |      |      |      | CT | 0.099 | 12  |               |
| A1.3023508  | C/T   | 0.12 | 0.12 | 0.11 | 0.06 | CC | 0.876 | 106 | Non-syn, P->L |
|             |       |      |      |      |      | CT | 0.124 | 15  |               |
| A1.3023523  | C/T   | 0.04 | 0.06 | 0.05 | 0.03 | CC | 0.95  | 115 | Syn, H->H     |
|             |       |      |      |      |      | CT | 0.041 | 5   |               |
| A1.3023570  | G/A   | 0.28 | 0.28 | 0.24 | 0.17 | AA | 0.694 | 84  | Intronic      |
|             |       |      |      |      |      | GA | 0.281 | 34  |               |
| A1.3023571  | C/G/T | 0.34 | 0.34 | 0.3  | 0.03 | CC | 0.628 | 76  | Intronic      |
|             |       |      |      |      |      | CG | 0.273 | 33  |               |
|             |       |      |      |      |      | GG | 0.033 | 4   |               |
|             |       |      |      |      |      | CT | 0.066 | 8   |               |
| A1.3023635  | C/T   | 0.15 | 0.15 | 0.14 | 0.08 | CC | 0.843 | 102 | Intronic      |
|             |       |      |      |      |      | CT | 0.149 | 18  |               |
| A1.3023676  | G/A   | 0.14 | 0.13 | 0.12 | 0.07 | GA | 0.14  | 17  | Syn, K->K     |
|             |       |      |      |      |      | GG | 0.86  | 104 |               |
| A1.3023685  | T/C   | 0.31 | 0.3  | 0.26 | 0.19 | CC | 0.661 | 80  | Syn, P->P     |
|             |       |      |      |      |      | TC | 0.306 | 37  |               |
|             |       |      |      |      |      | TT | 0.033 | 4   |               |
| A1.3023694  | T/A   | 0.51 | 0.48 | 0.37 | 0.4  | AA | 0.149 | 18  | Syn, T->T     |
|             |       |      |      |      |      | TA | 0.512 | 62  |               |
|             |       |      |      |      |      | TT | 0.339 | 41  |               |
| A1.3023730  | G/A   | 0.09 | 0.09 | 0.08 | 0.05 | GA | 0.092 | 11  | Syn, R->R     |
|             |       |      |      |      |      | GG | 0.908 | 108 |               |
| A1.3023745* | G/A   | 0.29 | 0.27 | 0.23 | 0.16 | GA | 0.289 | 35  | Non-Syn, M->I |
|             |       |      |      |      |      | GG | 0.694 | 84  |               |
| A1.3023753* | T/A   | 0.45 | 0.49 | 0.37 | 0.43 | AA | 0.347 | 42  | Non-Syn, L->Q |
|             |       |      |      |      |      | TA | 0.446 | 54  |               |
|             |       |      |      |      |      | TT | 0.207 | 25  |               |
| A1.3023796  | G/T   | 0.04 | 0.04 | 0.04 | 0.02 | GG | 0.959 | 116 | Syn, V->V     |
|             |       |      |      |      |      | GT | 0.041 | 5   |               |
| A1.3023814  | G/A   | 0.35 | 0.36 | 0.29 | 0.23 | AA | 0.595 | 72  | Syn, A->A     |
|             |       |      |      |      |      | GA | 0.347 | 42  |               |
|             |       |      |      |      |      | GG | 0.058 | 7   |               |
| B25.3800526 | A/T   | 0.12 | 0.2  | 0.18 | 0.11 | AA | 0.826 | 90  | Intronic      |
|             |       |      |      |      |      | AT | 0.119 | 13  |               |
|             |       |      |      |      |      | TT | 0.055 | 6   |               |
| B25.3800532 | T/G   | 0.06 | 0.06 | 0.06 | 0.03 | TG | 0.062 | 7   | Intronic      |
|             |       |      |      |      |      | TT | 0.938 | 106 |               |

|              |     |      |      |      |      |    |       |     |                  |
|--------------|-----|------|------|------|------|----|-------|-----|------------------|
| B25.3800622  | G/C | 0.27 | 0.29 | 0.25 | 0.18 | CC | 0.042 | 5   | Syn, S->S        |
|              |     |      |      |      |      | GC | 0.267 | 32  |                  |
|              |     |      |      |      |      | GG | 0.692 | 83  |                  |
| B25.3800655  | C/T | 0.33 | 0.44 | 0.35 | 0.33 | CC | 0.5   | 60  | Syn, C->C        |
|              |     |      |      |      |      | CT | 0.333 | 40  |                  |
|              |     |      |      |      |      | TT | 0.167 | 20  |                  |
| B25.3800664  | C/G | 0.26 | 0.31 | 0.27 | 0.2  | CC | 0.675 | 81  | Syn, T->T        |
|              |     |      |      |      |      | CG | 0.258 | 31  |                  |
|              |     |      |      |      |      | GG | 0.067 | 8   |                  |
| B25.3800685  | A/C | 0.17 | 0.18 | 0.16 | 0.1  | AC | 0.167 | 20  | Syn, T->T        |
|              |     |      |      |      |      | CC | 0.817 | 98  |                  |
| B25.3800709  | C/T | 0.27 | 0.34 | 0.28 | 0.22 | CC | 0.647 | 77  | Syn, P->P        |
|              |     |      |      |      |      | CT | 0.269 | 32  |                  |
|              |     |      |      |      |      | TT | 0.084 | 10  |                  |
| B25.3800710* | G/A | 0.06 | 0.07 | 0.07 | 0.04 | GA | 0.059 | 7   | Non-Syn,<br>V->M |
|              |     |      |      |      |      | GG | 0.933 | 111 |                  |
| B25.3800766  | C/T | 0.16 | 0.2  | 0.18 | 0.11 | CC | 0.808 | 97  | Syn, N->N        |
|              |     |      |      |      |      | CT | 0.158 | 19  |                  |
|              |     |      |      |      |      | TT | 0.033 | 4   |                  |
| B25.3800808  | C/T | 0.4  | 0.45 | 0.35 | 0.33 | CC | 0.463 | 56  | Syn, D->D        |
|              |     |      |      |      |      | CT | 0.405 | 49  |                  |
|              |     |      |      |      |      | TT | 0.132 | 16  |                  |
| B25.3800828* | C/G | 0.24 | 0.31 | 0.26 | 0.19 | CC | 0.074 | 9   | Non-Syn, T->S    |
|              |     |      |      |      |      | CG | 0.24  | 29  |                  |
|              |     |      |      |      |      | GG | 0.686 | 83  |                  |
| B25.3800847  | A/C | 0.25 | 0.33 | 0.27 | 0.21 | AA | 0.669 | 81  | Syn, L->L        |
|              |     |      |      |      |      | AC | 0.248 | 30  |                  |
|              |     |      |      |      |      | CC | 0.083 | 10  |                  |
| B25.3800867  | A/G | 0.05 | 0.06 | 0.06 | 0.03 | AA | 0.942 | 114 | Intronic         |
|              |     |      |      |      |      | AG | 0.05  | 6   |                  |
| B25.3800875  | A/G | 0.37 | 0.41 | 0.33 | 0.29 | AA | 0.521 | 63  | Intronic         |
|              |     |      |      |      |      | AG | 0.372 | 45  |                  |
|              |     |      |      |      |      | GG | 0.107 | 13  |                  |
| B25.3800879  | C/T | 0.38 | 0.41 | 0.33 | 0.29 | CC | 0.517 | 62  | Intronic         |
|              |     |      |      |      |      | CT | 0.383 | 46  |                  |
|              |     |      |      |      |      | TT | 0.1   | 12  |                  |
| B25.3800895  | A/G | 0.4  | 0.47 | 0.36 | 0.37 | AA | 0.43  | 52  | Intronic         |
|              |     |      |      |      |      | AG | 0.405 | 49  |                  |
|              |     |      |      |      |      | GG | 0.165 | 20  |                  |
| B25.3800904  | C/A | 0.06 | 0.1  | 0.1  | 0.05 | CA | 0.058 | 7   | Intronic         |
|              |     |      |      |      |      | CC | 0.917 | 111 |                  |
| B25.3800911  | A/T | 0.27 | 0.24 | 0.21 | 0.14 | AA | 0.724 | 71  | Intronic         |



|             |     |      |      |      |      |    |       |     |           |
|-------------|-----|------|------|------|------|----|-------|-----|-----------|
|             |     |      |      |      |      | AT | 0.265 | 26  |           |
| B25.3800929 | A/T | 0.06 | 0.08 | 0.08 | 0.04 | AA | 0.927 | 76  | Intronic  |
|             |     |      |      |      |      | AT | 0.061 | 5   |           |
| B25.3800999 | C/A | 0.24 | 0.35 | 0.29 | 0.22 | AA | 0.106 | 9   | Intronic  |
|             |     |      |      |      |      | CA | 0.235 | 20  |           |
|             |     |      |      |      |      | CC | 0.659 | 56  |           |
| B25.3801007 | G/T | 0.36 | 0.49 | 0.37 | 0.43 | GG | 0.391 | 34  | Intronic  |
|             |     |      |      |      |      | GT | 0.356 | 31  |           |
|             |     |      |      |      |      | TT | 0.253 | 22  |           |
| B25.3801016 | T/G | 0.11 | 0.18 | 0.16 | 0.1  | GG | 0.044 | 4   | Intronic  |
|             |     |      |      |      |      | TG | 0.11  | 10  |           |
|             |     |      |      |      |      | TT | 0.846 | 77  |           |
| B25.3801025 | T/G | 0.04 | 0.06 | 0.06 | 0.03 | TG | 0.041 | 4   | Intronic  |
|             |     |      |      |      |      | TT | 0.948 | 92  |           |
| B25.3801028 | G/A | 0.11 | 0.16 | 0.14 | 0.09 | AA | 0.862 | 81  | Intronic  |
|             |     |      |      |      |      | GA | 0.106 | 10  |           |
| B25.3801033 | A/T | 0.37 | 0.37 | 0.3  | 0.25 | AA | 0.568 | 54  | Intronic  |
|             |     |      |      |      |      | AT | 0.368 | 35  |           |
|             |     |      |      |      |      | TT | 0.063 | 6   |           |
| B25.3801054 | A/T | 0.3  | 0.38 | 0.3  | 0.25 | AA | 0.098 | 9   | Intronic  |
|             |     |      |      |      |      | AT | 0.304 | 28  |           |
|             |     |      |      |      |      | TT | 0.598 | 55  |           |
| B25.3801083 | T/G | 0.37 | 0.48 | 0.36 | 0.4  | GG | 0.419 | 39  | Intronic  |
|             |     |      |      |      |      | TG | 0.366 | 34  |           |
|             |     |      |      |      |      | TT | 0.215 | 20  |           |
| A16.2710488 | C/G | 0.69 | 0.47 | 0.36 | 0.38 | CG | 0.692 | 72  | Syn, L->L |
|             |     |      |      |      |      | GG | 0.279 | 29  |           |
| A16.2710697 | A/G | 0.3  | 0.27 | 0.23 | 0.16 | AG | 0.304 | 31  | Intronic  |
|             |     |      |      |      |      | GG | 0.686 | 70  |           |
| A16.2710718 | A/G | 0.31 | 0.29 | 0.25 | 0.17 | AA | 0.67  | 67  | Intronic  |
|             |     |      |      |      |      | AG | 0.31  | 31  |           |
| A16.2710728 | C/A | 0.61 | 0.45 | 0.35 | 0.34 | AA | 0.039 | 4   | Intronic  |
|             |     |      |      |      |      | CA | 0.612 | 63  |           |
|             |     |      |      |      |      | CC | 0.35  | 36  |           |
| A16.2710743 | T/C | 0.11 | 0.1  | 0.1  | 0.06 | TC | 0.111 | 13  | Intronic  |
|             |     |      |      |      |      | TT | 0.889 | 104 |           |

The locus with the asterisk means that it is non-synonymous.

**Table S9. The joint effects of the associated SNPs.**

| Trait   | Hap name | Hap sequence      | sample number | median | Mean $\pm$ SD     | Marker R <sup>2</sup> (%) |
|---------|----------|-------------------|---------------|--------|-------------------|---------------------------|
| IB      | hap1     | GG/TT             | 101           | 97     | 96.31 $\pm$ 5.15  | 10.00                     |
|         | hap2     | GT/TT             | 4             | 94.5   | 90.75 $\pm$ 10.05 |                           |
|         | hap3     | GG/TG             | 7             | 92     | 90.14 $\pm$ 5.87  |                           |
| en-I    | hap1     | CC/TA/CC/GA       | 3             | 25     | 25.00 $\pm$ 2.00  | 15.93                     |
|         | hap2     | CC/TT/CC/GG       | 32            | 22     | 21.13 $\pm$ 5.09  |                           |
|         | hap3     | CC/TA/CC/GG       | 46            | 21     | 21.61 $\pm$ 4.00  |                           |
|         | hap4     | CT/TA/CC/GG       | 5             | 20     | 24.40 $\pm$ 10.07 |                           |
|         | hap5     | CC/TA/CA/GG       | 3             | 19     | 16.67 $\pm$ 4.04  |                           |
|         | hap6     | CC/AA/CC/GG       | 15            | 17     | 17.33 $\pm$ 4.82  |                           |
|         | hap7     | CC/TT/CA/GG       | 3             | 17     | 14.00 $\pm$ 5.20  |                           |
| en-OEMF | hap1     | AT/CA/CA/CC       | 3             | 8      | 9.00 $\pm$ 2.65   | 34.30                     |
|         | hap2     | AT/CC/CA/CA       | 3             | 4      | 6.00 $\pm$ 4.36   |                           |
|         | hap3     | AA/CC/CC/CA       | 25            | 2      | 3.04 $\pm$ 2.57   |                           |
|         | hap4     | AA/CC/CC/CC       | 17            | 2      | 2.59 $\pm$ 2.45   |                           |
|         | hap5     | AA/CC/CA/CA       | 6             | 0      | 0.83 $\pm$ 1.33   |                           |
| en-OEUB | hap1     | GG/CG             | 67            | 12     | 12.03 $\pm$ 4.67  | 7.44                      |
|         | hap2     | GG/GG             | 23            | 11     | 10.22 $\pm$ 3.20  |                           |
|         | hap3     | GA/CG             | 5             | 9      | 10.20 $\pm$ 2.68  |                           |
|         | hap4     | GA/GG             | 5             | 8      | 7.60 $\pm$ 1.82   |                           |
| en-TEBF | hap1     | TT/AA/GG/GG/AA/TT | 3             | 19     | 19.00 $\pm$ 6.00  | 42.07                     |
|         | hap2     | AA/AA/GG/GG/AA/AA | 4             | 12     | 12.25 $\pm$ 2.06  |                           |
|         | hap3     | TA/AA/GG/GG/AA/AA | 8             | 11.5   | 10.50 $\pm$ 3.42  |                           |
|         | hap4     | TT/AA/GG/GG/AA/AA | 4             | 10.5   | 10.75 $\pm$ 4.27  |                           |
|         | hap5     | TA/AA/GG/GG/AA/AT | 7             | 10     | 8.57 $\pm$ 3.95   |                           |
|         | hap6     | TA/GA/GG/GG/AA/AA | 7             | 10     | 8.43 $\pm$ 2.76   |                           |
|         | hap7     | TT/AA/GG/GG/AA/AT | 3             | 10     | 10.67 $\pm$ 3.06  |                           |
|         | hap8     | TT/GA/GG/GG/AA/AT | 3             | 10     | 10.67 $\pm$ 4.04  |                           |
|         | hap9     | AA/AA/GG/GG/AA/AT | 4             | 9      | 9.25 $\pm$ 1.26   |                           |
|         | hap10    | AA/GG/GG/GG/AA/AA | 3             | 9      | 6.33 $\pm$ 4.62   |                           |
|         | hap11    | AA/GA/GG/GG/AA/AA | 5             | 8      | 7.40 $\pm$ 4.16   |                           |
|         | hap12    | TA/GA/GG/GG/AA/AT | 3             | 8      | 7.67 $\pm$ 2.52   |                           |
| en-TEMF | hap1     | GA/GG/CC/GG       | 5             | 8      | 6.60 $\pm$ 6.54   | 17.57                     |
|         | hap2     | AA/GG/CC/GG       | 20            | 6.5    | 7.85 $\pm$ 6.56   |                           |
|         | hap3     | AA/CG/CC/GG       | 32            | 5.5    | 7.13 $\pm$ 7.21   |                           |
|         | hap4     | GA/CG/CC/GG       | 16            | 2      | 3.13 $\pm$ 3.12   |                           |
|         | hap5     | GA/CG/AC/GG       | 8             | 1      | 1.75 $\pm$ 1.58   |                           |
|         | hap6     | GG/CG/CC/GG       | 4             | 1      | 1.75 $\pm$ 1.50   |                           |
|         | hap7     | AA/CG/AC/GA       | 3             | 0      | 1.67 $\pm$ 2.89   |                           |
|         | hap8     | GA/CG/CC/GA       | 3             | 0      | 0.00 $\pm$ 0.00   |                           |

|         |      |          |    |      |             |       |
|---------|------|----------|----|------|-------------|-------|
| en-Y    | hap1 | AA/AA/TG | 3  | 24   | 21.33±5.51  | 9.99  |
|         | hap2 | AA/AA/TT | 7  | 19   | 19.71±5.82  |       |
|         | hap3 | AT/TA/TT | 12 | 16.5 | 16.83±8.37  |       |
|         | hap4 | AATT/TT  | 23 | 15   | 13.91±6.43  |       |
|         | hap5 | AA/TA/TT | 29 | 13   | 14.31±5.94  |       |
|         | hap6 | AT/TA/TG | 3  | 11   | 14.33±10.41 |       |
| ep-TEMF | hap1 | CA/AA    | 4  | 0.5  | 0.50±0.58   | 7.95  |
|         | hap2 | CC/AA    | 64 | 0    | 0.14±0.39   |       |
|         | hap3 | CC/AT    | 26 | 0    | 0.46±0.76   |       |
| ep-Y    | hap1 | TT/AA    | 65 | 4    | 3.80±1.53   | 18.21 |
|         | hap2 | GG/AA    | 3  | 4    | 4.33±1.53   |       |
|         | hap3 | TG/AA    | 6  | 2    | 2.00±1.10   |       |
|         | hap4 | TT/AG    | 8  | 1.5  | 2.00±1.51   |       |

**Table S10. The BMP-related genes having the deleterious exonic BSA-SNPs in each strain (in a separated excel file).**
