# Supplementary material for: Bulked Segregant Analysis and Association Analysis Identified the Polymorphisms Related to the Intermuscular Bones in Common Carp (Cyprinus carpio)
Source: Biology (Basel). 2022 Mar 21;11(3):477. doi: 10.3390/biology11030477 (PMC8945855; doi:10.3390/biology11030477)
Supplement: Supplementary file 1 [file biology-11-00477-s001.zip]

Archive with 6 entries (6 files):
- Supplementary information.pdf
- Supplementary-Table-S10.xlsx
- Supplementary-Table-S2.xlsx
- Supplementary-Table-S5.xlsx
- Supplementary-Table-S6.xls
- Supplementary-Table-S7.xlsx
