# Supplementary material for: Bulked Segregant Analysis and Association Analysis Identified the Polymorphisms Related to the Intermuscular Bones in Common Carp (Cyprinus carpio)
Source: Biology (Basel). 2022 Mar 21;11(3):477. doi: 10.3390/biology11030477 (PMC8945855; doi:10.3390/biology11030477)
Supplement: Supplementary file 1 [file biology-11-00477-s001.zip › Supplementary-Table-S2.xlsx]

## Sheet: Sheet1
Group	Sample ID	Body length	IB	epineural (en)	epipleural (ep)	en-I shape	en-卜shape (one-end-unequal-bi-fork type)	en-Y shape	en-OEMF shape	en-TEBF shape	en-TEMF shape	en-TBT shape	ep-I shape	ep-卜shape (one-end-unequal-bi-fork type)	ep-Y shape	ep-OEMF shape	ep-TEBF shape	ep-TEMF shape	ep-TBT
	WQ4	16.5	95	65	30	19	6	18	2	8	12	0	18	5	3	1	3	0	0
WQ-fewer-group	WQ5	14.5	89	61	28	17	14	19	1	7	3	0	17	6	5	0	0	0	0
WQ-fewer-group	WQ6	17.5	87	58	29	4	13	14	4	7	15	1	16	7	5	1	0	0	0
WQ-fewer-group	WQ7	13	84	63	21	14	11	21	5	6	6	0	11	5	4	0	1	0	0
WQ-fewer-group	WQ8	13	82	60	22	21	10	22	0	4	3	0	16	4	2	0	0	0	0
WQ-fewer-group	WQ9	13	91	61	30	15	10	22	2	6	6	0	17	6	7	0	0	0	0
WQ-fewer-group	WQ10	11.5	76	55	21	28	5	15	1	3	3	0	17	3	1	0	0	0	0
	WQ11	18	96	64	32	18	14	10	10	8	4	0	18	5	5	1	2	1	0
	WQ12	14.5	97	66	31	21	9	16	4	10	6	0	19	8	4	0	0	0	0
WQ-more-group	WQ13	14	104	70	34	19	19	19	0	13	0	0	23	7	4	0	0	0	0
	WQ14	12.5	94	66	28	18	13	15	3	11	6	0	21	6	1	0	0	0	0
WQ-more-group	WQ15	12.5	100	68	32	17	13	19	4	12	3	0	19	9	4	0	0	0	0
	WQ16	12.5	98	66	32	12	11	15	9	11	8	0	15	8	5	3	1	0	0
	WQ17	12.5	93	63	30	15	8	26	1	7	6	0	15	7	5	2	1	0	0
WQ-fewer-group	WQ18	11	92	65	27	19	18	24	0	4	0	0	21	4	2	0	0	0	0
	WQ19	12	92	65	27	21	10	21	1	10	2	0	17	3	4	0	2	1	0
	WQ20	12	97	67	30	32	9	17	1	7	1	0	21	3	3	2	1	0	0
	WQ21	11	94	63	31	15	16	22	1	9	0	0	19	4	5	0	0	3	0
	WQ22	10.5	93	60	33	17	7	30	1	3	2	0	24	5	3	0	1	0	0
	WQ23	9	97	66	31	21	14	21	1	8	1	0	20	6	3	1	0	1	0
	WQ24	10.5	93	66	27	18	14	17	4	10	3	0	18	7	2	0	0	0	0
	WQ25	9	96	67	29	25	12	16	1	6	7	0	22	5	1	1	0	0	0
WQ-more-group	WQ27	9.5	100	69	31	19	17	32	0	1	0	0	17	8	4	1	0	1	0
	WQ28	11.5	96	65	31	23	18	3	2	10	9	0	20	8	3	0	0	0	0
WQ-more-group	WQ29	9	100	68	32	22	23	18	3	1	1	0	24	6	2	0	0	0	0
WQ-more-group	WQ30	11.5	99	67	32	24	23	10	1	8	1	0	22	5	3	0	1	1	0
WQ-more-group	WQ31	11	100	68	32	18	20	14	1	9	6	0	18	10	3	0	0	1	0
	WQ32	12	98	67	31	22	13	20	2	8	2	0	21	6	4	0	0	0	0
	WQ33	10.5	96	68	28	30	7	25	3	3	0	0	20	3	5	0	0	0	0
	WQ34	8.5	95	65	30	23	9	27	0	6	0	0	23	4	3	0	0	0	0
	WQ35	12	92	64	28	18	11	26	0	8	1	0	15	8	2	3	0	0	0
WQ-more-group	WQ36	11.5	99	66	33	22	12	12	0	15	5	0	24	6	3	0	0	0	0
	WQ37	9.5	94	63	31	22	12	25	0	4	0	0	20	6	5	0	0	0	0
	WQ38	12	98	68	30	15	12	28	3	6	4	0	15	8	6	1	0	0	0
HB-fewer-group	HB5	16	90	63	27	20	14	14	4	9	2	0	17	7	3	0	0	0	0
HB-fewer-group	HB6	12	89	65	24	12	13	12	7	15	6	0	13	6	4	0	0	1	0
HB-fewer-group	HB7	13.5	86	66	20	17	8	24	7	9	1	0	13	4	3	0	0	0	0
HB-fewer-group	HB8	12.5	87	63	24	12	9	16	6	12	8	0	14	4	6	0	0	0	0
	HB9	12.5	94	65	29	12	9	19	14	8	3	0	14	9	4	0	2	0	0
HB-fewer-group	HB10	12	89	59	30	8	9	19	8	10	5	0	18	5	6	0	0	1	0
HB-fewer-group	HB11	12.5	80	60	20	18	13	21	5	1	2	0	12	5	3	0	0	0	0
	HB12	14	94	67	27	18	12	16	6	6	9	0	18	6	3	0	0	0	0
	HB13	15	96	63	33	11	11	15	3	6	17	0	20	7	5	0	1	0	0
HB-fewer-group	HB14	11.8	90	60	30	22	11	15	0	11	1	0	25	3	2	0	0	0	0
	HB15	17	91	66	25	24	4	3	6	14	15	0	14	4	4	1	0	2	0
	HB16	14.8	100	67	33	15	10	17	4	10	11	0	14	8	4	4	1	2	0
	HB17	16.6	92	66	26	14	9	8	9	13	13	0	14	5	5	0	1	1	0
	HB18	14	96	66	30	19	6	15	2	9	15	0	18	7	4	0	0	1	0
HB-more-group	HB19	18	106	72	34	22	5	7	6	12	20	0	20	3	5	2	4	0	0
	HB20	16.5	101	68	33	17	10	8	7	8	18	0	17	4	7	1	1	3	0
HB-more-group	HB21	15	104	71	33	22	15	6	7	11	10	0	14	9	8	2	0	0	0
	HB22	12	100	70	30	28	10	12	7	13	0	0	19	7	4	0	0	0	0
	HB23	15	99	67	32	24	8	13	3	12	7	0	20	9	3	0	0	0	0
	HB24	18	101	72	29	24	15	10	3	13	7	0	21	6	1	0	1	0	0
	HB25	10.5	102	69	33	22	17	15	1	14	0	0	20	7	4	1	0	1	0
	HB26	13.5	101	71	30	21	15	10	11	8	6	0	19	6	3	2	0	0	0
	HB27	16	96	65	31	18	10	6	3	18	10	0	18	9	1	0	2	1	0
	HB28	9.5	96	69	27	30	15	20	1	2	1	0	20	3	4	0	0	0	0
	HB29	11	99	66	33	14	17	14	3	11	7	0	22	4	4	3	0	0	0
	HB30	16	99	68	31	28	9	18	0	11	2	0	22	4	4	0	1	0	0
	HB31	15	98	69	29	25	14	13	2	14	1	0	18	7	3	0	1	0	0
	HB32	17	102	68	34	16	12	24	5	11	0	0	22	7	5	0	0	0	0
	HB33	17	102	71	31	21	8	5	3	2	32	0	18	7	4	2	0	0	0
HB-more-group	HB34	13	108	71	37	13	12	20	4	9	13	0	20	7	7	0	2	1	0
	HB35	16.5	99	71	28	15	23	2	7	11	13	0	7	12	5	1	3	0	0
	HB36	14.5	100	68	32	29	12	9	4	10	4	0	23	5	2	1	0	1	0
	HB37	14	99	67	32	22	12	6	3	12	12	0	18	8	4	0	1	1	0
	HB38	12	100	69	31	31	9	10	4	12	3	0	27	3	1	0	0	0	0
	HB39	15	96	65	31	19	14	24	2	5	1	0	21	4	5	1	0	0	0
	HB40	11.5	98	65	33	26	16	3	0	19	1	0	19	9	5	0	0	0	0
	HB41	14	99	69	30	16	11	6	7	15	14	0	14	7	5	4	0	0	0
HB-more-group	HB42	11	104	68	36	19	13	17	7	10	2	0	25	5	6	0	0	0	0
	HB43	13	102	68	34	16	10	5	5	18	14	0	10	12	9	2	1	0	0
	HB44	12	101	68	33	23	15	15	4	9	2	0	20	3	9	1	0	0	0
	HB45	18	99	69	30	22	4	4	7	13	19	0	22	4	4	0	0	0	0
	HB46	14	95	66	29	19	19	12	1	9	6	0	16	9	3	1	0	0	0
	HB47	15	102	69	33	25	7	7	7	10	13	0	22	4	4	2	1	0	0
	HB48	13.5	100	70	30	20	12	10	6	13	9	0	21	6	3	0	0	0	0
HB-more-group	HB49	13.5	103	67	36	22	6	9	6	4	20	0	14	15	4	2	1	0	0
	HB50	13	96	66	30	17	9	9	10	15	6	0	16	6	7	1	0	0	0
	HB51	16.5	95	66	29	16	7	15	5	14	9	0	16	9	3	1	0	0	0
	HB52	14	101	70	31	19	8	9	4	25	5	0	17	10	2	2	0	0	0
HB-more-group	HB53	13	102	70	32	28	8	12	1	16	5	0	27	3	1	1	0	0	0
HB-more-group	HB54	13	105	70	35	17	7	5	12	10	19	0	23	7	5	0	0	0	0
HH-fewer-group	HH6	16.5	85	61	24	55	5	1	0	0	0	0	24	0	0	0	0	0	0
HH-fewer-group	HH7	15	79	58	21	38	7	6	2	2	3	0	19	1	1	0	0	0	0
	HH8	15.3	95	66	29	26	16	11	0	10	3	0	22	3	1	2	0	1	0
HH-fewer-group	HH9	14.5	88	63	25	20	15	24	1	3	0	0	17	5	3	0	0	0	0
	HH10	14.8	99	65	34	18	11	29	1	6	0	0	23	5	5	0	1	0	0
	HH11	14.3	96	64	32	17	12	22	3	8	2	0	23	5	3	0	0	1	0
	HH12	13.8	93	64	29	19	12	24	8	1	0	0	21	3	4	1	0	0	0
HH-more-group	HH13	15	99	71	28	23	10	12	5	10	11	0	18	7	3	0	0	0	0
	HH14	13.5	93	63	30	19	5	19	2	9	9	0	20	5	5	0	0	0	0
HH-fewer-group	HH15	13	88	63	25	30	6	12	1	9	5	0	22	3	0	0	0	0	0
	HH16	14	93	63	30	20	3	29	4	6	1	0	23	4	1	1	1	0	0
	HH17	14.5	96	63	33	19	7	13	3	5	16	0	21	6	4	2	0	0	0
	HH18	14	96	64	32	12	13	22	6	6	5	0	22	6	4	0	0	0	0
	HH19	13	95	64	31	27	6	19	2	8	2	0	25	5	1	0	0	0	0
	HH20	13.5	93	63	30	19	15	13	11	3	2	0	25	2	2	0	0	1	0
HH-more-group	HH21	13	101	67	34	19	13	19	3	8	5	0	21	7	5	0	1	0	0
HH-more-group	HH22	13	100	66	34	14	12	18	7	8	7	0	23	8	3	0	0	0	0
	HH23	10	98	63	35	23	7	12	0	16	5	0	20	7	4	2	0	2	0
	HH24	10.5	93	60	33	20	9	26	1	3	1	0	22	7	3	1	0	0	0
HH-fewer-group	HH25	9	88	66	22	32	9	19	0	6	0	0	20	1	1	0	0	0	0
HH-fewer-group	HH26	12	89	65	24	23	20	14	8	0	0	0	18	3	3	0	0	0	0
	HH27	12	97	65	32	23	13	22	6	1	0	0	29	2	1	0	0	0	0
	HH28	11.5	91	65	26	24	9	25	2	4	1	0	20	6	0	0	0	0	0
HH-fewer-group	HH29	10.5	89	65	24	22	7	22	2	12	0	0	17	2	5	0	0	0	0
HH-more-group	HH30	9	101	68	33	25	15	22	3	3	0	0	28	3	2	0	0	0	0
	HH31	11.5	92	61	31	28	9	16	2	6	0	0	26	4	1	0	0	0	0
	HH32	11	92	64	28	19	8	33	2	1	1	0	21	2	5	0	0	0	0
	HH33	12.5	97	64	33	17	12	21	1	8	5	0	22	7	3	1	0	0	0
	HH34	11.5	98	65	33	22	10	16	1	12	4	0	26	4	3	0	0	0	0
	HH35	9.5	97	66	31	20	9	23	2	8	4	0	23	1	7	0	0	0	0
	HH36	9	96	66	30	35	6	21	0	4	0	0	22	6	2	0	0	0	0
	HH37	13.5	96	65	31	14	7	27	4	8	5	0	18	7	4	0	2	0	0
	HH38	11.5	97	68	29	29	8	11	1	13	6	0	18	7	4	0	0	0	0
HH-more-group	HH39	12	101	70	31	31	12	19	0	8	0	0	26	3	2	0	0	0	0
	HH40	9.5	93	65	28	23	16	16	0	9	1	0	24	2	2	0	0	0	0
HH-more-group	HH41	10	100	69	31	32	4	28	3	2	0	0	27	2	2	0	0	0	0
HH-more-group	HH42	10.5	100	68	32	27	4	24	2	9	2	0	20	8	4	0	0	0	0
	HH43	11	94	64	30	25	10	26	1	2	0	0	24	3	3	0	0	0	0
