# Supplementary material for: Bulked Segregant Analysis and Association Analysis Identified the Polymorphisms Related to the Intermuscular Bones in Common Carp (Cyprinus carpio)
Source: Biology (Basel). 2022 Mar 21;11(3):477. doi: 10.3390/biology11030477 (PMC8945855; doi:10.3390/biology11030477)
Supplement: Supplementary file 1 [file biology-11-00477-s001.zip › Supplementary-Table-S5.xlsx]

## Sheet: Enriched terms in HB strain
GO_Name	GO_ID	P_value	EnrichmentScore	HitsGenesCountsInSelectedSet	HitsGenesCountsInBackground	AllGenesCountsInSelectedSet	AllGenesCountsInBackground	GenesOfSelectedSetInGOterm
microtubule-based process	GO:0007017	2.04439e-06	1.93556	56	679	1052	24689	CAFS_CC_T_00068921,CAFS_CC_T_00082393,CAFS_CC_T_00190657,CAFS_CC_T_00005368,CAFS_CC_T_00157661,CAFS_CC_T_00033813,CAFS_CC_T_00015944,CAFS_CC_T_00050765,CAFS_CC_T_00228026,CAFS_CC_T_00105245,CAFS_CC_T_00104355,CAFS_CC_T_00140452,CAFS_CC_T_00045356,CAFS_CC_T_00132456,CAFS_CC_T_00101322,CAFS_CC_T_00156497,CAFS_CC_T_00040427,CAFS_CC_T_00226471,CAFS_CC_T_00049614,CAFS_CC_T_00038919,CAFS_CC_T_00014577,…
cytoskeleton	GO:0005856	3.57426e-06	1.59795	96	1432	1007	24003	CAFS_CC_T_00096152,CAFS_CC_T_00247673,CAFS_CC_T_00136710,CAFS_CC_T_00040142,CAFS_CC_T_00082393,CAFS_CC_T_00229821,CAFS_CC_T_00183970,CAFS_CC_T_00041872,CAFS_CC_T_00005368,CAFS_CC_T_00050389,CAFS_CC_T_00157661,CAFS_CC_T_00033813,CAFS_CC_T_00015944,CAFS_CC_T_00169238,CAFS_CC_T_00050765,CAFS_CC_T_00228026,CAFS_CC_T_00105245,CAFS_CC_T_00184038,CAFS_CC_T_00104355,CAFS_CC_T_00140452,CAFS_CC_T_00163525,…
Spemann organizer formation at the embryonic shield	GO:0060063	1.58357e-05	18.7749	4	5	1052	24689	CAFS_CC_T_00178602,CAFS_CC_T_00022154,CAFS_CC_T_00056368,CAFS_CC_T_00176310,
protein processing	GO:0016485	7.99934e-05	2.79759	18	151	1052	24689	CAFS_CC_T_00054759,CAFS_CC_T_00027101,CAFS_CC_T_00116727,CAFS_CC_T_00122241,CAFS_CC_T_00184922,CAFS_CC_T_00219739,CAFS_CC_T_00242497,CAFS_CC_T_00116010,CAFS_CC_T_00066142,CAFS_CC_T_00024314,CAFS_CC_T_00210168,CAFS_CC_T_00018899,CAFS_CC_T_00187714,CAFS_CC_T_00078436,CAFS_CC_T_00228820,CAFS_CC_T_00240544,CAFS_CC_T_00089042,CAFS_CC_T_00189625,
positive regulation of ATP-dependent activity	GO:0032781	0.000103464	13.4106	4	7	1052	24689	CAFS_CC_T_00041831,CAFS_CC_T_00225699,CAFS_CC_T_00161979,CAFS_CC_T_00101537,
microtubule-based movement	GO:0007018	0.000167864	2.18704	26	279	1052	24689	CAFS_CC_T_00068921,CAFS_CC_T_00190657,CAFS_CC_T_00005368,CAFS_CC_T_00157661,CAFS_CC_T_00033813,CAFS_CC_T_00228026,CAFS_CC_T_00140452,CAFS_CC_T_00045356,CAFS_CC_T_00101322,CAFS_CC_T_00156497,CAFS_CC_T_00226471,CAFS_CC_T_00049614,CAFS_CC_T_00038919,CAFS_CC_T_00104478,CAFS_CC_T_00197862,CAFS_CC_T_00068725,CAFS_CC_T_00060742,CAFS_CC_T_00135299,CAFS_CC_T_00165912,CAFS_CC_T_00161152,CAFS_CC_T_00137075,…
microtubule cytoskeleton	GO:0015630	0.000213146	1.68372	51	722	1007	24003	CAFS_CC_T_00082393,CAFS_CC_T_00229821,CAFS_CC_T_00005368,CAFS_CC_T_00157661,CAFS_CC_T_00033813,CAFS_CC_T_00015944,CAFS_CC_T_00050765,CAFS_CC_T_00228026,CAFS_CC_T_00104355,CAFS_CC_T_00140452,CAFS_CC_T_00163525,CAFS_CC_T_00045356,CAFS_CC_T_00132456,CAFS_CC_T_00101322,CAFS_CC_T_00040427,CAFS_CC_T_00226471,CAFS_CC_T_00049614,CAFS_CC_T_00038919,CAFS_CC_T_00243304,CAFS_CC_T_00159583,CAFS_CC_T_00014577,…
centrosome duplication	GO:0051298	0.000315574	4.06188	9	52	1052	24689	CAFS_CC_T_00082393,CAFS_CC_T_00156497,CAFS_CC_T_00040427,CAFS_CC_T_00068707,CAFS_CC_T_00176576,CAFS_CC_T_00060742,CAFS_CC_T_00200480,CAFS_CC_T_00189544,CAFS_CC_T_00079716,
exopeptidase activity	GO:0008238	0.000445236	2.70252	15	130	1062	24874	CAFS_CC_T_00099691,CAFS_CC_T_00224183,CAFS_CC_T_00039924,CAFS_CC_T_00169760,CAFS_CC_T_00240283,CAFS_CC_T_00242497,CAFS_CC_T_00066142,CAFS_CC_T_00024314,CAFS_CC_T_00050167,CAFS_CC_T_00018899,CAFS_CC_T_00200368,CAFS_CC_T_00187714,CAFS_CC_T_00073103,CAFS_CC_T_00240019,CAFS_CC_T_00219012,
microtubule cytoskeleton organization	GO:0000226	0.000456017	1.89168	32	397	1052	24689	CAFS_CC_T_00082393,CAFS_CC_T_00015944,CAFS_CC_T_00050765,CAFS_CC_T_00105245,CAFS_CC_T_00104355,CAFS_CC_T_00132456,CAFS_CC_T_00156497,CAFS_CC_T_00040427,CAFS_CC_T_00014577,CAFS_CC_T_00014566,CAFS_CC_T_00117302,CAFS_CC_T_00000389,CAFS_CC_T_00038972,CAFS_CC_T_00058530,CAFS_CC_T_00231382,CAFS_CC_T_00068707,CAFS_CC_T_00176576,CAFS_CC_T_00135676,CAFS_CC_T_00075833,CAFS_CC_T_00101447,CAFS_CC_T_00060742,…
epithelial cilium movement involved in extracellular fluid movement	GO:0003351	0.000489718	4.83178	7	34	1052	24689	CAFS_CC_T_00068921,CAFS_CC_T_00190657,CAFS_CC_T_00228026,CAFS_CC_T_00060742,CAFS_CC_T_00153576,CAFS_CC_T_00134931,CAFS_CC_T_00183067,
extracellular transport	GO:0006858	0.000489718	4.83178	7	34	1052	24689	CAFS_CC_T_00068921,CAFS_CC_T_00190657,CAFS_CC_T_00228026,CAFS_CC_T_00060742,CAFS_CC_T_00153576,CAFS_CC_T_00134931,CAFS_CC_T_00183067,
protein maturation	GO:0051604	0.000512275	2.34686	19	190	1052	24689	CAFS_CC_T_00054759,CAFS_CC_T_00027101,CAFS_CC_T_00116727,CAFS_CC_T_00122241,CAFS_CC_T_00184922,CAFS_CC_T_00219739,CAFS_CC_T_00242497,CAFS_CC_T_00116010,CAFS_CC_T_00066142,CAFS_CC_T_00024314,CAFS_CC_T_00210168,CAFS_CC_T_00018899,CAFS_CC_T_00187714,CAFS_CC_T_00078436,CAFS_CC_T_00228820,CAFS_CC_T_00042816,CAFS_CC_T_00240544,CAFS_CC_T_00089042,CAFS_CC_T_00189625,
regulation of centrosome duplication	GO:0010824	0.00052028	5.63247	6	25	1052	24689	CAFS_CC_T_00082393,CAFS_CC_T_00156497,CAFS_CC_T_00040427,CAFS_CC_T_00060742,CAFS_CC_T_00200480,CAFS_CC_T_00189544,
regulation of centrosome cycle	GO:0046605	0.00052028	5.63247	6	25	1052	24689	CAFS_CC_T_00082393,CAFS_CC_T_00156497,CAFS_CC_T_00040427,CAFS_CC_T_00060742,CAFS_CC_T_00200480,CAFS_CC_T_00189544,
basement membrane organization	GO:0071711	0.000560659	6.90254	5	17	1052	24689	CAFS_CC_T_00158251,CAFS_CC_T_00060815,CAFS_CC_T_00156578,CAFS_CC_T_00156162,CAFS_CC_T_00099280,
cytoskeletal protein binding	GO:0008092	0.000583478	1.52183	64	985	1062	24874	CAFS_CC_T_00247673,CAFS_CC_T_00136710,CAFS_CC_T_00189635,CAFS_CC_T_00183970,CAFS_CC_T_00005368,CAFS_CC_T_00050389,CAFS_CC_T_00157661,CAFS_CC_T_00015944,CAFS_CC_T_00169238,CAFS_CC_T_00105245,CAFS_CC_T_00201852,CAFS_CC_T_00184038,CAFS_CC_T_00104355,CAFS_CC_T_00140452,CAFS_CC_T_00045356,CAFS_CC_T_00131126,CAFS_CC_T_00051147,CAFS_CC_T_00030266,CAFS_CC_T_00176094,CAFS_CC_T_00123597,CAFS_CC_T_00226471,…
biological adhesion	GO:0022610	0.000644032	1.56644	56	839	1052	24689	CAFS_CC_T_00203621,CAFS_CC_T_00007941,CAFS_CC_T_00113661,CAFS_CC_T_00224190,CAFS_CC_T_00228563,CAFS_CC_T_00049383,CAFS_CC_T_00052562,CAFS_CC_T_00139894,CAFS_CC_T_00113695,CAFS_CC_T_00137665,CAFS_CC_T_00233839,CAFS_CC_T_00201852,CAFS_CC_T_00179910,CAFS_CC_T_00115474,CAFS_CC_T_00090376,CAFS_CC_T_00025303,CAFS_CC_T_00200560,CAFS_CC_T_00027084,CAFS_CC_T_00140511,CAFS_CC_T_00090290,CAFS_CC_T_00186747,…
microtubule motor activity	GO:0003777	0.000665013	2.60243	15	135	1062	24874	CAFS_CC_T_00005368,CAFS_CC_T_00157661,CAFS_CC_T_00033813,CAFS_CC_T_00228026,CAFS_CC_T_00140452,CAFS_CC_T_00045356,CAFS_CC_T_00226471,CAFS_CC_T_00049614,CAFS_CC_T_00038919,CAFS_CC_T_00197862,CAFS_CC_T_00135299,CAFS_CC_T_00165912,CAFS_CC_T_00161152,CAFS_CC_T_00137075,CAFS_CC_T_00245712,
microglia development	GO:0014005	0.000723183	14.0812	3	5	1052	24689	CAFS_CC_T_00234776,CAFS_CC_T_00154853,CAFS_CC_T_00033924,
action potential	GO:0001508	0.000776832	3.1103	11	83	1052	24689	CAFS_CC_T_00191107,CAFS_CC_T_00123826,CAFS_CC_T_00124742,CAFS_CC_T_00187062,CAFS_CC_T_00239161,CAFS_CC_T_00041831,CAFS_CC_T_00026888,CAFS_CC_T_00226653,CAFS_CC_T_00086838,CAFS_CC_T_00016959,CAFS_CC_T_00016932,
cilium	GO:0005929	0.000784126	2.0431	24	280	1007	24003	CAFS_CC_T_00060591,CAFS_CC_T_00005368,CAFS_CC_T_00033813,CAFS_CC_T_00182236,CAFS_CC_T_00006529,CAFS_CC_T_00156497,CAFS_CC_T_00244601,CAFS_CC_T_00159583,CAFS_CC_T_00161037,CAFS_CC_T_00165855,CAFS_CC_T_00104478,CAFS_CC_T_00103142,CAFS_CC_T_00054174,CAFS_CC_T_00058530,CAFS_CC_T_00228760,CAFS_CC_T_00101447,CAFS_CC_T_00135299,CAFS_CC_T_00081251,CAFS_CC_T_00137075,CAFS_CC_T_00068677,CAFS_CC_T_00177586,…
metalloexopeptidase activity	GO:0008235	0.000789787	3.1041	11	83	1062	24874	CAFS_CC_T_00099691,CAFS_CC_T_00224183,CAFS_CC_T_00169760,CAFS_CC_T_00240283,CAFS_CC_T_00242497,CAFS_CC_T_00066142,CAFS_CC_T_00024314,CAFS_CC_T_00018899,CAFS_CC_T_00200368,CAFS_CC_T_00187714,CAFS_CC_T_00073103,
neuron recognition	GO:0008038	0.00082604	3.57996	9	59	1052	24689	CAFS_CC_T_00034209,CAFS_CC_T_00173482,CAFS_CC_T_00075833,CAFS_CC_T_00100540,CAFS_CC_T_00223091,CAFS_CC_T_00119669,CAFS_CC_T_00022040,CAFS_CC_T_00121539,CAFS_CC_T_00152347,
regulation of ATP-dependent activity	GO:0043462	0.000850368	8.53405	4	11	1052	24689	CAFS_CC_T_00041831,CAFS_CC_T_00225699,CAFS_CC_T_00161979,CAFS_CC_T_00101537,
regulation of systemic arterial blood pressure by renin-angiotensin	GO:0003081	0.000850368	8.53405	4	11	1052	24689	CAFS_CC_T_00143101,CAFS_CC_T_00116010,CAFS_CC_T_00024314,CAFS_CC_T_00018899,
regulation of microtubule-based process	GO:0032886	0.000860089	3.07327	11	84	1052	24689	CAFS_CC_T_00082393,CAFS_CC_T_00015944,CAFS_CC_T_00156497,CAFS_CC_T_00040427,CAFS_CC_T_00014577,CAFS_CC_T_00000389,CAFS_CC_T_00135676,CAFS_CC_T_00075833,CAFS_CC_T_00060742,CAFS_CC_T_00200480,CAFS_CC_T_00189544,
axon choice point recognition	GO:0016198	0.000981334	6.17596	5	19	1052	24689	CAFS_CC_T_00034209,CAFS_CC_T_00173482,CAFS_CC_T_00100540,CAFS_CC_T_00121539,CAFS_CC_T_00152347,
SH3 domain binding	GO:0017124	0.00100272	5.01897	6	28	1062	24874	CAFS_CC_T_00042711,CAFS_CC_T_00184038,CAFS_CC_T_00035129,CAFS_CC_T_00126636,CAFS_CC_T_00156902,CAFS_CC_T_00167757,
cell adhesion	GO:0007155	0.00102613	1.54214	55	837	1052	24689	CAFS_CC_T_00203621,CAFS_CC_T_00007941,CAFS_CC_T_00113661,CAFS_CC_T_00224190,CAFS_CC_T_00228563,CAFS_CC_T_00049383,CAFS_CC_T_00052562,CAFS_CC_T_00139894,CAFS_CC_T_00113695,CAFS_CC_T_00137665,CAFS_CC_T_00233839,CAFS_CC_T_00201852,CAFS_CC_T_00179910,CAFS_CC_T_00115474,CAFS_CC_T_00090376,CAFS_CC_T_00025303,CAFS_CC_T_00200560,CAFS_CC_T_00027084,CAFS_CC_T_00140511,CAFS_CC_T_00090290,CAFS_CC_T_00186747,…
actin binding	GO:0003779	0.00136357	1.66688	39	548	1062	24874	CAFS_CC_T_00247673,CAFS_CC_T_00136710,CAFS_CC_T_00183970,CAFS_CC_T_00050389,CAFS_CC_T_00169238,CAFS_CC_T_00201852,CAFS_CC_T_00184038,CAFS_CC_T_00104355,CAFS_CC_T_00131126,CAFS_CC_T_00051147,CAFS_CC_T_00030266,CAFS_CC_T_00176094,CAFS_CC_T_00123597,CAFS_CC_T_00043966,CAFS_CC_T_00112009,CAFS_CC_T_00119994,CAFS_CC_T_00166750,CAFS_CC_T_00121811,CAFS_CC_T_00040380,CAFS_CC_T_00121882,CAFS_CC_T_00241724,…
regulation of systemic arterial blood pressure by circulatory renin-angiotensin	GO:0001991	0.00140047	11.7343	3	6	1052	24689	CAFS_CC_T_00116010,CAFS_CC_T_00024314,CAFS_CC_T_00018899,
regulation of angiotensin levels in blood	GO:0002002	0.00140047	11.7343	3	6	1052	24689	CAFS_CC_T_00116010,CAFS_CC_T_00024314,CAFS_CC_T_00018899,
angiotensin maturation	GO:0002003	0.00140047	11.7343	3	6	1052	24689	CAFS_CC_T_00116010,CAFS_CC_T_00024314,CAFS_CC_T_00018899,
cytoskeleton organization	GO:0007010	0.00166268	1.44031	68	1108	1052	24689	CAFS_CC_T_00247673,CAFS_CC_T_00129163,CAFS_CC_T_00082393,CAFS_CC_T_00065824,CAFS_CC_T_00183970,CAFS_CC_T_00143048,CAFS_CC_T_00015944,CAFS_CC_T_00169238,CAFS_CC_T_00050765,CAFS_CC_T_00105245,CAFS_CC_T_00201852,CAFS_CC_T_00184038,CAFS_CC_T_00221485,CAFS_CC_T_00164410,CAFS_CC_T_00104355,CAFS_CC_T_00132456,CAFS_CC_T_00156439,CAFS_CC_T_00051147,CAFS_CC_T_00151198,CAFS_CC_T_00030266,CAFS_CC_T_00123597,…
obsolete ciliary part	GO:0044441	0.00175839	23.8361	2	2	1007	24003	CAFS_CC_T_00163525,CAFS_CC_T_00201634,
lactone biosynthetic process	GO:1901336	0.00181397	23.4686	2	2	1052	24689	CAFS_CC_T_00225699,CAFS_CC_T_00101537,
lactone metabolic process	GO:1901334	0.00181397	23.4686	2	2	1052	24689	CAFS_CC_T_00225699,CAFS_CC_T_00101537,
cardiac muscle progenitor cell migration to the midline involved in heart field formation	GO:0003261	0.00181397	23.4686	2	2	1052	24689	CAFS_CC_T_00070532,CAFS_CC_T_00070089,
L-ascorbic acid metabolic process	GO:0019852	0.00181397	23.4686	2	2	1052	24689	CAFS_CC_T_00225699,CAFS_CC_T_00101537,
L-ascorbic acid biosynthetic process	GO:0019853	0.00181397	23.4686	2	2	1052	24689	CAFS_CC_T_00225699,CAFS_CC_T_00101537,
gluconolactonase activity	GO:0004341	0.00182124	23.4218	2	2	1062	24874	CAFS_CC_T_00225699,CAFS_CC_T_00101537,
centrosome cycle	GO:0007098	0.00186663	3.20027	9	66	1052	24689	CAFS_CC_T_00082393,CAFS_CC_T_00156497,CAFS_CC_T_00040427,CAFS_CC_T_00068707,CAFS_CC_T_00176576,CAFS_CC_T_00060742,CAFS_CC_T_00200480,CAFS_CC_T_00189544,CAFS_CC_T_00079716,
centriole assembly	GO:0098534	0.00199851	5.33378	5	22	1052	24689	CAFS_CC_T_00040427,CAFS_CC_T_00068707,CAFS_CC_T_00200480,CAFS_CC_T_00189544,CAFS_CC_T_00079716,
centriole replication	GO:0007099	0.00199851	5.33378	5	22	1052	24689	CAFS_CC_T_00040427,CAFS_CC_T_00068707,CAFS_CC_T_00200480,CAFS_CC_T_00189544,CAFS_CC_T_00079716,
axonal fasciculation	GO:0007413	0.00206445	4.40037	6	32	1052	24689	CAFS_CC_T_00075833,CAFS_CC_T_00100540,CAFS_CC_T_00223091,CAFS_CC_T_00119669,CAFS_CC_T_00022040,CAFS_CC_T_00152347,
neuron projection fasciculation	GO:0106030	0.00206445	4.40037	6	32	1052	24689	CAFS_CC_T_00075833,CAFS_CC_T_00100540,CAFS_CC_T_00223091,CAFS_CC_T_00119669,CAFS_CC_T_00022040,CAFS_CC_T_00152347,
determination of ventral identity	GO:0048264	0.00210288	3.82047	7	43	1052	24689	CAFS_CC_T_00034209,CAFS_CC_T_00178602,CAFS_CC_T_00232684,CAFS_CC_T_00056368,CAFS_CC_T_00181523,CAFS_CC_T_00176310,CAFS_CC_T_00154983,
regulation of membrane potential	GO:0042391	0.00210311	2.13351	18	198	1052	24689	CAFS_CC_T_00191107,CAFS_CC_T_00123826,CAFS_CC_T_00215631,CAFS_CC_T_00101685,CAFS_CC_T_00076923,CAFS_CC_T_00124742,CAFS_CC_T_00187062,CAFS_CC_T_00171124,CAFS_CC_T_00239161,CAFS_CC_T_00041831,CAFS_CC_T_00030266,CAFS_CC_T_00068746,CAFS_CC_T_00026888,CAFS_CC_T_00039703,CAFS_CC_T_00226653,CAFS_CC_T_00086838,CAFS_CC_T_00016959,CAFS_CC_T_00016932,
inflammasome complex	GO:0061702	0.00226946	10.2155	3	7	1007	24003	CAFS_CC_T_00234773,CAFS_CC_T_00037987,CAFS_CC_T_00108184,
cilium movement	GO:0003341	0.0022858	2.89736	10	81	1052	24689	CAFS_CC_T_00068921,CAFS_CC_T_00190657,CAFS_CC_T_00228026,CAFS_CC_T_00156497,CAFS_CC_T_00068725,CAFS_CC_T_00060742,CAFS_CC_T_00137075,CAFS_CC_T_00153576,CAFS_CC_T_00134931,CAFS_CC_T_00183067,
microtubule associated complex	GO:0005875	0.00234652	2.16692	17	187	1007	24003	CAFS_CC_T_00005368,CAFS_CC_T_00157661,CAFS_CC_T_00033813,CAFS_CC_T_00228026,CAFS_CC_T_00140452,CAFS_CC_T_00045356,CAFS_CC_T_00101322,CAFS_CC_T_00226471,CAFS_CC_T_00049614,CAFS_CC_T_00038919,CAFS_CC_T_00197862,CAFS_CC_T_00231382,CAFS_CC_T_00135299,CAFS_CC_T_00165912,CAFS_CC_T_00137075,CAFS_CC_T_00041930,CAFS_CC_T_00245712,
microglia differentiation	GO:0014004	0.00237322	10.058	3	7	1052	24689	CAFS_CC_T_00234776,CAFS_CC_T_00154853,CAFS_CC_T_00033924,
regulation of cell cycle process	GO:0010564	0.0025349	1.93374	22	267	1052	24689	CAFS_CC_T_00066739,CAFS_CC_T_00180822,CAFS_CC_T_00082393,CAFS_CC_T_00229821,CAFS_CC_T_00168308,CAFS_CC_T_00105245,CAFS_CC_T_00058185,CAFS_CC_T_00156497,CAFS_CC_T_00040427,CAFS_CC_T_00164916,CAFS_CC_T_00243304,CAFS_CC_T_00228141,CAFS_CC_T_00025684,CAFS_CC_T_00159178,CAFS_CC_T_00192660,CAFS_CC_T_00082185,CAFS_CC_T_00060742,CAFS_CC_T_00060787,CAFS_CC_T_00176632,CAFS_CC_T_00200480,CAFS_CC_T_00189544,…
cytoskeletal motor activity	GO:0003774	0.0028457	1.91554	22	269	1062	24874	CAFS_CC_T_00136710,CAFS_CC_T_00005368,CAFS_CC_T_00157661,CAFS_CC_T_00033813,CAFS_CC_T_00228026,CAFS_CC_T_00140452,CAFS_CC_T_00045356,CAFS_CC_T_00226471,CAFS_CC_T_00049614,CAFS_CC_T_00038919,CAFS_CC_T_00112009,CAFS_CC_T_00050642,CAFS_CC_T_00197862,CAFS_CC_T_00059387,CAFS_CC_T_00135299,CAFS_CC_T_00165912,CAFS_CC_T_00161152,CAFS_CC_T_00137075,CAFS_CC_T_00227949,CAFS_CC_T_00078422,CAFS_CC_T_00095339,…
microtubule-based transport	GO:0099111	0.00296236	2.5145	12	112	1052	24689	CAFS_CC_T_00068921,CAFS_CC_T_00190657,CAFS_CC_T_00157661,CAFS_CC_T_00033813,CAFS_CC_T_00228026,CAFS_CC_T_00104478,CAFS_CC_T_00060742,CAFS_CC_T_00153576,CAFS_CC_T_00245712,CAFS_CC_T_00134931,CAFS_CC_T_00183067,CAFS_CC_T_00076155,
enzyme regulator activity	GO:0030234	0.00299566	1.37356	77	1313	1062	24874	CAFS_CC_T_00065884,CAFS_CC_T_00018619,CAFS_CC_T_00189635,CAFS_CC_T_00009788,CAFS_CC_T_00157697,CAFS_CC_T_00041872,CAFS_CC_T_00052562,CAFS_CC_T_00150634,CAFS_CC_T_00094786,CAFS_CC_T_00219550,CAFS_CC_T_00035129,CAFS_CC_T_00164410,CAFS_CC_T_00102170,CAFS_CC_T_00129639,CAFS_CC_T_00143101,CAFS_CC_T_00042658,CAFS_CC_T_00051160,CAFS_CC_T_00223393,CAFS_CC_T_00066200,CAFS_CC_T_00230933,CAFS_CC_T_00204688,…
axon midline choice point recognition	GO:0016199	0.00306877	6.2583	4	15	1052	24689	CAFS_CC_T_00034209,CAFS_CC_T_00173482,CAFS_CC_T_00100540,CAFS_CC_T_00152347,
negative regulation of cell-cell adhesion	GO:0022408	0.00312765	3.57131	7	46	1052	24689	CAFS_CC_T_00052562,CAFS_CC_T_00090376,CAFS_CC_T_00243304,CAFS_CC_T_00008592,CAFS_CC_T_00070532,CAFS_CC_T_00222286,CAFS_CC_T_00070089,
transition metal ion binding	GO:0046914	0.00313534	1.27103	124	2285	1062	24874	CAFS_CC_T_00213429,CAFS_CC_T_00204934,CAFS_CC_T_00130141,CAFS_CC_T_00054759,CAFS_CC_T_00084153,CAFS_CC_T_00225874,CAFS_CC_T_00090898,CAFS_CC_T_00016437,CAFS_CC_T_00228932,CAFS_CC_T_00099691,CAFS_CC_T_00166181,CAFS_CC_T_00202382,CAFS_CC_T_00075619,CAFS_CC_T_00061015,CAFS_CC_T_00224183,CAFS_CC_T_00172471,CAFS_CC_T_00034655,CAFS_CC_T_00152828,CAFS_CC_T_00123491,CAFS_CC_T_00200569,CAFS_CC_T_00111990,…
non-membrane-bounded organelle	GO:0043228	0.00318512	1.24408	144	2759	1007	24003	CAFS_CC_T_00096152,CAFS_CC_T_00247673,CAFS_CC_T_00136710,CAFS_CC_T_00040142,CAFS_CC_T_00241902,CAFS_CC_T_00082393,CAFS_CC_T_00060588,CAFS_CC_T_00229821,CAFS_CC_T_00183970,CAFS_CC_T_00041872,CAFS_CC_T_00132374,CAFS_CC_T_00168308,CAFS_CC_T_00005368,CAFS_CC_T_00050389,CAFS_CC_T_00157661,CAFS_CC_T_00033813,CAFS_CC_T_00015944,CAFS_CC_T_00220971,CAFS_CC_T_00000442,CAFS_CC_T_00169238,CAFS_CC_T_00050765,…
intracellular non-membrane-bounded organelle	GO:0043232	0.00318512	1.24408	144	2759	1007	24003	CAFS_CC_T_00096152,CAFS_CC_T_00247673,CAFS_CC_T_00136710,CAFS_CC_T_00040142,CAFS_CC_T_00241902,CAFS_CC_T_00082393,CAFS_CC_T_00060588,CAFS_CC_T_00229821,CAFS_CC_T_00183970,CAFS_CC_T_00041872,CAFS_CC_T_00132374,CAFS_CC_T_00168308,CAFS_CC_T_00005368,CAFS_CC_T_00050389,CAFS_CC_T_00157661,CAFS_CC_T_00033813,CAFS_CC_T_00015944,CAFS_CC_T_00220971,CAFS_CC_T_00000442,CAFS_CC_T_00169238,CAFS_CC_T_00050765,…
meiotic chromosome segregation	GO:0045132	0.00331768	4.02319	6	35	1052	24689	CAFS_CC_T_00229821,CAFS_CC_T_00168308,CAFS_CC_T_00077224,CAFS_CC_T_00159178,CAFS_CC_T_00082185,CAFS_CC_T_00092242,
ATP hydrolysis activity	GO:0016887	0.00341914	2.20961	15	159	1062	24874	CAFS_CC_T_00082393,CAFS_CC_T_00005368,CAFS_CC_T_00157661,CAFS_CC_T_00033813,CAFS_CC_T_00228026,CAFS_CC_T_00140452,CAFS_CC_T_00045356,CAFS_CC_T_00049614,CAFS_CC_T_00197862,CAFS_CC_T_00246171,CAFS_CC_T_00165912,CAFS_CC_T_00082592,CAFS_CC_T_00137075,CAFS_CC_T_00182512,CAFS_CC_T_00240454,
peptidase activity	GO:0008233	0.00368581	1.3896	69	1163	1062	24874	CAFS_CC_T_00054759,CAFS_CC_T_00027101,CAFS_CC_T_00016437,CAFS_CC_T_00099691,CAFS_CC_T_00229821,CAFS_CC_T_00224183,CAFS_CC_T_00197798,CAFS_CC_T_00116727,CAFS_CC_T_00243639,CAFS_CC_T_00105628,CAFS_CC_T_00039924,CAFS_CC_T_00234773,CAFS_CC_T_00022258,CAFS_CC_T_00129291,CAFS_CC_T_00189765,CAFS_CC_T_00079509,CAFS_CC_T_00032444,CAFS_CC_T_00122241,CAFS_CC_T_00184922,CAFS_CC_T_00051593,CAFS_CC_T_00169760,…
membrane depolarization during action potential	GO:0086010	0.00379269	3.12915	8	60	1052	24689	CAFS_CC_T_00191107,CAFS_CC_T_00123826,CAFS_CC_T_00124742,CAFS_CC_T_00187062,CAFS_CC_T_00239161,CAFS_CC_T_00086838,CAFS_CC_T_00016959,CAFS_CC_T_00016932,
zinc ion binding	GO:0008270	0.0041697	1.28652	107	1948	1062	24874	CAFS_CC_T_00213429,CAFS_CC_T_00204934,CAFS_CC_T_00130141,CAFS_CC_T_00054759,CAFS_CC_T_00084153,CAFS_CC_T_00225874,CAFS_CC_T_00090898,CAFS_CC_T_00016437,CAFS_CC_T_00228932,CAFS_CC_T_00099691,CAFS_CC_T_00075619,CAFS_CC_T_00061015,CAFS_CC_T_00224183,CAFS_CC_T_00172471,CAFS_CC_T_00034655,CAFS_CC_T_00123491,CAFS_CC_T_00200569,CAFS_CC_T_00111990,CAFS_CC_T_00079970,CAFS_CC_T_00064004,CAFS_CC_T_00064000,…
epithelial structure maintenance	GO:0010669	0.00433555	4.5132	5	26	1052	24689	CAFS_CC_T_00075447,CAFS_CC_T_00192660,CAFS_CC_T_00133857,CAFS_CC_T_00099280,CAFS_CC_T_00021055,
purine nucleobase metabolic process	GO:0006144	0.00442104	3.80572	6	37	1052	24689	CAFS_CC_T_00060069,CAFS_CC_T_00081317,CAFS_CC_T_00196592,CAFS_CC_T_00192252,CAFS_CC_T_00066848,CAFS_CC_T_00098470,
metallopeptidase activity	GO:0008237	0.00474205	1.7584	25	333	1062	24874	CAFS_CC_T_00054759,CAFS_CC_T_00016437,CAFS_CC_T_00099691,CAFS_CC_T_00224183,CAFS_CC_T_00129291,CAFS_CC_T_00032444,CAFS_CC_T_00169760,CAFS_CC_T_00006096,CAFS_CC_T_00240283,CAFS_CC_T_00242497,CAFS_CC_T_00066142,CAFS_CC_T_00024314,CAFS_CC_T_00189464,CAFS_CC_T_00210168,CAFS_CC_T_00018899,CAFS_CC_T_00200368,CAFS_CC_T_00097684,CAFS_CC_T_00187714,CAFS_CC_T_00219939,CAFS_CC_T_00073103,CAFS_CC_T_00115703,…
epithelial cilium movement involved in determination of left/right asymmetry	GO:0060287	0.00499941	5.52203	4	17	1052	24689	CAFS_CC_T_00068921,CAFS_CC_T_00060742,CAFS_CC_T_00134931,CAFS_CC_T_00183067,
xanthine catabolic process	GO:0009115	0.00528759	15.6458	2	3	1052	24689	CAFS_CC_T_00192252,CAFS_CC_T_00066848,
xanthine metabolic process	GO:0046110	0.00528759	15.6458	2	3	1052	24689	CAFS_CC_T_00192252,CAFS_CC_T_00066848,
muscle alpha-actinin binding	GO:0051371	0.00530847	15.6146	2	3	1062	24874	CAFS_CC_T_00247673,CAFS_CC_T_00123597,
alpha-actinin binding	GO:0051393	0.00530847	15.6146	2	3	1062	24874	CAFS_CC_T_00247673,CAFS_CC_T_00123597,
actinin binding	GO:0042805	0.00530847	15.6146	2	3	1062	24874	CAFS_CC_T_00247673,CAFS_CC_T_00123597,
tyrosine metabolic process	GO:0006570	0.00534194	7.82288	3	9	1052	24689	CAFS_CC_T_00233029,CAFS_CC_T_00075651,CAFS_CC_T_00152481,
negative regulation of microtubule depolymerization	GO:0007026	0.00534194	7.82288	3	9	1052	24689	CAFS_CC_T_00015944,CAFS_CC_T_00014577,CAFS_CC_T_00135676,
tRNA modification	GO:0006400	0.00537495	2.74309	9	77	1052	24689	CAFS_CC_T_00061015,CAFS_CC_T_00058223,CAFS_CC_T_00076068,CAFS_CC_T_00015976,CAFS_CC_T_00154353,CAFS_CC_T_00171352,CAFS_CC_T_00185570,CAFS_CC_T_00121598,CAFS_CC_T_00016964,
serine-type peptidase activity	GO:0008236	0.0054708	1.84217	21	267	1062	24874	CAFS_CC_T_00027101,CAFS_CC_T_00197798,CAFS_CC_T_00116727,CAFS_CC_T_00039924,CAFS_CC_T_00189765,CAFS_CC_T_00184922,CAFS_CC_T_00051593,CAFS_CC_T_00115517,CAFS_CC_T_00152913,CAFS_CC_T_00242497,CAFS_CC_T_00066142,CAFS_CC_T_00050167,CAFS_CC_T_00004296,CAFS_CC_T_00187714,CAFS_CC_T_00070101,CAFS_CC_T_00078436,CAFS_CC_T_00037539,CAFS_CC_T_00246225,CAFS_CC_T_00165592,CAFS_CC_T_00074405,CAFS_CC_T_00240544,
histone methyltransferase activity	GO:0042054	0.00592763	2.70252	9	78	1062	24874	CAFS_CC_T_00119805,CAFS_CC_T_00034655,CAFS_CC_T_00064004,CAFS_CC_T_00192660,CAFS_CC_T_00050552,CAFS_CC_T_00108032,CAFS_CC_T_00223156,CAFS_CC_T_00096656,CAFS_CC_T_00019150,
activation of GTPase activity	GO:0090630	0.00621273	2.88845	8	65	1052	24689	CAFS_CC_T_00189635,CAFS_CC_T_00219550,CAFS_CC_T_00239238,CAFS_CC_T_00229089,CAFS_CC_T_00114728,CAFS_CC_T_00105433,CAFS_CC_T_00007242,CAFS_CC_T_00242267,
oligosaccharide-lipid intermediate biosynthetic process	GO:0006490	0.00621375	5.21525	4	18	1052	24689	CAFS_CC_T_00159023,CAFS_CC_T_00090625,CAFS_CC_T_00071889,CAFS_CC_T_00195387,
obsolete cell part	GO:0044464	0.00641434	3.14817	7	53	1007	24003	CAFS_CC_T_00151041,CAFS_CC_T_00051147,CAFS_CC_T_00062614,CAFS_CC_T_00091512,CAFS_CC_T_00225263,CAFS_CC_T_00104555,CAFS_CC_T_00212866,
serine hydrolase activity	GO:0017171	0.00645635	1.81498	21	271	1062	24874	CAFS_CC_T_00027101,CAFS_CC_T_00197798,CAFS_CC_T_00116727,CAFS_CC_T_00039924,CAFS_CC_T_00189765,CAFS_CC_T_00184922,CAFS_CC_T_00051593,CAFS_CC_T_00115517,CAFS_CC_T_00152913,CAFS_CC_T_00242497,CAFS_CC_T_00066142,CAFS_CC_T_00050167,CAFS_CC_T_00004296,CAFS_CC_T_00187714,CAFS_CC_T_00070101,CAFS_CC_T_00078436,CAFS_CC_T_00037539,CAFS_CC_T_00246225,CAFS_CC_T_00165592,CAFS_CC_T_00074405,CAFS_CC_T_00240544,
metallocarboxypeptidase activity	GO:0004181	0.00661544	3.51328	6	40	1062	24874	CAFS_CC_T_00240283,CAFS_CC_T_00242497,CAFS_CC_T_00066142,CAFS_CC_T_00018899,CAFS_CC_T_00200368,CAFS_CC_T_00187714,
membrane depolarization	GO:0051899	0.00681219	2.84468	8	66	1052	24689	CAFS_CC_T_00191107,CAFS_CC_T_00123826,CAFS_CC_T_00124742,CAFS_CC_T_00187062,CAFS_CC_T_00239161,CAFS_CC_T_00086838,CAFS_CC_T_00016959,CAFS_CC_T_00016932,
negative regulation of cell adhesion	GO:0007162	0.00681219	2.84468	8	66	1052	24689	CAFS_CC_T_00228563,CAFS_CC_T_00052562,CAFS_CC_T_00090376,CAFS_CC_T_00243304,CAFS_CC_T_00008592,CAFS_CC_T_00070532,CAFS_CC_T_00222286,CAFS_CC_T_00070089,
microtubule organizing center organization	GO:0031023	0.00690378	2.64022	9	80	1052	24689	CAFS_CC_T_00082393,CAFS_CC_T_00156497,CAFS_CC_T_00040427,CAFS_CC_T_00068707,CAFS_CC_T_00176576,CAFS_CC_T_00060742,CAFS_CC_T_00200480,CAFS_CC_T_00189544,CAFS_CC_T_00079716,
nucleoside-triphosphatase regulator activity	GO:0060589	0.00718719	1.48598	42	662	1062	24874	CAFS_CC_T_00065884,CAFS_CC_T_00018619,CAFS_CC_T_00189635,CAFS_CC_T_00009788,CAFS_CC_T_00150634,CAFS_CC_T_00094786,CAFS_CC_T_00219550,CAFS_CC_T_00164410,CAFS_CC_T_00051160,CAFS_CC_T_00066200,CAFS_CC_T_00230933,CAFS_CC_T_00204688,CAFS_CC_T_00095150,CAFS_CC_T_00102245,CAFS_CC_T_00160127,CAFS_CC_T_00239238,CAFS_CC_T_00124006,CAFS_CC_T_00117336,CAFS_CC_T_00228171,CAFS_CC_T_00229089,CAFS_CC_T_00194379,…
GTPase regulator activity	GO:0030695	0.00718719	1.48598	42	662	1062	24874	CAFS_CC_T_00065884,CAFS_CC_T_00018619,CAFS_CC_T_00189635,CAFS_CC_T_00009788,CAFS_CC_T_00150634,CAFS_CC_T_00094786,CAFS_CC_T_00219550,CAFS_CC_T_00164410,CAFS_CC_T_00051160,CAFS_CC_T_00066200,CAFS_CC_T_00230933,CAFS_CC_T_00204688,CAFS_CC_T_00095150,CAFS_CC_T_00102245,CAFS_CC_T_00160127,CAFS_CC_T_00239238,CAFS_CC_T_00124006,CAFS_CC_T_00117336,CAFS_CC_T_00228171,CAFS_CC_T_00229089,CAFS_CC_T_00194379,…
cell recognition	GO:0008037	0.00810171	2.21751	12	127	1052	24689	CAFS_CC_T_00034209,CAFS_CC_T_00173482,CAFS_CC_T_00075833,CAFS_CC_T_00100540,CAFS_CC_T_00223091,CAFS_CC_T_00243433,CAFS_CC_T_00119669,CAFS_CC_T_00022040,CAFS_CC_T_00121539,CAFS_CC_T_00158426,CAFS_CC_T_00152347,CAFS_CC_T_00121611,
histone-lysine N-methyltransferase activity	GO:0018024	0.00861671	2.98096	7	55	1062	24874	CAFS_CC_T_00034655,CAFS_CC_T_00064004,CAFS_CC_T_00192660,CAFS_CC_T_00050552,CAFS_CC_T_00223156,CAFS_CC_T_00096656,CAFS_CC_T_00019150,
cell-cell adhesion	GO:0098609	0.00883389	1.5893	30	443	1052	24689	CAFS_CC_T_00113661,CAFS_CC_T_00052562,CAFS_CC_T_00113695,CAFS_CC_T_00233839,CAFS_CC_T_00179910,CAFS_CC_T_00115474,CAFS_CC_T_00090376,CAFS_CC_T_00200560,CAFS_CC_T_00027084,CAFS_CC_T_00090290,CAFS_CC_T_00186747,CAFS_CC_T_00243304,CAFS_CC_T_00228141,CAFS_CC_T_00014566,CAFS_CC_T_00098114,CAFS_CC_T_00150847,CAFS_CC_T_00203006,CAFS_CC_T_00243433,CAFS_CC_T_00008592,CAFS_CC_T_00070532,CAFS_CC_T_00009805,…
regulation of organelle organization	GO:0033043	0.00903875	1.53744	34	519	1052	24689	CAFS_CC_T_00189635,CAFS_CC_T_00082393,CAFS_CC_T_00015944,CAFS_CC_T_00219550,CAFS_CC_T_00105245,CAFS_CC_T_00104355,CAFS_CC_T_00030266,CAFS_CC_T_00156497,CAFS_CC_T_00040427,CAFS_CC_T_00095150,CAFS_CC_T_00239238,CAFS_CC_T_00243304,CAFS_CC_T_00014577,CAFS_CC_T_00025684,CAFS_CC_T_00159178,CAFS_CC_T_00000389,CAFS_CC_T_00219263,CAFS_CC_T_00241724,CAFS_CC_T_00135676,CAFS_CC_T_00075833,CAFS_CC_T_00156595,…
tRNA metabolic process	GO:0006399	0.00913278	1.89084	17	211	1052	24689	CAFS_CC_T_00061015,CAFS_CC_T_00058223,CAFS_CC_T_00219561,CAFS_CC_T_00123491,CAFS_CC_T_00076068,CAFS_CC_T_00015976,CAFS_CC_T_00244388,CAFS_CC_T_00154353,CAFS_CC_T_00190033,CAFS_CC_T_00082140,CAFS_CC_T_00171352,CAFS_CC_T_00052717,CAFS_CC_T_00185570,CAFS_CC_T_00121598,CAFS_CC_T_00040212,CAFS_CC_T_00105528,CAFS_CC_T_00016964,
Spemann organizer formation	GO:0060061	0.00919561	4.69373	4	20	1052	24689	CAFS_CC_T_00178602,CAFS_CC_T_00022154,CAFS_CC_T_00056368,CAFS_CC_T_00176310,
tRNA methylation	GO:0030488	0.00919561	4.69373	4	20	1052	24689	CAFS_CC_T_00058223,CAFS_CC_T_00185570,CAFS_CC_T_00121598,CAFS_CC_T_00016964,
basement membrane	GO:0005604	0.00943258	6.50077	3	11	1007	24003	CAFS_CC_T_00233839,CAFS_CC_T_00158251,CAFS_CC_T_00156162,
microtubule binding	GO:0008017	0.00956821	1.75039	21	281	1062	24874	CAFS_CC_T_00005368,CAFS_CC_T_00157661,CAFS_CC_T_00015944,CAFS_CC_T_00105245,CAFS_CC_T_00104355,CAFS_CC_T_00140452,CAFS_CC_T_00045356,CAFS_CC_T_00226471,CAFS_CC_T_00038919,CAFS_CC_T_00014577,CAFS_CC_T_00117302,CAFS_CC_T_00197862,CAFS_CC_T_00135676,CAFS_CC_T_00135299,CAFS_CC_T_00229558,CAFS_CC_T_00165912,CAFS_CC_T_00161152,CAFS_CC_T_00091455,CAFS_CC_T_00120681,CAFS_CC_T_00245712,CAFS_CC_T_00186531,
monosaccharide metabolic process	GO:0005996	0.00968054	2.16634	12	130	1052	24689	CAFS_CC_T_00166518,CAFS_CC_T_00018963,CAFS_CC_T_00229503,CAFS_CC_T_00103136,CAFS_CC_T_00225699,CAFS_CC_T_00136989,CAFS_CC_T_00053150,CAFS_CC_T_00171420,CAFS_CC_T_00093153,CAFS_CC_T_00137944,CAFS_CC_T_00101537,CAFS_CC_T_00081536,
regulation of centriole replication	GO:0046599	0.00984421	6.40054	3	11	1052	24689	CAFS_CC_T_00040427,CAFS_CC_T_00200480,CAFS_CC_T_00189544,
mannose metabolic process	GO:0006013	0.00984421	6.40054	3	11	1052	24689	CAFS_CC_T_00018963,CAFS_CC_T_00136989,CAFS_CC_T_00081536,
deuterosome	GO:0098536	0.00997053	11.9181	2	4	1007	24003	CAFS_CC_T_00040427,CAFS_CC_T_00068707,
UDP-N-acetylglucosamine transferase complex	GO:0043541	0.00997053	11.9181	2	4	1007	24003	CAFS_CC_T_00071889,CAFS_CC_T_00195387,
muscle myosin complex	GO:0005859	0.00997053	11.9181	2	4	1007	24003	CAFS_CC_T_00247673,CAFS_CC_T_00123597,
tRNA-specific adenosine deaminase activity	GO:0008251	0.0103164	11.7109	2	4	1062	24874	CAFS_CC_T_00061015,CAFS_CC_T_00081317,
structural constituent of muscle	GO:0008307	0.0103164	11.7109	2	4	1062	24874	CAFS_CC_T_00247673,CAFS_CC_T_00123597,
o-hydroxylaminobenzoate mutase activity	GO:0034951	0.0103164	11.7109	2	4	1062	24874	CAFS_CC_T_00076068,CAFS_CC_T_00015976,
baruol synthase activity	GO:0080011	0.0103164	11.7109	2	4	1062	24874	CAFS_CC_T_00076068,CAFS_CC_T_00015976,
gamma-glutamyl carboxylase activity	GO:0008488	0.0103164	11.7109	2	4	1062	24874	CAFS_CC_T_00208063,CAFS_CC_T_00011632,
oxidoreductase activity, acting on CH or CH2 groups, oxygen as acceptor	GO:0016727	0.0103164	11.7109	2	4	1062	24874	CAFS_CC_T_00192252,CAFS_CC_T_00066848,
N-acetylglucosaminyldiphosphodolichol N-acetylglucosaminyltransferase activity	GO:0004577	0.0103164	11.7109	2	4	1062	24874	CAFS_CC_T_00071889,CAFS_CC_T_00195387,
protein self-association	GO:0043621	0.0103164	11.7109	2	4	1062	24874	CAFS_CC_T_00041831,CAFS_CC_T_00133857,
2,5-diamino-6-ribitylamino-4(3H)-pyrimidinone 5'-phosphate deaminase activity	GO:0043723	0.0103164	11.7109	2	4	1062	24874	CAFS_CC_T_00061015,CAFS_CC_T_00081317,
xanthine oxidase activity	GO:0004855	0.0103164	11.7109	2	4	1062	24874	CAFS_CC_T_00192252,CAFS_CC_T_00066848,
tRNA-specific adenosine-37 deaminase activity	GO:0043829	0.0103164	11.7109	2	4	1062	24874	CAFS_CC_T_00061015,CAFS_CC_T_00081317,
lupeol synthase activity	GO:0042299	0.0103164	11.7109	2	4	1062	24874	CAFS_CC_T_00076068,CAFS_CC_T_00015976,
beta-amyrin synthase activity	GO:0042300	0.0103164	11.7109	2	4	1062	24874	CAFS_CC_T_00076068,CAFS_CC_T_00015976,
Pyrin domain binding	GO:0032090	0.0103164	11.7109	2	4	1062	24874	CAFS_CC_T_00037987,CAFS_CC_T_00108184,
tRNA-specific adenosine-34 deaminase activity	GO:0052717	0.0103164	11.7109	2	4	1062	24874	CAFS_CC_T_00061015,CAFS_CC_T_00081317,
archaeal-specific GTP cyclohydrolase activity	GO:0044682	0.0103164	11.7109	2	4	1062	24874	CAFS_CC_T_00061015,CAFS_CC_T_00081317,
N-cyclopropylmelamine deaminase activity	GO:0034547	0.0103164	11.7109	2	4	1062	24874	CAFS_CC_T_00061015,CAFS_CC_T_00081317,
N-cyclopropylammeline deaminase activity	GO:0034548	0.0103164	11.7109	2	4	1062	24874	CAFS_CC_T_00061015,CAFS_CC_T_00081317,
N-cyclopropylammelide alkylamino hydrolase activity	GO:0034549	0.0103164	11.7109	2	4	1062	24874	CAFS_CC_T_00061015,CAFS_CC_T_00081317,
pivalyl-CoA mutase activity	GO:0034784	0.0103164	11.7109	2	4	1062	24874	CAFS_CC_T_00076068,CAFS_CC_T_00015976,
nucleobase metabolic process	GO:0009112	0.0103276	2.88211	7	57	1052	24689	CAFS_CC_T_00239176,CAFS_CC_T_00060069,CAFS_CC_T_00081317,CAFS_CC_T_00196592,CAFS_CC_T_00192252,CAFS_CC_T_00066848,CAFS_CC_T_00098470,
glomerular visceral epithelial cell development	GO:0072015	0.0107563	3.66697	5	32	1052	24689	CAFS_CC_T_00208426,CAFS_CC_T_00032297,CAFS_CC_T_00227949,CAFS_CC_T_00062002,CAFS_CC_T_00220850,
glomerular epithelial cell development	GO:0072310	0.0107563	3.66697	5	32	1052	24689	CAFS_CC_T_00208426,CAFS_CC_T_00032297,CAFS_CC_T_00227949,CAFS_CC_T_00062002,CAFS_CC_T_00220850,
high voltage-gated calcium channel activity	GO:0008331	0.0108439	3.65966	5	32	1062	24874	CAFS_CC_T_00191107,CAFS_CC_T_00187062,CAFS_CC_T_00239161,CAFS_CC_T_00086838,CAFS_CC_T_00016959,
movement of cell or subcellular component	GO:0006928	0.0111984	1.27903	86	1578	1052	24689	CAFS_CC_T_00068921,CAFS_CC_T_00215614,CAFS_CC_T_00051260,CAFS_CC_T_00040142,CAFS_CC_T_00018619,CAFS_CC_T_00053009,CAFS_CC_T_00065824,CAFS_CC_T_00088921,CAFS_CC_T_00190657,CAFS_CC_T_00075654,CAFS_CC_T_00228563,CAFS_CC_T_00005364,CAFS_CC_T_00168308,CAFS_CC_T_00005368,CAFS_CC_T_00157661,CAFS_CC_T_00033813,CAFS_CC_T_00015944,CAFS_CC_T_00034209,CAFS_CC_T_00113695,CAFS_CC_T_00228026,CAFS_CC_T_00041831,…
organelle organization	GO:0006996	0.0113381	1.19967	144	2817	1052	24689	CAFS_CC_T_00247673,CAFS_CC_T_00129163,CAFS_CC_T_00068921,CAFS_CC_T_00054759,CAFS_CC_T_00027559,CAFS_CC_T_00189635,CAFS_CC_T_00082393,CAFS_CC_T_00065824,CAFS_CC_T_00229821,CAFS_CC_T_00027182,CAFS_CC_T_00183970,CAFS_CC_T_00041872,CAFS_CC_T_00132374,CAFS_CC_T_00168308,CAFS_CC_T_00005368,CAFS_CC_T_00143048,CAFS_CC_T_00201093,CAFS_CC_T_00215239,CAFS_CC_T_00221904,CAFS_CC_T_00033813,CAFS_CC_T_00015944,…
hydrolase activity	GO:0016787	0.0113755	1.17373	178	3552	1062	24874	CAFS_CC_T_00166592,CAFS_CC_T_00054759,CAFS_CC_T_00027101,CAFS_CC_T_00158924,CAFS_CC_T_00016437,CAFS_CC_T_00180822,CAFS_CC_T_00166518,CAFS_CC_T_00099691,CAFS_CC_T_00239659,CAFS_CC_T_00101673,CAFS_CC_T_00082393,CAFS_CC_T_00065824,CAFS_CC_T_00229821,CAFS_CC_T_00061015,CAFS_CC_T_00123893,CAFS_CC_T_00229893,CAFS_CC_T_00005364,CAFS_CC_T_00005368,CAFS_CC_T_00178596,CAFS_CC_T_00018672,CAFS_CC_T_00066713,…
actin filament binding	GO:0051015	0.011931	1.97534	14	166	1062	24874	CAFS_CC_T_00247673,CAFS_CC_T_00136710,CAFS_CC_T_00169238,CAFS_CC_T_00131126,CAFS_CC_T_00030266,CAFS_CC_T_00123597,CAFS_CC_T_00121882,CAFS_CC_T_00156595,CAFS_CC_T_00231411,CAFS_CC_T_00026888,CAFS_CC_T_00227949,CAFS_CC_T_00078422,CAFS_CC_T_00062002,CAFS_CC_T_00041930,
determination of dorsal/ventral asymmetry	GO:0048262	0.0123059	2.5719	8	73	1052	24689	CAFS_CC_T_00034209,CAFS_CC_T_00178602,CAFS_CC_T_00170756,CAFS_CC_T_00232684,CAFS_CC_T_00056368,CAFS_CC_T_00181523,CAFS_CC_T_00176310,CAFS_CC_T_00154983,
regulation of cell-cell adhesion mediated by cadherin	GO:2000047	0.0127147	5.86716	3	12	1052	24689	CAFS_CC_T_00243304,CAFS_CC_T_00009805,CAFS_CC_T_00129929,
purine nucleoside biosynthetic process	GO:0042451	0.0127147	5.86716	3	12	1052	24689	CAFS_CC_T_00081317,CAFS_CC_T_00196592,CAFS_CC_T_00008600,
purine ribonucleoside biosynthetic process	GO:0046129	0.0127147	5.86716	3	12	1052	24689	CAFS_CC_T_00081317,CAFS_CC_T_00196592,CAFS_CC_T_00008600,
oxidative demethylation	GO:0070989	0.0127147	5.86716	3	12	1052	24689	CAFS_CC_T_00081407,CAFS_CC_T_00008592,CAFS_CC_T_00222286,
regulation of microtubule depolymerization	GO:0031114	0.0127147	5.86716	3	12	1052	24689	CAFS_CC_T_00015944,CAFS_CC_T_00014577,CAFS_CC_T_00135676,
cell morphogenesis	GO:0000902	0.0128587	1.35396	57	988	1052	24689	CAFS_CC_T_00247673,CAFS_CC_T_00134996,CAFS_CC_T_00215614,CAFS_CC_T_00040142,CAFS_CC_T_00191952,CAFS_CC_T_00065824,CAFS_CC_T_00075654,CAFS_CC_T_00228563,CAFS_CC_T_00005364,CAFS_CC_T_00168308,CAFS_CC_T_00034209,CAFS_CC_T_00230301,CAFS_CC_T_00090376,CAFS_CC_T_00201896,CAFS_CC_T_00140452,CAFS_CC_T_00131126,CAFS_CC_T_00051147,CAFS_CC_T_00117267,CAFS_CC_T_00006529,CAFS_CC_T_00123597,CAFS_CC_T_00226471,…
cilium assembly	GO:0060271	0.013017	1.67633	22	308	1052	24689	CAFS_CC_T_00068921,CAFS_CC_T_00005368,CAFS_CC_T_00033813,CAFS_CC_T_00051147,CAFS_CC_T_00006529,CAFS_CC_T_00156497,CAFS_CC_T_00095150,CAFS_CC_T_00165855,CAFS_CC_T_00104478,CAFS_CC_T_00065280,CAFS_CC_T_00058530,CAFS_CC_T_00101832,CAFS_CC_T_00166338,CAFS_CC_T_00040380,CAFS_CC_T_00101447,CAFS_CC_T_00139661,CAFS_CC_T_00201634,CAFS_CC_T_00176632,CAFS_CC_T_00177586,CAFS_CC_T_00153576,CAFS_CC_T_00045404,…
plus-end-directed microtubule motor activity	GO:0008574	0.0130677	4.25852	4	22	1062	24874	CAFS_CC_T_00226471,CAFS_CC_T_00038919,CAFS_CC_T_00135299,CAFS_CC_T_00245712,
meiotic cell cycle process	GO:1903046	0.013516	2.37323	9	89	1052	24689	CAFS_CC_T_00229821,CAFS_CC_T_00168308,CAFS_CC_T_00220971,CAFS_CC_T_00077224,CAFS_CC_T_00025684,CAFS_CC_T_00159178,CAFS_CC_T_00082185,CAFS_CC_T_00190106,CAFS_CC_T_00092242,
cell-cell adhesion via plasma-membrane adhesion molecules	GO:0098742	0.0145809	1.79715	17	222	1052	24689	CAFS_CC_T_00113661,CAFS_CC_T_00113695,CAFS_CC_T_00233839,CAFS_CC_T_00179910,CAFS_CC_T_00115474,CAFS_CC_T_00027084,CAFS_CC_T_00186747,CAFS_CC_T_00014566,CAFS_CC_T_00098114,CAFS_CC_T_00150847,CAFS_CC_T_00243433,CAFS_CC_T_00008916,CAFS_CC_T_00030010,CAFS_CC_T_00158426,CAFS_CC_T_00129929,CAFS_CC_T_00148667,CAFS_CC_T_00121611,
protein depolymerization	GO:0051261	0.0147339	2.69312	7	61	1052	24689	CAFS_CC_T_00015944,CAFS_CC_T_00030266,CAFS_CC_T_00043966,CAFS_CC_T_00014577,CAFS_CC_T_00135676,CAFS_CC_T_00156595,CAFS_CC_T_00078941,
regulation of vesicle fusion	GO:0031338	0.0147339	2.69312	7	61	1052	24689	CAFS_CC_T_00189635,CAFS_CC_T_00219550,CAFS_CC_T_00239238,CAFS_CC_T_00114728,CAFS_CC_T_00105433,CAFS_CC_T_00007242,CAFS_CC_T_00242267,
carboxypeptidase activity	GO:0004180	0.0148828	2.68775	7	61	1062	24874	CAFS_CC_T_00240283,CAFS_CC_T_00242497,CAFS_CC_T_00066142,CAFS_CC_T_00018899,CAFS_CC_T_00200368,CAFS_CC_T_00187714,CAFS_CC_T_00073103,
RNA modification	GO:0009451	0.0150649	2.04075	12	138	1052	24689	CAFS_CC_T_00061015,CAFS_CC_T_00058223,CAFS_CC_T_00123491,CAFS_CC_T_00076068,CAFS_CC_T_00015976,CAFS_CC_T_00154353,CAFS_CC_T_00171352,CAFS_CC_T_00185570,CAFS_CC_T_00233385,CAFS_CC_T_00121598,CAFS_CC_T_00197198,CAFS_CC_T_00016964,
regulation of systemic arterial blood pressure by hormone	GO:0001990	0.0151929	4.0815	4	23	1052	24689	CAFS_CC_T_00143101,CAFS_CC_T_00116010,CAFS_CC_T_00024314,CAFS_CC_T_00018899,
fucosidase activity	GO:0015928	0.0152953	4.07336	4	23	1062	24874	CAFS_CC_T_00168382,CAFS_CC_T_00018963,CAFS_CC_T_00136989,CAFS_CC_T_00171420,
N-methyltransferase activity	GO:0008170	0.0154125	2.11181	11	122	1062	24874	CAFS_CC_T_00119805,CAFS_CC_T_00058223,CAFS_CC_T_00034655,CAFS_CC_T_00064004,CAFS_CC_T_00192660,CAFS_CC_T_00050552,CAFS_CC_T_00108032,CAFS_CC_T_00223156,CAFS_CC_T_00096656,CAFS_CC_T_00019150,CAFS_CC_T_00016964,
peptide catabolic process	GO:0043171	0.0156192	3.35266	5	35	1052	24689	CAFS_CC_T_00099691,CAFS_CC_T_00224183,CAFS_CC_T_00169760,CAFS_CC_T_00024314,CAFS_CC_T_00073103,
collagen metabolic process	GO:0032963	0.0160129	5.41584	3	13	1052	24689	CAFS_CC_T_00156062,CAFS_CC_T_00243304,CAFS_CC_T_00019317,
termination of RNA polymerase II transcription	GO:0006369	0.0160129	5.41584	3	13	1052	24689	CAFS_CC_T_00049744,CAFS_CC_T_00063019,CAFS_CC_T_00019227,
dolichol-linked oligosaccharide biosynthetic process	GO:0006488	0.0160129	5.41584	3	13	1052	24689	CAFS_CC_T_00090625,CAFS_CC_T_00071889,CAFS_CC_T_00195387,
negative regulation of microtubule polymerization or depolymerization	GO:0031111	0.0160129	5.41584	3	13	1052	24689	CAFS_CC_T_00015944,CAFS_CC_T_00014577,CAFS_CC_T_00135676,
PRC1 complex	GO:0035102	0.016157	9.53446	2	5	1007	24003	CAFS_CC_T_00196477,CAFS_CC_T_00073342,
IPAF inflammasome complex	GO:0072557	0.016157	9.53446	2	5	1007	24003	CAFS_CC_T_00234773,CAFS_CC_T_00108184,
NLRP3 inflammasome complex	GO:0072559	0.016157	9.53446	2	5	1007	24003	CAFS_CC_T_00234773,CAFS_CC_T_00108184,
AIM2 inflammasome complex	GO:0097169	0.016157	9.53446	2	5	1007	24003	CAFS_CC_T_00234773,CAFS_CC_T_00108184,
axolemma	GO:0030673	0.016157	9.53446	2	5	1007	24003	CAFS_CC_T_00100540,CAFS_CC_T_00152347,
mRNA destabilization-mediated gene silencing	GO:0098795	0.0166452	9.38745	2	5	1052	24689	CAFS_CC_T_00241902,CAFS_CC_T_00117895,
regulation of cardiac muscle cell action potential	GO:0098901	0.0166452	9.38745	2	5	1052	24689	CAFS_CC_T_00041831,CAFS_CC_T_00226653,
regulation of nuclear-transcribed mRNA catabolic process, nonsense-mediated decay	GO:2000622	0.0166452	9.38745	2	5	1052	24689	CAFS_CC_T_00045274,CAFS_CC_T_00060721,
negative regulation of nuclear-transcribed mRNA catabolic process, nonsense-mediated decay	GO:2000623	0.0166452	9.38745	2	5	1052	24689	CAFS_CC_T_00045274,CAFS_CC_T_00060721,
hypoxanthine salvage	GO:0043103	0.0166452	9.38745	2	5	1052	24689	CAFS_CC_T_00081317,CAFS_CC_T_00196592,
desmosome assembly	GO:0002159	0.0166452	9.38745	2	5	1052	24689	CAFS_CC_T_00049383,CAFS_CC_T_00179910,
miRNA-mediated gene silencing by mRNA destabilization	GO:0035279	0.0166452	9.38745	2	5	1052	24689	CAFS_CC_T_00241902,CAFS_CC_T_00117895,
hypoxanthine biosynthetic process	GO:0046101	0.0166452	9.38745	2	5	1052	24689	CAFS_CC_T_00081317,CAFS_CC_T_00196592,
inosine metabolic process	GO:0046102	0.0166452	9.38745	2	5	1052	24689	CAFS_CC_T_00081317,CAFS_CC_T_00196592,
inosine biosynthetic process	GO:0046103	0.0166452	9.38745	2	5	1052	24689	CAFS_CC_T_00081317,CAFS_CC_T_00196592,
purine ribonucleoside catabolic process	GO:0046130	0.0166452	9.38745	2	5	1052	24689	CAFS_CC_T_00081317,CAFS_CC_T_00196592,
adenosine catabolic process	GO:0006154	0.0166452	9.38745	2	5	1052	24689	CAFS_CC_T_00081317,CAFS_CC_T_00196592,
prolyl-tRNA aminoacylation	GO:0006433	0.0166452	9.38745	2	5	1052	24689	CAFS_CC_T_00040212,CAFS_CC_T_00105528,
oligopeptide binding	GO:1900750	0.016709	9.36874	2	5	1062	24874	CAFS_CC_T_00239631,CAFS_CC_T_00115709,
gamma-catenin binding	GO:0045295	0.016709	9.36874	2	5	1062	24874	CAFS_CC_T_00015944,CAFS_CC_T_00135676,
glutathione binding	GO:0043295	0.016709	9.36874	2	5	1062	24874	CAFS_CC_T_00239631,CAFS_CC_T_00115709,
oxidoreductase activity, acting on CH or CH2 groups, NAD or NADP as acceptor	GO:0016726	0.016709	9.36874	2	5	1062	24874	CAFS_CC_T_00192252,CAFS_CC_T_00066848,
proline-tRNA ligase activity	GO:0004827	0.016709	9.36874	2	5	1062	24874	CAFS_CC_T_00040212,CAFS_CC_T_00105528,
xanthine dehydrogenase activity	GO:0004854	0.016709	9.36874	2	5	1062	24874	CAFS_CC_T_00192252,CAFS_CC_T_00066848,
peptidyl-proline 3-dioxygenase activity	GO:0031544	0.016709	9.36874	2	5	1062	24874	CAFS_CC_T_00156062,CAFS_CC_T_00019317,
oxidosqualene cyclase activity	GO:0031559	0.016709	9.36874	2	5	1062	24874	CAFS_CC_T_00076068,CAFS_CC_T_00015976,
procollagen-proline 3-dioxygenase activity	GO:0019797	0.016709	9.36874	2	5	1062	24874	CAFS_CC_T_00156062,CAFS_CC_T_00019317,
specification of symmetry	GO:0009799	0.0172524	1.49697	31	486	1052	24689	CAFS_CC_T_00068921,CAFS_CC_T_00076923,CAFS_CC_T_00034209,CAFS_CC_T_00178602,CAFS_CC_T_00051147,CAFS_CC_T_00170756,CAFS_CC_T_00095150,CAFS_CC_T_00244601,CAFS_CC_T_00022592,CAFS_CC_T_00107955,CAFS_CC_T_00009578,CAFS_CC_T_00232684,CAFS_CC_T_00065280,CAFS_CC_T_00022154,CAFS_CC_T_00054174,CAFS_CC_T_00056368,CAFS_CC_T_00101832,CAFS_CC_T_00101447,CAFS_CC_T_00181523,CAFS_CC_T_00060742,CAFS_CC_T_00068677,…
determination of bilateral symmetry	GO:0009855	0.0172524	1.49697	31	486	1052	24689	CAFS_CC_T_00068921,CAFS_CC_T_00076923,CAFS_CC_T_00034209,CAFS_CC_T_00178602,CAFS_CC_T_00051147,CAFS_CC_T_00170756,CAFS_CC_T_00095150,CAFS_CC_T_00244601,CAFS_CC_T_00022592,CAFS_CC_T_00107955,CAFS_CC_T_00009578,CAFS_CC_T_00232684,CAFS_CC_T_00065280,CAFS_CC_T_00022154,CAFS_CC_T_00054174,CAFS_CC_T_00056368,CAFS_CC_T_00101832,CAFS_CC_T_00101447,CAFS_CC_T_00181523,CAFS_CC_T_00060742,CAFS_CC_T_00068677,…
developmental induction	GO:0031128	0.0176303	3.91144	4	24	1052	24689	CAFS_CC_T_00178602,CAFS_CC_T_00022154,CAFS_CC_T_00056368,CAFS_CC_T_00176310,
glucosidase activity	GO:0015926	0.0176568	3.25303	5	36	1062	24874	CAFS_CC_T_00168382,CAFS_CC_T_00018963,CAFS_CC_T_00077733,CAFS_CC_T_00136989,CAFS_CC_T_00081536,
alpha-glucosidase activity	GO:0090599	0.0177479	3.90364	4	24	1062	24874	CAFS_CC_T_00168382,CAFS_CC_T_00018963,CAFS_CC_T_00077733,CAFS_CC_T_00136989,
meiotic nuclear division	GO:0140013	0.0178549	2.40704	8	78	1052	24689	CAFS_CC_T_00229821,CAFS_CC_T_00168308,CAFS_CC_T_00220971,CAFS_CC_T_00077224,CAFS_CC_T_00025684,CAFS_CC_T_00159178,CAFS_CC_T_00082185,CAFS_CC_T_00092242,
kinesin complex	GO:0005871	0.0183264	2.1474	10	111	1007	24003	CAFS_CC_T_00005368,CAFS_CC_T_00157661,CAFS_CC_T_00140452,CAFS_CC_T_00045356,CAFS_CC_T_00226471,CAFS_CC_T_00038919,CAFS_CC_T_00197862,CAFS_CC_T_00135299,CAFS_CC_T_00165912,CAFS_CC_T_00245712,
microtubule organizing center	GO:0005815	0.0183438	1.58467	24	361	1007	24003	CAFS_CC_T_00082393,CAFS_CC_T_00229821,CAFS_CC_T_00104355,CAFS_CC_T_00163525,CAFS_CC_T_00040427,CAFS_CC_T_00243304,CAFS_CC_T_00159583,CAFS_CC_T_00117302,CAFS_CC_T_00038972,CAFS_CC_T_00054174,CAFS_CC_T_00068707,CAFS_CC_T_00176576,CAFS_CC_T_00101447,CAFS_CC_T_00135299,CAFS_CC_T_00201634,CAFS_CC_T_00176632,CAFS_CC_T_00068677,CAFS_CC_T_00200480,CAFS_CC_T_00189544,CAFS_CC_T_00079716,CAFS_CC_T_00186490,…
ATP-dependent activity	GO:0140657	0.0184161	1.37089	47	803	1062	24874	CAFS_CC_T_00054759,CAFS_CC_T_00241902,CAFS_CC_T_00082393,CAFS_CC_T_00101695,CAFS_CC_T_00132374,CAFS_CC_T_00168308,CAFS_CC_T_00005368,CAFS_CC_T_00157661,CAFS_CC_T_00033813,CAFS_CC_T_00022689,CAFS_CC_T_00228026,CAFS_CC_T_00141336,CAFS_CC_T_00140452,CAFS_CC_T_00045356,CAFS_CC_T_00172989,CAFS_CC_T_00219739,CAFS_CC_T_00226471,CAFS_CC_T_00051916,CAFS_CC_T_00082673,CAFS_CC_T_00049614,CAFS_CC_T_00216146,…
regulation of cell adhesion	GO:0030155	0.0187154	1.86682	14	176	1052	24689	CAFS_CC_T_00228563,CAFS_CC_T_00052562,CAFS_CC_T_00090376,CAFS_CC_T_00243304,CAFS_CC_T_00059470,CAFS_CC_T_00133857,CAFS_CC_T_00075833,CAFS_CC_T_00008592,CAFS_CC_T_00070532,CAFS_CC_T_00009805,CAFS_CC_T_00222286,CAFS_CC_T_00070089,CAFS_CC_T_00129929,CAFS_CC_T_00056545,
ESCRT I complex	GO:0000813	0.0189472	5.10775	3	14	1007	24003	CAFS_CC_T_00078215,CAFS_CC_T_00126636,CAFS_CC_T_00107915,
ESCRT complex	GO:0036452	0.0192831	3.81378	4	25	1007	24003	CAFS_CC_T_00082393,CAFS_CC_T_00078215,CAFS_CC_T_00126636,CAFS_CC_T_00107915,
serine-type exopeptidase activity	GO:0070008	0.0197182	3.16511	5	37	1062	24874	CAFS_CC_T_00039924,CAFS_CC_T_00242497,CAFS_CC_T_00066142,CAFS_CC_T_00050167,CAFS_CC_T_00187714,
endothelial to hematopoietic transition	GO:0098508	0.0197451	5.02899	3	14	1052	24689	CAFS_CC_T_00090376,CAFS_CC_T_00008592,CAFS_CC_T_00222286,
cell-cell adhesion mediated by cadherin	GO:0044331	0.0197451	5.02899	3	14	1052	24689	CAFS_CC_T_00243304,CAFS_CC_T_00009805,CAFS_CC_T_00129929,
DNA demethylation	GO:0080111	0.0197451	5.02899	3	14	1052	24689	CAFS_CC_T_00081407,CAFS_CC_T_00008592,CAFS_CC_T_00222286,
metal ion binding	GO:0046872	0.0200023	1.12254	252	5258	1062	24874	CAFS_CC_T_00213429,CAFS_CC_T_00204934,CAFS_CC_T_00130141,CAFS_CC_T_00054759,CAFS_CC_T_00233029,CAFS_CC_T_00084153,CAFS_CC_T_00225874,CAFS_CC_T_00181702,CAFS_CC_T_00214741,CAFS_CC_T_00191107,CAFS_CC_T_00090898,CAFS_CC_T_00016437,CAFS_CC_T_00221092,CAFS_CC_T_00228932,CAFS_CC_T_00027559,CAFS_CC_T_00099691,CAFS_CC_T_00101673,CAFS_CC_T_00166181,CAFS_CC_T_00050302,CAFS_CC_T_00113661,CAFS_CC_T_00060588,…
calcium channel complex	GO:0034704	0.020198	2.35419	8	81	1007	24003	CAFS_CC_T_00191107,CAFS_CC_T_00060588,CAFS_CC_T_00124742,CAFS_CC_T_00187062,CAFS_CC_T_00239161,CAFS_CC_T_00041831,CAFS_CC_T_00086838,CAFS_CC_T_00016959,
plasma membrane bounded cell projection assembly	GO:0120031	0.0223338	1.52546	26	400	1052	24689	CAFS_CC_T_00068921,CAFS_CC_T_00065824,CAFS_CC_T_00005368,CAFS_CC_T_00033813,CAFS_CC_T_00131126,CAFS_CC_T_00051147,CAFS_CC_T_00006529,CAFS_CC_T_00156497,CAFS_CC_T_00095150,CAFS_CC_T_00166750,CAFS_CC_T_00165855,CAFS_CC_T_00104478,CAFS_CC_T_00065280,CAFS_CC_T_00058530,CAFS_CC_T_00101832,CAFS_CC_T_00166338,CAFS_CC_T_00040380,CAFS_CC_T_00101447,CAFS_CC_T_00139661,CAFS_CC_T_00201634,CAFS_CC_T_00176632,…
deaminase activity	GO:0019239	0.0228398	2.70252	6	52	1062	24874	CAFS_CC_T_00061015,CAFS_CC_T_00123491,CAFS_CC_T_00081317,CAFS_CC_T_00196592,CAFS_CC_T_00098470,CAFS_CC_T_00115384,
Golgi transport complex	GO:0017119	0.022959	4.76723	3	15	1007	24003	CAFS_CC_T_00201093,CAFS_CC_T_00247474,CAFS_CC_T_00217751,
centriole	GO:0005814	0.023038	2.69843	6	53	1007	24003	CAFS_CC_T_00040427,CAFS_CC_T_00159583,CAFS_CC_T_00068707,CAFS_CC_T_00101447,CAFS_CC_T_00200480,CAFS_CC_T_00189544,
serine-type endopeptidase activity	GO:0004252	0.0231037	1.77438	15	198	1062	24874	CAFS_CC_T_00027101,CAFS_CC_T_00197798,CAFS_CC_T_00116727,CAFS_CC_T_00039924,CAFS_CC_T_00189765,CAFS_CC_T_00184922,CAFS_CC_T_00152913,CAFS_CC_T_00050167,CAFS_CC_T_00004296,CAFS_CC_T_00078436,CAFS_CC_T_00037539,CAFS_CC_T_00246225,CAFS_CC_T_00165592,CAFS_CC_T_00074405,CAFS_CC_T_00240544,
cilium organization	GO:0044782	0.0233076	1.58377	22	326	1052	24689	CAFS_CC_T_00068921,CAFS_CC_T_00005368,CAFS_CC_T_00033813,CAFS_CC_T_00051147,CAFS_CC_T_00006529,CAFS_CC_T_00156497,CAFS_CC_T_00095150,CAFS_CC_T_00165855,CAFS_CC_T_00104478,CAFS_CC_T_00065280,CAFS_CC_T_00058530,CAFS_CC_T_00101832,CAFS_CC_T_00166338,CAFS_CC_T_00040380,CAFS_CC_T_00101447,CAFS_CC_T_00139661,CAFS_CC_T_00201634,CAFS_CC_T_00176632,CAFS_CC_T_00177586,CAFS_CC_T_00153576,CAFS_CC_T_00045404,…
myosin II complex	GO:0016460	0.0235662	7.94538	2	6	1007	24003	CAFS_CC_T_00247673,CAFS_CC_T_00123597,
chromosome segregation	GO:0007059	0.023666	1.76899	15	199	1052	24689	CAFS_CC_T_00082393,CAFS_CC_T_00229821,CAFS_CC_T_00168308,CAFS_CC_T_00105245,CAFS_CC_T_00163525,CAFS_CC_T_00077224,CAFS_CC_T_00159178,CAFS_CC_T_00082185,CAFS_CC_T_00060787,CAFS_CC_T_00176632,CAFS_CC_T_00200480,CAFS_CC_T_00096656,CAFS_CC_T_00092242,CAFS_CC_T_00160325,CAFS_CC_T_00164792,
DNA dealkylation	GO:0035510	0.0239141	4.69373	3	15	1052	24689	CAFS_CC_T_00081407,CAFS_CC_T_00008592,CAFS_CC_T_00222286,
cardiac muscle cell action potential	GO:0086001	0.0239141	4.69373	3	15	1052	24689	CAFS_CC_T_00041831,CAFS_CC_T_00026888,CAFS_CC_T_00226653,
protein deglycosylation	GO:0006517	0.0239141	4.69373	3	15	1052	24689	CAFS_CC_T_00018963,CAFS_CC_T_00136989,CAFS_CC_T_00081536,
catalytic activity, acting on a protein	GO:0140096	0.0240107	1.1401	195	4006	1062	24874	CAFS_CC_T_00134996,CAFS_CC_T_00213429,CAFS_CC_T_00119352,CAFS_CC_T_00054759,CAFS_CC_T_00055621,CAFS_CC_T_00111897,CAFS_CC_T_00027101,CAFS_CC_T_00016437,CAFS_CC_T_00099691,CAFS_CC_T_00053831,CAFS_CC_T_00229821,CAFS_CC_T_00197270,CAFS_CC_T_00239631,CAFS_CC_T_00076948,CAFS_CC_T_00190657,CAFS_CC_T_00224183,CAFS_CC_T_00171142,CAFS_CC_T_00183112,CAFS_CC_T_00119805,CAFS_CC_T_00118957,CAFS_CC_T_00197798,…
inorganic phosphate transmembrane transporter activity	GO:0005315	0.0240396	4.68437	3	15	1062	24874	CAFS_CC_T_00242041,CAFS_CC_T_00070115,CAFS_CC_T_00129821,
spectrin binding	GO:0030507	0.0240396	4.68437	3	15	1062	24874	CAFS_CC_T_00140968,CAFS_CC_T_00162952,CAFS_CC_T_00186531,
axoneme assembly	GO:0035082	0.0241142	3.0088	5	39	1052	24689	CAFS_CC_T_00058530,CAFS_CC_T_00101447,CAFS_CC_T_00177586,CAFS_CC_T_00153576,CAFS_CC_T_00045404,
cerebrospinal fluid circulation	GO:0090660	0.0242676	7.82288	2	6	1052	24689	CAFS_CC_T_00190657,CAFS_CC_T_00153576,
specification of animal organ position	GO:0010159	0.0242676	7.82288	2	6	1052	24689	CAFS_CC_T_00022154,CAFS_CC_T_00154983,
5-methylcytosine metabolic process	GO:0019857	0.0242676	7.82288	2	6	1052	24689	CAFS_CC_T_00008592,CAFS_CC_T_00222286,
purine nucleoside catabolic process	GO:0006152	0.0242676	7.82288	2	6	1052	24689	CAFS_CC_T_00081317,CAFS_CC_T_00196592,
5-methylcytosine catabolic process	GO:0006211	0.0242676	7.82288	2	6	1052	24689	CAFS_CC_T_00008592,CAFS_CC_T_00222286,
NAD+ ADP-ribosyltransferase activity	GO:0003950	0.0242988	3.0028	5	39	1062	24874	CAFS_CC_T_00119817,CAFS_CC_T_00168516,CAFS_CC_T_00164210,CAFS_CC_T_00164614,CAFS_CC_T_00057076,
oxidoreductase activity, acting on paired donors, with incorporation or reduction of molecular oxygen, another compound as one donor, and incorporation of one atom of oxygen	GO:0016716	0.0243592	7.80728	2	6	1062	24874	CAFS_CC_T_00214741,CAFS_CC_T_00152481,
methylcytosine dioxygenase activity	GO:0070579	0.0243592	7.80728	2	6	1062	24874	CAFS_CC_T_00008592,CAFS_CC_T_00222286,
prostaglandin-E synthase activity	GO:0050220	0.0243592	7.80728	2	6	1062	24874	CAFS_CC_T_00239631,CAFS_CC_T_00115709,
structural molecule activity conferring elasticity	GO:0097493	0.0243592	7.80728	2	6	1062	24874	CAFS_CC_T_00247673,CAFS_CC_T_00123597,
leukotriene B4 receptor activity	GO:0001632	0.0243592	7.80728	2	6	1062	24874	CAFS_CC_T_00067525,CAFS_CC_T_00174935,
GTP cyclohydrolase activity	GO:0003933	0.0243592	7.80728	2	6	1062	24874	CAFS_CC_T_00061015,CAFS_CC_T_00081317,
regulation of microtubule cytoskeleton organization	GO:0070507	0.0246427	2.65683	6	53	1052	24689	CAFS_CC_T_00082393,CAFS_CC_T_00015944,CAFS_CC_T_00014577,CAFS_CC_T_00000389,CAFS_CC_T_00135676,CAFS_CC_T_00075833,
cation binding	GO:0043169	0.0256276	1.11429	257	5402	1062	24874	CAFS_CC_T_00213429,CAFS_CC_T_00204934,CAFS_CC_T_00130141,CAFS_CC_T_00054759,CAFS_CC_T_00233029,CAFS_CC_T_00084153,CAFS_CC_T_00225874,CAFS_CC_T_00181702,CAFS_CC_T_00214741,CAFS_CC_T_00191107,CAFS_CC_T_00090898,CAFS_CC_T_00016437,CAFS_CC_T_00221092,CAFS_CC_T_00228932,CAFS_CC_T_00027559,CAFS_CC_T_00099691,CAFS_CC_T_00101673,CAFS_CC_T_00166181,CAFS_CC_T_00050302,CAFS_CC_T_00113661,CAFS_CC_T_00060588,…
cell projection assembly	GO:0030031	0.0262513	1.50292	26	406	1052	24689	CAFS_CC_T_00068921,CAFS_CC_T_00065824,CAFS_CC_T_00005368,CAFS_CC_T_00033813,CAFS_CC_T_00131126,CAFS_CC_T_00051147,CAFS_CC_T_00006529,CAFS_CC_T_00156497,CAFS_CC_T_00095150,CAFS_CC_T_00166750,CAFS_CC_T_00165855,CAFS_CC_T_00104478,CAFS_CC_T_00065280,CAFS_CC_T_00058530,CAFS_CC_T_00101832,CAFS_CC_T_00166338,CAFS_CC_T_00040380,CAFS_CC_T_00101447,CAFS_CC_T_00139661,CAFS_CC_T_00201634,CAFS_CC_T_00176632,…
catalytic activity	GO:0003824	0.0263885	1.07267	455	9935	1062	24874	CAFS_CC_T_00134996,CAFS_CC_T_00208063,CAFS_CC_T_00213429,CAFS_CC_T_00220191,CAFS_CC_T_00119352,CAFS_CC_T_00066729,CAFS_CC_T_00166592,CAFS_CC_T_00054759,CAFS_CC_T_00233029,CAFS_CC_T_00055621,CAFS_CC_T_00111897,CAFS_CC_T_00041465,CAFS_CC_T_00027101,CAFS_CC_T_00214741,CAFS_CC_T_00158924,CAFS_CC_T_00044514,CAFS_CC_T_00016437,CAFS_CC_T_00180822,CAFS_CC_T_00241902,CAFS_CC_T_00119332,CAFS_CC_T_00166518,…
regulation of protein depolymerization	GO:1901879	0.026623	2.93358	5	40	1052	24689	CAFS_CC_T_00015944,CAFS_CC_T_00030266,CAFS_CC_T_00014577,CAFS_CC_T_00135676,CAFS_CC_T_00156595,
positive regulation of cell cycle process	GO:0090068	0.026623	2.93358	5	40	1052	24689	CAFS_CC_T_00229821,CAFS_CC_T_00040427,CAFS_CC_T_00243304,CAFS_CC_T_00228141,CAFS_CC_T_00060742,
regulation of protein-containing complex disassembly	GO:0043244	0.0267582	2.60763	6	54	1052	24689	CAFS_CC_T_00015944,CAFS_CC_T_00030266,CAFS_CC_T_00239238,CAFS_CC_T_00014577,CAFS_CC_T_00135676,CAFS_CC_T_00156595,
nuclear chromosome segregation	GO:0098813	0.0270338	1.87749	12	150	1052	24689	CAFS_CC_T_00082393,CAFS_CC_T_00229821,CAFS_CC_T_00168308,CAFS_CC_T_00105245,CAFS_CC_T_00077224,CAFS_CC_T_00159178,CAFS_CC_T_00082185,CAFS_CC_T_00060787,CAFS_CC_T_00176632,CAFS_CC_T_00200480,CAFS_CC_T_00092242,CAFS_CC_T_00164792,
integrin complex	GO:0008305	0.0271317	2.60031	6	55	1007	24003	CAFS_CC_T_00203621,CAFS_CC_T_00007941,CAFS_CC_T_00137665,CAFS_CC_T_00140511,CAFS_CC_T_00083839,CAFS_CC_T_00112664,
protein complex involved in cell adhesion	GO:0098636	0.0271317	2.60031	6	55	1007	24003	CAFS_CC_T_00203621,CAFS_CC_T_00007941,CAFS_CC_T_00137665,CAFS_CC_T_00140511,CAFS_CC_T_00083839,CAFS_CC_T_00112664,
collagen-containing extracellular matrix	GO:0062023	0.0273942	4.46928	3	16	1007	24003	CAFS_CC_T_00233839,CAFS_CC_T_00158251,CAFS_CC_T_00156162,
S-adenosylmethionine-dependent methyltransferase activity	GO:0008757	0.0280713	1.73068	15	203	1062	24874	CAFS_CC_T_00119805,CAFS_CC_T_00058223,CAFS_CC_T_00034655,CAFS_CC_T_00064004,CAFS_CC_T_00192660,CAFS_CC_T_00050552,CAFS_CC_T_00108032,CAFS_CC_T_00185570,CAFS_CC_T_00233385,CAFS_CC_T_00223156,CAFS_CC_T_00096656,CAFS_CC_T_00121598,CAFS_CC_T_00197198,CAFS_CC_T_00019150,CAFS_CC_T_00016964,
peptide hormone processing	GO:0016486	0.0285201	4.40037	3	16	1052	24689	CAFS_CC_T_00116010,CAFS_CC_T_00024314,CAFS_CC_T_00018899,
signaling receptor ligand precursor processing	GO:0140448	0.0285201	4.40037	3	16	1052	24689	CAFS_CC_T_00116010,CAFS_CC_T_00024314,CAFS_CC_T_00018899,
delamination	GO:0060232	0.0285201	4.40037	3	16	1052	24689	CAFS_CC_T_00090376,CAFS_CC_T_00008592,CAFS_CC_T_00222286,
glomerular filtration	GO:0003094	0.0285201	4.40037	3	16	1052	24689	CAFS_CC_T_00112009,CAFS_CC_T_00227949,CAFS_CC_T_00220850,
phosphate ion transport	GO:0006817	0.0285201	4.40037	3	16	1052	24689	CAFS_CC_T_00242041,CAFS_CC_T_00070115,CAFS_CC_T_00129821,
modified amino acid binding	GO:0072341	0.028668	4.3916	3	16	1062	24874	CAFS_CC_T_00239631,CAFS_CC_T_00115709,CAFS_CC_T_00139732,
telomeric DNA binding	GO:0042162	0.028668	4.3916	3	16	1062	24874	CAFS_CC_T_00141336,CAFS_CC_T_00039924,CAFS_CC_T_00204808,
sodium:phosphate symporter activity	GO:0005436	0.028668	4.3916	3	16	1062	24874	CAFS_CC_T_00242041,CAFS_CC_T_00070115,CAFS_CC_T_00129821,
cellular amino acid metabolic process	GO:0006520	0.0286819	1.55048	22	333	1052	24689	CAFS_CC_T_00233029,CAFS_CC_T_00157697,CAFS_CC_T_00075651,CAFS_CC_T_00066713,CAFS_CC_T_00107829,CAFS_CC_T_00219561,CAFS_CC_T_00120832,CAFS_CC_T_00234776,CAFS_CC_T_00152481,CAFS_CC_T_00234800,CAFS_CC_T_00057649,CAFS_CC_T_00105389,CAFS_CC_T_00244388,CAFS_CC_T_00008600,CAFS_CC_T_00190033,CAFS_CC_T_00082140,CAFS_CC_T_00052717,CAFS_CC_T_00154879,CAFS_CC_T_00073103,CAFS_CC_T_00040212,CAFS_CC_T_00199828,…
obsolete intracellular part	GO:0044424	0.0290875	2.35004	7	71	1007	24003	CAFS_CC_T_00121746,CAFS_CC_T_00042285,CAFS_CC_T_00031980,CAFS_CC_T_00101034,CAFS_CC_T_00086093,CAFS_CC_T_00145194,CAFS_CC_T_00183067,
hydrolase activity, acting on carbon-nitrogen (but not peptide) bonds, in cyclic amidines	GO:0016814	0.0292381	2.55511	6	55	1062	24874	CAFS_CC_T_00061015,CAFS_CC_T_00060069,CAFS_CC_T_00081317,CAFS_CC_T_00196592,CAFS_CC_T_00098470,CAFS_CC_T_00115384,
regulation of inflammatory response	GO:0050727	0.0292922	2.86203	5	41	1052	24689	CAFS_CC_T_00234773,CAFS_CC_T_00192519,CAFS_CC_T_00154853,CAFS_CC_T_00033924,CAFS_CC_T_00108184,
renal filtration cell differentiation	GO:0061318	0.0292922	2.86203	5	41	1052	24689	CAFS_CC_T_00208426,CAFS_CC_T_00032297,CAFS_CC_T_00227949,CAFS_CC_T_00062002,CAFS_CC_T_00220850,
glomerular epithelium development	GO:0072010	0.0292922	2.86203	5	41	1052	24689	CAFS_CC_T_00208426,CAFS_CC_T_00032297,CAFS_CC_T_00227949,CAFS_CC_T_00062002,CAFS_CC_T_00220850,
glomerular visceral epithelial cell differentiation	GO:0072112	0.0292922	2.86203	5	41	1052	24689	CAFS_CC_T_00208426,CAFS_CC_T_00032297,CAFS_CC_T_00227949,CAFS_CC_T_00062002,CAFS_CC_T_00220850,
glomerular epithelial cell differentiation	GO:0072311	0.0292922	2.86203	5	41	1052	24689	CAFS_CC_T_00208426,CAFS_CC_T_00032297,CAFS_CC_T_00227949,CAFS_CC_T_00062002,CAFS_CC_T_00220850,
negative regulation of organelle organization	GO:0010639	0.0293715	1.98887	10	118	1052	24689	CAFS_CC_T_00015944,CAFS_CC_T_00105245,CAFS_CC_T_00156497,CAFS_CC_T_00014577,CAFS_CC_T_00025684,CAFS_CC_T_00159178,CAFS_CC_T_00219263,CAFS_CC_T_00135676,CAFS_CC_T_00156595,CAFS_CC_T_00060787,
tRNA processing	GO:0008033	0.0293715	1.98887	10	118	1052	24689	CAFS_CC_T_00061015,CAFS_CC_T_00058223,CAFS_CC_T_00123491,CAFS_CC_T_00076068,CAFS_CC_T_00015976,CAFS_CC_T_00154353,CAFS_CC_T_00171352,CAFS_CC_T_00185570,CAFS_CC_T_00121598,CAFS_CC_T_00016964,
homophilic cell adhesion via plasma membrane adhesion molecules	GO:0007156	0.0296033	1.75701	14	187	1052	24689	CAFS_CC_T_00113661,CAFS_CC_T_00233839,CAFS_CC_T_00179910,CAFS_CC_T_00115474,CAFS_CC_T_00027084,CAFS_CC_T_00186747,CAFS_CC_T_00014566,CAFS_CC_T_00150847,CAFS_CC_T_00243433,CAFS_CC_T_00008916,CAFS_CC_T_00030010,CAFS_CC_T_00158426,CAFS_CC_T_00129929,CAFS_CC_T_00121611,
vesicle fusion	GO:0006906	0.0298075	1.71722	15	205	1052	24689	CAFS_CC_T_00027559,CAFS_CC_T_00189635,CAFS_CC_T_00027182,CAFS_CC_T_00215239,CAFS_CC_T_00219550,CAFS_CC_T_00078224,CAFS_CC_T_00063140,CAFS_CC_T_00159115,CAFS_CC_T_00239238,CAFS_CC_T_00114728,CAFS_CC_T_00105433,CAFS_CC_T_00007242,CAFS_CC_T_00183850,CAFS_CC_T_00182148,CAFS_CC_T_00242267,
cell projection organization	GO:0030030	0.0298221	1.25501	70	1309	1052	24689	CAFS_CC_T_00068921,CAFS_CC_T_00215614,CAFS_CC_T_00040142,CAFS_CC_T_00144768,CAFS_CC_T_00191952,CAFS_CC_T_00065824,CAFS_CC_T_00075654,CAFS_CC_T_00228563,CAFS_CC_T_00168308,CAFS_CC_T_00005368,CAFS_CC_T_00033813,CAFS_CC_T_00034209,CAFS_CC_T_00230301,CAFS_CC_T_00169238,CAFS_CC_T_00201896,CAFS_CC_T_00140452,CAFS_CC_T_00131126,CAFS_CC_T_00051147,CAFS_CC_T_00117267,CAFS_CC_T_00006529,CAFS_CC_T_00156497,…
dynein complex	GO:0030286	0.030318	2.83764	5	42	1007	24003	CAFS_CC_T_00033813,CAFS_CC_T_00228026,CAFS_CC_T_00101322,CAFS_CC_T_00049614,CAFS_CC_T_00137075,
RNA methylation	GO:0001510	0.031342	2.5145	6	56	1052	24689	CAFS_CC_T_00058223,CAFS_CC_T_00185570,CAFS_CC_T_00233385,CAFS_CC_T_00121598,CAFS_CC_T_00197198,CAFS_CC_T_00016964,
tRNA methyltransferase complex	GO:0043527	0.0320849	6.81033	2	7	1007	24003	CAFS_CC_T_00185570,CAFS_CC_T_00121598,
nuclear pore inner ring	GO:0044611	0.0320849	6.81033	2	7	1007	24003	CAFS_CC_T_00184524,CAFS_CC_T_00164235,
voltage-gated calcium channel activity	GO:0005245	0.0323278	2.15373	8	87	1062	24874	CAFS_CC_T_00191107,CAFS_CC_T_00124742,CAFS_CC_T_00187062,CAFS_CC_T_00239161,CAFS_CC_T_00102000,CAFS_CC_T_00086838,CAFS_CC_T_00016959,CAFS_CC_T_00016932,
regulation of GTPase activity	GO:0043087	0.0327222	1.46003	27	434	1052	24689	CAFS_CC_T_00215614,CAFS_CC_T_00065884,CAFS_CC_T_00189635,CAFS_CC_T_00228563,CAFS_CC_T_00219550,CAFS_CC_T_00051160,CAFS_CC_T_00230933,CAFS_CC_T_00095150,CAFS_CC_T_00072037,CAFS_CC_T_00239238,CAFS_CC_T_00228141,CAFS_CC_T_00124006,CAFS_CC_T_00117336,CAFS_CC_T_00229089,CAFS_CC_T_00066979,CAFS_CC_T_00075833,CAFS_CC_T_00114728,CAFS_CC_T_00152628,CAFS_CC_T_00104535,CAFS_CC_T_00105433,CAFS_CC_T_00242156,…
purine nucleobase catabolic process	GO:0006145	0.0330254	6.70532	2	7	1052	24689	CAFS_CC_T_00192252,CAFS_CC_T_00066848,
organelle membrane fusion	GO:0090174	0.0332845	1.69245	15	208	1052	24689	CAFS_CC_T_00027559,CAFS_CC_T_00189635,CAFS_CC_T_00027182,CAFS_CC_T_00215239,CAFS_CC_T_00219550,CAFS_CC_T_00078224,CAFS_CC_T_00063140,CAFS_CC_T_00159115,CAFS_CC_T_00239238,CAFS_CC_T_00114728,CAFS_CC_T_00105433,CAFS_CC_T_00007242,CAFS_CC_T_00183850,CAFS_CC_T_00182148,CAFS_CC_T_00242267,
purine ribonucleoside metabolic process	GO:0046128	0.0335602	4.14152	3	17	1052	24689	CAFS_CC_T_00081317,CAFS_CC_T_00196592,CAFS_CC_T_00008600,
DNA-templated transcription, termination	GO:0006353	0.0335602	4.14152	3	17	1052	24689	CAFS_CC_T_00049744,CAFS_CC_T_00063019,CAFS_CC_T_00019227,
galactosidase activity	GO:0015925	0.0335652	3.2306	4	29	1062	24874	CAFS_CC_T_00168382,CAFS_CC_T_00018963,CAFS_CC_T_00165855,CAFS_CC_T_00136989,
maturation of LSU-rRNA	GO:0000470	0.0351215	2.72891	5	43	1052	24689	CAFS_CC_T_00098144,CAFS_CC_T_00104597,CAFS_CC_T_00022010,CAFS_CC_T_00233385,CAFS_CC_T_00099292,
plasma membrane bounded cell projection organization	GO:0120036	0.0363112	1.24373	69	1302	1052	24689	CAFS_CC_T_00068921,CAFS_CC_T_00215614,CAFS_CC_T_00040142,CAFS_CC_T_00144768,CAFS_CC_T_00191952,CAFS_CC_T_00065824,CAFS_CC_T_00075654,CAFS_CC_T_00228563,CAFS_CC_T_00168308,CAFS_CC_T_00005368,CAFS_CC_T_00033813,CAFS_CC_T_00034209,CAFS_CC_T_00230301,CAFS_CC_T_00169238,CAFS_CC_T_00201896,CAFS_CC_T_00140452,CAFS_CC_T_00131126,CAFS_CC_T_00051147,CAFS_CC_T_00117267,CAFS_CC_T_00006529,CAFS_CC_T_00156497,…
heterophilic cell-cell adhesion via plasma membrane cell adhesion molecules	GO:0007157	0.0364092	2.42779	6	58	1052	24689	CAFS_CC_T_00186747,CAFS_CC_T_00098114,CAFS_CC_T_00150847,CAFS_CC_T_00243433,CAFS_CC_T_00158426,CAFS_CC_T_00121611,
guanyl-nucleotide exchange factor activity	GO:0005085	0.0376863	1.54091	20	304	1062	24874	CAFS_CC_T_00065884,CAFS_CC_T_00018619,CAFS_CC_T_00150634,CAFS_CC_T_00164410,CAFS_CC_T_00051160,CAFS_CC_T_00230933,CAFS_CC_T_00204688,CAFS_CC_T_00102245,CAFS_CC_T_00117336,CAFS_CC_T_00228171,CAFS_CC_T_00194379,CAFS_CC_T_00068725,CAFS_CC_T_00139661,CAFS_CC_T_00104501,CAFS_CC_T_00068638,CAFS_CC_T_00067736,CAFS_CC_T_00228831,CAFS_CC_T_00227964,CAFS_CC_T_00114476,CAFS_CC_T_00101115,
purine nucleobase biosynthetic process	GO:0009113	0.0390295	3.91144	3	18	1052	24689	CAFS_CC_T_00060069,CAFS_CC_T_00081317,CAFS_CC_T_00196592,
purine nucleoside metabolic process	GO:0042278	0.0390295	3.91144	3	18	1052	24689	CAFS_CC_T_00081317,CAFS_CC_T_00196592,CAFS_CC_T_00008600,
negative regulation of reproductive process	GO:2000242	0.0390295	3.91144	3	18	1052	24689	CAFS_CC_T_00014566,CAFS_CC_T_00025684,CAFS_CC_T_00159178,
negative regulation of extrinsic apoptotic signaling pathway	GO:2001237	0.0390295	3.91144	3	18	1052	24689	CAFS_CC_T_00197020,CAFS_CC_T_00173284,CAFS_CC_T_00021055,
homologous chromosome segregation	GO:0045143	0.0390295	3.91144	3	18	1052	24689	CAFS_CC_T_00077224,CAFS_CC_T_00159178,CAFS_CC_T_00092242,
H4 histone acetyltransferase activity	GO:0010485	0.039227	3.90364	3	18	1062	24874	CAFS_CC_T_00118503,CAFS_CC_T_00121859,CAFS_CC_T_00134746,
cyclohydrolase activity	GO:0019238	0.039227	3.90364	3	18	1062	24874	CAFS_CC_T_00061015,CAFS_CC_T_00060069,CAFS_CC_T_00081317,
adenosine deaminase activity	GO:0004000	0.039227	3.90364	3	18	1062	24874	CAFS_CC_T_00061015,CAFS_CC_T_00081317,CAFS_CC_T_00196592,
neuron development	GO:0048666	0.039404	1.25193	63	1181	1052	24689	CAFS_CC_T_00215614,CAFS_CC_T_00040142,CAFS_CC_T_00144768,CAFS_CC_T_00191952,CAFS_CC_T_00065824,CAFS_CC_T_00075654,CAFS_CC_T_00228563,CAFS_CC_T_00168308,CAFS_CC_T_00034209,CAFS_CC_T_00230301,CAFS_CC_T_00169238,CAFS_CC_T_00042285,CAFS_CC_T_00201896,CAFS_CC_T_00140452,CAFS_CC_T_00131126,CAFS_CC_T_00051147,CAFS_CC_T_00117267,CAFS_CC_T_00006529,CAFS_CC_T_00226471,CAFS_CC_T_00060866,CAFS_CC_T_00038919,…
regulation of neurogenesis	GO:0050767	0.0397218	1.65272	15	213	1052	24689	CAFS_CC_T_00133646,CAFS_CC_T_00075654,CAFS_CC_T_00228563,CAFS_CC_T_00083504,CAFS_CC_T_00239226,CAFS_CC_T_00014577,CAFS_CC_T_00150847,CAFS_CC_T_00075833,CAFS_CC_T_00100540,CAFS_CC_T_00223091,CAFS_CC_T_00059282,CAFS_CC_T_00218563,CAFS_CC_T_00041930,CAFS_CC_T_00152347,CAFS_CC_T_00104266,
glomerulus development	GO:0032835	0.04023	2.06318	8	91	1052	24689	CAFS_CC_T_00208426,CAFS_CC_T_00112009,CAFS_CC_T_00215845,CAFS_CC_T_00218987,CAFS_CC_T_00032297,CAFS_CC_T_00227949,CAFS_CC_T_00062002,CAFS_CC_T_00220850,
cell morphogenesis involved in differentiation	GO:0000904	0.0410173	1.3121	44	787	1052	24689	CAFS_CC_T_00215614,CAFS_CC_T_00040142,CAFS_CC_T_00191952,CAFS_CC_T_00065824,CAFS_CC_T_00075654,CAFS_CC_T_00228563,CAFS_CC_T_00168308,CAFS_CC_T_00034209,CAFS_CC_T_00090376,CAFS_CC_T_00201896,CAFS_CC_T_00140452,CAFS_CC_T_00051147,CAFS_CC_T_00117267,CAFS_CC_T_00006529,CAFS_CC_T_00226471,CAFS_CC_T_00060866,CAFS_CC_T_00038919,CAFS_CC_T_00239226,CAFS_CC_T_00014577,CAFS_CC_T_00183282,CAFS_CC_T_00173482,…
regulation of cell-cell adhesion	GO:0022407	0.0411444	1.95572	9	108	1052	24689	CAFS_CC_T_00052562,CAFS_CC_T_00090376,CAFS_CC_T_00243304,CAFS_CC_T_00008592,CAFS_CC_T_00070532,CAFS_CC_T_00009805,CAFS_CC_T_00222286,CAFS_CC_T_00070089,CAFS_CC_T_00129929,
aromatic amino acid family metabolic process	GO:0009072	0.0413523	3.02821	4	31	1052	24689	CAFS_CC_T_00233029,CAFS_CC_T_00075651,CAFS_CC_T_00107829,CAFS_CC_T_00152481,
muscle tissue morphogenesis	GO:0060415	0.0413523	3.02821	4	31	1052	24689	CAFS_CC_T_00247673,CAFS_CC_T_00041831,CAFS_CC_T_00123597,CAFS_CC_T_00108605,
cardiac muscle tissue morphogenesis	GO:0055008	0.0413523	3.02821	4	31	1052	24689	CAFS_CC_T_00247673,CAFS_CC_T_00041831,CAFS_CC_T_00123597,CAFS_CC_T_00108605,
chromosome, telomeric repeat region	GO:0140445	0.0416071	5.95904	2	8	1007	24003	CAFS_CC_T_00039924,CAFS_CC_T_00204808,
dihydrolipoyl dehydrogenase complex	GO:0045240	0.0416071	5.95904	2	8	1007	24003	CAFS_CC_T_00140925,CAFS_CC_T_00131357,
oxoglutarate dehydrogenase complex	GO:0045252	0.0416071	5.95904	2	8	1007	24003	CAFS_CC_T_00140925,CAFS_CC_T_00131357,
triglyceride-rich plasma lipoprotein particle	GO:0034385	0.0416071	5.95904	2	8	1007	24003	CAFS_CC_T_00178596,CAFS_CC_T_00002045,
telomere cap complex	GO:0000782	0.0416071	5.95904	2	8	1007	24003	CAFS_CC_T_00039924,CAFS_CC_T_00204808,
nuclear telomere cap complex	GO:0000783	0.0416071	5.95904	2	8	1007	24003	CAFS_CC_T_00039924,CAFS_CC_T_00204808,
2 iron, 2 sulfur cluster binding	GO:0051537	0.0419203	2.60243	5	45	1062	24874	CAFS_CC_T_00214741,CAFS_CC_T_00044022,CAFS_CC_T_00192252,CAFS_CC_T_00066848,CAFS_CC_T_00042816,
obsolete microtubule organizing center part	GO:0044450	0.0419531	23.8361	1	1	1007	24003	CAFS_CC_T_00201634,
obsolete cell projection part	GO:0044463	0.0419531	23.8361	1	1	1007	24003	CAFS_CC_T_00042285,
RZZ complex	GO:1990423	0.0419531	23.8361	1	1	1007	24003	CAFS_CC_T_00164916,
amino acid transmembrane transport	GO:0003333	0.0419731	2.34686	6	60	1052	24689	CAFS_CC_T_00234776,CAFS_CC_T_00154720,CAFS_CC_T_00208155,CAFS_CC_T_00171799,CAFS_CC_T_00032297,CAFS_CC_T_00235527,
voltage-gated calcium channel complex	GO:0005891	0.0421956	2.34454	6	61	1007	24003	CAFS_CC_T_00191107,CAFS_CC_T_00124742,CAFS_CC_T_00187062,CAFS_CC_T_00239161,CAFS_CC_T_00086838,CAFS_CC_T_00016959,
Z disc	GO:0030018	0.0425464	2.16692	7	77	1007	24003	CAFS_CC_T_00247673,CAFS_CC_T_00060588,CAFS_CC_T_00041831,CAFS_CC_T_00201852,CAFS_CC_T_00024803,CAFS_CC_T_00123597,CAFS_CC_T_00101964,
negative regulation of fibroblast growth factor production	GO:0090272	0.0426101	23.4686	1	1	1052	24689	CAFS_CC_T_00243304,
positive regulation of collagen biosynthetic process	GO:0032967	0.0426101	23.4686	1	1	1052	24689	CAFS_CC_T_00243304,
positive regulation of the force of heart contraction	GO:0098735	0.0426101	23.4686	1	1	1052	24689	CAFS_CC_T_00041831,
regulation of AV node cell action potential	GO:0098904	0.0426101	23.4686	1	1	1052	24689	CAFS_CC_T_00041831,
regulation of SA node cell action potential	GO:0098907	0.0426101	23.4686	1	1	1052	24689	CAFS_CC_T_00041831,
regulation of ventricular cardiac muscle cell action potential	GO:0098911	0.0426101	23.4686	1	1	1052	24689	CAFS_CC_T_00041831,
regulation of glutamine family amino acid metabolic process	GO:0000820	0.0426101	23.4686	1	1	1052	24689	CAFS_CC_T_00234776,
regulation of arginine metabolic process	GO:0000821	0.0426101	23.4686	1	1	1052	24689	CAFS_CC_T_00234776,
negative regulation of exit from mitosis	GO:0001100	0.0426101	23.4686	1	1	1052	24689	CAFS_CC_T_00243304,
positive regulation of Wnt signaling pathway involved in dorsal/ventral axis specification	GO:2000055	0.0426101	23.4686	1	1	1052	24689	CAFS_CC_T_00218563,
positive regulation of ATPase-coupled calcium transmembrane transporter activity	GO:1901896	0.0426101	23.4686	1	1	1052	24689	CAFS_CC_T_00041831,
regulation of ATPase-coupled calcium transmembrane transporter activity	GO:1901894	0.0426101	23.4686	1	1	1052	24689	CAFS_CC_T_00041831,
positive regulation of endothelial cell apoptotic process	GO:2000353	0.0426101	23.4686	1	1	1052	24689	CAFS_CC_T_00243304,
positive regulation of dendrite morphogenesis	GO:0050775	0.0426101	23.4686	1	1	1052	24689	CAFS_CC_T_00218563,
histone H3-K79 methylation	GO:0034729	0.0426101	23.4686	1	1	1052	24689	CAFS_CC_T_00192660,
positive regulation of collagen metabolic process	GO:0010714	0.0426101	23.4686	1	1	1052	24689	CAFS_CC_T_00243304,
response to redox state	GO:0051775	0.0426101	23.4686	1	1	1052	24689	CAFS_CC_T_00041831,
calcium-mediated signaling using intracellular calcium source	GO:0035584	0.0426101	23.4686	1	1	1052	24689	CAFS_CC_T_00041831,
histone H3-K4 acetylation	GO:0043973	0.0426101	23.4686	1	1	1052	24689	CAFS_CC_T_00133857,
chromosome passenger complex localization to spindle midzone	GO:0035853	0.0426101	23.4686	1	1	1052	24689	CAFS_CC_T_00194555,
response to muscle stretch	GO:0035994	0.0426101	23.4686	1	1	1052	24689	CAFS_CC_T_00041831,
positive regulation of extracellular matrix constituent secretion	GO:0003331	0.0426101	23.4686	1	1	1052	24689	CAFS_CC_T_00243304,
positive regulation of dendritic spine morphogenesis	GO:0061003	0.0426101	23.4686	1	1	1052	24689	CAFS_CC_T_00218563,
SA node cell action potential	GO:0086015	0.0426101	23.4686	1	1	1052	24689	CAFS_CC_T_00041831,
AV node cell action potential	GO:0086016	0.0426101	23.4686	1	1	1052	24689	CAFS_CC_T_00041831,
SA node cell to atrial cardiac muscle cell signaling	GO:0086018	0.0426101	23.4686	1	1	1052	24689	CAFS_CC_T_00041831,
AV node cell to bundle of His cell signaling	GO:0086027	0.0426101	23.4686	1	1	1052	24689	CAFS_CC_T_00041831,
Purkinje myocyte to ventricular cardiac muscle cell signaling	GO:0086029	0.0426101	23.4686	1	1	1052	24689	CAFS_CC_T_00041831,
AV node cell to bundle of His cell communication	GO:0086067	0.0426101	23.4686	1	1	1052	24689	CAFS_CC_T_00041831,
Purkinje myocyte to ventricular cardiac muscle cell communication	GO:0086068	0.0426101	23.4686	1	1	1052	24689	CAFS_CC_T_00041831,
SA node cell to atrial cardiac muscle cell communication	GO:0086070	0.0426101	23.4686	1	1	1052	24689	CAFS_CC_T_00041831,
positive regulation of cytolysis	GO:0045919	0.0426101	23.4686	1	1	1052	24689	CAFS_CC_T_00182034,
cell proliferation in hindbrain ventricular zone	GO:0021923	0.0426101	23.4686	1	1	1052	24689	CAFS_CC_T_00091455,
cellular response to caffeine	GO:0071313	0.0426101	23.4686	1	1	1052	24689	CAFS_CC_T_00041831,
cellular response to purine-containing compound	GO:0071415	0.0426101	23.4686	1	1	1052	24689	CAFS_CC_T_00041831,
manganese ion transmembrane transport	GO:0071421	0.0426101	23.4686	1	1	1052	24689	CAFS_CC_T_00041831,
regulation of hemoglobin biosynthetic process	GO:0046984	0.0426101	23.4686	1	1	1052	24689	CAFS_CC_T_00133857,
positive regulation of hemoglobin biosynthetic process	GO:0046985	0.0426101	23.4686	1	1	1052	24689	CAFS_CC_T_00133857,
response to caffeine	GO:0031000	0.0426101	23.4686	1	1	1052	24689	CAFS_CC_T_00041831,
dopamine biosynthetic process from tyrosine	GO:0006585	0.0426101	23.4686	1	1	1052	24689	CAFS_CC_T_00152481,
fibroblast activation	GO:0072537	0.0426101	23.4686	1	1	1052	24689	CAFS_CC_T_00243304,
obsolete positive regulation of cyclin-dependent protein serine/threonine kinase activity involved in G1/S transition of mitotic cell cycle	GO:0031659	0.0426101	23.4686	1	1	1052	24689	CAFS_CC_T_00243304,
response to magnesium ion	GO:0032026	0.0426101	23.4686	1	1	1052	24689	CAFS_CC_T_00041831,
catechol oxidase activity	GO:0004097	0.0426952	23.4218	1	1	1062	24874	CAFS_CC_T_00152481,
G-rich strand telomeric DNA binding	GO:0098505	0.0426952	23.4218	1	1	1062	24874	CAFS_CC_T_00204808,
oxidoreductase activity, acting on diphenols and related substances as donors, oxygen as acceptor	GO:0016682	0.0426952	23.4218	1	1	1062	24874	CAFS_CC_T_00152481,
tyrosinase activity	GO:0004503	0.0426952	23.4218	1	1	1062	24874	CAFS_CC_T_00152481,
histone methyltransferase activity (H3-K79 specific)	GO:0031151	0.0426952	23.4218	1	1	1062	24874	CAFS_CC_T_00192660,
pantetheine-phosphate adenylyltransferase activity	GO:0004595	0.0426952	23.4218	1	1	1062	24874	CAFS_CC_T_00077957,
S-methyl-5-thioadenosine phosphorylase activity	GO:0017061	0.0426952	23.4218	1	1	1062	24874	CAFS_CC_T_00008600,
suramin binding	GO:0043924	0.0426952	23.4218	1	1	1062	24874	CAFS_CC_T_00041831,
histone methyltransferase activity (H3-K9 specific)	GO:0046974	0.0426952	23.4218	1	1	1062	24874	CAFS_CC_T_00096656,
establishment of mitochondrion localization, microtubule-mediated	GO:0034643	0.0428081	5.86716	2	8	1052	24689	CAFS_CC_T_00245712,CAFS_CC_T_00076155,
establishment of mitochondrion localization	GO:0051654	0.0428081	5.86716	2	8	1052	24689	CAFS_CC_T_00245712,CAFS_CC_T_00076155,
hypoxanthine metabolic process	GO:0046100	0.0428081	5.86716	2	8	1052	24689	CAFS_CC_T_00081317,CAFS_CC_T_00196592,
mitochondrion transport along microtubule	GO:0047497	0.0428081	5.86716	2	8	1052	24689	CAFS_CC_T_00245712,CAFS_CC_T_00076155,
isonicotinic acid hydrazide hydrolase activity	GO:0034876	0.0429648	5.85546	2	8	1062	24874	CAFS_CC_T_00057076,CAFS_CC_T_00000596,
cis-aconitamide amidase activity	GO:0034882	0.0429648	5.85546	2	8	1062	24874	CAFS_CC_T_00057076,CAFS_CC_T_00000596,
gamma-N-formylaminovinylacetate hydrolase activity	GO:0034885	0.0429648	5.85546	2	8	1062	24874	CAFS_CC_T_00057076,CAFS_CC_T_00000596,
protein-N-terminal asparagine amidohydrolase activity	GO:0008418	0.0429648	5.85546	2	8	1062	24874	CAFS_CC_T_00057076,CAFS_CC_T_00000596,
oxidoreductase activity, acting on diphenols and related substances as donors	GO:0016679	0.0429648	5.85546	2	8	1062	24874	CAFS_CC_T_00044022,CAFS_CC_T_00152481,
N-acetylgalactosamine-6-phosphate deacetylase activity	GO:0047419	0.0429648	5.85546	2	8	1062	24874	CAFS_CC_T_00057076,CAFS_CC_T_00000596,
iprodione amidohydrolase activity	GO:0018748	0.0429648	5.85546	2	8	1062	24874	CAFS_CC_T_00057076,CAFS_CC_T_00000596,
(3,5-dichlorophenylurea)acetate amidohydrolase activity	GO:0018749	0.0429648	5.85546	2	8	1062	24874	CAFS_CC_T_00057076,CAFS_CC_T_00000596,
UDP-3-O-[3-hydroxymyristoyl] N-acetylglucosamine deacetylase activity	GO:0008759	0.0429648	5.85546	2	8	1062	24874	CAFS_CC_T_00057076,CAFS_CC_T_00000596,
protein tag	GO:0031386	0.0429648	5.85546	2	8	1062	24874	CAFS_CC_T_00243647,CAFS_CC_T_00119741,
obsolete N2-acetyl-L-lysine deacetylase activity	GO:0043747	0.0429648	5.85546	2	8	1062	24874	CAFS_CC_T_00057076,CAFS_CC_T_00000596,
O-succinylbenzoate synthase activity	GO:0043748	0.0429648	5.85546	2	8	1062	24874	CAFS_CC_T_00057076,CAFS_CC_T_00000596,
indoleacetamide hydrolase activity	GO:0043864	0.0429648	5.85546	2	8	1062	24874	CAFS_CC_T_00057076,CAFS_CC_T_00000596,
N-acetylcitrulline deacetylase activity	GO:0043909	0.0429648	5.85546	2	8	1062	24874	CAFS_CC_T_00057076,CAFS_CC_T_00000596,
metallodipeptidase activity	GO:0070573	0.0429648	5.85546	2	8	1062	24874	CAFS_CC_T_00169760,CAFS_CC_T_00073103,
diacetylchitobiose deacetylase activity	GO:0052773	0.0429648	5.85546	2	8	1062	24874	CAFS_CC_T_00057076,CAFS_CC_T_00000596,
chitooligosaccharide deacetylase activity	GO:0052790	0.0429648	5.85546	2	8	1062	24874	CAFS_CC_T_00057076,CAFS_CC_T_00000596,
calcium-induced calcium release activity	GO:0048763	0.0429648	5.85546	2	8	1062	24874	CAFS_CC_T_00060588,CAFS_CC_T_00041831,
4'-(2-hydroxyisopropyl)phenylurea amidohydrolase activity	GO:0034571	0.0429648	5.85546	2	8	1062	24874	CAFS_CC_T_00057076,CAFS_CC_T_00000596,
didemethylisoproturon amidohydrolase activity	GO:0034573	0.0429648	5.85546	2	8	1062	24874	CAFS_CC_T_00057076,CAFS_CC_T_00000596,
N-isopropylacetanilide amidohydrolase activity	GO:0034576	0.0429648	5.85546	2	8	1062	24874	CAFS_CC_T_00057076,CAFS_CC_T_00000596,
N-cyclohexylformamide amidohydrolase activity	GO:0034781	0.0429648	5.85546	2	8	1062	24874	CAFS_CC_T_00057076,CAFS_CC_T_00000596,
peptidyl-lysine modification	GO:0018205	0.0446582	1.59786	16	235	1052	24689	CAFS_CC_T_00034655,CAFS_CC_T_00243647,CAFS_CC_T_00118503,CAFS_CC_T_00012794,CAFS_CC_T_00121859,CAFS_CC_T_00243394,CAFS_CC_T_00000389,CAFS_CC_T_00134746,CAFS_CC_T_00192660,CAFS_CC_T_00133857,CAFS_CC_T_00020244,CAFS_CC_T_00223156,CAFS_CC_T_00057076,CAFS_CC_T_00096656,CAFS_CC_T_00019150,CAFS_CC_T_00119741,
organelle fusion	GO:0048284	0.0446582	1.59786	16	235	1052	24689	CAFS_CC_T_00054759,CAFS_CC_T_00027559,CAFS_CC_T_00189635,CAFS_CC_T_00027182,CAFS_CC_T_00215239,CAFS_CC_T_00219550,CAFS_CC_T_00078224,CAFS_CC_T_00063140,CAFS_CC_T_00159115,CAFS_CC_T_00239238,CAFS_CC_T_00114728,CAFS_CC_T_00105433,CAFS_CC_T_00007242,CAFS_CC_T_00183850,CAFS_CC_T_00182148,CAFS_CC_T_00242267,
positive regulation of neurogenesis	GO:0050769	0.0449446	2.30839	6	61	1052	24689	CAFS_CC_T_00075654,CAFS_CC_T_00228563,CAFS_CC_T_00083504,CAFS_CC_T_00150847,CAFS_CC_T_00218563,CAFS_CC_T_00041930,
chromosome separation	GO:0051304	0.0451211	2.55094	5	46	1052	24689	CAFS_CC_T_00229821,CAFS_CC_T_00168308,CAFS_CC_T_00105245,CAFS_CC_T_00082185,CAFS_CC_T_00060787,
extracellular structure organization	GO:0043062	0.0453809	1.92016	9	110	1052	24689	CAFS_CC_T_00208426,CAFS_CC_T_00231690,CAFS_CC_T_00243304,CAFS_CC_T_00158251,CAFS_CC_T_00060815,CAFS_CC_T_00156578,CAFS_CC_T_00156162,CAFS_CC_T_00227949,CAFS_CC_T_00099280,
external encapsulating structure organization	GO:0045229	0.0453809	1.92016	9	110	1052	24689	CAFS_CC_T_00208426,CAFS_CC_T_00231690,CAFS_CC_T_00243304,CAFS_CC_T_00158251,CAFS_CC_T_00060815,CAFS_CC_T_00156578,CAFS_CC_T_00156162,CAFS_CC_T_00227949,CAFS_CC_T_00099280,
extracellular matrix organization	GO:0030198	0.0453809	1.92016	9	110	1052	24689	CAFS_CC_T_00208426,CAFS_CC_T_00231690,CAFS_CC_T_00243304,CAFS_CC_T_00158251,CAFS_CC_T_00060815,CAFS_CC_T_00156578,CAFS_CC_T_00156162,CAFS_CC_T_00227949,CAFS_CC_T_00099280,
negative regulation of nuclear division	GO:0051784	0.0457232	2.93358	4	32	1052	24689	CAFS_CC_T_00105245,CAFS_CC_T_00025684,CAFS_CC_T_00159178,CAFS_CC_T_00060787,
negative regulation of cell cycle process	GO:0010948	0.046118	1.78038	11	145	1052	24689	CAFS_CC_T_00066739,CAFS_CC_T_00168308,CAFS_CC_T_00105245,CAFS_CC_T_00156497,CAFS_CC_T_00164916,CAFS_CC_T_00243304,CAFS_CC_T_00025684,CAFS_CC_T_00159178,CAFS_CC_T_00192660,CAFS_CC_T_00082185,CAFS_CC_T_00060787,
helicase activity	GO:0004386	0.0471739	1.56146	17	255	1062	24874	CAFS_CC_T_00241902,CAFS_CC_T_00132374,CAFS_CC_T_00141336,CAFS_CC_T_00172989,CAFS_CC_T_00219739,CAFS_CC_T_00051916,CAFS_CC_T_00082673,CAFS_CC_T_00216146,CAFS_CC_T_00045274,CAFS_CC_T_00219263,CAFS_CC_T_00225226,CAFS_CC_T_00117895,CAFS_CC_T_00090943,CAFS_CC_T_00054422,CAFS_CC_T_00046831,CAFS_CC_T_00044661,CAFS_CC_T_00153646,
organelle assembly	GO:0070925	0.0477419	1.31092	41	734	1052	24689	CAFS_CC_T_00247673,CAFS_CC_T_00129163,CAFS_CC_T_00068921,CAFS_CC_T_00082393,CAFS_CC_T_00041872,CAFS_CC_T_00005368,CAFS_CC_T_00033813,CAFS_CC_T_00105245,CAFS_CC_T_00051147,CAFS_CC_T_00006529,CAFS_CC_T_00030266,CAFS_CC_T_00123597,CAFS_CC_T_00156497,CAFS_CC_T_00040427,CAFS_CC_T_00095150,CAFS_CC_T_00077224,CAFS_CC_T_00165855,CAFS_CC_T_00104478,CAFS_CC_T_00065280,CAFS_CC_T_00058530,CAFS_CC_T_00231382,…
regulation of cytoskeleton organization	GO:0051493	0.0478743	1.55846	17	256	1052	24689	CAFS_CC_T_00082393,CAFS_CC_T_00015944,CAFS_CC_T_00104355,CAFS_CC_T_00030266,CAFS_CC_T_00156497,CAFS_CC_T_00040427,CAFS_CC_T_00095150,CAFS_CC_T_00243304,CAFS_CC_T_00014577,CAFS_CC_T_00000389,CAFS_CC_T_00241724,CAFS_CC_T_00135676,CAFS_CC_T_00075833,CAFS_CC_T_00156595,CAFS_CC_T_00060742,CAFS_CC_T_00221774,CAFS_CC_T_00183067,
oxidoreductase activity, acting on the aldehyde or oxo group of donors	GO:0016903	0.0484309	2.26663	6	62	1062	24874	CAFS_CC_T_00066729,CAFS_CC_T_00097034,CAFS_CC_T_00192252,CAFS_CC_T_00066848,CAFS_CC_T_00131357,CAFS_CC_T_00176681,
ion binding	GO:0043167	0.0485187	1.06966	396	8671	1062	24874	CAFS_CC_T_00134996,CAFS_CC_T_00015155,CAFS_CC_T_00208063,CAFS_CC_T_00213429,CAFS_CC_T_00065899,CAFS_CC_T_00119352,CAFS_CC_T_00204934,CAFS_CC_T_00130141,CAFS_CC_T_00054759,CAFS_CC_T_00032944,CAFS_CC_T_00233029,CAFS_CC_T_00055621,CAFS_CC_T_00136710,CAFS_CC_T_00084153,CAFS_CC_T_00225874,CAFS_CC_T_00181702,CAFS_CC_T_00214741,CAFS_CC_T_00191107,CAFS_CC_T_00158924,CAFS_CC_T_00090898,CAFS_CC_T_00038691,…
tubulin binding	GO:0015631	0.0493421	1.47705	21	333	1062	24874	CAFS_CC_T_00005368,CAFS_CC_T_00157661,CAFS_CC_T_00015944,CAFS_CC_T_00105245,CAFS_CC_T_00104355,CAFS_CC_T_00140452,CAFS_CC_T_00045356,CAFS_CC_T_00226471,CAFS_CC_T_00038919,CAFS_CC_T_00014577,CAFS_CC_T_00117302,CAFS_CC_T_00197862,CAFS_CC_T_00135676,CAFS_CC_T_00135299,CAFS_CC_T_00229558,CAFS_CC_T_00165912,CAFS_CC_T_00161152,CAFS_CC_T_00091455,CAFS_CC_T_00120681,CAFS_CC_T_00245712,CAFS_CC_T_00186531,
photoreceptor cell development	GO:0042461	0.0498988	1.88587	9	112	1052	24689	CAFS_CC_T_00042285,CAFS_CC_T_00006529,CAFS_CC_T_00104478,CAFS_CC_T_00195713,CAFS_CC_T_00135299,CAFS_CC_T_00022075,CAFS_CC_T_00177586,CAFS_CC_T_00080277,CAFS_CC_T_00134931,

## Sheet: Enriched terms in HH strain
GO_Name	GO_ID	P_value	EnrichmentScore	HitsGenesCountsInSelectedSet	HitsGenesCountsInBackground	AllGenesCountsInSelectedSet	AllGenesCountsInBackground	GenesOfSelectedSetInGOterm
planar cell polarity pathway involved in axis elongation	GO:0003402	3.93673e-07	22.5842	5	6	911	24689	CAFS_CC_T_00190657,CAFS_CC_T_00028192,CAFS_CC_T_00144218,CAFS_CC_T_00237773,CAFS_CC_T_00113976,
axoneme assembly	GO:0035082	7.41161e-05	5.55918	8	39	911	24689	CAFS_CC_T_00095201,CAFS_CC_T_00055121,CAFS_CC_T_00246070,CAFS_CC_T_00051420,CAFS_CC_T_00220054,CAFS_CC_T_00177586,CAFS_CC_T_00211581,CAFS_CC_T_00179343,
obsolete transcriptional repressor activity, RNA polymerase II transcription factor binding	GO:0001191	0.00022472	19.3723	3	4	963	24874	CAFS_CC_T_00171518,CAFS_CC_T_00076833,CAFS_CC_T_00001401,
microtubule bundle formation	GO:0001578	0.000519137	4.25114	8	51	911	24689	CAFS_CC_T_00095201,CAFS_CC_T_00055121,CAFS_CC_T_00246070,CAFS_CC_T_00051420,CAFS_CC_T_00220054,CAFS_CC_T_00177586,CAFS_CC_T_00211581,CAFS_CC_T_00179343,
microtubule cytoskeleton organization	GO:0000226	0.000878705	1.9114	28	397	911	24689	CAFS_CC_T_00095201,CAFS_CC_T_00138569,CAFS_CC_T_00057396,CAFS_CC_T_00133715,CAFS_CC_T_00055121,CAFS_CC_T_00246070,CAFS_CC_T_00014566,CAFS_CC_T_00227808,CAFS_CC_T_00180248,CAFS_CC_T_00051420,CAFS_CC_T_00095495,CAFS_CC_T_00102757,CAFS_CC_T_00080761,CAFS_CC_T_00221212,CAFS_CC_T_00189929,CAFS_CC_T_00220054,CAFS_CC_T_00177586,CAFS_CC_T_00211581,CAFS_CC_T_00139287,CAFS_CC_T_00079716,CAFS_CC_T_00172718,…
erythrocyte differentiation	GO:0030218	0.00100685	2.50935	15	162	911	24689	CAFS_CC_T_00040184,CAFS_CC_T_00034655,CAFS_CC_T_00195162,CAFS_CC_T_00241060,CAFS_CC_T_00156439,CAFS_CC_T_00035906,CAFS_CC_T_00181084,CAFS_CC_T_00236361,CAFS_CC_T_00112158,CAFS_CC_T_00207379,CAFS_CC_T_00082951,CAFS_CC_T_00101092,CAFS_CC_T_00074499,CAFS_CC_T_00203984,CAFS_CC_T_00184331,
attachment of spindle microtubules to kinetochore involved in meiotic chromosome segregation	GO:0051316	0.0013601	27.101	2	2	911	24689	CAFS_CC_T_00077224,CAFS_CC_T_00200440,
monopolar spindle attachment to meiosis I kinetochore	GO:0051455	0.0013601	27.101	2	2	911	24689	CAFS_CC_T_00077224,CAFS_CC_T_00200440,
smooth endoplasmic reticulum calcium ion homeostasis	GO:0051563	0.0013601	27.101	2	2	911	24689	CAFS_CC_T_00163998,CAFS_CC_T_00044354,
regulation of adenosine receptor signaling pathway	GO:0060167	0.0013601	27.101	2	2	911	24689	CAFS_CC_T_00073491,CAFS_CC_T_00196592,
negative regulation of adenosine receptor signaling pathway	GO:0060169	0.0013601	27.101	2	2	911	24689	CAFS_CC_T_00073491,CAFS_CC_T_00196592,
eurydendroid cell differentiation	GO:0021755	0.0013601	27.101	2	2	911	24689	CAFS_CC_T_00028020,CAFS_CC_T_00146325,
endoplasmic reticulum calcium ion homeostasis	GO:0032469	0.0013601	27.101	2	2	911	24689	CAFS_CC_T_00163998,CAFS_CC_T_00044354,
erythrocyte homeostasis	GO:0034101	0.00136916	2.43422	15	167	911	24689	CAFS_CC_T_00040184,CAFS_CC_T_00034655,CAFS_CC_T_00195162,CAFS_CC_T_00241060,CAFS_CC_T_00156439,CAFS_CC_T_00035906,CAFS_CC_T_00181084,CAFS_CC_T_00236361,CAFS_CC_T_00112158,CAFS_CC_T_00207379,CAFS_CC_T_00082951,CAFS_CC_T_00101092,CAFS_CC_T_00074499,CAFS_CC_T_00203984,CAFS_CC_T_00184331,
vesicle lumen	GO:0031983	0.00141691	26.552	2	2	904	24003	CAFS_CC_T_00073491,CAFS_CC_T_00196592,
cytoplasmic vesicle lumen	GO:0060205	0.00141691	26.552	2	2	904	24003	CAFS_CC_T_00073491,CAFS_CC_T_00196592,
microtubule-based process	GO:0007017	0.00148983	1.63644	41	679	911	24689	CAFS_CC_T_00031238,CAFS_CC_T_00095201,CAFS_CC_T_00190657,CAFS_CC_T_00005368,CAFS_CC_T_00151528,CAFS_CC_T_00138569,CAFS_CC_T_00057396,CAFS_CC_T_00133715,CAFS_CC_T_00055121,CAFS_CC_T_00246070,CAFS_CC_T_00049614,CAFS_CC_T_00241556,CAFS_CC_T_00207251,CAFS_CC_T_00014566,CAFS_CC_T_00165023,CAFS_CC_T_00227808,CAFS_CC_T_00192218,CAFS_CC_T_00180248,CAFS_CC_T_00051420,CAFS_CC_T_00095495,CAFS_CC_T_00102757,…
centromeric DNA binding	GO:0019237	0.00149736	25.8297	2	2	963	24874	CAFS_CC_T_00077224,CAFS_CC_T_00200440,
telomerase holoenzyme complex	GO:0005697	0.0016631	11.3794	3	7	904	24003	CAFS_CC_T_00036795,CAFS_CC_T_00236361,CAFS_CC_T_00157416,
integrin binding	GO:0005178	0.00176034	4.55818	6	34	963	24874	CAFS_CC_T_00194644,CAFS_CC_T_00212603,CAFS_CC_T_00087478,CAFS_CC_T_00240401,CAFS_CC_T_00133459,CAFS_CC_T_00071316,
telomerase RNA binding	GO:0070034	0.00180106	11.0699	3	7	963	24874	CAFS_CC_T_00036795,CAFS_CC_T_00236361,CAFS_CC_T_00157416,
myeloid cell homeostasis	GO:0002262	0.00183505	2.36346	15	172	911	24689	CAFS_CC_T_00040184,CAFS_CC_T_00034655,CAFS_CC_T_00195162,CAFS_CC_T_00241060,CAFS_CC_T_00156439,CAFS_CC_T_00035906,CAFS_CC_T_00181084,CAFS_CC_T_00236361,CAFS_CC_T_00112158,CAFS_CC_T_00207379,CAFS_CC_T_00082951,CAFS_CC_T_00101092,CAFS_CC_T_00074499,CAFS_CC_T_00203984,CAFS_CC_T_00184331,
cilium organization	GO:0044782	0.00242187	1.91203	23	326	911	24689	CAFS_CC_T_00096140,CAFS_CC_T_00031238,CAFS_CC_T_00240628,CAFS_CC_T_00095201,CAFS_CC_T_00005368,CAFS_CC_T_00031648,CAFS_CC_T_00207128,CAFS_CC_T_00055121,CAFS_CC_T_00025290,CAFS_CC_T_00095150,CAFS_CC_T_00246070,CAFS_CC_T_00235729,CAFS_CC_T_00192218,CAFS_CC_T_00051420,CAFS_CC_T_00064302,CAFS_CC_T_00104572,CAFS_CC_T_00114381,CAFS_CC_T_00227940,CAFS_CC_T_00220054,CAFS_CC_T_00177586,CAFS_CC_T_00211581,…
regulation of Wnt signaling pathway, planar cell polarity pathway	GO:2000095	0.00243972	10.1629	3	8	911	24689	CAFS_CC_T_00190657,CAFS_CC_T_00237773,CAFS_CC_T_00113976,
microtubule nucleation by interphase microtubule organizing center	GO:0051415	0.00243972	10.1629	3	8	911	24689	CAFS_CC_T_00138569,CAFS_CC_T_00102757,CAFS_CC_T_00232861,
microtubule nucleation by microtubule organizing center	GO:0051418	0.00243972	10.1629	3	8	911	24689	CAFS_CC_T_00138569,CAFS_CC_T_00102757,CAFS_CC_T_00232861,
cilium assembly	GO:0060271	0.00255909	1.93578	22	308	911	24689	CAFS_CC_T_00096140,CAFS_CC_T_00031238,CAFS_CC_T_00240628,CAFS_CC_T_00095201,CAFS_CC_T_00005368,CAFS_CC_T_00031648,CAFS_CC_T_00207128,CAFS_CC_T_00055121,CAFS_CC_T_00025290,CAFS_CC_T_00095150,CAFS_CC_T_00246070,CAFS_CC_T_00192218,CAFS_CC_T_00051420,CAFS_CC_T_00064302,CAFS_CC_T_00104572,CAFS_CC_T_00114381,CAFS_CC_T_00227940,CAFS_CC_T_00220054,CAFS_CC_T_00177586,CAFS_CC_T_00211581,CAFS_CC_T_00179343,…
equatorial microtubule organizing center	GO:0000923	0.00258661	9.957	3	8	904	24003	CAFS_CC_T_00138569,CAFS_CC_T_00102757,CAFS_CC_T_00232861,
telomeric DNA binding	GO:0042162	0.00279832	6.45742	4	16	963	24874	CAFS_CC_T_00036795,CAFS_CC_T_00236361,CAFS_CC_T_00157416,CAFS_CC_T_00065992,
microtubule minus-end binding	GO:0051011	0.00279893	9.68614	3	8	963	24874	CAFS_CC_T_00138569,CAFS_CC_T_00102757,CAFS_CC_T_00232861,
centrosome duplication	GO:0051298	0.00286358	3.64821	7	52	911	24689	CAFS_CC_T_00138569,CAFS_CC_T_00057396,CAFS_CC_T_00180248,CAFS_CC_T_00102757,CAFS_CC_T_00079716,CAFS_CC_T_00232861,CAFS_CC_T_00183066,
centrosome cycle	GO:0007098	0.00288402	3.28497	8	66	911	24689	CAFS_CC_T_00138569,CAFS_CC_T_00057396,CAFS_CC_T_00180248,CAFS_CC_T_00102757,CAFS_CC_T_00139287,CAFS_CC_T_00079716,CAFS_CC_T_00232861,CAFS_CC_T_00183066,
cilium movement	GO:0003341	0.00295464	3.01122	9	81	911	24689	CAFS_CC_T_00031238,CAFS_CC_T_00190657,CAFS_CC_T_00151528,CAFS_CC_T_00207251,CAFS_CC_T_00165023,CAFS_CC_T_00192218,CAFS_CC_T_00051420,CAFS_CC_T_00211581,CAFS_CC_T_00179343,
nucleoside catabolic process	GO:0009164	0.0029835	6.3767	4	17	911	24689	CAFS_CC_T_00073491,CAFS_CC_T_00054608,CAFS_CC_T_00196592,CAFS_CC_T_00177084,
nucleobase-containing small molecule catabolic process	GO:0034656	0.0029835	6.3767	4	17	911	24689	CAFS_CC_T_00073491,CAFS_CC_T_00054608,CAFS_CC_T_00196592,CAFS_CC_T_00177084,
purine ribonucleoside metabolic process	GO:0046128	0.0029835	6.3767	4	17	911	24689	CAFS_CC_T_00073491,CAFS_CC_T_00196592,CAFS_CC_T_00008600,CAFS_CC_T_00136142,
basement membrane organization	GO:0071711	0.0029835	6.3767	4	17	911	24689	CAFS_CC_T_00046690,CAFS_CC_T_00183135,CAFS_CC_T_00060815,CAFS_CC_T_00099280,
meiotic cell cycle	GO:0051321	0.00330333	2.61501	11	114	911	24689	CAFS_CC_T_00220971,CAFS_CC_T_00246070,CAFS_CC_T_00235729,CAFS_CC_T_00077224,CAFS_CC_T_00182410,CAFS_CC_T_00059384,CAFS_CC_T_00082185,CAFS_CC_T_00190106,CAFS_CC_T_00065992,CAFS_CC_T_00069470,CAFS_CC_T_00200440,
kinetochore assembly	GO:0051382	0.00355957	9.03366	3	9	911	24689	CAFS_CC_T_00077224,CAFS_CC_T_00059396,CAFS_CC_T_00200440,
kinetochore organization	GO:0051383	0.00355957	9.03366	3	9	911	24689	CAFS_CC_T_00077224,CAFS_CC_T_00059396,CAFS_CC_T_00200440,
glycosyl compound catabolic process	GO:1901658	0.00372505	6.02244	4	18	911	24689	CAFS_CC_T_00073491,CAFS_CC_T_00054608,CAFS_CC_T_00196592,CAFS_CC_T_00177084,
purine nucleoside metabolic process	GO:0042278	0.00372505	6.02244	4	18	911	24689	CAFS_CC_T_00073491,CAFS_CC_T_00196592,CAFS_CC_T_00008600,CAFS_CC_T_00136142,
homeostasis of number of cells	GO:0048872	0.00375041	2.0753	17	222	911	24689	CAFS_CC_T_00100737,CAFS_CC_T_00040184,CAFS_CC_T_00239161,CAFS_CC_T_00034655,CAFS_CC_T_00195162,CAFS_CC_T_00241060,CAFS_CC_T_00156439,CAFS_CC_T_00035906,CAFS_CC_T_00181084,CAFS_CC_T_00236361,CAFS_CC_T_00112158,CAFS_CC_T_00207379,CAFS_CC_T_00082951,CAFS_CC_T_00101092,CAFS_CC_T_00074499,CAFS_CC_T_00203984,CAFS_CC_T_00184331,
GARP complex	GO:0000938	0.00377172	8.85066	3	9	904	24003	CAFS_CC_T_00126923,CAFS_CC_T_00010566,CAFS_CC_T_00093181,
amyloid-beta metabolic process	GO:0050435	0.00398014	18.0673	2	3	911	24689	CAFS_CC_T_00163998,CAFS_CC_T_00044354,
amyloid-beta formation	GO:0034205	0.00398014	18.0673	2	3	911	24689	CAFS_CC_T_00163998,CAFS_CC_T_00044354,
interferon-beta production	GO:0032608	0.00398014	18.0673	2	3	911	24689	CAFS_CC_T_00066483,CAFS_CC_T_00074499,
regulation of interferon-beta production	GO:0032648	0.00398014	18.0673	2	3	911	24689	CAFS_CC_T_00066483,CAFS_CC_T_00074499,
positive regulation of interferon-beta production	GO:0032728	0.00398014	18.0673	2	3	911	24689	CAFS_CC_T_00066483,CAFS_CC_T_00074499,
meiosis I	GO:0007127	0.00437286	3.38762	7	56	911	24689	CAFS_CC_T_00220971,CAFS_CC_T_00077224,CAFS_CC_T_00182410,CAFS_CC_T_00059384,CAFS_CC_T_00065992,CAFS_CC_T_00069470,CAFS_CC_T_00200440,
glutaminase activity	GO:0004359	0.00442381	5.73993	4	18	963	24874	CAFS_CC_T_00237585,CAFS_CC_T_00068623,CAFS_CC_T_00189163,CAFS_CC_T_00191919,
carbohydrate derivative catabolic process	GO:1901136	0.00444385	2.65696	10	102	911	24689	CAFS_CC_T_00073491,CAFS_CC_T_00171171,CAFS_CC_T_00001714,CAFS_CC_T_00238475,CAFS_CC_T_00054608,CAFS_CC_T_00196592,CAFS_CC_T_00177084,CAFS_CC_T_00159650,CAFS_CC_T_00229263,CAFS_CC_T_00194132,
otolith morphogenesis	GO:0032474	0.00447492	4.51683	5	30	911	24689	CAFS_CC_T_00043648,CAFS_CC_T_00207128,CAFS_CC_T_00032406,CAFS_CC_T_00148561,CAFS_CC_T_00235841,
peptidase activity	GO:0008233	0.00463254	1.3992	63	1163	963	24874	CAFS_CC_T_00189221,CAFS_CC_T_00225867,CAFS_CC_T_00233480,CAFS_CC_T_00126904,CAFS_CC_T_00179853,CAFS_CC_T_00088558,CAFS_CC_T_00068980,CAFS_CC_T_00058700,CAFS_CC_T_00023603,CAFS_CC_T_00216526,CAFS_CC_T_00073481,CAFS_CC_T_00034696,CAFS_CC_T_00163998,CAFS_CC_T_00045387,CAFS_CC_T_00116727,CAFS_CC_T_00162600,CAFS_CC_T_00191154,CAFS_CC_T_00144857,CAFS_CC_T_00164003,CAFS_CC_T_00015467,CAFS_CC_T_00211383,…
nucleobase metabolic process	GO:0009112	0.00482977	3.32819	7	57	911	24689	CAFS_CC_T_00073491,CAFS_CC_T_00182677,CAFS_CC_T_00001299,CAFS_CC_T_00054608,CAFS_CC_T_00196592,CAFS_CC_T_00177084,CAFS_CC_T_00182973,
meiosis I cell cycle process	GO:0061982	0.00482977	3.32819	7	57	911	24689	CAFS_CC_T_00220971,CAFS_CC_T_00077224,CAFS_CC_T_00182410,CAFS_CC_T_00059384,CAFS_CC_T_00065992,CAFS_CC_T_00069470,CAFS_CC_T_00200440,
motor neuron migration	GO:0097475	0.00494641	8.1303	3	10	911	24689	CAFS_CC_T_00058035,CAFS_CC_T_00237773,CAFS_CC_T_00113976,
photoreceptor cell differentiation	GO:0046530	0.0049962	2.27299	13	155	911	24689	CAFS_CC_T_00133715,CAFS_CC_T_00055121,CAFS_CC_T_00046679,CAFS_CC_T_00175505,CAFS_CC_T_00012299,CAFS_CC_T_00163358,CAFS_CC_T_00233649,CAFS_CC_T_00114381,CAFS_CC_T_00227940,CAFS_CC_T_00177586,CAFS_CC_T_00081161,CAFS_CC_T_00232861,CAFS_CC_T_00080277,
spindle pole body	GO:0005816	0.00523822	7.9656	3	10	904	24003	CAFS_CC_T_00138569,CAFS_CC_T_00102757,CAFS_CC_T_00232861,
elongator holoenzyme complex	GO:0033588	0.00523822	7.9656	3	10	904	24003	CAFS_CC_T_00171518,CAFS_CC_T_00001401,CAFS_CC_T_00149542,
meiotic cell cycle process	GO:1903046	0.00555234	2.74055	9	89	911	24689	CAFS_CC_T_00220971,CAFS_CC_T_00077224,CAFS_CC_T_00182410,CAFS_CC_T_00059384,CAFS_CC_T_00082185,CAFS_CC_T_00190106,CAFS_CC_T_00065992,CAFS_CC_T_00069470,CAFS_CC_T_00200440,
mesodermal cell fate specification	GO:0007501	0.00556263	5.4202	4	20	911	24689	CAFS_CC_T_00046720,CAFS_CC_T_00138281,CAFS_CC_T_00064302,CAFS_CC_T_00028149,
gamma-tubulin binding	GO:0043015	0.00565916	7.74891	3	10	963	24874	CAFS_CC_T_00138569,CAFS_CC_T_00102757,CAFS_CC_T_00232861,
histamine receptor activity	GO:0004969	0.00565916	7.74891	3	10	963	24874	CAFS_CC_T_00028843,CAFS_CC_T_00054203,CAFS_CC_T_00012106,
vacuolar transport	GO:0007034	0.00641709	2.68032	9	91	911	24689	CAFS_CC_T_00126923,CAFS_CC_T_00196448,CAFS_CC_T_00010566,CAFS_CC_T_00146717,CAFS_CC_T_00089981,CAFS_CC_T_00093181,CAFS_CC_T_00059648,CAFS_CC_T_00242662,CAFS_CC_T_00158059,
renal system process	GO:0003014	0.00660274	3.53491	6	46	911	24689	CAFS_CC_T_00031238,CAFS_CC_T_00154601,CAFS_CC_T_00245233,CAFS_CC_T_00114381,CAFS_CC_T_00121107,CAFS_CC_T_00215540,
protein targeting to vacuole	GO:0006623	0.00667367	5.16209	4	21	911	24689	CAFS_CC_T_00196448,CAFS_CC_T_00089981,CAFS_CC_T_00242662,CAFS_CC_T_00158059,
oxidoreductase activity, acting on CH-OH group of donors	GO:0016614	0.00692058	1.9965	16	207	963	24874	CAFS_CC_T_00150192,CAFS_CC_T_00161712,CAFS_CC_T_00240665,CAFS_CC_T_00126565,CAFS_CC_T_00128743,CAFS_CC_T_00080976,CAFS_CC_T_00238475,CAFS_CC_T_00079893,CAFS_CC_T_00072826,CAFS_CC_T_00127188,CAFS_CC_T_00159650,CAFS_CC_T_00161928,CAFS_CC_T_00003721,CAFS_CC_T_00210938,CAFS_CC_T_00166039,CAFS_CC_T_00122923,
telomere maintenance via recombination	GO:0000722	0.00776548	13.5505	2	4	911	24689	CAFS_CC_T_00173736,CAFS_CC_T_00065992,
amyloid precursor protein catabolic process	GO:0042987	0.00776548	13.5505	2	4	911	24689	CAFS_CC_T_00163998,CAFS_CC_T_00044354,
beta-alanine metabolic process	GO:0019482	0.00776548	13.5505	2	4	911	24689	CAFS_CC_T_00054608,CAFS_CC_T_00177084,
beta-alanine biosynthetic process	GO:0019483	0.00776548	13.5505	2	4	911	24689	CAFS_CC_T_00054608,CAFS_CC_T_00177084,
protein retention in Golgi apparatus	GO:0045053	0.00776548	13.5505	2	4	911	24689	CAFS_CC_T_00196448,CAFS_CC_T_00242662,
negative regulation of G protein-coupled receptor signaling pathway	GO:0045744	0.00776548	13.5505	2	4	911	24689	CAFS_CC_T_00073491,CAFS_CC_T_00196592,
NADH metabolic process	GO:0006734	0.00776548	13.5505	2	4	911	24689	CAFS_CC_T_00127188,CAFS_CC_T_00159650,
cell adhesion molecule binding	GO:0050839	0.0078271	2.32891	11	122	963	24874	CAFS_CC_T_00194644,CAFS_CC_T_00163998,CAFS_CC_T_00128417,CAFS_CC_T_00212603,CAFS_CC_T_00044354,CAFS_CC_T_00087478,CAFS_CC_T_00240401,CAFS_CC_T_00133459,CAFS_CC_T_00158426,CAFS_CC_T_00050884,CAFS_CC_T_00071316,
endocytosis	GO:0006897	0.00783667	1.75877	22	339	911	24689	CAFS_CC_T_00213463,CAFS_CC_T_00144768,CAFS_CC_T_00031238,CAFS_CC_T_00077812,CAFS_CC_T_00015172,CAFS_CC_T_00200938,CAFS_CC_T_00069377,CAFS_CC_T_00153753,CAFS_CC_T_00119449,CAFS_CC_T_00245233,CAFS_CC_T_00022515,CAFS_CC_T_00166362,CAFS_CC_T_00064302,CAFS_CC_T_00084356,CAFS_CC_T_00095495,CAFS_CC_T_00078055,CAFS_CC_T_00121107,CAFS_CC_T_00145951,CAFS_CC_T_00166039,CAFS_CC_T_00098423,CAFS_CC_T_00239060,…
mitotic recombination	GO:0006312	0.00792223	4.92745	4	22	911	24689	CAFS_CC_T_00173736,CAFS_CC_T_00182410,CAFS_CC_T_00044661,CAFS_CC_T_00065992,
microtubule nucleation	GO:0007020	0.00792223	4.92745	4	22	911	24689	CAFS_CC_T_00138569,CAFS_CC_T_00102757,CAFS_CC_T_00139287,CAFS_CC_T_00232861,
meiotic nuclear division	GO:0140013	0.00801272	2.77959	8	78	911	24689	CAFS_CC_T_00220971,CAFS_CC_T_00077224,CAFS_CC_T_00182410,CAFS_CC_T_00059384,CAFS_CC_T_00082185,CAFS_CC_T_00065992,CAFS_CC_T_00069470,CAFS_CC_T_00200440,
galanin receptor binding	GO:0031763	0.00852805	12.9148	2	4	963	24874	CAFS_CC_T_00139459,CAFS_CC_T_00215540,
sodium:sulfate symporter activity	GO:0015382	0.00852805	12.9148	2	4	963	24874	CAFS_CC_T_00217888,CAFS_CC_T_00091666,
purine nucleoside biosynthetic process	GO:0042451	0.00858192	6.77525	3	12	911	24689	CAFS_CC_T_00073491,CAFS_CC_T_00196592,CAFS_CC_T_00008600,
purine ribonucleoside biosynthetic process	GO:0046129	0.00858192	6.77525	3	12	911	24689	CAFS_CC_T_00073491,CAFS_CC_T_00196592,CAFS_CC_T_00008600,
Golgi to vacuole transport	GO:0006896	0.00858192	6.77525	3	12	911	24689	CAFS_CC_T_00126923,CAFS_CC_T_00010566,CAFS_CC_T_00093181,
nucleate erythrocyte development	GO:0048823	0.00858192	6.77525	3	12	911	24689	CAFS_CC_T_00034655,CAFS_CC_T_00195162,CAFS_CC_T_00112158,
meiotic chromosome segregation	GO:0045132	0.00876269	3.87157	5	35	911	24689	CAFS_CC_T_00077224,CAFS_CC_T_00059384,CAFS_CC_T_00082185,CAFS_CC_T_00069470,CAFS_CC_T_00200440,
gamma-tubulin complex	GO:0000930	0.00907787	6.638	3	12	904	24003	CAFS_CC_T_00138569,CAFS_CC_T_00102757,CAFS_CC_T_00232861,
erythrocyte development	GO:0048821	0.00909895	2.96417	7	64	911	24689	CAFS_CC_T_00040184,CAFS_CC_T_00034655,CAFS_CC_T_00195162,CAFS_CC_T_00241060,CAFS_CC_T_00236361,CAFS_CC_T_00112158,CAFS_CC_T_00203984,
dicarboxylic acid metabolic process	GO:0043648	0.00929327	2.7101	8	80	911	24689	CAFS_CC_T_00233024,CAFS_CC_T_00051262,CAFS_CC_T_00182677,CAFS_CC_T_00026163,CAFS_CC_T_00234800,CAFS_CC_T_00127188,CAFS_CC_T_00068623,CAFS_CC_T_00189163,
microtubule organizing center organization	GO:0031023	0.00929327	2.7101	8	80	911	24689	CAFS_CC_T_00138569,CAFS_CC_T_00057396,CAFS_CC_T_00180248,CAFS_CC_T_00102757,CAFS_CC_T_00139287,CAFS_CC_T_00079716,CAFS_CC_T_00232861,CAFS_CC_T_00183066,
spindle pole	GO:0000922	0.00969728	2.68881	8	79	904	24003	CAFS_CC_T_00138569,CAFS_CC_T_00198692,CAFS_CC_T_00216693,CAFS_CC_T_00188582,CAFS_CC_T_00102757,CAFS_CC_T_00069080,CAFS_CC_T_00232861,CAFS_CC_T_00192387,
homophilic cell adhesion via plasma membrane adhesion molecules	GO:0007156	0.00974538	2.02895	14	187	911	24689	CAFS_CC_T_00233839,CAFS_CC_T_00179910,CAFS_CC_T_00196898,CAFS_CC_T_00078669,CAFS_CC_T_00214460,CAFS_CC_T_00128417,CAFS_CC_T_00014566,CAFS_CC_T_00169467,CAFS_CC_T_00137423,CAFS_CC_T_00114381,CAFS_CC_T_00193647,CAFS_CC_T_00145951,CAFS_CC_T_00158426,CAFS_CC_T_00050884,
cerebellum development	GO:0021549	0.0107114	2.87435	7	66	911	24689	CAFS_CC_T_00054749,CAFS_CC_T_00028020,CAFS_CC_T_00180062,CAFS_CC_T_00079068,CAFS_CC_T_00146325,CAFS_CC_T_00071889,CAFS_CC_T_00081161,
nuclease activity	GO:0004518	0.0107412	1.86061	17	236	963	24874	CAFS_CC_T_00057850,CAFS_CC_T_00179492,CAFS_CC_T_00229893,CAFS_CC_T_00164418,CAFS_CC_T_00071609,CAFS_CC_T_00206395,CAFS_CC_T_00036795,CAFS_CC_T_00211004,CAFS_CC_T_00108443,CAFS_CC_T_00066556,CAFS_CC_T_00182410,CAFS_CC_T_00188183,CAFS_CC_T_00157416,CAFS_CC_T_00232724,CAFS_CC_T_00190106,CAFS_CC_T_00065992,CAFS_CC_T_00069470,
anion:anion antiporter activity	GO:0015301	0.0109832	4.49212	4	23	963	24874	CAFS_CC_T_00215633,CAFS_CC_T_00200972,CAFS_CC_T_00207379,CAFS_CC_T_00055293,
solute:anion antiporter activity	GO:0140323	0.0109832	4.49212	4	23	963	24874	CAFS_CC_T_00215633,CAFS_CC_T_00200972,CAFS_CC_T_00207379,CAFS_CC_T_00055293,
purine nucleobase metabolic process	GO:0006144	0.0110776	3.6623	5	37	911	24689	CAFS_CC_T_00073491,CAFS_CC_T_00182677,CAFS_CC_T_00001299,CAFS_CC_T_00196592,CAFS_CC_T_00182973,
aspartic endopeptidase activity, intramembrane cleaving	GO:0042500	0.0123676	5.9607	3	13	963	24874	CAFS_CC_T_00163998,CAFS_CC_T_00044354,CAFS_CC_T_00043358,
regulation of endocytosis	GO:0030100	0.0125218	2.78981	7	68	911	24689	CAFS_CC_T_00213463,CAFS_CC_T_00015172,CAFS_CC_T_00069377,CAFS_CC_T_00064302,CAFS_CC_T_00084356,CAFS_CC_T_00095495,CAFS_CC_T_00078055,
mesodermal cell fate commitment	GO:0001710	0.0125554	4.33616	4	25	911	24689	CAFS_CC_T_00046720,CAFS_CC_T_00138281,CAFS_CC_T_00064302,CAFS_CC_T_00028149,
establishment of protein localization to vacuole	GO:0072666	0.0125554	4.33616	4	25	911	24689	CAFS_CC_T_00196448,CAFS_CC_T_00089981,CAFS_CC_T_00242662,CAFS_CC_T_00158059,
hypoxanthine salvage	GO:0043103	0.0126267	10.8404	2	5	911	24689	CAFS_CC_T_00073491,CAFS_CC_T_00196592,
uracil metabolic process	GO:0019860	0.0126267	10.8404	2	5	911	24689	CAFS_CC_T_00054608,CAFS_CC_T_00177084,
gall bladder development	GO:0061010	0.0126267	10.8404	2	5	911	24689	CAFS_CC_T_00190106,CAFS_CC_T_00069470,
renal absorption	GO:0070293	0.0126267	10.8404	2	5	911	24689	CAFS_CC_T_00245233,CAFS_CC_T_00121107,
hypoxanthine biosynthetic process	GO:0046101	0.0126267	10.8404	2	5	911	24689	CAFS_CC_T_00073491,CAFS_CC_T_00196592,
inosine metabolic process	GO:0046102	0.0126267	10.8404	2	5	911	24689	CAFS_CC_T_00073491,CAFS_CC_T_00196592,
inosine biosynthetic process	GO:0046103	0.0126267	10.8404	2	5	911	24689	CAFS_CC_T_00073491,CAFS_CC_T_00196592,
deoxyribonucleoside catabolic process	GO:0046121	0.0126267	10.8404	2	5	911	24689	CAFS_CC_T_00054608,CAFS_CC_T_00177084,
pyrimidine deoxyribonucleoside catabolic process	GO:0046127	0.0126267	10.8404	2	5	911	24689	CAFS_CC_T_00054608,CAFS_CC_T_00177084,
purine ribonucleoside catabolic process	GO:0046130	0.0126267	10.8404	2	5	911	24689	CAFS_CC_T_00073491,CAFS_CC_T_00196592,
adenosine catabolic process	GO:0006154	0.0126267	10.8404	2	5	911	24689	CAFS_CC_T_00073491,CAFS_CC_T_00196592,
pyrimidine nucleobase catabolic process	GO:0006208	0.0126267	10.8404	2	5	911	24689	CAFS_CC_T_00054608,CAFS_CC_T_00177084,
uracil catabolic process	GO:0006212	0.0126267	10.8404	2	5	911	24689	CAFS_CC_T_00054608,CAFS_CC_T_00177084,
thymidine catabolic process	GO:0006214	0.0126267	10.8404	2	5	911	24689	CAFS_CC_T_00054608,CAFS_CC_T_00177084,
valyl-tRNA aminoacylation	GO:0006438	0.0126267	10.8404	2	5	911	24689	CAFS_CC_T_00000456,CAFS_CC_T_00002312,
cellular nitrogen compound catabolic process	GO:0044270	0.0127246	1.73169	20	313	911	24689	CAFS_CC_T_00229893,CAFS_CC_T_00073491,CAFS_CC_T_00207131,CAFS_CC_T_00071609,CAFS_CC_T_00026163,CAFS_CC_T_00001714,CAFS_CC_T_00054608,CAFS_CC_T_00196592,CAFS_CC_T_00045274,CAFS_CC_T_00036795,CAFS_CC_T_00067463,CAFS_CC_T_00066556,CAFS_CC_T_00177084,CAFS_CC_T_00157416,CAFS_CC_T_00196215,CAFS_CC_T_00133086,CAFS_CC_T_00138370,CAFS_CC_T_00182973,CAFS_CC_T_00159374,CAFS_CC_T_00229263,
catalytic activity, acting on a nucleic acid	GO:0140640	0.0131267	1.39463	48	889	963	24874	CAFS_CC_T_00241902,CAFS_CC_T_00147414,CAFS_CC_T_00022718,CAFS_CC_T_00229893,CAFS_CC_T_00000456,CAFS_CC_T_00024884,CAFS_CC_T_00012408,CAFS_CC_T_00240136,CAFS_CC_T_00164418,CAFS_CC_T_00071609,CAFS_CC_T_00203726,CAFS_CC_T_00079923,CAFS_CC_T_00172989,CAFS_CC_T_00198745,CAFS_CC_T_00216146,CAFS_CC_T_00045274,CAFS_CC_T_00206395,CAFS_CC_T_00067441,CAFS_CC_T_00036795,CAFS_CC_T_00211004,CAFS_CC_T_00188598,…
cargo receptor activity	GO:0038024	0.0137298	2.37212	9	98	963	24874	CAFS_CC_T_00057850,CAFS_CC_T_00179492,CAFS_CC_T_00217427,CAFS_CC_T_00089390,CAFS_CC_T_00119449,CAFS_CC_T_00214572,CAFS_CC_T_00082119,CAFS_CC_T_00166039,CAFS_CC_T_00082811,
dihydropyrimidine dehydrogenase (NADP+) activity	GO:0017113	0.0138497	10.3319	2	5	963	24874	CAFS_CC_T_00054608,CAFS_CC_T_00177084,
valine-tRNA ligase activity	GO:0004832	0.0138497	10.3319	2	5	963	24874	CAFS_CC_T_00000456,CAFS_CC_T_00002312,
plasma membrane bounded cell projection assembly	GO:0120031	0.0140073	1.62606	24	400	911	24689	CAFS_CC_T_00096140,CAFS_CC_T_00031238,CAFS_CC_T_00182672,CAFS_CC_T_00240628,CAFS_CC_T_00095201,CAFS_CC_T_00005368,CAFS_CC_T_00031648,CAFS_CC_T_00207128,CAFS_CC_T_00055121,CAFS_CC_T_00025290,CAFS_CC_T_00158692,CAFS_CC_T_00095150,CAFS_CC_T_00246070,CAFS_CC_T_00192218,CAFS_CC_T_00051420,CAFS_CC_T_00064302,CAFS_CC_T_00104572,CAFS_CC_T_00114381,CAFS_CC_T_00227940,CAFS_CC_T_00220054,CAFS_CC_T_00177586,…
motile cilium	GO:0031514	0.0142954	3.00589	6	53	904	24003	CAFS_CC_T_00005368,CAFS_CC_T_00151528,CAFS_CC_T_00246070,CAFS_CC_T_00235729,CAFS_CC_T_00211581,CAFS_CC_T_00179343,
regulation of non-canonical Wnt signaling pathway	GO:2000050	0.0144141	4.16938	4	26	911	24689	CAFS_CC_T_00190657,CAFS_CC_T_00170936,CAFS_CC_T_00237773,CAFS_CC_T_00113976,
neural plate development	GO:0001840	0.0144141	4.16938	4	26	911	24689	CAFS_CC_T_00125608,CAFS_CC_T_00064302,CAFS_CC_T_00084356,CAFS_CC_T_00095495,
receptor-mediated endocytosis	GO:0006898	0.0149853	2.22139	10	122	911	24689	CAFS_CC_T_00077812,CAFS_CC_T_00015172,CAFS_CC_T_00200938,CAFS_CC_T_00119449,CAFS_CC_T_00245233,CAFS_CC_T_00064302,CAFS_CC_T_00084356,CAFS_CC_T_00121107,CAFS_CC_T_00166039,CAFS_CC_T_00082811,
ferrous iron binding	GO:0008198	0.0152941	5.53494	3	14	963	24874	CAFS_CC_T_00026163,CAFS_CC_T_00220331,CAFS_CC_T_00233649,
hydrolase activity, acting on carbon-nitrogen (but not peptide) bonds	GO:0016810	0.0162538	1.90324	14	190	963	24874	CAFS_CC_T_00073491,CAFS_CC_T_00239669,CAFS_CC_T_00068069,CAFS_CC_T_00182677,CAFS_CC_T_00237585,CAFS_CC_T_00234800,CAFS_CC_T_00196592,CAFS_CC_T_00196215,CAFS_CC_T_00068623,CAFS_CC_T_00123721,CAFS_CC_T_00189163,CAFS_CC_T_00240978,CAFS_CC_T_00182973,CAFS_CC_T_00191919,
nucleate erythrocyte differentiation	GO:0043363	0.0163468	5.4202	3	15	911	24689	CAFS_CC_T_00034655,CAFS_CC_T_00195162,CAFS_CC_T_00112158,
cell projection assembly	GO:0030031	0.0164837	1.60203	24	406	911	24689	CAFS_CC_T_00096140,CAFS_CC_T_00031238,CAFS_CC_T_00182672,CAFS_CC_T_00240628,CAFS_CC_T_00095201,CAFS_CC_T_00005368,CAFS_CC_T_00031648,CAFS_CC_T_00207128,CAFS_CC_T_00055121,CAFS_CC_T_00025290,CAFS_CC_T_00158692,CAFS_CC_T_00095150,CAFS_CC_T_00246070,CAFS_CC_T_00192218,CAFS_CC_T_00051420,CAFS_CC_T_00064302,CAFS_CC_T_00104572,CAFS_CC_T_00114381,CAFS_CC_T_00227940,CAFS_CC_T_00220054,CAFS_CC_T_00177586,…
regulation of animal organ morphogenesis	GO:2000027	0.0167855	2.63482	7	72	911	24689	CAFS_CC_T_00190657,CAFS_CC_T_00064302,CAFS_CC_T_00028192,CAFS_CC_T_00144218,CAFS_CC_T_00237773,CAFS_CC_T_00028149,CAFS_CC_T_00113976,
embryonic organ development	GO:0048568	0.0177924	1.35913	50	997	911	24689	CAFS_CC_T_00096132,CAFS_CC_T_00043648,CAFS_CC_T_00118473,CAFS_CC_T_00046720,CAFS_CC_T_00040184,CAFS_CC_T_00031238,CAFS_CC_T_00022718,CAFS_CC_T_00028020,CAFS_CC_T_00125608,CAFS_CC_T_00031186,CAFS_CC_T_00019012,CAFS_CC_T_00068069,CAFS_CC_T_00240136,CAFS_CC_T_00076903,CAFS_CC_T_00208469,CAFS_CC_T_00207128,CAFS_CC_T_00133715,CAFS_CC_T_00241060,CAFS_CC_T_00156439,CAFS_CC_T_00025290,CAFS_CC_T_00049689,…
male gamete generation	GO:0048232	0.0180793	2.40898	8	90	911	24689	CAFS_CC_T_00129625,CAFS_CC_T_00246070,CAFS_CC_T_00189852,CAFS_CC_T_00236361,CAFS_CC_T_00059384,CAFS_CC_T_00082185,CAFS_CC_T_00074499,CAFS_CC_T_00050884,
cell-cell adhesion via plasma-membrane adhesion molecules	GO:0098742	0.0181945	1.83115	15	222	911	24689	CAFS_CC_T_00233839,CAFS_CC_T_00179910,CAFS_CC_T_00196898,CAFS_CC_T_00078669,CAFS_CC_T_00214460,CAFS_CC_T_00128417,CAFS_CC_T_00014566,CAFS_CC_T_00169467,CAFS_CC_T_00137423,CAFS_CC_T_00114381,CAFS_CC_T_00193647,CAFS_CC_T_00145951,CAFS_CC_T_00158426,CAFS_CC_T_00050884,CAFS_CC_T_00243118,
attachment of mitotic spindle microtubules to kinetochore	GO:0051315	0.0184796	9.03366	2	6	911	24689	CAFS_CC_T_00077224,CAFS_CC_T_00200440,
hepatic duct development	GO:0061011	0.0184796	9.03366	2	6	911	24689	CAFS_CC_T_00190106,CAFS_CC_T_00069470,
protein kinase C signaling	GO:0070528	0.0184796	9.03366	2	6	911	24689	CAFS_CC_T_00159650,CAFS_CC_T_00095495,
purine nucleoside catabolic process	GO:0006152	0.0184796	9.03366	2	6	911	24689	CAFS_CC_T_00073491,CAFS_CC_T_00196592,
protein targeting to lysosome	GO:0006622	0.0184796	9.03366	2	6	911	24689	CAFS_CC_T_00089981,CAFS_CC_T_00158059,
regulation of protein kinase C signaling	GO:0090036	0.0184796	9.03366	2	6	911	24689	CAFS_CC_T_00159650,CAFS_CC_T_00095495,
endonuclease activity, active with either ribo- or deoxyribonucleic acids and producing 3'-phosphomonoesters	GO:0016894	0.0185764	5.16594	3	15	963	24874	CAFS_CC_T_00206395,CAFS_CC_T_00190106,CAFS_CC_T_00069470,
positive regulation of calcium ion-dependent exocytosis	GO:0045956	0.018631	3.87157	4	28	911	24689	CAFS_CC_T_00096464,CAFS_CC_T_00207251,CAFS_CC_T_00225330,CAFS_CC_T_00166063,
endopeptidase regulator activity	GO:0061135	0.0189144	1.91878	13	175	963	24874	CAFS_CC_T_00106037,CAFS_CC_T_00171518,CAFS_CC_T_00036880,CAFS_CC_T_00192937,CAFS_CC_T_00190772,CAFS_CC_T_00095132,CAFS_CC_T_00034585,CAFS_CC_T_00034566,CAFS_CC_T_00138228,CAFS_CC_T_00156912,CAFS_CC_T_00189962,CAFS_CC_T_00007678,CAFS_CC_T_00001401,
metencephalon development	GO:0022037	0.0192033	2.3825	8	91	911	24689	CAFS_CC_T_00054749,CAFS_CC_T_00028020,CAFS_CC_T_00180062,CAFS_CC_T_00078669,CAFS_CC_T_00079068,CAFS_CC_T_00146325,CAFS_CC_T_00071889,CAFS_CC_T_00081161,
Fanconi anaemia nuclear complex	GO:0043240	0.0192119	8.85066	2	6	904	24003	CAFS_CC_T_00143254,CAFS_CC_T_00115661,
obsolete cytoskeletal part	GO:0044430	0.0192119	8.85066	2	6	904	24003	CAFS_CC_T_00027509,CAFS_CC_T_00072071,
axis elongation	GO:0003401	0.0192625	2.56361	7	74	911	24689	CAFS_CC_T_00182672,CAFS_CC_T_00190657,CAFS_CC_T_00095495,CAFS_CC_T_00028192,CAFS_CC_T_00144218,CAFS_CC_T_00237773,CAFS_CC_T_00113976,
scavenger receptor activity	GO:0005044	0.019431	2.37514	8	87	963	24874	CAFS_CC_T_00057850,CAFS_CC_T_00179492,CAFS_CC_T_00217427,CAFS_CC_T_00089390,CAFS_CC_T_00119449,CAFS_CC_T_00214572,CAFS_CC_T_00082119,CAFS_CC_T_00166039,
acetylcholine-gated channel complex	GO:0005892	0.0201347	3.16095	5	42	904	24003	CAFS_CC_T_00108756,CAFS_CC_T_00018133,CAFS_CC_T_00063040,CAFS_CC_T_00166077,CAFS_CC_T_00136281,
galactoside binding	GO:0016936	0.0202447	8.6099	2	6	963	24874	CAFS_CC_T_00227621,CAFS_CC_T_00034986,
platelet-derived growth factor-activated receptor activity	GO:0005017	0.0202447	8.6099	2	6	963	24874	CAFS_CC_T_00019012,CAFS_CC_T_00182461,
molybdenum ion binding	GO:0030151	0.0202447	8.6099	2	6	963	24874	CAFS_CC_T_00161712,CAFS_CC_T_00163778,
heterocycle catabolic process	GO:0046700	0.0207144	1.67181	19	308	911	24689	CAFS_CC_T_00229893,CAFS_CC_T_00073491,CAFS_CC_T_00207131,CAFS_CC_T_00071609,CAFS_CC_T_00026163,CAFS_CC_T_00001714,CAFS_CC_T_00054608,CAFS_CC_T_00196592,CAFS_CC_T_00045274,CAFS_CC_T_00036795,CAFS_CC_T_00067463,CAFS_CC_T_00066556,CAFS_CC_T_00177084,CAFS_CC_T_00157416,CAFS_CC_T_00133086,CAFS_CC_T_00138370,CAFS_CC_T_00182973,CAFS_CC_T_00159374,CAFS_CC_T_00229263,
convergent extension involved in gastrulation	GO:0060027	0.0214982	2.01426	11	148	911	24689	CAFS_CC_T_00164353,CAFS_CC_T_00028020,CAFS_CC_T_00208469,CAFS_CC_T_00179910,CAFS_CC_T_00025290,CAFS_CC_T_00039861,CAFS_CC_T_00146325,CAFS_CC_T_00095495,CAFS_CC_T_00080761,CAFS_CC_T_00237773,CAFS_CC_T_00113976,
protein modification by small protein removal	GO:0070646	0.0214982	2.01426	11	148	911	24689	CAFS_CC_T_00073481,CAFS_CC_T_00034696,CAFS_CC_T_00162600,CAFS_CC_T_00160631,CAFS_CC_T_00059396,CAFS_CC_T_00233676,CAFS_CC_T_00189962,CAFS_CC_T_00154001,CAFS_CC_T_00101529,CAFS_CC_T_00181627,CAFS_CC_T_00178972,
fin morphogenesis	GO:0033334	0.0217331	2.19738	9	111	911	24689	CAFS_CC_T_00046720,CAFS_CC_T_00233839,CAFS_CC_T_00133715,CAFS_CC_T_00070725,CAFS_CC_T_00183135,CAFS_CC_T_00060815,CAFS_CC_T_00193990,CAFS_CC_T_00012277,CAFS_CC_T_00099280,
artery development	GO:0060840	0.0219843	2.49614	7	76	911	24689	CAFS_CC_T_00096114,CAFS_CC_T_00031186,CAFS_CC_T_00232651,CAFS_CC_T_00148905,CAFS_CC_T_00064302,CAFS_CC_T_00084356,CAFS_CC_T_00225766,
oxidoreductase activity, acting on the CH-CH group of donors, NAD or NADP as acceptor	GO:0016628	0.0223888	3.07496	5	42	963	24874	CAFS_CC_T_00054608,CAFS_CC_T_00012377,CAFS_CC_T_00177084,CAFS_CC_T_00163778,CAFS_CC_T_00061924,
condensed chromosome	GO:0000793	0.0224357	2.00049	11	146	904	24003	CAFS_CC_T_00240628,CAFS_CC_T_00007557,CAFS_CC_T_00173736,CAFS_CC_T_00133715,CAFS_CC_T_00246070,CAFS_CC_T_00077224,CAFS_CC_T_00059384,CAFS_CC_T_00074499,CAFS_CC_T_00139287,CAFS_CC_T_00065992,CAFS_CC_T_00200440,
photoreceptor cell development	GO:0042461	0.0228878	2.17776	9	112	911	24689	CAFS_CC_T_00055121,CAFS_CC_T_00046679,CAFS_CC_T_00012299,CAFS_CC_T_00163358,CAFS_CC_T_00114381,CAFS_CC_T_00227940,CAFS_CC_T_00177586,CAFS_CC_T_00081161,CAFS_CC_T_00080277,
eye photoreceptor cell differentiation	GO:0001754	0.0228878	2.17776	9	112	911	24689	CAFS_CC_T_00133715,CAFS_CC_T_00046679,CAFS_CC_T_00175505,CAFS_CC_T_00012299,CAFS_CC_T_00163358,CAFS_CC_T_00233649,CAFS_CC_T_00114381,CAFS_CC_T_00081161,CAFS_CC_T_00232861,
G protein-coupled adenosine receptor signaling pathway	GO:0001973	0.0231327	4.78253	3	17	911	24689	CAFS_CC_T_00073491,CAFS_CC_T_00106620,CAFS_CC_T_00196592,
G protein-coupled purinergic receptor signaling pathway	GO:0035588	0.0231327	4.78253	3	17	911	24689	CAFS_CC_T_00073491,CAFS_CC_T_00106620,CAFS_CC_T_00196592,
cellular amino acid metabolic process	GO:0006520	0.023167	1.62769	20	333	911	24689	CAFS_CC_T_00000456,CAFS_CC_T_00046679,CAFS_CC_T_00026163,CAFS_CC_T_00054608,CAFS_CC_T_00198745,CAFS_CC_T_00234800,CAFS_CC_T_00132080,CAFS_CC_T_00067441,CAFS_CC_T_00008600,CAFS_CC_T_00177084,CAFS_CC_T_00150849,CAFS_CC_T_00180236,CAFS_CC_T_00196215,CAFS_CC_T_00136142,CAFS_CC_T_00034024,CAFS_CC_T_00068623,CAFS_CC_T_00189163,CAFS_CC_T_00065988,CAFS_CC_T_00191919,CAFS_CC_T_00002312,
organelle assembly	GO:0070925	0.0232648	1.40305	38	734	911	24689	CAFS_CC_T_00096140,CAFS_CC_T_00031238,CAFS_CC_T_00240628,CAFS_CC_T_00095201,CAFS_CC_T_00021868,CAFS_CC_T_00005368,CAFS_CC_T_00031648,CAFS_CC_T_00138569,CAFS_CC_T_00057396,CAFS_CC_T_00207128,CAFS_CC_T_00055121,CAFS_CC_T_00071609,CAFS_CC_T_00025290,CAFS_CC_T_00030266,CAFS_CC_T_00123575,CAFS_CC_T_00095150,CAFS_CC_T_00246070,CAFS_CC_T_00077224,CAFS_CC_T_00192218,CAFS_CC_T_00180248,CAFS_CC_T_00051420,…
protein localization to vacuole	GO:0072665	0.0235387	3.61347	4	30	911	24689	CAFS_CC_T_00196448,CAFS_CC_T_00089981,CAFS_CC_T_00242662,CAFS_CC_T_00158059,
regulation of establishment of planar polarity	GO:0090175	0.0244291	3.01122	5	45	911	24689	CAFS_CC_T_00190657,CAFS_CC_T_00028192,CAFS_CC_T_00144218,CAFS_CC_T_00237773,CAFS_CC_T_00113976,
Wnt signaling pathway, planar cell polarity pathway	GO:0060071	0.0244291	3.01122	5	45	911	24689	CAFS_CC_T_00190657,CAFS_CC_T_00028192,CAFS_CC_T_00144218,CAFS_CC_T_00237773,CAFS_CC_T_00113976,
monosaccharide transmembrane transporter activity	GO:0015145	0.0245526	3.00345	5	43	963	24874	CAFS_CC_T_00073435,CAFS_CC_T_00224266,CAFS_CC_T_00118235,CAFS_CC_T_00100171,CAFS_CC_T_00158059,
neurotransmitter binding	GO:0042165	0.0245526	3.00345	5	43	963	24874	CAFS_CC_T_00108756,CAFS_CC_T_00018133,CAFS_CC_T_00063040,CAFS_CC_T_00166077,CAFS_CC_T_00136281,
acetylcholine binding	GO:0042166	0.0245526	3.00345	5	43	963	24874	CAFS_CC_T_00108756,CAFS_CC_T_00018133,CAFS_CC_T_00063040,CAFS_CC_T_00166077,CAFS_CC_T_00136281,
notochord development	GO:0030903	0.0245528	2.05311	10	132	911	24689	CAFS_CC_T_00096132,CAFS_CC_T_00046720,CAFS_CC_T_00076903,CAFS_CC_T_00089230,CAFS_CC_T_00138281,CAFS_CC_T_00056331,CAFS_CC_T_00203715,CAFS_CC_T_00246522,CAFS_CC_T_00055391,CAFS_CC_T_00125523,
brain morphogenesis	GO:0048854	0.0246612	2.66567	6	61	911	24689	CAFS_CC_T_00076903,CAFS_CC_T_00078669,CAFS_CC_T_00206395,CAFS_CC_T_00138281,CAFS_CC_T_00136065,CAFS_CC_T_00189962,
deoxyribonucleoside metabolic process	GO:0009120	0.0252443	7.74314	2	7	911	24689	CAFS_CC_T_00054608,CAFS_CC_T_00177084,
norepinephrine-epinephrine-mediated vasodilation involved in regulation of systemic arterial blood pressure	GO:0002025	0.0252443	7.74314	2	7	911	24689	CAFS_CC_T_00013056,CAFS_CC_T_00031347,
negative regulation of Rho protein signal transduction	GO:0035024	0.0252443	7.74314	2	7	911	24689	CAFS_CC_T_00182672,CAFS_CC_T_00216693,
cellular amide catabolic process	GO:0043605	0.0252443	7.74314	2	7	911	24689	CAFS_CC_T_00196215,CAFS_CC_T_00182973,
thymidine metabolic process	GO:0046104	0.0252443	7.74314	2	7	911	24689	CAFS_CC_T_00054608,CAFS_CC_T_00177084,
pyrimidine deoxyribonucleoside metabolic process	GO:0046125	0.0252443	7.74314	2	7	911	24689	CAFS_CC_T_00054608,CAFS_CC_T_00177084,
oligodendrocyte cell fate specification	GO:0021778	0.0252443	7.74314	2	7	911	24689	CAFS_CC_T_00028020,CAFS_CC_T_00146325,
glial cell fate specification	GO:0021780	0.0252443	7.74314	2	7	911	24689	CAFS_CC_T_00028020,CAFS_CC_T_00146325,
attachment of GPI anchor to protein	GO:0016255	0.0252443	7.74314	2	7	911	24689	CAFS_CC_T_00066188,CAFS_CC_T_00072899,
caspase complex	GO:0008303	0.0262314	7.58628	2	7	904	24003	CAFS_CC_T_00066188,CAFS_CC_T_00072899,
GPI-anchor transamidase complex	GO:0042765	0.0262314	7.58628	2	7	904	24003	CAFS_CC_T_00066188,CAFS_CC_T_00072899,
embryonic hemopoiesis	GO:0035162	0.026898	2.02246	10	134	911	24689	CAFS_CC_T_00046720,CAFS_CC_T_00040184,CAFS_CC_T_00022718,CAFS_CC_T_00241060,CAFS_CC_T_00156439,CAFS_CC_T_00049689,CAFS_CC_T_00035906,CAFS_CC_T_00005506,CAFS_CC_T_00207379,CAFS_CC_T_00203984,
purine nucleobase biosynthetic process	GO:0009113	0.0270142	4.51683	3	18	911	24689	CAFS_CC_T_00073491,CAFS_CC_T_00182677,CAFS_CC_T_00196592,
homologous chromosome segregation	GO:0045143	0.0270142	4.51683	3	18	911	24689	CAFS_CC_T_00077224,CAFS_CC_T_00059384,CAFS_CC_T_00200440,
oligosaccharide-lipid intermediate biosynthetic process	GO:0006490	0.0270142	4.51683	3	18	911	24689	CAFS_CC_T_00159023,CAFS_CC_T_00090625,CAFS_CC_T_00071889,
epinephrine binding	GO:0051379	0.0276222	7.37991	2	7	963	24874	CAFS_CC_T_00013056,CAFS_CC_T_00031347,
phosphodiesterase I activity	GO:0004528	0.0276222	7.37991	2	7	963	24874	CAFS_CC_T_00057850,CAFS_CC_T_00179492,
biotin binding	GO:0009374	0.0276222	7.37991	2	7	963	24874	CAFS_CC_T_00233008,CAFS_CC_T_00132494,
small-subunit processome	GO:0032040	0.028722	2.88609	5	46	904	24003	CAFS_CC_T_00085752,CAFS_CC_T_00210411,CAFS_CC_T_00138370,CAFS_CC_T_00022010,CAFS_CC_T_00007220,
calcium ion binding	GO:0005509	0.0287241	1.30355	54	1070	963	24874	CAFS_CC_T_00168742,CAFS_CC_T_00107396,CAFS_CC_T_00019935,CAFS_CC_T_00077812,CAFS_CC_T_00096114,CAFS_CC_T_00031648,CAFS_CC_T_00034696,CAFS_CC_T_00061861,CAFS_CC_T_00200938,CAFS_CC_T_00233839,CAFS_CC_T_00096979,CAFS_CC_T_00098270,CAFS_CC_T_00140484,CAFS_CC_T_00179910,CAFS_CC_T_00035104,CAFS_CC_T_00196898,CAFS_CC_T_00183135,CAFS_CC_T_00226859,CAFS_CC_T_00238836,CAFS_CC_T_00129256,CAFS_CC_T_00214460,…
catalytic activity, acting on RNA	GO:0140098	0.0289516	1.47755	27	472	963	24874	CAFS_CC_T_00147414,CAFS_CC_T_00022718,CAFS_CC_T_00000456,CAFS_CC_T_00024884,CAFS_CC_T_00012408,CAFS_CC_T_00164418,CAFS_CC_T_00071609,CAFS_CC_T_00079923,CAFS_CC_T_00198745,CAFS_CC_T_00045274,CAFS_CC_T_00206395,CAFS_CC_T_00067441,CAFS_CC_T_00036795,CAFS_CC_T_00188598,CAFS_CC_T_00150849,CAFS_CC_T_00188183,CAFS_CC_T_00157416,CAFS_CC_T_00050957,CAFS_CC_T_00232724,CAFS_CC_T_00140640,CAFS_CC_T_00034024,…
glomerular visceral epithelial cell development	GO:0072015	0.0291602	3.38762	4	32	911	24689	CAFS_CC_T_00146636,CAFS_CC_T_00178336,CAFS_CC_T_00114381,CAFS_CC_T_00062002,
glomerular epithelial cell development	GO:0072310	0.0291602	3.38762	4	32	911	24689	CAFS_CC_T_00146636,CAFS_CC_T_00178336,CAFS_CC_T_00114381,CAFS_CC_T_00062002,
sugar transmembrane transporter activity	GO:0051119	0.0292719	2.86997	5	45	963	24874	CAFS_CC_T_00073435,CAFS_CC_T_00224266,CAFS_CC_T_00118235,CAFS_CC_T_00100171,CAFS_CC_T_00158059,
ribonuclease activity	GO:0004540	0.0294342	2.34815	7	77	963	24874	CAFS_CC_T_00164418,CAFS_CC_T_00071609,CAFS_CC_T_00206395,CAFS_CC_T_00036795,CAFS_CC_T_00188183,CAFS_CC_T_00157416,CAFS_CC_T_00232724,
carboxylic acid metabolic process	GO:0019752	0.0303066	1.36909	39	772	911	24689	CAFS_CC_T_00233024,CAFS_CC_T_00051262,CAFS_CC_T_00233008,CAFS_CC_T_00000456,CAFS_CC_T_00217351,CAFS_CC_T_00182677,CAFS_CC_T_00213831,CAFS_CC_T_00133715,CAFS_CC_T_00046679,CAFS_CC_T_00026163,CAFS_CC_T_00018137,CAFS_CC_T_00054608,CAFS_CC_T_00198745,CAFS_CC_T_00234800,CAFS_CC_T_00100094,CAFS_CC_T_00132080,CAFS_CC_T_00079893,CAFS_CC_T_00067441,CAFS_CC_T_00161000,CAFS_CC_T_00101834,CAFS_CC_T_00008600,…
microtubule-based movement	GO:0007018	0.0305204	1.65131	17	279	911	24689	CAFS_CC_T_00031238,CAFS_CC_T_00190657,CAFS_CC_T_00005368,CAFS_CC_T_00151528,CAFS_CC_T_00049614,CAFS_CC_T_00241556,CAFS_CC_T_00207251,CAFS_CC_T_00165023,CAFS_CC_T_00192218,CAFS_CC_T_00051420,CAFS_CC_T_00199707,CAFS_CC_T_00017940,CAFS_CC_T_00227940,CAFS_CC_T_00211581,CAFS_CC_T_00139287,CAFS_CC_T_00179343,CAFS_CC_T_00205303,
nucleotide diphosphatase activity	GO:0004551	0.030577	4.30495	3	18	963	24874	CAFS_CC_T_00057850,CAFS_CC_T_00179492,CAFS_CC_T_00229263,
positive regulation of organelle organization	GO:0010638	0.0307093	1.97817	10	137	911	24689	CAFS_CC_T_00034688,CAFS_CC_T_00195162,CAFS_CC_T_00071609,CAFS_CC_T_00030266,CAFS_CC_T_00158692,CAFS_CC_T_00216693,CAFS_CC_T_00096464,CAFS_CC_T_00095495,CAFS_CC_T_00155309,CAFS_CC_T_00080256,
mitotic spindle assembly	GO:0090307	0.0313111	2.82302	5	48	911	24689	CAFS_CC_T_00138569,CAFS_CC_T_00102757,CAFS_CC_T_00069080,CAFS_CC_T_00232861,CAFS_CC_T_00192387,
dicarboxylic acid biosynthetic process	GO:0043650	0.0322436	3.28497	4	33	911	24689	CAFS_CC_T_00182677,CAFS_CC_T_00026163,CAFS_CC_T_00068623,CAFS_CC_T_00189163,
deoxyribonuclease activity	GO:0004536	0.0327106	2.15247	8	96	963	24874	CAFS_CC_T_00229893,CAFS_CC_T_00211004,CAFS_CC_T_00108443,CAFS_CC_T_00066556,CAFS_CC_T_00182410,CAFS_CC_T_00190106,CAFS_CC_T_00065992,CAFS_CC_T_00069470,
structural constituent of cytoskeleton	GO:0005200	0.0327106	2.15247	8	96	963	24874	CAFS_CC_T_00040184,CAFS_CC_T_00138569,CAFS_CC_T_00156439,CAFS_CC_T_00035906,CAFS_CC_T_00102757,CAFS_CC_T_00013576,CAFS_CC_T_00232861,CAFS_CC_T_00000166,
cytoskeleton organization	GO:0007010	0.0327117	1.29635	53	1108	911	24689	CAFS_CC_T_00213463,CAFS_CC_T_00095201,CAFS_CC_T_00183970,CAFS_CC_T_00007572,CAFS_CC_T_00020510,CAFS_CC_T_00138569,CAFS_CC_T_00057396,CAFS_CC_T_00162600,CAFS_CC_T_00133715,CAFS_CC_T_00055121,CAFS_CC_T_00156439,CAFS_CC_T_00030266,CAFS_CC_T_00123575,CAFS_CC_T_00158692,CAFS_CC_T_00216693,CAFS_CC_T_00076856,CAFS_CC_T_00035906,CAFS_CC_T_00095150,CAFS_CC_T_00246070,CAFS_CC_T_00014566,CAFS_CC_T_00227808,…
mitotic spindle elongation	GO:0000022	0.0328458	6.77525	2	8	911	24689	CAFS_CC_T_00069080,CAFS_CC_T_00192387,
spindle elongation	GO:0051231	0.0328458	6.77525	2	8	911	24689	CAFS_CC_T_00069080,CAFS_CC_T_00192387,
mitotic spindle midzone assembly	GO:0051256	0.0328458	6.77525	2	8	911	24689	CAFS_CC_T_00069080,CAFS_CC_T_00192387,
centriole-centriole cohesion	GO:0010457	0.0328458	6.77525	2	8	911	24689	CAFS_CC_T_00057396,CAFS_CC_T_00180248,
hypoxanthine metabolic process	GO:0046100	0.0328458	6.77525	2	8	911	24689	CAFS_CC_T_00073491,CAFS_CC_T_00196592,
glycerol-3-phosphate catabolic process	GO:0046168	0.0328458	6.77525	2	8	911	24689	CAFS_CC_T_00238475,CAFS_CC_T_00159650,
monocyte differentiation	GO:0030224	0.0328458	6.77525	2	8	911	24689	CAFS_CC_T_00241060,CAFS_CC_T_00049689,
slow-twitch skeletal muscle fiber contraction	GO:0031444	0.0328458	6.77525	2	8	911	24689	CAFS_CC_T_00075237,CAFS_CC_T_00199512,
otolith formation	GO:0032475	0.0328458	6.77525	2	8	911	24689	CAFS_CC_T_00032406,CAFS_CC_T_00235841,
toll-like receptor signaling pathway	GO:0002224	0.0338484	2.76541	5	49	911	24689	CAFS_CC_T_00158570,CAFS_CC_T_00124775,CAFS_CC_T_00221188,CAFS_CC_T_00014019,CAFS_CC_T_00047395,
inorganic anion exchanger activity	GO:0005452	0.0339535	3.22871	4	32	963	24874	CAFS_CC_T_00200972,CAFS_CC_T_00098558,CAFS_CC_T_00207379,CAFS_CC_T_00055293,
preribosome, small subunit precursor	GO:0030688	0.034113	6.638	2	8	904	24003	CAFS_CC_T_00164418,CAFS_CC_T_00188598,
membrane depolarization	GO:0051899	0.0346451	2.46373	6	66	911	24689	CAFS_CC_T_00061861,CAFS_CC_T_00239161,CAFS_CC_T_00140484,CAFS_CC_T_00207251,CAFS_CC_T_00159650,CAFS_CC_T_00225330,
NADPH:sulfur oxidoreductase activity	GO:0043914	0.0352913	4.07837	3	19	963	24874	CAFS_CC_T_00078941,CAFS_CC_T_00163778,CAFS_CC_T_00061924,
obsolete cell	GO:0005623	0.0353502	2.45095	6	65	904	24003	CAFS_CC_T_00096140,CAFS_CC_T_00197308,CAFS_CC_T_00222315,CAFS_CC_T_00047384,CAFS_CC_T_00082064,CAFS_CC_T_00114018,
amino acid activation	GO:0043038	0.0355162	2.25842	7	84	911	24689	CAFS_CC_T_00000456,CAFS_CC_T_00198745,CAFS_CC_T_00067441,CAFS_CC_T_00150849,CAFS_CC_T_00034024,CAFS_CC_T_00065988,CAFS_CC_T_00002312,
tRNA aminoacylation	GO:0043039	0.0355162	2.25842	7	84	911	24689	CAFS_CC_T_00000456,CAFS_CC_T_00198745,CAFS_CC_T_00067441,CAFS_CC_T_00150849,CAFS_CC_T_00034024,CAFS_CC_T_00065988,CAFS_CC_T_00002312,
homeostatic process	GO:0042592	0.0355707	1.29289	52	1090	911	24689	CAFS_CC_T_00100737,CAFS_CC_T_00057850,CAFS_CC_T_00215633,CAFS_CC_T_00040184,CAFS_CC_T_00179492,CAFS_CC_T_00073435,CAFS_CC_T_00103806,CAFS_CC_T_00125608,CAFS_CC_T_00163998,CAFS_CC_T_00197308,CAFS_CC_T_00239161,CAFS_CC_T_00034655,CAFS_CC_T_00195162,CAFS_CC_T_00200972,CAFS_CC_T_00222315,CAFS_CC_T_00246768,CAFS_CC_T_00241060,CAFS_CC_T_00117290,CAFS_CC_T_00156439,CAFS_CC_T_00035906,CAFS_CC_T_00146656,…
defense response to Gram-negative bacterium	GO:0050829	0.0357481	4.06515	3	20	911	24689	CAFS_CC_T_00218389,CAFS_CC_T_00188183,CAFS_CC_T_00074499,
oxoacid metabolic process	GO:0043436	0.035862	1.35158	39	782	911	24689	CAFS_CC_T_00233024,CAFS_CC_T_00051262,CAFS_CC_T_00233008,CAFS_CC_T_00000456,CAFS_CC_T_00217351,CAFS_CC_T_00182677,CAFS_CC_T_00213831,CAFS_CC_T_00133715,CAFS_CC_T_00046679,CAFS_CC_T_00026163,CAFS_CC_T_00018137,CAFS_CC_T_00054608,CAFS_CC_T_00198745,CAFS_CC_T_00234800,CAFS_CC_T_00100094,CAFS_CC_T_00132080,CAFS_CC_T_00079893,CAFS_CC_T_00067441,CAFS_CC_T_00161000,CAFS_CC_T_00101834,CAFS_CC_T_00008600,…
glycerol-3-phosphate dehydrogenase [NAD+] activity	GO:0004367	0.0358966	6.45742	2	8	963	24874	CAFS_CC_T_00238475,CAFS_CC_T_00159650,
glycerol-3-phosphate dehydrogenase [NAD(P)+] activity	GO:0047952	0.0358966	6.45742	2	8	963	24874	CAFS_CC_T_00238475,CAFS_CC_T_00159650,
obsolete membrane part	GO:0044425	0.0364798	2.70939	5	49	904	24003	CAFS_CC_T_00199922,CAFS_CC_T_00203866,CAFS_CC_T_00146346,CAFS_CC_T_00001577,CAFS_CC_T_00202628,
organic acid biosynthetic process	GO:0016053	0.0366666	1.6729	15	243	911	24689	CAFS_CC_T_00182677,CAFS_CC_T_00133715,CAFS_CC_T_00026163,CAFS_CC_T_00018137,CAFS_CC_T_00054608,CAFS_CC_T_00100094,CAFS_CC_T_00132080,CAFS_CC_T_00008600,CAFS_CC_T_00177084,CAFS_CC_T_00155239,CAFS_CC_T_00003721,CAFS_CC_T_00136142,CAFS_CC_T_00068623,CAFS_CC_T_00189163,CAFS_CC_T_00197247,
positive regulation of cell fate specification	GO:0042660	0.036899	27.101	1	1	911	24689	CAFS_CC_T_00064302,
response to iron(II) ion	GO:0010040	0.036899	27.101	1	1	911	24689	CAFS_CC_T_00114018,
killing by symbiont of host cells	GO:0001907	0.036899	27.101	1	1	911	24689	CAFS_CC_T_00225867,
regulation of thyroid hormone mediated signaling pathway	GO:0002155	0.036899	27.101	1	1	911	24689	CAFS_CC_T_00025378,
positive regulation of cell fate commitment	GO:0010455	0.036899	27.101	1	1	911	24689	CAFS_CC_T_00064302,
regulation of killing of cells of another organism	GO:0051709	0.036899	27.101	1	1	911	24689	CAFS_CC_T_00225867,
positive regulation of killing of cells of another organism	GO:0051712	0.036899	27.101	1	1	911	24689	CAFS_CC_T_00225867,
response to polycyclic arene	GO:1903165	0.036899	27.101	1	1	911	24689	CAFS_CC_T_00069377,
copper ion export	GO:0060003	0.036899	27.101	1	1	911	24689	CAFS_CC_T_00146656,
induction by virus of host apoptotic process	GO:0019051	0.036899	27.101	1	1	911	24689	CAFS_CC_T_00225867,
modulation by virus of host cellular process	GO:0019054	0.036899	27.101	1	1	911	24689	CAFS_CC_T_00225867,
positive regulation of apoptotic process by virus	GO:0060139	0.036899	27.101	1	1	911	24689	CAFS_CC_T_00225867,
modulation by symbiont of host programmed cell death	GO:0052040	0.036899	27.101	1	1	911	24689	CAFS_CC_T_00225867,
positive regulation by symbiont of host programmed cell death	GO:0052042	0.036899	27.101	1	1	911	24689	CAFS_CC_T_00225867,
modulation by symbiont of host apoptotic process	GO:0052150	0.036899	27.101	1	1	911	24689	CAFS_CC_T_00225867,
positive regulation by symbiont of host apoptotic process	GO:0052151	0.036899	27.101	1	1	911	24689	CAFS_CC_T_00225867,
filtration diaphragm assembly	GO:0036058	0.036899	27.101	1	1	911	24689	CAFS_CC_T_00114381,
slit diaphragm assembly	GO:0036060	0.036899	27.101	1	1	911	24689	CAFS_CC_T_00114381,
positive regulation of megakaryocyte differentiation	GO:0045654	0.036899	27.101	1	1	911	24689	CAFS_CC_T_00074499,
positive regulation of mesodermal cell differentiation	GO:1905772	0.036899	27.101	1	1	911	24689	CAFS_CC_T_00064302,
xylulose metabolic process	GO:0005997	0.036899	27.101	1	1	911	24689	CAFS_CC_T_00075159,
fumarate metabolic process	GO:0006106	0.036899	27.101	1	1	911	24689	CAFS_CC_T_00233024,
obsolete negative regulation of cAMP metabolic process	GO:0030815	0.036899	27.101	1	1	911	24689	CAFS_CC_T_00056580,
modulation by virus of host apoptotic process	GO:0039526	0.036899	27.101	1	1	911	24689	CAFS_CC_T_00225867,
killing of cells of another organism	GO:0031640	0.036899	27.101	1	1	911	24689	CAFS_CC_T_00225867,
positive regulation of mesodermal cell fate specification	GO:0048337	0.036899	27.101	1	1	911	24689	CAFS_CC_T_00064302,
axonemal outer doublet	GO:0097545	0.037662	26.552	1	1	904	24003	CAFS_CC_T_00179343,
telomerase catalytic core complex	GO:0000333	0.037662	26.552	1	1	904	24003	CAFS_CC_T_00236361,
A axonemal microtubule	GO:0097649	0.037662	26.552	1	1	904	24003	CAFS_CC_T_00179343,
transcription factor TFTC complex	GO:0033276	0.037662	26.552	1	1	904	24003	CAFS_CC_T_00160631,
radial spoke	GO:0001534	0.037662	26.552	1	1	904	24003	CAFS_CC_T_00179343,
lateral element	GO:0000800	0.037662	26.552	1	1	904	24003	CAFS_CC_T_00059384,
organic acid metabolic process	GO:0006082	0.0376722	1.34642	39	785	911	24689	CAFS_CC_T_00233024,CAFS_CC_T_00051262,CAFS_CC_T_00233008,CAFS_CC_T_00000456,CAFS_CC_T_00217351,CAFS_CC_T_00182677,CAFS_CC_T_00213831,CAFS_CC_T_00133715,CAFS_CC_T_00046679,CAFS_CC_T_00026163,CAFS_CC_T_00018137,CAFS_CC_T_00054608,CAFS_CC_T_00198745,CAFS_CC_T_00234800,CAFS_CC_T_00100094,CAFS_CC_T_00132080,CAFS_CC_T_00079893,CAFS_CC_T_00067441,CAFS_CC_T_00161000,CAFS_CC_T_00101834,CAFS_CC_T_00008600,…
2',3'-cyclic-nucleotide 3'-phosphodiesterase activity	GO:0004113	0.0387151	25.8297	1	1	963	24874	CAFS_CC_T_00207131,
fumarate hydratase activity	GO:0004333	0.0387151	25.8297	1	1	963	24874	CAFS_CC_T_00233024,
oxidized purine nucleobase lesion DNA N-glycosylase activity	GO:0008534	0.0387151	25.8297	1	1	963	24874	CAFS_CC_T_00240136,
ribonuclease P RNA binding	GO:0033204	0.0387151	25.8297	1	1	963	24874	CAFS_CC_T_00232724,
S-methyl-5-thioadenosine phosphorylase activity	GO:0017061	0.0387151	25.8297	1	1	963	24874	CAFS_CC_T_00008600,
xylulokinase activity	GO:0004856	0.0387151	25.8297	1	1	963	24874	CAFS_CC_T_00075159,
RAGE receptor binding	GO:0050786	0.0387151	25.8297	1	1	963	24874	CAFS_CC_T_00074499,
telomerase RNA reverse transcriptase activity	GO:0003721	0.0387151	25.8297	1	1	963	24874	CAFS_CC_T_00236361,
swimming behavior	GO:0036269	0.0389619	3.09726	4	35	911	24689	CAFS_CC_T_00054749,CAFS_CC_T_00144768,CAFS_CC_T_00163998,CAFS_CC_T_00044354,
regulation of embryonic development	GO:0045995	0.0389619	3.09726	4	35	911	24689	CAFS_CC_T_00028020,CAFS_CC_T_00070725,CAFS_CC_T_00193990,CAFS_CC_T_00146325,
microtubule polymerization	GO:0046785	0.0389619	3.09726	4	35	911	24689	CAFS_CC_T_00138569,CAFS_CC_T_00102757,CAFS_CC_T_00139287,CAFS_CC_T_00232861,
neuromuscular synaptic transmission	GO:0007274	0.0389619	3.09726	4	35	911	24689	CAFS_CC_T_00108756,CAFS_CC_T_00018133,CAFS_CC_T_00166077,CAFS_CC_T_00136281,
hydrolase activity	GO:0016787	0.0389977	1.14168	157	3552	963	24874	CAFS_CC_T_00189221,CAFS_CC_T_00225867,CAFS_CC_T_00096140,CAFS_CC_T_00043648,CAFS_CC_T_00233480,CAFS_CC_T_00126904,CAFS_CC_T_00179853,CAFS_CC_T_00091719,CAFS_CC_T_00023191,CAFS_CC_T_00088558,CAFS_CC_T_00068980,CAFS_CC_T_00058700,CAFS_CC_T_00046717,CAFS_CC_T_00057850,CAFS_CC_T_00066792,CAFS_CC_T_00031238,CAFS_CC_T_00023603,CAFS_CC_T_00240628,CAFS_CC_T_00179492,CAFS_CC_T_00216526,CAFS_CC_T_00214347,…
organic cyclic compound catabolic process	GO:1901361	0.0390667	1.55565	19	331	911	24689	CAFS_CC_T_00229893,CAFS_CC_T_00073491,CAFS_CC_T_00207131,CAFS_CC_T_00071609,CAFS_CC_T_00026163,CAFS_CC_T_00001714,CAFS_CC_T_00054608,CAFS_CC_T_00196592,CAFS_CC_T_00045274,CAFS_CC_T_00036795,CAFS_CC_T_00067463,CAFS_CC_T_00066556,CAFS_CC_T_00177084,CAFS_CC_T_00157416,CAFS_CC_T_00133086,CAFS_CC_T_00138370,CAFS_CC_T_00182973,CAFS_CC_T_00159374,CAFS_CC_T_00229263,
semicircular canal development	GO:0060872	0.0392959	2.65696	5	51	911	24689	CAFS_CC_T_00043648,CAFS_CC_T_00172864,CAFS_CC_T_00195162,CAFS_CC_T_00208469,CAFS_CC_T_00148561,
myosin complex	GO:0016459	0.0393898	1.97494	9	121	904	24003	CAFS_CC_T_00136710,CAFS_CC_T_00075237,CAFS_CC_T_00133212,CAFS_CC_T_00199512,CAFS_CC_T_00231669,CAFS_CC_T_00123575,CAFS_CC_T_00232651,CAFS_CC_T_00154306,CAFS_CC_T_00194163,
metal ion binding	GO:0046872	0.0399238	1.11022	226	5258	963	24874	CAFS_CC_T_00054749,CAFS_CC_T_00168742,CAFS_CC_T_00107396,CAFS_CC_T_00096132,CAFS_CC_T_00051262,CAFS_CC_T_00061078,CAFS_CC_T_00233008,CAFS_CC_T_00051281,CAFS_CC_T_00073078,CAFS_CC_T_00097055,CAFS_CC_T_00179853,CAFS_CC_T_00023191,CAFS_CC_T_00019935,CAFS_CC_T_00068980,CAFS_CC_T_00025372,CAFS_CC_T_00008800,CAFS_CC_T_00046717,CAFS_CC_T_00057850,CAFS_CC_T_00086749,CAFS_CC_T_00144392,CAFS_CC_T_00245087,…
cell-cell adhesion	GO:0098609	0.0402125	1.46823	24	443	911	24689	CAFS_CC_T_00125608,CAFS_CC_T_00233839,CAFS_CC_T_00179910,CAFS_CC_T_00070725,CAFS_CC_T_00196898,CAFS_CC_T_00016347,CAFS_CC_T_00078669,CAFS_CC_T_00214460,CAFS_CC_T_00128417,CAFS_CC_T_00014566,CAFS_CC_T_00193990,CAFS_CC_T_00169467,CAFS_CC_T_00166391,CAFS_CC_T_00095495,CAFS_CC_T_00137423,CAFS_CC_T_00196605,CAFS_CC_T_00047745,CAFS_CC_T_00114381,CAFS_CC_T_00193647,CAFS_CC_T_00145951,CAFS_CC_T_00158426,…
secondary active sulfate transmembrane transporter activity	GO:0008271	0.0403567	3.87445	3	20	963	24874	CAFS_CC_T_00215633,CAFS_CC_T_00217888,CAFS_CC_T_00091666,
snoRNA binding	GO:0030515	0.0403567	3.87445	3	20	963	24874	CAFS_CC_T_00085752,CAFS_CC_T_00210411,CAFS_CC_T_00138370,
pteridine-containing compound biosynthetic process	GO:0042559	0.0405938	3.87157	3	21	911	24689	CAFS_CC_T_00240665,CAFS_CC_T_00239669,CAFS_CC_T_00182677,
cell differentiation in hindbrain	GO:0021533	0.0405938	3.87157	3	21	911	24689	CAFS_CC_T_00028020,CAFS_CC_T_00079068,CAFS_CC_T_00146325,
mitotic metaphase plate congression	GO:0007080	0.0405938	3.87157	3	21	911	24689	CAFS_CC_T_00216693,CAFS_CC_T_00077224,CAFS_CC_T_00200440,
small nucleolar ribonucleoprotein complex assembly	GO:0000491	0.0412133	6.02244	2	9	911	24689	CAFS_CC_T_00153473,CAFS_CC_T_00106251,
positive regulation of type I interferon production	GO:0032481	0.0412133	6.02244	2	9	911	24689	CAFS_CC_T_00066483,CAFS_CC_T_00074499,
spermatogenesis	GO:0007283	0.0417561	2.18054	7	87	911	24689	CAFS_CC_T_00129625,CAFS_CC_T_00246070,CAFS_CC_T_00189852,CAFS_CC_T_00236361,CAFS_CC_T_00059384,CAFS_CC_T_00074499,CAFS_CC_T_00050884,
otolith development	GO:0048840	0.0417561	2.18054	7	87	911	24689	CAFS_CC_T_00043648,CAFS_CC_T_00208469,CAFS_CC_T_00207128,CAFS_CC_T_00032406,CAFS_CC_T_00152993,CAFS_CC_T_00148561,CAFS_CC_T_00235841,
synaptic transmission, cholinergic	GO:0007271	0.0422081	2.60586	5	52	911	24689	CAFS_CC_T_00108756,CAFS_CC_T_00018133,CAFS_CC_T_00063040,CAFS_CC_T_00166077,CAFS_CC_T_00136281,
omega peptidase activity	GO:0008242	0.0422223	1.87172	10	138	963	24874	CAFS_CC_T_00034696,CAFS_CC_T_00162600,CAFS_CC_T_00165006,CAFS_CC_T_00233676,CAFS_CC_T_00189962,CAFS_CC_T_00154001,CAFS_CC_T_00212067,CAFS_CC_T_00101529,CAFS_CC_T_00178972,CAFS_CC_T_00119727,
ciliary plasm	GO:0097014	0.0423011	2.60314	5	51	904	24003	CAFS_CC_T_00055121,CAFS_CC_T_00051420,CAFS_CC_T_00177586,CAFS_CC_T_00211581,CAFS_CC_T_00179343,
axoneme	GO:0005930	0.0423011	2.60314	5	51	904	24003	CAFS_CC_T_00055121,CAFS_CC_T_00051420,CAFS_CC_T_00177586,CAFS_CC_T_00211581,CAFS_CC_T_00179343,
microtubule cytoskeleton organization involved in mitosis	GO:1902850	0.0424657	2.04536	8	106	911	24689	CAFS_CC_T_00138569,CAFS_CC_T_00095495,CAFS_CC_T_00102757,CAFS_CC_T_00080761,CAFS_CC_T_00139287,CAFS_CC_T_00069080,CAFS_CC_T_00232861,CAFS_CC_T_00192387,
reciprocal homologous recombination	GO:0140527	0.042598	3.01122	4	36	911	24689	CAFS_CC_T_00220971,CAFS_CC_T_00182410,CAFS_CC_T_00065992,CAFS_CC_T_00069470,
positive regulation of regulated secretory pathway	GO:1903307	0.042598	3.01122	4	36	911	24689	CAFS_CC_T_00096464,CAFS_CC_T_00207251,CAFS_CC_T_00225330,CAFS_CC_T_00166063,
homologous recombination	GO:0035825	0.042598	3.01122	4	36	911	24689	CAFS_CC_T_00220971,CAFS_CC_T_00182410,CAFS_CC_T_00065992,CAFS_CC_T_00069470,
reciprocal meiotic recombination	GO:0007131	0.042598	3.01122	4	36	911	24689	CAFS_CC_T_00220971,CAFS_CC_T_00182410,CAFS_CC_T_00065992,CAFS_CC_T_00069470,
intrinsic component of synaptic vesicle membrane	GO:0098563	0.0427819	5.90044	2	9	904	24003	CAFS_CC_T_00214778,CAFS_CC_T_00135168,
integral component of synaptic vesicle membrane	GO:0030285	0.0427819	5.90044	2	9	904	24003	CAFS_CC_T_00214778,CAFS_CC_T_00135168,
Pwp2p-containing subcomplex of 90S preribosome	GO:0034388	0.0427819	5.90044	2	9	904	24003	CAFS_CC_T_00085752,CAFS_CC_T_00210411,
myeloid cell differentiation	GO:0030099	0.0431961	1.53707	19	335	911	24689	CAFS_CC_T_00225867,CAFS_CC_T_00040184,CAFS_CC_T_00180062,CAFS_CC_T_00034655,CAFS_CC_T_00195162,CAFS_CC_T_00241060,CAFS_CC_T_00156439,CAFS_CC_T_00049689,CAFS_CC_T_00035906,CAFS_CC_T_00181084,CAFS_CC_T_00236361,CAFS_CC_T_00112158,CAFS_CC_T_00005506,CAFS_CC_T_00207379,CAFS_CC_T_00082951,CAFS_CC_T_00101092,CAFS_CC_T_00074499,CAFS_CC_T_00203984,CAFS_CC_T_00184331,
ligase activity, forming carbon-oxygen bonds	GO:0016875	0.0441433	2.15247	7	84	963	24874	CAFS_CC_T_00000456,CAFS_CC_T_00198745,CAFS_CC_T_00067441,CAFS_CC_T_00150849,CAFS_CC_T_00034024,CAFS_CC_T_00065988,CAFS_CC_T_00002312,
aminoacyl-tRNA ligase activity	GO:0004812	0.0441433	2.15247	7	84	963	24874	CAFS_CC_T_00000456,CAFS_CC_T_00198745,CAFS_CC_T_00067441,CAFS_CC_T_00150849,CAFS_CC_T_00034024,CAFS_CC_T_00065988,CAFS_CC_T_00002312,
spindle assembly	GO:0051225	0.0442758	2.32294	6	70	911	24689	CAFS_CC_T_00138569,CAFS_CC_T_00102757,CAFS_CC_T_00069080,CAFS_CC_T_00232861,CAFS_CC_T_00163479,CAFS_CC_T_00192387,
nucleobase-containing compound catabolic process	GO:0034655	0.044576	1.60006	16	271	911	24689	CAFS_CC_T_00229893,CAFS_CC_T_00073491,CAFS_CC_T_00207131,CAFS_CC_T_00071609,CAFS_CC_T_00001714,CAFS_CC_T_00054608,CAFS_CC_T_00196592,CAFS_CC_T_00045274,CAFS_CC_T_00036795,CAFS_CC_T_00066556,CAFS_CC_T_00177084,CAFS_CC_T_00157416,CAFS_CC_T_00133086,CAFS_CC_T_00138370,CAFS_CC_T_00159374,CAFS_CC_T_00229263,
plasma membrane signaling receptor complex	GO:0098802	0.0446707	1.74111	12	183	904	24003	CAFS_CC_T_00007941,CAFS_CC_T_00124780,CAFS_CC_T_00108756,CAFS_CC_T_00018133,CAFS_CC_T_00063040,CAFS_CC_T_00207320,CAFS_CC_T_00083839,CAFS_CC_T_00016128,CAFS_CC_T_00126857,CAFS_CC_T_00166077,CAFS_CC_T_00126873,CAFS_CC_T_00136281,
ligase activity, forming carbon-carbon bonds	GO:0016885	0.0449876	5.73993	2	9	963	24874	CAFS_CC_T_00233008,CAFS_CC_T_00100094,
endodeoxyribonuclease activity, producing 3'-phosphomonoesters	GO:0016889	0.0449876	5.73993	2	9	963	24874	CAFS_CC_T_00190106,CAFS_CC_T_00069470,
flap endonuclease activity	GO:0048256	0.0449876	5.73993	2	9	963	24874	CAFS_CC_T_00190106,CAFS_CC_T_00069470,
oxidoreductase activity, acting on paired donors, with incorporation or reduction of molecular oxygen, reduced flavin or flavoprotein as one donor, and incorporation of one atom of oxygen	GO:0016712	0.0451807	2.95197	4	35	963	24874	CAFS_CC_T_00217351,CAFS_CC_T_00067463,CAFS_CC_T_00212433,CAFS_CC_T_00217719,
4 iron, 4 sulfur cluster binding	GO:0051539	0.0451807	2.95197	4	35	963	24874	CAFS_CC_T_00054608,CAFS_CC_T_00163605,CAFS_CC_T_00177084,CAFS_CC_T_00114018,
cation binding	GO:0043169	0.045485	1.10453	231	5402	963	24874	CAFS_CC_T_00054749,CAFS_CC_T_00168742,CAFS_CC_T_00107396,CAFS_CC_T_00096132,CAFS_CC_T_00051262,CAFS_CC_T_00061078,CAFS_CC_T_00233008,CAFS_CC_T_00051281,CAFS_CC_T_00073078,CAFS_CC_T_00097055,CAFS_CC_T_00179853,CAFS_CC_T_00023191,CAFS_CC_T_00019935,CAFS_CC_T_00068980,CAFS_CC_T_00025372,CAFS_CC_T_00008800,CAFS_CC_T_00046717,CAFS_CC_T_00057850,CAFS_CC_T_00086749,CAFS_CC_T_00144392,CAFS_CC_T_00245087,…
centriole assembly	GO:0098534	0.0457525	3.69559	3	22	911	24689	CAFS_CC_T_00057396,CAFS_CC_T_00180248,CAFS_CC_T_00079716,
cerebellar cortex formation	GO:0021697	0.0457525	3.69559	3	22	911	24689	CAFS_CC_T_00028020,CAFS_CC_T_00079068,CAFS_CC_T_00146325,
glutamate metabolic process	GO:0006536	0.0457525	3.69559	3	22	911	24689	CAFS_CC_T_00234800,CAFS_CC_T_00068623,CAFS_CC_T_00189163,
centriole replication	GO:0007099	0.0457525	3.69559	3	22	911	24689	CAFS_CC_T_00057396,CAFS_CC_T_00180248,CAFS_CC_T_00079716,
posterior lateral line neuromast hair cell differentiation	GO:0048923	0.0457525	3.69559	3	22	911	24689	CAFS_CC_T_00208469,CAFS_CC_T_00152993,CAFS_CC_T_00080277,
sulfate transmembrane transporter activity	GO:0015116	0.0457676	3.68996	3	21	963	24874	CAFS_CC_T_00215633,CAFS_CC_T_00217888,CAFS_CC_T_00091666,
G protein-coupled amine receptor activity	GO:0008227	0.0458069	1.84498	10	140	963	24874	CAFS_CC_T_00028843,CAFS_CC_T_00054203,CAFS_CC_T_00195232,CAFS_CC_T_00006937,CAFS_CC_T_00061700,CAFS_CC_T_00063040,CAFS_CC_T_00013056,CAFS_CC_T_00031347,CAFS_CC_T_00056580,CAFS_CC_T_00012106,
catalytic activity, acting on a tRNA	GO:0140101	0.0463656	1.65121	14	219	963	24874	CAFS_CC_T_00000456,CAFS_CC_T_00012408,CAFS_CC_T_00198745,CAFS_CC_T_00206395,CAFS_CC_T_00067441,CAFS_CC_T_00188598,CAFS_CC_T_00150849,CAFS_CC_T_00232724,CAFS_CC_T_00034024,CAFS_CC_T_00047745,CAFS_CC_T_00161196,CAFS_CC_T_00065988,CAFS_CC_T_00025449,CAFS_CC_T_00002312,
medial fin development	GO:0033338	0.0464186	2.92984	4	37	911	24689	CAFS_CC_T_00046720,CAFS_CC_T_00070725,CAFS_CC_T_00089230,CAFS_CC_T_00193990,
ribonucleoside metabolic process	GO:0009119	0.0464186	2.92984	4	37	911	24689	CAFS_CC_T_00073491,CAFS_CC_T_00196592,CAFS_CC_T_00008600,CAFS_CC_T_00136142,
establishment of chromosome localization	GO:0051303	0.0464186	2.92984	4	37	911	24689	CAFS_CC_T_00216693,CAFS_CC_T_00077224,CAFS_CC_T_00139287,CAFS_CC_T_00200440,
morphogenesis of a polarized epithelium	GO:0001738	0.0469195	2.29022	6	71	911	24689	CAFS_CC_T_00190657,CAFS_CC_T_00076903,CAFS_CC_T_00028192,CAFS_CC_T_00144218,CAFS_CC_T_00237773,CAFS_CC_T_00113976,
spindle	GO:0005819	0.0498449	1.75947	11	166	904	24003	CAFS_CC_T_00240628,CAFS_CC_T_00138569,CAFS_CC_T_00198692,CAFS_CC_T_00216693,CAFS_CC_T_00246070,CAFS_CC_T_00188582,CAFS_CC_T_00102757,CAFS_CC_T_00139287,CAFS_CC_T_00069080,CAFS_CC_T_00232861,CAFS_CC_T_00192387,
tRNA metabolic process	GO:0006399	0.0498926	1.66973	13	211	911	24689	CAFS_CC_T_00000456,CAFS_CC_T_00244961,CAFS_CC_T_00116365,CAFS_CC_T_00198745,CAFS_CC_T_00206395,CAFS_CC_T_00067441,CAFS_CC_T_00150849,CAFS_CC_T_00232724,CAFS_CC_T_00218428,CAFS_CC_T_00034024,CAFS_CC_T_00065988,CAFS_CC_T_00149542,CAFS_CC_T_00002312,

## Sheet: Enriched terms in WQ strain
GO_Name	GO_ID	P_value	EnrichmentScore	HitsGenesCountsInSelectedSet	HitsGenesCountsInBackground	AllGenesCountsInSelectedSet	AllGenesCountsInBackground	GenesOfSelectedSetInGOterm
arabinose metabolic process	GO:0019566	5.22823e-06	20.8875	4	4	1182	24689	CAFS_CC_T_00043648,CAFS_CC_T_00166518,CAFS_CC_T_00113033,CAFS_CC_T_00113039,
L-arabinose metabolic process	GO:0046373	5.22823e-06	20.8875	4	4	1182	24689	CAFS_CC_T_00043648,CAFS_CC_T_00166518,CAFS_CC_T_00113033,CAFS_CC_T_00113039,
alpha-L-arabinofuranosidase activity	GO:0046556	5.2662e-06	20.85	4	4	1193	24874	CAFS_CC_T_00043648,CAFS_CC_T_00166518,CAFS_CC_T_00113033,CAFS_CC_T_00113039,
sensory perception of sound	GO:0007605	4.4764e-05	3.9164	12	64	1182	24689	CAFS_CC_T_00043648,CAFS_CC_T_00166518,CAFS_CC_T_00131544,CAFS_CC_T_00013531,CAFS_CC_T_00113033,CAFS_CC_T_00113039,CAFS_CC_T_00092367,CAFS_CC_T_00148547,CAFS_CC_T_00002394,CAFS_CC_T_00027663,CAFS_CC_T_00096248,CAFS_CC_T_00158497,
piRNA binding	GO:0034584	7.30709e-05	13.9	4	6	1193	24874	CAFS_CC_T_00222359,CAFS_CC_T_00097874,CAFS_CC_T_00021106,CAFS_CC_T_00141659,
DNA alkylation	GO:0006305	9.13507e-05	4.69968	9	40	1182	24689	CAFS_CC_T_00222359,CAFS_CC_T_00073047,CAFS_CC_T_00239210,CAFS_CC_T_00191234,CAFS_CC_T_00202487,CAFS_CC_T_00064716,CAFS_CC_T_00084325,CAFS_CC_T_00021106,CAFS_CC_T_00141659,
DNA methylation	GO:0006306	9.13507e-05	4.69968	9	40	1182	24689	CAFS_CC_T_00222359,CAFS_CC_T_00073047,CAFS_CC_T_00239210,CAFS_CC_T_00191234,CAFS_CC_T_00202487,CAFS_CC_T_00064716,CAFS_CC_T_00084325,CAFS_CC_T_00021106,CAFS_CC_T_00141659,
guanyl-nucleotide exchange factor activity	GO:0005085	0.000158535	2.05756	30	304	1193	24874	CAFS_CC_T_00080616,CAFS_CC_T_00018619,CAFS_CC_T_00118013,CAFS_CC_T_00239591,CAFS_CC_T_00150634,CAFS_CC_T_00192008,CAFS_CC_T_00151146,CAFS_CC_T_00164410,CAFS_CC_T_00044000,CAFS_CC_T_00028344,CAFS_CC_T_00063907,CAFS_CC_T_00160182,CAFS_CC_T_00196506,CAFS_CC_T_00092430,CAFS_CC_T_00014499,CAFS_CC_T_00084336,CAFS_CC_T_00019798,CAFS_CC_T_00139661,CAFS_CC_T_00246508,CAFS_CC_T_00068638,CAFS_CC_T_00042070,…
otolith tethering	GO:0035889	0.000162852	11.9357	4	7	1182	24689	CAFS_CC_T_00113033,CAFS_CC_T_00113039,CAFS_CC_T_00089560,CAFS_CC_T_00096248,
DNA methylation or demethylation	GO:0044728	0.000212789	3.86805	10	54	1182	24689	CAFS_CC_T_00222359,CAFS_CC_T_00073047,CAFS_CC_T_00239210,CAFS_CC_T_00191234,CAFS_CC_T_00202487,CAFS_CC_T_00028390,CAFS_CC_T_00064716,CAFS_CC_T_00084325,CAFS_CC_T_00021106,CAFS_CC_T_00141659,
DNA modification	GO:0006304	0.000249043	3.79772	10	55	1182	24689	CAFS_CC_T_00222359,CAFS_CC_T_00073047,CAFS_CC_T_00239210,CAFS_CC_T_00191234,CAFS_CC_T_00202487,CAFS_CC_T_00028390,CAFS_CC_T_00064716,CAFS_CC_T_00084325,CAFS_CC_T_00021106,CAFS_CC_T_00141659,
cytoskeleton	GO:0005856	0.000259511	1.43199	95	1432	1112	24003	CAFS_CC_T_00247673,CAFS_CC_T_00225861,CAFS_CC_T_00067611,CAFS_CC_T_00120798,CAFS_CC_T_00076578,CAFS_CC_T_00042357,CAFS_CC_T_00040184,CAFS_CC_T_00229821,CAFS_CC_T_00041872,CAFS_CC_T_00133212,CAFS_CC_T_00212192,CAFS_CC_T_00056495,CAFS_CC_T_00219533,CAFS_CC_T_00040941,CAFS_CC_T_00205380,CAFS_CC_T_00169238,CAFS_CC_T_00158115,CAFS_CC_T_00020472,CAFS_CC_T_00245872,CAFS_CC_T_00055121,CAFS_CC_T_00104355,…
regulation of Rho protein signal transduction	GO:0035023	0.00027799	2.33318	21	188	1182	24689	CAFS_CC_T_00018619,CAFS_CC_T_00182672,CAFS_CC_T_00239591,CAFS_CC_T_00192008,CAFS_CC_T_00151146,CAFS_CC_T_00186660,CAFS_CC_T_00044000,CAFS_CC_T_00028344,CAFS_CC_T_00063907,CAFS_CC_T_00196506,CAFS_CC_T_00014499,CAFS_CC_T_00139661,CAFS_CC_T_00012615,CAFS_CC_T_00246508,CAFS_CC_T_00042070,CAFS_CC_T_00076649,CAFS_CC_T_00105949,CAFS_CC_T_00068153,CAFS_CC_T_00161280,CAFS_CC_T_00224406,CAFS_CC_T_00246658,
metalloaminopeptidase activity	GO:0070006	0.000353224	5.03275	7	29	1193	24874	CAFS_CC_T_00080609,CAFS_CC_T_00167047,CAFS_CC_T_00224183,CAFS_CC_T_00202057,CAFS_CC_T_00024314,CAFS_CC_T_00098507,CAFS_CC_T_00046867,
pi-body	GO:0071546	0.00038295	16.1891	3	4	1112	24003	CAFS_CC_T_00222359,CAFS_CC_T_00021106,CAFS_CC_T_00141659,
aminopeptidase activity	GO:0004177	0.000402538	3.90937	9	48	1193	24874	CAFS_CC_T_00080609,CAFS_CC_T_00167047,CAFS_CC_T_00224183,CAFS_CC_T_00202057,CAFS_CC_T_00024314,CAFS_CC_T_00098507,CAFS_CC_T_00046867,CAFS_CC_T_00044659,CAFS_CC_T_00082884,
sensory perception of mechanical stimulus	GO:0050954	0.000406364	3.13312	12	80	1182	24689	CAFS_CC_T_00043648,CAFS_CC_T_00166518,CAFS_CC_T_00131544,CAFS_CC_T_00013531,CAFS_CC_T_00113033,CAFS_CC_T_00113039,CAFS_CC_T_00092367,CAFS_CC_T_00148547,CAFS_CC_T_00002394,CAFS_CC_T_00027663,CAFS_CC_T_00096248,CAFS_CC_T_00158497,
centriole assembly	GO:0098534	0.000457594	5.69659	6	22	1182	24689	CAFS_CC_T_00154116,CAFS_CC_T_00040427,CAFS_CC_T_00068707,CAFS_CC_T_00202947,CAFS_CC_T_00200480,CAFS_CC_T_00092271,
centriole replication	GO:0007099	0.000457594	5.69659	6	22	1182	24689	CAFS_CC_T_00154116,CAFS_CC_T_00040427,CAFS_CC_T_00068707,CAFS_CC_T_00202947,CAFS_CC_T_00200480,CAFS_CC_T_00092271,
cell adhesion	GO:0007155	0.000460876	1.54722	62	837	1182	24689	CAFS_CC_T_00007941,CAFS_CC_T_00164350,CAFS_CC_T_00030373,CAFS_CC_T_00226371,CAFS_CC_T_00110591,CAFS_CC_T_00134547,CAFS_CC_T_00007547,CAFS_CC_T_00007546,CAFS_CC_T_00215225,CAFS_CC_T_00152876,CAFS_CC_T_00139894,CAFS_CC_T_00040941,CAFS_CC_T_00104743,CAFS_CC_T_00233839,CAFS_CC_T_00158599,CAFS_CC_T_00070725,CAFS_CC_T_00232279,CAFS_CC_T_00073791,CAFS_CC_T_00182779,CAFS_CC_T_00134206,CAFS_CC_T_00140511,…
biological adhesion	GO:0022610	0.000489928	1.54353	62	839	1182	24689	CAFS_CC_T_00007941,CAFS_CC_T_00164350,CAFS_CC_T_00030373,CAFS_CC_T_00226371,CAFS_CC_T_00110591,CAFS_CC_T_00134547,CAFS_CC_T_00007547,CAFS_CC_T_00007546,CAFS_CC_T_00215225,CAFS_CC_T_00152876,CAFS_CC_T_00139894,CAFS_CC_T_00040941,CAFS_CC_T_00104743,CAFS_CC_T_00233839,CAFS_CC_T_00158599,CAFS_CC_T_00070725,CAFS_CC_T_00232279,CAFS_CC_T_00073791,CAFS_CC_T_00182779,CAFS_CC_T_00134206,CAFS_CC_T_00140511,…
cilium organization	GO:0044782	0.000506785	1.92216	30	326	1182	24689	CAFS_CC_T_00225861,CAFS_CC_T_00164365,CAFS_CC_T_00007977,CAFS_CC_T_00155097,CAFS_CC_T_00163553,CAFS_CC_T_00055121,CAFS_CC_T_00094731,CAFS_CC_T_00246070,CAFS_CC_T_00235729,CAFS_CC_T_00023047,CAFS_CC_T_00182823,CAFS_CC_T_00040380,CAFS_CC_T_00051420,CAFS_CC_T_00064302,CAFS_CC_T_00139661,CAFS_CC_T_00181163,CAFS_CC_T_00089588,CAFS_CC_T_00220054,CAFS_CC_T_00051394,CAFS_CC_T_00018755,CAFS_CC_T_00106383,…
DNA methylation involved in gamete generation	GO:0043046	0.000542604	9.28332	4	9	1182	24689	CAFS_CC_T_00222359,CAFS_CC_T_00202487,CAFS_CC_T_00021106,CAFS_CC_T_00141659,
microtubule bundle formation	GO:0001578	0.000633647	3.68603	9	51	1182	24689	CAFS_CC_T_00120798,CAFS_CC_T_00055121,CAFS_CC_T_00246070,CAFS_CC_T_00182823,CAFS_CC_T_00051420,CAFS_CC_T_00181163,CAFS_CC_T_00220054,CAFS_CC_T_00180776,CAFS_CC_T_00080206,
motile cilium	GO:0031514	0.000670017	3.66545	9	53	1112	24003	CAFS_CC_T_00164365,CAFS_CC_T_00182236,CAFS_CC_T_00164435,CAFS_CC_T_00227323,CAFS_CC_T_00246070,CAFS_CC_T_00046122,CAFS_CC_T_00235729,CAFS_CC_T_00112655,CAFS_CC_T_00076183,
piRNA metabolic process	GO:0034587	0.000870099	8.35499	4	10	1182	24689	CAFS_CC_T_00222359,CAFS_CC_T_00097874,CAFS_CC_T_00021106,CAFS_CC_T_00141659,
epoxygenase P450 pathway	GO:0019373	0.00101776	12.5325	3	5	1182	24689	CAFS_CC_T_00217338,CAFS_CC_T_00211783,CAFS_CC_T_00217319,
regulation of Ras protein signal transduction	GO:0046578	0.0010618	1.96311	25	266	1182	24689	CAFS_CC_T_00018619,CAFS_CC_T_00182672,CAFS_CC_T_00239591,CAFS_CC_T_00192008,CAFS_CC_T_00151146,CAFS_CC_T_00164410,CAFS_CC_T_00186660,CAFS_CC_T_00044000,CAFS_CC_T_00028344,CAFS_CC_T_00063907,CAFS_CC_T_00196506,CAFS_CC_T_00014499,CAFS_CC_T_00013159,CAFS_CC_T_00139661,CAFS_CC_T_00012615,CAFS_CC_T_00246508,CAFS_CC_T_00042070,CAFS_CC_T_00076649,CAFS_CC_T_00103735,CAFS_CC_T_00105949,CAFS_CC_T_00147740,…
peptide catabolic process	GO:0043171	0.00117144	4.1775	7	35	1182	24689	CAFS_CC_T_00080609,CAFS_CC_T_00167047,CAFS_CC_T_00224183,CAFS_CC_T_00202057,CAFS_CC_T_00024314,CAFS_CC_T_00098507,CAFS_CC_T_00046867,
Rho protein signal transduction	GO:0007266	0.00131422	2.03329	22	226	1182	24689	CAFS_CC_T_00018619,CAFS_CC_T_00182672,CAFS_CC_T_00239591,CAFS_CC_T_00192008,CAFS_CC_T_00151146,CAFS_CC_T_00186660,CAFS_CC_T_00044000,CAFS_CC_T_00028344,CAFS_CC_T_00063907,CAFS_CC_T_00196506,CAFS_CC_T_00014499,CAFS_CC_T_00060742,CAFS_CC_T_00139661,CAFS_CC_T_00012615,CAFS_CC_T_00246508,CAFS_CC_T_00042070,CAFS_CC_T_00076649,CAFS_CC_T_00105949,CAFS_CC_T_00068153,CAFS_CC_T_00161280,CAFS_CC_T_00224406,…
exopeptidase activity	GO:0008238	0.00144541	2.40576	15	130	1193	24874	CAFS_CC_T_00080609,CAFS_CC_T_00167047,CAFS_CC_T_00224183,CAFS_CC_T_00039924,CAFS_CC_T_00202057,CAFS_CC_T_00240283,CAFS_CC_T_00117348,CAFS_CC_T_00066142,CAFS_CC_T_00024314,CAFS_CC_T_00098507,CAFS_CC_T_00046867,CAFS_CC_T_00044659,CAFS_CC_T_00082884,CAFS_CC_T_00240019,CAFS_CC_T_00220008,
regulation of small GTPase mediated signal transduction	GO:0051056	0.00158684	1.85514	27	304	1182	24689	CAFS_CC_T_00018619,CAFS_CC_T_00182672,CAFS_CC_T_00239591,CAFS_CC_T_00192008,CAFS_CC_T_00151146,CAFS_CC_T_00164410,CAFS_CC_T_00186660,CAFS_CC_T_00044000,CAFS_CC_T_00028344,CAFS_CC_T_00047040,CAFS_CC_T_00063907,CAFS_CC_T_00196506,CAFS_CC_T_00014499,CAFS_CC_T_00013159,CAFS_CC_T_00139661,CAFS_CC_T_00012615,CAFS_CC_T_00246508,CAFS_CC_T_00042070,CAFS_CC_T_00076649,CAFS_CC_T_00106393,CAFS_CC_T_00103735,…
plasma membrane bounded cell projection assembly	GO:0120031	0.00178042	1.72322	33	400	1182	24689	CAFS_CC_T_00225861,CAFS_CC_T_00164365,CAFS_CC_T_00182672,CAFS_CC_T_00155097,CAFS_CC_T_00163553,CAFS_CC_T_00055121,CAFS_CC_T_00094731,CAFS_CC_T_00028344,CAFS_CC_T_00246070,CAFS_CC_T_00063907,CAFS_CC_T_00023047,CAFS_CC_T_00182823,CAFS_CC_T_00226959,CAFS_CC_T_00040380,CAFS_CC_T_00051420,CAFS_CC_T_00064302,CAFS_CC_T_00139661,CAFS_CC_T_00181163,CAFS_CC_T_00012615,CAFS_CC_T_00089588,CAFS_CC_T_00046410,…
nucleoside-triphosphatase regulator activity	GO:0060589	0.00183619	1.54327	49	662	1193	24874	CAFS_CC_T_00208051,CAFS_CC_T_00080616,CAFS_CC_T_00018619,CAFS_CC_T_00118013,CAFS_CC_T_00219607,CAFS_CC_T_00239591,CAFS_CC_T_00150634,CAFS_CC_T_00192008,CAFS_CC_T_00151146,CAFS_CC_T_00223600,CAFS_CC_T_00164410,CAFS_CC_T_00211217,CAFS_CC_T_00044000,CAFS_CC_T_00028344,CAFS_CC_T_00047040,CAFS_CC_T_00063907,CAFS_CC_T_00160182,CAFS_CC_T_00196506,CAFS_CC_T_00092430,CAFS_CC_T_00085253,CAFS_CC_T_00014499,…
GTPase regulator activity	GO:0030695	0.00183619	1.54327	49	662	1193	24874	CAFS_CC_T_00208051,CAFS_CC_T_00080616,CAFS_CC_T_00018619,CAFS_CC_T_00118013,CAFS_CC_T_00219607,CAFS_CC_T_00239591,CAFS_CC_T_00150634,CAFS_CC_T_00192008,CAFS_CC_T_00151146,CAFS_CC_T_00223600,CAFS_CC_T_00164410,CAFS_CC_T_00211217,CAFS_CC_T_00044000,CAFS_CC_T_00028344,CAFS_CC_T_00047040,CAFS_CC_T_00063907,CAFS_CC_T_00160182,CAFS_CC_T_00196506,CAFS_CC_T_00092430,CAFS_CC_T_00085253,CAFS_CC_T_00014499,…
pentose metabolic process	GO:0019321	0.00189896	6.96249	4	12	1182	24689	CAFS_CC_T_00043648,CAFS_CC_T_00166518,CAFS_CC_T_00113033,CAFS_CC_T_00113039,
tricellular tight junction	GO:0061689	0.0021444	21.5854	2	2	1112	24003	CAFS_CC_T_00131544,CAFS_CC_T_00013531,
cell projection assembly	GO:0030031	0.00225941	1.69775	33	406	1182	24689	CAFS_CC_T_00225861,CAFS_CC_T_00164365,CAFS_CC_T_00182672,CAFS_CC_T_00155097,CAFS_CC_T_00163553,CAFS_CC_T_00055121,CAFS_CC_T_00094731,CAFS_CC_T_00028344,CAFS_CC_T_00246070,CAFS_CC_T_00063907,CAFS_CC_T_00023047,CAFS_CC_T_00182823,CAFS_CC_T_00226959,CAFS_CC_T_00040380,CAFS_CC_T_00051420,CAFS_CC_T_00064302,CAFS_CC_T_00139661,CAFS_CC_T_00181163,CAFS_CC_T_00012615,CAFS_CC_T_00089588,CAFS_CC_T_00046410,…
axoneme assembly	GO:0035082	0.00226863	3.74903	7	39	1182	24689	CAFS_CC_T_00055121,CAFS_CC_T_00246070,CAFS_CC_T_00182823,CAFS_CC_T_00051420,CAFS_CC_T_00181163,CAFS_CC_T_00220054,CAFS_CC_T_00180776,
organic heteropentacyclic compound metabolic process	GO:1901376	0.00229022	20.8875	2	2	1182	24689	CAFS_CC_T_00211783,CAFS_CC_T_00217319,
mycotoxin metabolic process	GO:0043385	0.00229022	20.8875	2	2	1182	24689	CAFS_CC_T_00211783,CAFS_CC_T_00217319,
regulation of SMAD protein complex assembly	GO:0010990	0.00229022	20.8875	2	2	1182	24689	CAFS_CC_T_00222359,CAFS_CC_T_00097874,
negative regulation of SMAD protein complex assembly	GO:0010991	0.00229022	20.8875	2	2	1182	24689	CAFS_CC_T_00222359,CAFS_CC_T_00097874,
nuclear-transcribed mRNA catabolic process, 3'-5' exonucleolytic nonsense-mediated decay	GO:0070478	0.00229022	20.8875	2	2	1182	24689	CAFS_CC_T_00171176,CAFS_CC_T_00001060,
aflatoxin metabolic process	GO:0046222	0.00229022	20.8875	2	2	1182	24689	CAFS_CC_T_00211783,CAFS_CC_T_00217319,
allantoicase activity	GO:0004037	0.00229849	20.85	2	2	1193	24874	CAFS_CC_T_00182973,CAFS_CC_T_00060614,
regulatory RNA binding	GO:0061980	0.00265709	6.41537	4	13	1193	24874	CAFS_CC_T_00222359,CAFS_CC_T_00097874,CAFS_CC_T_00021106,CAFS_CC_T_00141659,
microtubule cytoskeleton organization	GO:0000226	0.00296592	1.68363	32	397	1182	24689	CAFS_CC_T_00154116,CAFS_CC_T_00120798,CAFS_CC_T_00042357,CAFS_CC_T_00230833,CAFS_CC_T_00055121,CAFS_CC_T_00104355,CAFS_CC_T_00020821,CAFS_CC_T_00040427,CAFS_CC_T_00246070,CAFS_CC_T_00151614,CAFS_CC_T_00234873,CAFS_CC_T_00014566,CAFS_CC_T_00229068,CAFS_CC_T_00182823,CAFS_CC_T_00068707,CAFS_CC_T_00135676,CAFS_CC_T_00113439,CAFS_CC_T_00051420,CAFS_CC_T_00060742,CAFS_CC_T_00181163,CAFS_CC_T_00202947,…
cilium assembly	GO:0060271	0.00381824	1.76323	26	308	1182	24689	CAFS_CC_T_00225861,CAFS_CC_T_00164365,CAFS_CC_T_00155097,CAFS_CC_T_00163553,CAFS_CC_T_00055121,CAFS_CC_T_00094731,CAFS_CC_T_00246070,CAFS_CC_T_00023047,CAFS_CC_T_00182823,CAFS_CC_T_00040380,CAFS_CC_T_00051420,CAFS_CC_T_00064302,CAFS_CC_T_00139661,CAFS_CC_T_00181163,CAFS_CC_T_00089588,CAFS_CC_T_00220054,CAFS_CC_T_00051394,CAFS_CC_T_00018755,CAFS_CC_T_00106383,CAFS_CC_T_00189996,CAFS_CC_T_00110479,…
monosaccharide metabolic process	GO:0005996	0.00382142	2.24942	14	130	1182	24689	CAFS_CC_T_00043648,CAFS_CC_T_00233008,CAFS_CC_T_00166518,CAFS_CC_T_00001305,CAFS_CC_T_00043146,CAFS_CC_T_00019084,CAFS_CC_T_00230922,CAFS_CC_T_00175626,CAFS_CC_T_00113033,CAFS_CC_T_00113039,CAFS_CC_T_00053150,CAFS_CC_T_00137944,CAFS_CC_T_00021024,CAFS_CC_T_00202605,
myosin complex	GO:0016459	0.00404063	2.3191	13	121	1112	24003	CAFS_CC_T_00247673,CAFS_CC_T_00133212,CAFS_CC_T_00212192,CAFS_CC_T_00158115,CAFS_CC_T_00084912,CAFS_CC_T_00123597,CAFS_CC_T_00178264,CAFS_CC_T_00014933,CAFS_CC_T_00078545,CAFS_CC_T_00177990,CAFS_CC_T_00198079,CAFS_CC_T_00078422,CAFS_CC_T_00070841,
polysaccharide binding	GO:0030247	0.0043717	3.7909	6	33	1193	24874	CAFS_CC_T_00097862,CAFS_CC_T_00116712,CAFS_CC_T_00185760,CAFS_CC_T_00200840,CAFS_CC_T_00174138,CAFS_CC_T_00163005,
DNA replication initiation	GO:0006270	0.00459433	3.32301	7	44	1182	24689	CAFS_CC_T_00200159,CAFS_CC_T_00201020,CAFS_CC_T_00075649,CAFS_CC_T_00030285,CAFS_CC_T_00159033,CAFS_CC_T_00081398,CAFS_CC_T_00198882,
mitotic DNA replication checkpoint signaling	GO:0033314	0.00511291	7.8328	3	8	1182	24689	CAFS_CC_T_00200159,CAFS_CC_T_00081398,CAFS_CC_T_00110396,
P granule	GO:0043186	0.00517804	4.31709	5	25	1112	24003	CAFS_CC_T_00222359,CAFS_CC_T_00097874,CAFS_CC_T_00032022,CAFS_CC_T_00021106,CAFS_CC_T_00141659,
germ plasm	GO:0060293	0.00517804	4.31709	5	25	1112	24003	CAFS_CC_T_00222359,CAFS_CC_T_00097874,CAFS_CC_T_00032022,CAFS_CC_T_00021106,CAFS_CC_T_00141659,
cilium	GO:0005929	0.00587743	1.77309	23	280	1112	24003	CAFS_CC_T_00164365,CAFS_CC_T_00007977,CAFS_CC_T_00138944,CAFS_CC_T_00182236,CAFS_CC_T_00155097,CAFS_CC_T_00164435,CAFS_CC_T_00055121,CAFS_CC_T_00162681,CAFS_CC_T_00227323,CAFS_CC_T_00246070,CAFS_CC_T_00046122,CAFS_CC_T_00235729,CAFS_CC_T_00023047,CAFS_CC_T_00182823,CAFS_CC_T_00051420,CAFS_CC_T_00181163,CAFS_CC_T_00200047,CAFS_CC_T_00112655,CAFS_CC_T_00180776,CAFS_CC_T_00034318,CAFS_CC_T_00076183,…
deoxyribose phosphate catabolic process	GO:0046386	0.00599053	5.22187	4	16	1182	24689	CAFS_CC_T_00124165,CAFS_CC_T_00164663,CAFS_CC_T_00240501,CAFS_CC_T_00240500,
pole plasm	GO:0045495	0.00617037	4.15104	5	26	1112	24003	CAFS_CC_T_00222359,CAFS_CC_T_00097874,CAFS_CC_T_00032022,CAFS_CC_T_00021106,CAFS_CC_T_00141659,
sarcoplasmic reticulum	GO:0016529	0.00628348	3.14788	7	48	1112	24003	CAFS_CC_T_00125239,CAFS_CC_T_00041831,CAFS_CC_T_00089750,CAFS_CC_T_00184533,CAFS_CC_T_00044790,CAFS_CC_T_00038843,CAFS_CC_T_00160741,
metalloexopeptidase activity	GO:0008235	0.0062868	2.51204	10	83	1193	24874	CAFS_CC_T_00080609,CAFS_CC_T_00167047,CAFS_CC_T_00224183,CAFS_CC_T_00202057,CAFS_CC_T_00240283,CAFS_CC_T_00117348,CAFS_CC_T_00066142,CAFS_CC_T_00024314,CAFS_CC_T_00098507,CAFS_CC_T_00046867,
actin filament binding	GO:0051015	0.00629329	2.00963	16	166	1193	24874	CAFS_CC_T_00247673,CAFS_CC_T_00212192,CAFS_CC_T_00169238,CAFS_CC_T_00245872,CAFS_CC_T_00123597,CAFS_CC_T_00109264,CAFS_CC_T_00108894,CAFS_CC_T_00184581,CAFS_CC_T_00226959,CAFS_CC_T_00108455,CAFS_CC_T_00180277,CAFS_CC_T_00089588,CAFS_CC_T_00078422,CAFS_CC_T_00238697,CAFS_CC_T_00150161,CAFS_CC_T_00041084,
nucleoside diphosphate catabolic process	GO:0009134	0.00665173	13.925	2	3	1182	24689	CAFS_CC_T_00240501,CAFS_CC_T_00240500,
purine nucleoside diphosphate catabolic process	GO:0009137	0.00665173	13.925	2	3	1182	24689	CAFS_CC_T_00240501,CAFS_CC_T_00240500,
purine ribonucleoside diphosphate catabolic process	GO:0009181	0.00665173	13.925	2	3	1182	24689	CAFS_CC_T_00240501,CAFS_CC_T_00240500,
purine deoxyribonucleoside diphosphate metabolic process	GO:0009182	0.00665173	13.925	2	3	1182	24689	CAFS_CC_T_00240501,CAFS_CC_T_00240500,
purine deoxyribonucleoside diphosphate catabolic process	GO:0009184	0.00665173	13.925	2	3	1182	24689	CAFS_CC_T_00240501,CAFS_CC_T_00240500,
ribonucleoside diphosphate catabolic process	GO:0009191	0.00665173	13.925	2	3	1182	24689	CAFS_CC_T_00240501,CAFS_CC_T_00240500,
deoxyribonucleoside diphosphate catabolic process	GO:0009192	0.00665173	13.925	2	3	1182	24689	CAFS_CC_T_00240501,CAFS_CC_T_00240500,
dADP metabolic process	GO:0046056	0.00665173	13.925	2	3	1182	24689	CAFS_CC_T_00240501,CAFS_CC_T_00240500,
dADP catabolic process	GO:0046057	0.00665173	13.925	2	3	1182	24689	CAFS_CC_T_00240501,CAFS_CC_T_00240500,
dGDP metabolic process	GO:0046066	0.00665173	13.925	2	3	1182	24689	CAFS_CC_T_00240501,CAFS_CC_T_00240500,
dGDP catabolic process	GO:0046067	0.00665173	13.925	2	3	1182	24689	CAFS_CC_T_00240501,CAFS_CC_T_00240500,
GDP catabolic process	GO:0046712	0.00665173	13.925	2	3	1182	24689	CAFS_CC_T_00240501,CAFS_CC_T_00240500,
cysteinyl-tRNA aminoacylation	GO:0006423	0.00665173	13.925	2	3	1182	24689	CAFS_CC_T_00235662,CAFS_CC_T_00112038,
muscle alpha-actinin binding	GO:0051371	0.00667535	13.9	2	3	1193	24874	CAFS_CC_T_00247673,CAFS_CC_T_00123597,
alpha-actinin binding	GO:0051393	0.00667535	13.9	2	3	1193	24874	CAFS_CC_T_00247673,CAFS_CC_T_00123597,
cysteine-tRNA ligase activity	GO:0004817	0.00667535	13.9	2	3	1193	24874	CAFS_CC_T_00235662,CAFS_CC_T_00112038,
8-oxo-GDP phosphatase activity	GO:0044716	0.00667535	13.9	2	3	1193	24874	CAFS_CC_T_00240501,CAFS_CC_T_00240500,
8-hydroxy-dADP phosphatase activity	GO:0044717	0.00667535	13.9	2	3	1193	24874	CAFS_CC_T_00240501,CAFS_CC_T_00240500,
actinin binding	GO:0042805	0.00667535	13.9	2	3	1193	24874	CAFS_CC_T_00247673,CAFS_CC_T_00123597,
tricarboxylic acid cycle enzyme complex	GO:0045239	0.00675039	7.19514	3	9	1112	24003	CAFS_CC_T_00233024,CAFS_CC_T_00203886,CAFS_CC_T_00078467,
GARP complex	GO:0000938	0.00675039	7.19514	3	9	1112	24003	CAFS_CC_T_00126923,CAFS_CC_T_00010566,CAFS_CC_T_00154036,
Ras protein signal transduction	GO:0007265	0.00700352	1.6636	27	339	1182	24689	CAFS_CC_T_00018619,CAFS_CC_T_00182672,CAFS_CC_T_00239591,CAFS_CC_T_00192008,CAFS_CC_T_00151146,CAFS_CC_T_00164410,CAFS_CC_T_00186660,CAFS_CC_T_00044000,CAFS_CC_T_00028344,CAFS_CC_T_00063907,CAFS_CC_T_00196506,CAFS_CC_T_00014499,CAFS_CC_T_00013159,CAFS_CC_T_00122329,CAFS_CC_T_00060742,CAFS_CC_T_00139661,CAFS_CC_T_00012615,CAFS_CC_T_00246508,CAFS_CC_T_00042070,CAFS_CC_T_00076649,CAFS_CC_T_00103735,…
skeletal muscle myosin thick filament assembly	GO:0030241	0.00739806	6.96249	3	9	1182	24689	CAFS_CC_T_00247673,CAFS_CC_T_00123597,CAFS_CC_T_00219359,
germ-line stem cell population maintenance	GO:0030718	0.00739806	6.96249	3	9	1182	24689	CAFS_CC_T_00222359,CAFS_CC_T_00097874,CAFS_CC_T_00032022,
ligase activity, forming carbon-carbon bonds	GO:0016885	0.00743526	6.94999	3	9	1193	24874	CAFS_CC_T_00233008,CAFS_CC_T_00219524,CAFS_CC_T_00100094,
basement membrane organization	GO:0071711	0.0075408	4.9147	4	17	1182	24689	CAFS_CC_T_00220529,CAFS_CC_T_00060815,CAFS_CC_T_00073268,CAFS_CC_T_00099280,
meiotic cell cycle	GO:0051321	0.00848108	2.19868	12	114	1182	24689	CAFS_CC_T_00229821,CAFS_CC_T_00246070,CAFS_CC_T_00235729,CAFS_CC_T_00159178,CAFS_CC_T_00157867,CAFS_CC_T_00110396,CAFS_CC_T_00021106,CAFS_CC_T_00190106,CAFS_CC_T_00200097,CAFS_CC_T_00112655,CAFS_CC_T_00069470,CAFS_CC_T_00141659,
cell-matrix adhesion	GO:0007160	0.00865802	2.54037	9	74	1182	24689	CAFS_CC_T_00226371,CAFS_CC_T_00110591,CAFS_CC_T_00139894,CAFS_CC_T_00233839,CAFS_CC_T_00241541,CAFS_CC_T_00012615,CAFS_CC_T_00002394,CAFS_CC_T_00096248,CAFS_CC_T_00158497,
macromolecule methylation	GO:0043414	0.0096947	1.80392	19	220	1182	24689	CAFS_CC_T_00222359,CAFS_CC_T_00073047,CAFS_CC_T_00151039,CAFS_CC_T_00027174,CAFS_CC_T_00239210,CAFS_CC_T_00119805,CAFS_CC_T_00185767,CAFS_CC_T_00191234,CAFS_CC_T_00202487,CAFS_CC_T_00132079,CAFS_CC_T_00128081,CAFS_CC_T_00064716,CAFS_CC_T_00084325,CAFS_CC_T_00071018,CAFS_CC_T_00021106,CAFS_CC_T_00219359,CAFS_CC_T_00241852,CAFS_CC_T_00016964,CAFS_CC_T_00141659,
DNA replication checkpoint signaling	GO:0000076	0.0101958	6.26624	3	10	1182	24689	CAFS_CC_T_00200159,CAFS_CC_T_00081398,CAFS_CC_T_00110396,
cytoskeleton organization	GO:0007010	0.0110277	1.31961	70	1108	1182	24689	CAFS_CC_T_00247673,CAFS_CC_T_00225861,CAFS_CC_T_00067611,CAFS_CC_T_00154116,CAFS_CC_T_00120798,CAFS_CC_T_00076578,CAFS_CC_T_00042357,CAFS_CC_T_00230833,CAFS_CC_T_00101692,CAFS_CC_T_00040941,CAFS_CC_T_00169238,CAFS_CC_T_00087166,CAFS_CC_T_00245872,CAFS_CC_T_00055121,CAFS_CC_T_00164410,CAFS_CC_T_00104355,CAFS_CC_T_00178693,CAFS_CC_T_00166218,CAFS_CC_T_00020821,CAFS_CC_T_00123597,CAFS_CC_T_00040427,…
DNA-dependent DNA replication	GO:0006261	0.0110604	2.20925	11	104	1182	24689	CAFS_CC_T_00200159,CAFS_CC_T_00201020,CAFS_CC_T_00075649,CAFS_CC_T_00030285,CAFS_CC_T_00159033,CAFS_CC_T_00081398,CAFS_CC_T_00218338,CAFS_CC_T_00231096,CAFS_CC_T_00037595,CAFS_CC_T_00038827,CAFS_CC_T_00198882,
positive regulation of cell cycle process	GO:0090068	0.0113128	3.13312	6	40	1182	24689	CAFS_CC_T_00229821,CAFS_CC_T_00104743,CAFS_CC_T_00075506,CAFS_CC_T_00040427,CAFS_CC_T_00231096,CAFS_CC_T_00060742,
centrosome duplication	GO:0051298	0.0115364	2.81178	7	52	1182	24689	CAFS_CC_T_00154116,CAFS_CC_T_00040427,CAFS_CC_T_00068707,CAFS_CC_T_00060742,CAFS_CC_T_00202947,CAFS_CC_T_00200480,CAFS_CC_T_00092271,
microtubule-based process	GO:0007017	0.0116891	1.41506	46	679	1182	24689	CAFS_CC_T_00154116,CAFS_CC_T_00120798,CAFS_CC_T_00007977,CAFS_CC_T_00042357,CAFS_CC_T_00230833,CAFS_CC_T_00205380,CAFS_CC_T_00192008,CAFS_CC_T_00164435,CAFS_CC_T_00055121,CAFS_CC_T_00104355,CAFS_CC_T_00065788,CAFS_CC_T_00020821,CAFS_CC_T_00040427,CAFS_CC_T_00246070,CAFS_CC_T_00046122,CAFS_CC_T_00151614,CAFS_CC_T_00234873,CAFS_CC_T_00014566,CAFS_CC_T_00229068,CAFS_CC_T_00182823,CAFS_CC_T_00068707,…
glycosaminoglycan binding	GO:0005539	0.011986	2.18428	11	105	1193	24874	CAFS_CC_T_00178596,CAFS_CC_T_00215225,CAFS_CC_T_00240116,CAFS_CC_T_00018541,CAFS_CC_T_00131170,CAFS_CC_T_00043453,CAFS_CC_T_00168589,CAFS_CC_T_00068638,CAFS_CC_T_00123365,CAFS_CC_T_00220872,CAFS_CC_T_00000150,
deuterosome	GO:0098536	0.0120868	10.7927	2	4	1112	24003	CAFS_CC_T_00040427,CAFS_CC_T_00068707,
muscle myosin complex	GO:0005859	0.0120868	10.7927	2	4	1112	24003	CAFS_CC_T_00247673,CAFS_CC_T_00123597,
Ski complex	GO:0055087	0.0120868	10.7927	2	4	1112	24003	CAFS_CC_T_00171176,CAFS_CC_T_00001060,
allantoin catabolic process	GO:0000256	0.0128813	10.4437	2	4	1182	24689	CAFS_CC_T_00182973,CAFS_CC_T_00060614,
negative regulation of glucokinase activity	GO:0033132	0.0128813	10.4437	2	4	1182	24689	CAFS_CC_T_00175626,CAFS_CC_T_00021024,
meiotic cell cycle checkpoint signaling	GO:0033313	0.0128813	10.4437	2	4	1182	24689	CAFS_CC_T_00159178,CAFS_CC_T_00110396,
toxin metabolic process	GO:0009404	0.0128813	10.4437	2	4	1182	24689	CAFS_CC_T_00211783,CAFS_CC_T_00217319,
medium-chain fatty acid metabolic process	GO:0051791	0.0128813	10.4437	2	4	1182	24689	CAFS_CC_T_00211783,CAFS_CC_T_00217319,
negative regulation of hexokinase activity	GO:1903300	0.0128813	10.4437	2	4	1182	24689	CAFS_CC_T_00175626,CAFS_CC_T_00021024,
lipid hydroxylation	GO:0002933	0.0128813	10.4437	2	4	1182	24689	CAFS_CC_T_00211783,CAFS_CC_T_00217319,
protein retention in Golgi apparatus	GO:0045053	0.0128813	10.4437	2	4	1182	24689	CAFS_CC_T_00073329,CAFS_CC_T_00242662,
animal organ regeneration	GO:0031100	0.0128813	10.4437	2	4	1182	24689	CAFS_CC_T_00191234,CAFS_CC_T_00140791,
lauric acid metabolic process	GO:0048252	0.0128813	10.4437	2	4	1182	24689	CAFS_CC_T_00211783,CAFS_CC_T_00217319,
potassium ion export across plasma membrane	GO:0097623	0.0128813	10.4437	2	4	1182	24689	CAFS_CC_T_00077019,CAFS_CC_T_00077027,
CoA carboxylase activity	GO:0016421	0.0129262	10.425	2	4	1193	24874	CAFS_CC_T_00219524,CAFS_CC_T_00100094,
glycogen debranching enzyme activity	GO:0004133	0.0129262	10.425	2	4	1193	24874	CAFS_CC_T_00200840,CAFS_CC_T_00174138,
4-alpha-glucanotransferase activity	GO:0004134	0.0129262	10.425	2	4	1193	24874	CAFS_CC_T_00200840,CAFS_CC_T_00174138,
amylo-alpha-1,6-glucosidase activity	GO:0004135	0.0129262	10.425	2	4	1193	24874	CAFS_CC_T_00200840,CAFS_CC_T_00174138,
tRNA-specific adenosine deaminase activity	GO:0008251	0.0129262	10.425	2	4	1193	24874	CAFS_CC_T_00061015,CAFS_CC_T_00081317,
structural constituent of muscle	GO:0008307	0.0129262	10.425	2	4	1193	24874	CAFS_CC_T_00247673,CAFS_CC_T_00123597,
2,5-diamino-6-ribitylamino-4(3H)-pyrimidinone 5'-phosphate deaminase activity	GO:0043723	0.0129262	10.425	2	4	1193	24874	CAFS_CC_T_00061015,CAFS_CC_T_00081317,
tRNA-specific adenosine-37 deaminase activity	GO:0043829	0.0129262	10.425	2	4	1193	24874	CAFS_CC_T_00061015,CAFS_CC_T_00081317,
RNA polymerase I core binding	GO:0001042	0.0129262	10.425	2	4	1193	24874	CAFS_CC_T_00087041,CAFS_CC_T_00205132,
tRNA-specific adenosine-34 deaminase activity	GO:0052717	0.0129262	10.425	2	4	1193	24874	CAFS_CC_T_00061015,CAFS_CC_T_00081317,
archaeal-specific GTP cyclohydrolase activity	GO:0044682	0.0129262	10.425	2	4	1193	24874	CAFS_CC_T_00061015,CAFS_CC_T_00081317,
N-cyclopropylmelamine deaminase activity	GO:0034547	0.0129262	10.425	2	4	1193	24874	CAFS_CC_T_00061015,CAFS_CC_T_00081317,
N-cyclopropylammeline deaminase activity	GO:0034548	0.0129262	10.425	2	4	1193	24874	CAFS_CC_T_00061015,CAFS_CC_T_00081317,
N-cyclopropylammelide alkylamino hydrolase activity	GO:0034549	0.0129262	10.425	2	4	1193	24874	CAFS_CC_T_00061015,CAFS_CC_T_00081317,
acetyl-CoA carboxylase activity	GO:0003989	0.0129262	10.425	2	4	1193	24874	CAFS_CC_T_00219524,CAFS_CC_T_00100094,
arylamine N-acetyltransferase activity	GO:0004060	0.0129262	10.425	2	4	1193	24874	CAFS_CC_T_00231954,CAFS_CC_T_00231955,
otolith morphogenesis	GO:0032474	0.0131003	3.48125	5	30	1182	24689	CAFS_CC_T_00043648,CAFS_CC_T_00166518,CAFS_CC_T_00113033,CAFS_CC_T_00113039,CAFS_CC_T_00148547,
plasma membrane bounded cell projection organization	GO:0120036	0.0131437	1.28341	80	1302	1182	24689	CAFS_CC_T_00225861,CAFS_CC_T_00164365,CAFS_CC_T_00120798,CAFS_CC_T_00007977,CAFS_CC_T_00235231,CAFS_CC_T_00182672,CAFS_CC_T_00101203,CAFS_CC_T_00240116,CAFS_CC_T_00115455,CAFS_CC_T_00155097,CAFS_CC_T_00095666,CAFS_CC_T_00169238,CAFS_CC_T_00058266,CAFS_CC_T_00228086,CAFS_CC_T_00163553,CAFS_CC_T_00055121,CAFS_CC_T_00094731,CAFS_CC_T_00236963,CAFS_CC_T_00028344,CAFS_CC_T_00018541,CAFS_CC_T_00020821,…
centrosome cycle	GO:0007098	0.0132133	2.53182	8	66	1182	24689	CAFS_CC_T_00154116,CAFS_CC_T_00020821,CAFS_CC_T_00040427,CAFS_CC_T_00068707,CAFS_CC_T_00060742,CAFS_CC_T_00202947,CAFS_CC_T_00200480,CAFS_CC_T_00092271,
histone H4-K5 acetylation	GO:0043981	0.0135258	5.69659	3	11	1182	24689	CAFS_CC_T_00072866,CAFS_CC_T_00134746,CAFS_CC_T_00016656,
histone H4-K8 acetylation	GO:0043982	0.0135258	5.69659	3	11	1182	24689	CAFS_CC_T_00072866,CAFS_CC_T_00134746,CAFS_CC_T_00016656,
regulation of centriole replication	GO:0046599	0.0135258	5.69659	3	11	1182	24689	CAFS_CC_T_00040427,CAFS_CC_T_00200480,CAFS_CC_T_00092271,
intracellular cAMP-activated cation channel activity	GO:0005222	0.0135921	5.68635	3	11	1193	24874	CAFS_CC_T_00200910,CAFS_CC_T_00165898,CAFS_CC_T_00150156,
intracellular cGMP-activated cation channel activity	GO:0005223	0.0135921	5.68635	3	11	1193	24874	CAFS_CC_T_00200910,CAFS_CC_T_00165898,CAFS_CC_T_00150156,
deoxyribonucleotide catabolic process	GO:0009264	0.0136981	4.1775	4	20	1182	24689	CAFS_CC_T_00124165,CAFS_CC_T_00164663,CAFS_CC_T_00240501,CAFS_CC_T_00240500,
2'-deoxyribonucleotide metabolic process	GO:0009394	0.0136981	4.1775	4	20	1182	24689	CAFS_CC_T_00124165,CAFS_CC_T_00164663,CAFS_CC_T_00240501,CAFS_CC_T_00240500,
deoxyribose phosphate metabolic process	GO:0019692	0.0136981	4.1775	4	20	1182	24689	CAFS_CC_T_00124165,CAFS_CC_T_00164663,CAFS_CC_T_00240501,CAFS_CC_T_00240500,
sarcoplasm	GO:0016528	0.0144028	2.69818	7	56	1112	24003	CAFS_CC_T_00125239,CAFS_CC_T_00041831,CAFS_CC_T_00089750,CAFS_CC_T_00184533,CAFS_CC_T_00044790,CAFS_CC_T_00038843,CAFS_CC_T_00160741,
cell projection organization	GO:0030030	0.0148049	1.27655	80	1309	1182	24689	CAFS_CC_T_00225861,CAFS_CC_T_00164365,CAFS_CC_T_00120798,CAFS_CC_T_00007977,CAFS_CC_T_00235231,CAFS_CC_T_00182672,CAFS_CC_T_00101203,CAFS_CC_T_00240116,CAFS_CC_T_00115455,CAFS_CC_T_00155097,CAFS_CC_T_00095666,CAFS_CC_T_00169238,CAFS_CC_T_00058266,CAFS_CC_T_00228086,CAFS_CC_T_00163553,CAFS_CC_T_00055121,CAFS_CC_T_00094731,CAFS_CC_T_00236963,CAFS_CC_T_00028344,CAFS_CC_T_00018541,CAFS_CC_T_00020821,…
actin binding	GO:0003779	0.0151172	1.4458	38	548	1193	24874	CAFS_CC_T_00247673,CAFS_CC_T_00040184,CAFS_CC_T_00100799,CAFS_CC_T_00212192,CAFS_CC_T_00169238,CAFS_CC_T_00158115,CAFS_CC_T_00087166,CAFS_CC_T_00245872,CAFS_CC_T_00104355,CAFS_CC_T_00166218,CAFS_CC_T_00050208,CAFS_CC_T_00123597,CAFS_CC_T_00178264,CAFS_CC_T_00179578,CAFS_CC_T_00109264,CAFS_CC_T_00043966,CAFS_CC_T_00083977,CAFS_CC_T_00108894,CAFS_CC_T_00184581,CAFS_CC_T_00079807,CAFS_CC_T_00226959,…
intracellular ligand-gated ion channel activity	GO:0005217	0.0160547	2.9093	6	43	1193	24874	CAFS_CC_T_00200910,CAFS_CC_T_00041831,CAFS_CC_T_00165898,CAFS_CC_T_00044790,CAFS_CC_T_00164998,CAFS_CC_T_00150156,
quinone metabolic process	GO:1901661	0.016293	3.97857	4	21	1182	24689	CAFS_CC_T_00086359,CAFS_CC_T_00081026,CAFS_CC_T_00202489,CAFS_CC_T_00104692,
quinone biosynthetic process	GO:1901663	0.016293	3.97857	4	21	1182	24689	CAFS_CC_T_00086359,CAFS_CC_T_00081026,CAFS_CC_T_00202489,CAFS_CC_T_00104692,
regulation of actin cytoskeleton reorganization	GO:2000249	0.016293	3.97857	4	21	1182	24689	CAFS_CC_T_00067611,CAFS_CC_T_00040941,CAFS_CC_T_00160591,CAFS_CC_T_00155309,
ubiquinone metabolic process	GO:0006743	0.016293	3.97857	4	21	1182	24689	CAFS_CC_T_00086359,CAFS_CC_T_00081026,CAFS_CC_T_00202489,CAFS_CC_T_00104692,
ubiquinone biosynthetic process	GO:0006744	0.016293	3.97857	4	21	1182	24689	CAFS_CC_T_00086359,CAFS_CC_T_00081026,CAFS_CC_T_00202489,CAFS_CC_T_00104692,
small GTPase binding	GO:0031267	0.0165882	1.68145	20	248	1193	24874	CAFS_CC_T_00015197,CAFS_CC_T_00240590,CAFS_CC_T_00211217,CAFS_CC_T_00142617,CAFS_CC_T_00166218,CAFS_CC_T_00100430,CAFS_CC_T_00043966,CAFS_CC_T_00083977,CAFS_CC_T_00122329,CAFS_CC_T_00060742,CAFS_CC_T_00093211,CAFS_CC_T_00246508,CAFS_CC_T_00024234,CAFS_CC_T_00129878,CAFS_CC_T_00118764,CAFS_CC_T_00166884,CAFS_CC_T_00007242,CAFS_CC_T_00162515,CAFS_CC_T_00060683,CAFS_CC_T_00076169,
A band	GO:0031672	0.017191	3.92462	4	22	1112	24003	CAFS_CC_T_00247673,CAFS_CC_T_00041831,CAFS_CC_T_00123597,CAFS_CC_T_00117117,
cyclic nucleotide-gated ion channel activity	GO:0043855	0.0174855	5.21249	3	12	1193	24874	CAFS_CC_T_00200910,CAFS_CC_T_00165898,CAFS_CC_T_00150156,
histone acetyltransferase activity (H4-K5 specific)	GO:0043995	0.0174855	5.21249	3	12	1193	24874	CAFS_CC_T_00072866,CAFS_CC_T_00134746,CAFS_CC_T_00016656,
histone acetyltransferase activity (H4-K8 specific)	GO:0043996	0.0174855	5.21249	3	12	1193	24874	CAFS_CC_T_00072866,CAFS_CC_T_00134746,CAFS_CC_T_00016656,
intracellular cyclic nucleotide activated cation channel activity	GO:0005221	0.0174855	5.21249	3	12	1193	24874	CAFS_CC_T_00200910,CAFS_CC_T_00165898,CAFS_CC_T_00150156,
histone acetyltransferase activity (H4-K16 specific)	GO:0046972	0.0174855	5.21249	3	12	1193	24874	CAFS_CC_T_00072866,CAFS_CC_T_00134746,CAFS_CC_T_00016656,
biotin carboxylase activity	GO:0004075	0.0174855	5.21249	3	12	1193	24874	CAFS_CC_T_00233008,CAFS_CC_T_00219524,CAFS_CC_T_00100094,
cytoskeletal protein binding	GO:0008092	0.0178199	1.31238	62	985	1193	24874	CAFS_CC_T_00247673,CAFS_CC_T_00120798,CAFS_CC_T_00042357,CAFS_CC_T_00040184,CAFS_CC_T_00138947,CAFS_CC_T_00100799,CAFS_CC_T_00212192,CAFS_CC_T_00205380,CAFS_CC_T_00169238,CAFS_CC_T_00158115,CAFS_CC_T_00087166,CAFS_CC_T_00245872,CAFS_CC_T_00104355,CAFS_CC_T_00166218,CAFS_CC_T_00065788,CAFS_CC_T_00020821,CAFS_CC_T_00050208,CAFS_CC_T_00123597,CAFS_CC_T_00178264,CAFS_CC_T_00179578,CAFS_CC_T_00109264,…
cation binding	GO:0043169	0.0180224	1.11545	289	5402	1193	24874	CAFS_CC_T_00201438,CAFS_CC_T_00068916,CAFS_CC_T_00007530,CAFS_CC_T_00110551,CAFS_CC_T_00008865,CAFS_CC_T_00084153,CAFS_CC_T_00019964,CAFS_CC_T_00027588,CAFS_CC_T_00233008,CAFS_CC_T_00178542,CAFS_CC_T_00080609,CAFS_CC_T_00064121,CAFS_CC_T_00023191,CAFS_CC_T_00235231,CAFS_CC_T_00085417,CAFS_CC_T_00094370,CAFS_CC_T_00192809,CAFS_CC_T_00167047,CAFS_CC_T_00097897,CAFS_CC_T_00016078,CAFS_CC_T_00230833,…
homophilic cell adhesion via plasma membrane adhesion molecules	GO:0007156	0.0180383	1.78716	16	187	1182	24689	CAFS_CC_T_00110591,CAFS_CC_T_00134547,CAFS_CC_T_00233839,CAFS_CC_T_00158599,CAFS_CC_T_00073791,CAFS_CC_T_00014566,CAFS_CC_T_00169467,CAFS_CC_T_00023309,CAFS_CC_T_00159691,CAFS_CC_T_00149878,CAFS_CC_T_00093229,CAFS_CC_T_00008916,CAFS_CC_T_00027663,CAFS_CC_T_00174529,CAFS_CC_T_00129971,CAFS_CC_T_00134046,
RNA helicase activity	GO:0003724	0.0191177	2.12755	10	98	1193	24874	CAFS_CC_T_00022718,CAFS_CC_T_00035141,CAFS_CC_T_00171176,CAFS_CC_T_00097758,CAFS_CC_T_00045274,CAFS_CC_T_00218338,CAFS_CC_T_00240251,CAFS_CC_T_00052787,CAFS_CC_T_00180764,CAFS_CC_T_00001060,
ATP-dependent activity, acting on RNA	GO:0008186	0.0191177	2.12755	10	98	1193	24874	CAFS_CC_T_00022718,CAFS_CC_T_00035141,CAFS_CC_T_00171176,CAFS_CC_T_00097758,CAFS_CC_T_00045274,CAFS_CC_T_00218338,CAFS_CC_T_00240251,CAFS_CC_T_00052787,CAFS_CC_T_00180764,CAFS_CC_T_00001060,
nucleoside-diphosphatase activity	GO:0017110	0.0192908	3.7909	4	22	1193	24874	CAFS_CC_T_00018755,CAFS_CC_T_00240501,CAFS_CC_T_00240500,CAFS_CC_T_00035662,
microtubule organizing center attachment site	GO:0034992	0.0195284	8.63417	2	5	1112	24003	CAFS_CC_T_00180277,CAFS_CC_T_00041084,
meiotic nuclear membrane microtubule tethering complex	GO:0034993	0.0195284	8.63417	2	5	1112	24003	CAFS_CC_T_00180277,CAFS_CC_T_00041084,
spanning component of plasma membrane	GO:0044214	0.0195284	8.63417	2	5	1112	24003	CAFS_CC_T_00077019,CAFS_CC_T_00077027,
nuclear membrane protein complex	GO:0106083	0.0195284	8.63417	2	5	1112	24003	CAFS_CC_T_00180277,CAFS_CC_T_00041084,
nuclear membrane microtubule tethering complex	GO:0106094	0.0195284	8.63417	2	5	1112	24003	CAFS_CC_T_00180277,CAFS_CC_T_00041084,
spanning component of membrane	GO:0089717	0.0195284	8.63417	2	5	1112	24003	CAFS_CC_T_00077019,CAFS_CC_T_00077027,
IPAF inflammasome complex	GO:0072557	0.0195284	8.63417	2	5	1112	24003	CAFS_CC_T_00234773,CAFS_CC_T_00037991,
NLRP3 inflammasome complex	GO:0072559	0.0195284	8.63417	2	5	1112	24003	CAFS_CC_T_00234773,CAFS_CC_T_00037991,
AIM2 inflammasome complex	GO:0097169	0.0195284	8.63417	2	5	1112	24003	CAFS_CC_T_00234773,CAFS_CC_T_00037991,
gall bladder development	GO:0061010	0.0207903	8.35499	2	5	1182	24689	CAFS_CC_T_00190106,CAFS_CC_T_00069470,
regulation of DNA-dependent DNA replication initiation	GO:0030174	0.0207903	8.35499	2	5	1182	24689	CAFS_CC_T_00159033,CAFS_CC_T_00081398,
leading strand elongation	GO:0006272	0.0207903	8.35499	2	5	1182	24689	CAFS_CC_T_00075649,CAFS_CC_T_00198882,
C4-dicarboxylate transport	GO:0015740	0.0207903	8.35499	2	5	1182	24689	CAFS_CC_T_00115603,CAFS_CC_T_00171799,
diacylglycerol binding	GO:0019992	0.0208616	8.33998	2	5	1193	24874	CAFS_CC_T_00178542,CAFS_CC_T_00045720,
8-oxo-dGDP phosphatase activity	GO:0044715	0.0208616	8.33998	2	5	1193	24874	CAFS_CC_T_00240501,CAFS_CC_T_00240500,
regulation of DNA methylation	GO:0044030	0.02183	4.82019	3	13	1182	24689	CAFS_CC_T_00191234,CAFS_CC_T_00064716,CAFS_CC_T_00084325,
striated muscle myosin thick filament assembly	GO:0071688	0.02183	4.82019	3	13	1182	24689	CAFS_CC_T_00247673,CAFS_CC_T_00123597,CAFS_CC_T_00219359,
polarized epithelial cell differentiation	GO:0030859	0.02183	4.82019	3	13	1182	24689	CAFS_CC_T_00212192,CAFS_CC_T_00201259,CAFS_CC_T_00243566,
myosin filament organization	GO:0031033	0.02183	4.82019	3	13	1182	24689	CAFS_CC_T_00247673,CAFS_CC_T_00123597,CAFS_CC_T_00219359,
myosin filament assembly	GO:0031034	0.02183	4.82019	3	13	1182	24689	CAFS_CC_T_00247673,CAFS_CC_T_00123597,CAFS_CC_T_00219359,
dolichol-linked oligosaccharide biosynthetic process	GO:0006488	0.02183	4.82019	3	13	1182	24689	CAFS_CC_T_00090625,CAFS_CC_T_00071889,CAFS_CC_T_00217287,
arachidonic acid epoxygenase activity	GO:0008392	0.021934	4.81153	3	13	1193	24874	CAFS_CC_T_00217338,CAFS_CC_T_00211783,CAFS_CC_T_00217319,
enzyme regulator activity	GO:0030234	0.0222915	1.25449	79	1313	1193	24874	CAFS_CC_T_00208051,CAFS_CC_T_00080616,CAFS_CC_T_00018619,CAFS_CC_T_00118013,CAFS_CC_T_00167042,CAFS_CC_T_00030353,CAFS_CC_T_00041872,CAFS_CC_T_00219607,CAFS_CC_T_00239591,CAFS_CC_T_00072985,CAFS_CC_T_00150634,CAFS_CC_T_00044079,CAFS_CC_T_00095666,CAFS_CC_T_00058266,CAFS_CC_T_00141318,CAFS_CC_T_00192008,CAFS_CC_T_00151146,CAFS_CC_T_00223600,CAFS_CC_T_00054275,CAFS_CC_T_00164410,CAFS_CC_T_00211217,…
otolith development	GO:0048840	0.0232765	2.16077	9	87	1182	24689	CAFS_CC_T_00043648,CAFS_CC_T_00166518,CAFS_CC_T_00152993,CAFS_CC_T_00113033,CAFS_CC_T_00113039,CAFS_CC_T_00092367,CAFS_CC_T_00148547,CAFS_CC_T_00089560,CAFS_CC_T_00096248,
GTPase binding	GO:0051020	0.0242203	1.61628	20	258	1193	24874	CAFS_CC_T_00015197,CAFS_CC_T_00240590,CAFS_CC_T_00211217,CAFS_CC_T_00142617,CAFS_CC_T_00166218,CAFS_CC_T_00100430,CAFS_CC_T_00043966,CAFS_CC_T_00083977,CAFS_CC_T_00122329,CAFS_CC_T_00060742,CAFS_CC_T_00093211,CAFS_CC_T_00246508,CAFS_CC_T_00024234,CAFS_CC_T_00129878,CAFS_CC_T_00118764,CAFS_CC_T_00166884,CAFS_CC_T_00007242,CAFS_CC_T_00162515,CAFS_CC_T_00060683,CAFS_CC_T_00076169,
regulation of embryonic development	GO:0045995	0.0245417	2.98393	5	35	1182	24689	CAFS_CC_T_00028020,CAFS_CC_T_00070725,CAFS_CC_T_00232279,CAFS_CC_T_00059470,CAFS_CC_T_00201259,
metal ion binding	GO:0046872	0.0245497	1.11031	280	5258	1193	24874	CAFS_CC_T_00201438,CAFS_CC_T_00068916,CAFS_CC_T_00007530,CAFS_CC_T_00008865,CAFS_CC_T_00084153,CAFS_CC_T_00019964,CAFS_CC_T_00027588,CAFS_CC_T_00233008,CAFS_CC_T_00178542,CAFS_CC_T_00080609,CAFS_CC_T_00064121,CAFS_CC_T_00023191,CAFS_CC_T_00235231,CAFS_CC_T_00085417,CAFS_CC_T_00094370,CAFS_CC_T_00192809,CAFS_CC_T_00167047,CAFS_CC_T_00097897,CAFS_CC_T_00016078,CAFS_CC_T_00230833,CAFS_CC_T_00028032,…
Z disc	GO:0030018	0.0259199	2.24264	8	77	1112	24003	CAFS_CC_T_00247673,CAFS_CC_T_00238714,CAFS_CC_T_00041831,CAFS_CC_T_00123597,CAFS_CC_T_00044790,CAFS_CC_T_00110479,CAFS_CC_T_00238697,CAFS_CC_T_00117117,
MCM complex	GO:0042555	0.0266529	3.45367	4	25	1112	24003	CAFS_CC_T_00201020,CAFS_CC_T_00030285,CAFS_CC_T_00037595,CAFS_CC_T_00038827,
regulation of DNA-dependent DNA replication	GO:0090329	0.0268136	4.47589	3	14	1182	24689	CAFS_CC_T_00159033,CAFS_CC_T_00081398,CAFS_CC_T_00231096,
3-HSA hydroxylase activity	GO:0034819	0.0269397	4.46785	3	14	1193	24874	CAFS_CC_T_00166218,CAFS_CC_T_00043966,CAFS_CC_T_00104692,
4-chlorobenzaldehyde oxidase activity	GO:0018471	0.0269397	4.46785	3	14	1193	24874	CAFS_CC_T_00166218,CAFS_CC_T_00043966,CAFS_CC_T_00104692,
4-hydroxypyridine-3-hydroxylase activity	GO:0034894	0.0269397	4.46785	3	14	1193	24874	CAFS_CC_T_00166218,CAFS_CC_T_00043966,CAFS_CC_T_00104692,
thalianol hydroxylase activity	GO:0080014	0.0269397	4.46785	3	14	1193	24874	CAFS_CC_T_00166218,CAFS_CC_T_00043966,CAFS_CC_T_00104692,
3,5-xylenol methylhydroxylase activity	GO:0018630	0.0269397	4.46785	3	14	1193	24874	CAFS_CC_T_00166218,CAFS_CC_T_00043966,CAFS_CC_T_00104692,
phenylacetate hydroxylase activity	GO:0018631	0.0269397	4.46785	3	14	1193	24874	CAFS_CC_T_00166218,CAFS_CC_T_00043966,CAFS_CC_T_00104692,
4-nitrophenol 4-monooxygenase activity	GO:0018632	0.0269397	4.46785	3	14	1193	24874	CAFS_CC_T_00166218,CAFS_CC_T_00043966,CAFS_CC_T_00104692,
dimethyl sulfide monooxygenase activity	GO:0018633	0.0269397	4.46785	3	14	1193	24874	CAFS_CC_T_00166218,CAFS_CC_T_00043966,CAFS_CC_T_00104692,
alpha-pinene monooxygenase [NADH] activity	GO:0018634	0.0269397	4.46785	3	14	1193	24874	CAFS_CC_T_00166218,CAFS_CC_T_00043966,CAFS_CC_T_00104692,
phenanthrene 9,10-monooxygenase activity	GO:0018636	0.0269397	4.46785	3	14	1193	24874	CAFS_CC_T_00166218,CAFS_CC_T_00043966,CAFS_CC_T_00104692,
1-hydroxy-2-naphthoate hydroxylase activity	GO:0018637	0.0269397	4.46785	3	14	1193	24874	CAFS_CC_T_00166218,CAFS_CC_T_00043966,CAFS_CC_T_00104692,
toluene 4-monooxygenase activity	GO:0018638	0.0269397	4.46785	3	14	1193	24874	CAFS_CC_T_00166218,CAFS_CC_T_00043966,CAFS_CC_T_00104692,
xylene monooxygenase activity	GO:0018639	0.0269397	4.46785	3	14	1193	24874	CAFS_CC_T_00166218,CAFS_CC_T_00043966,CAFS_CC_T_00104692,
dibenzothiophene monooxygenase activity	GO:0018640	0.0269397	4.46785	3	14	1193	24874	CAFS_CC_T_00166218,CAFS_CC_T_00043966,CAFS_CC_T_00104692,
6-hydroxy-3-methyl-2-oxo-1,2-dihydroquinoline 6-monooxygenase activity	GO:0018641	0.0269397	4.46785	3	14	1193	24874	CAFS_CC_T_00166218,CAFS_CC_T_00043966,CAFS_CC_T_00104692,
chlorophenol 4-monooxygenase activity	GO:0018642	0.0269397	4.46785	3	14	1193	24874	CAFS_CC_T_00166218,CAFS_CC_T_00043966,CAFS_CC_T_00104692,
carbon disulfide oxygenase activity	GO:0018643	0.0269397	4.46785	3	14	1193	24874	CAFS_CC_T_00166218,CAFS_CC_T_00043966,CAFS_CC_T_00104692,
toluene 2-monooxygenase activity	GO:0018644	0.0269397	4.46785	3	14	1193	24874	CAFS_CC_T_00166218,CAFS_CC_T_00043966,CAFS_CC_T_00104692,
1-hydroxy-2-oxolimonene 1,2-monooxygenase activity	GO:0018646	0.0269397	4.46785	3	14	1193	24874	CAFS_CC_T_00166218,CAFS_CC_T_00043966,CAFS_CC_T_00104692,
phenanthrene 1,2-monooxygenase activity	GO:0018647	0.0269397	4.46785	3	14	1193	24874	CAFS_CC_T_00166218,CAFS_CC_T_00043966,CAFS_CC_T_00104692,
tetrahydrofuran hydroxylase activity	GO:0018649	0.0269397	4.46785	3	14	1193	24874	CAFS_CC_T_00166218,CAFS_CC_T_00043966,CAFS_CC_T_00104692,
styrene monooxygenase activity	GO:0018650	0.0269397	4.46785	3	14	1193	24874	CAFS_CC_T_00166218,CAFS_CC_T_00043966,CAFS_CC_T_00104692,
toluene-4-sulfonate monooxygenase activity	GO:0018651	0.0269397	4.46785	3	14	1193	24874	CAFS_CC_T_00166218,CAFS_CC_T_00043966,CAFS_CC_T_00104692,
toluene-sulfonate methyl-monooxygenase activity	GO:0018652	0.0269397	4.46785	3	14	1193	24874	CAFS_CC_T_00166218,CAFS_CC_T_00043966,CAFS_CC_T_00104692,
3-methyl-2-oxo-1,2-dihydroquinoline 6-monooxygenase activity	GO:0018653	0.0269397	4.46785	3	14	1193	24874	CAFS_CC_T_00166218,CAFS_CC_T_00043966,CAFS_CC_T_00104692,
2-hydroxy-phenylacetate hydroxylase activity	GO:0018654	0.0269397	4.46785	3	14	1193	24874	CAFS_CC_T_00166218,CAFS_CC_T_00043966,CAFS_CC_T_00104692,
2-oxo-delta3-4,5,5-trimethylcyclopentenylacetyl-CoA 1,2-monooxygenase activity	GO:0018655	0.0269397	4.46785	3	14	1193	24874	CAFS_CC_T_00166218,CAFS_CC_T_00043966,CAFS_CC_T_00104692,
phenanthrene 3,4-monooxygenase activity	GO:0018656	0.0269397	4.46785	3	14	1193	24874	CAFS_CC_T_00166218,CAFS_CC_T_00043966,CAFS_CC_T_00104692,
toluene 3-monooxygenase activity	GO:0018657	0.0269397	4.46785	3	14	1193	24874	CAFS_CC_T_00166218,CAFS_CC_T_00043966,CAFS_CC_T_00104692,
4-hydroxyphenylacetate,NADH:oxygen oxidoreductase (3-hydroxylating) activity	GO:0018660	0.0269397	4.46785	3	14	1193	24874	CAFS_CC_T_00166218,CAFS_CC_T_00043966,CAFS_CC_T_00104692,
3-(3-hydroxyphenyl)propionate hydroxylase activity	GO:0008688	0.0269397	4.46785	3	14	1193	24874	CAFS_CC_T_00166218,CAFS_CC_T_00043966,CAFS_CC_T_00104692,
limonene monooxygenase activity	GO:0019113	0.0269397	4.46785	3	14	1193	24874	CAFS_CC_T_00166218,CAFS_CC_T_00043966,CAFS_CC_T_00104692,
2-octaprenyl-3-methyl-6-methoxy-1,4-benzoquinol hydroxylase activity	GO:0043719	0.0269397	4.46785	3	14	1193	24874	CAFS_CC_T_00166218,CAFS_CC_T_00043966,CAFS_CC_T_00104692,
6-hydroxynicotinate 3-monooxygenase activity	GO:0043731	0.0269397	4.46785	3	14	1193	24874	CAFS_CC_T_00166218,CAFS_CC_T_00043966,CAFS_CC_T_00104692,
tocotrienol omega-hydroxylase activity	GO:0052872	0.0269397	4.46785	3	14	1193	24874	CAFS_CC_T_00166218,CAFS_CC_T_00043966,CAFS_CC_T_00104692,
2-methylnaphthalene hydroxylase activity	GO:0034526	0.0269397	4.46785	3	14	1193	24874	CAFS_CC_T_00166218,CAFS_CC_T_00043966,CAFS_CC_T_00104692,
1-methylnaphthalene hydroxylase activity	GO:0034534	0.0269397	4.46785	3	14	1193	24874	CAFS_CC_T_00166218,CAFS_CC_T_00043966,CAFS_CC_T_00104692,
bisphenol A hydroxylase A activity	GO:0034560	0.0269397	4.46785	3	14	1193	24874	CAFS_CC_T_00166218,CAFS_CC_T_00043966,CAFS_CC_T_00104692,
salicylate 5-hydroxylase activity	GO:0034785	0.0269397	4.46785	3	14	1193	24874	CAFS_CC_T_00166218,CAFS_CC_T_00043966,CAFS_CC_T_00104692,
isobutylamine N-hydroxylase activity	GO:0034791	0.0269397	4.46785	3	14	1193	24874	CAFS_CC_T_00166218,CAFS_CC_T_00043966,CAFS_CC_T_00104692,
branched-chain dodecylbenzene sulfonate monooxygenase activity	GO:0034802	0.0269397	4.46785	3	14	1193	24874	CAFS_CC_T_00166218,CAFS_CC_T_00043966,CAFS_CC_T_00104692,
myosin II complex	GO:0016460	0.0284002	7.19514	2	6	1112	24003	CAFS_CC_T_00247673,CAFS_CC_T_00123597,
Fanconi anaemia nuclear complex	GO:0043240	0.0284002	7.19514	2	6	1112	24003	CAFS_CC_T_00115661,CAFS_CC_T_00239577,
obsolete cytoskeletal part	GO:0044430	0.0284002	7.19514	2	6	1112	24003	CAFS_CC_T_00072071,CAFS_CC_T_00037841,
alpha DNA polymerase:primase complex	GO:0005658	0.0284002	7.19514	2	6	1112	24003	CAFS_CC_T_00075649,CAFS_CC_T_00198882,
regulation of centrosome duplication	GO:0010824	0.0296236	3.342	4	25	1182	24689	CAFS_CC_T_00040427,CAFS_CC_T_00060742,CAFS_CC_T_00200480,CAFS_CC_T_00092271,
regulation of centrosome cycle	GO:0046605	0.0296236	3.342	4	25	1182	24689	CAFS_CC_T_00040427,CAFS_CC_T_00060742,CAFS_CC_T_00200480,CAFS_CC_T_00092271,
replisome	GO:0030894	0.0297227	4.31709	3	15	1112	24003	CAFS_CC_T_00075649,CAFS_CC_T_00038827,CAFS_CC_T_00198882,
nuclear replisome	GO:0043601	0.0297227	4.31709	3	15	1112	24003	CAFS_CC_T_00075649,CAFS_CC_T_00038827,CAFS_CC_T_00198882,
regulation of glucokinase activity	GO:0033131	0.0302039	6.96249	2	6	1182	24689	CAFS_CC_T_00175626,CAFS_CC_T_00021024,
positive regulation of actin nucleation	GO:0051127	0.0302039	6.96249	2	6	1182	24689	CAFS_CC_T_00245872,CAFS_CC_T_00122329,
regulation of hexokinase activity	GO:1903299	0.0302039	6.96249	2	6	1182	24689	CAFS_CC_T_00175626,CAFS_CC_T_00021024,
hepatic duct development	GO:0061011	0.0302039	6.96249	2	6	1182	24689	CAFS_CC_T_00190106,CAFS_CC_T_00069470,
GDP metabolic process	GO:0046710	0.0302039	6.96249	2	6	1182	24689	CAFS_CC_T_00240501,CAFS_CC_T_00240500,
alanyl-tRNA aminoacylation	GO:0006419	0.0302039	6.96249	2	6	1182	24689	CAFS_CC_T_00190033,CAFS_CC_T_00069441,
SMAD protein complex assembly	GO:0007183	0.0302039	6.96249	2	6	1182	24689	CAFS_CC_T_00222359,CAFS_CC_T_00097874,
carbon-oxygen lyase activity, acting on phosphates	GO:0016838	0.0303058	6.94999	2	6	1193	24874	CAFS_CC_T_00195770,CAFS_CC_T_00059615,
aromatase activity	GO:0070330	0.0303058	6.94999	2	6	1193	24874	CAFS_CC_T_00211783,CAFS_CC_T_00217319,
alanine-tRNA ligase activity	GO:0004813	0.0303058	6.94999	2	6	1193	24874	CAFS_CC_T_00190033,CAFS_CC_T_00069441,
structural molecule activity conferring elasticity	GO:0097493	0.0303058	6.94999	2	6	1193	24874	CAFS_CC_T_00247673,CAFS_CC_T_00123597,
GTP cyclohydrolase activity	GO:0003933	0.0303058	6.94999	2	6	1193	24874	CAFS_CC_T_00061015,CAFS_CC_T_00081317,
hydrolase activity, acting on ester bonds	GO:0016788	0.030605	1.25803	68	1127	1193	24874	CAFS_CC_T_00068916,CAFS_CC_T_00109579,CAFS_CC_T_00066792,CAFS_CC_T_00109548,CAFS_CC_T_00101203,CAFS_CC_T_00075649,CAFS_CC_T_00202395,CAFS_CC_T_00236161,CAFS_CC_T_00178596,CAFS_CC_T_00116764,CAFS_CC_T_00062736,CAFS_CC_T_00007921,CAFS_CC_T_00228086,CAFS_CC_T_00164418,CAFS_CC_T_00072062,CAFS_CC_T_00124837,CAFS_CC_T_00142278,CAFS_CC_T_00130284,CAFS_CC_T_00039439,CAFS_CC_T_00028757,CAFS_CC_T_00040866,…
cell-substrate adhesion	GO:0031589	0.0306839	1.97052	10	106	1182	24689	CAFS_CC_T_00226371,CAFS_CC_T_00110591,CAFS_CC_T_00139894,CAFS_CC_T_00233839,CAFS_CC_T_00241541,CAFS_CC_T_00012615,CAFS_CC_T_00002394,CAFS_CC_T_00096248,CAFS_CC_T_00110479,CAFS_CC_T_00158497,
purine deoxyribonucleotide metabolic process	GO:0009151	0.0323501	4.1775	3	15	1182	24689	CAFS_CC_T_00124165,CAFS_CC_T_00240501,CAFS_CC_T_00240500,
purine deoxyribonucleotide catabolic process	GO:0009155	0.0323501	4.1775	3	15	1182	24689	CAFS_CC_T_00124165,CAFS_CC_T_00240501,CAFS_CC_T_00240500,
protein-arginine omega-N asymmetric methyltransferase activity	GO:0035242	0.0325002	4.16999	3	15	1193	24874	CAFS_CC_T_00119805,CAFS_CC_T_00202487,CAFS_CC_T_00132079,
larval locomotory behavior	GO:0008345	0.0337227	3.21346	4	26	1182	24689	CAFS_CC_T_00044790,CAFS_CC_T_00228724,CAFS_CC_T_00147740,CAFS_CC_T_00059615,
nucleoside biosynthetic process	GO:0009163	0.0337227	3.21346	4	26	1182	24689	CAFS_CC_T_00186612,CAFS_CC_T_00081317,CAFS_CC_T_00008600,CAFS_CC_T_00245331,
ribonucleoside biosynthetic process	GO:0042455	0.0337227	3.21346	4	26	1182	24689	CAFS_CC_T_00186612,CAFS_CC_T_00081317,CAFS_CC_T_00008600,CAFS_CC_T_00245331,
nucleobase-containing small molecule biosynthetic process	GO:0034404	0.0337227	3.21346	4	26	1182	24689	CAFS_CC_T_00186612,CAFS_CC_T_00081317,CAFS_CC_T_00008600,CAFS_CC_T_00245331,
epithelial structure maintenance	GO:0010669	0.0337227	3.21346	4	26	1182	24689	CAFS_CC_T_00220529,CAFS_CC_T_00191234,CAFS_CC_T_00075447,CAFS_CC_T_00099280,
larval behavior	GO:0030537	0.0337227	3.21346	4	26	1182	24689	CAFS_CC_T_00044790,CAFS_CC_T_00228724,CAFS_CC_T_00147740,CAFS_CC_T_00059615,
nuclear replication fork	GO:0043596	0.0343923	3.19784	4	27	1112	24003	CAFS_CC_T_00075649,CAFS_CC_T_00037595,CAFS_CC_T_00038827,CAFS_CC_T_00198882,
collagen-containing extracellular matrix	GO:0062023	0.0353515	4.04727	3	16	1112	24003	CAFS_CC_T_00110591,CAFS_CC_T_00233839,CAFS_CC_T_00243566,
extracellular matrix structural constituent	GO:0005201	0.0356321	2.24538	7	65	1193	24874	CAFS_CC_T_00212621,CAFS_CC_T_00152205,CAFS_CC_T_00173125,CAFS_CC_T_00223130,CAFS_CC_T_00096248,CAFS_CC_T_00061965,CAFS_CC_T_00220872,
cellular component organization	GO:0016043	0.0360552	1.10821	250	4712	1182	24689	CAFS_CC_T_00247673,CAFS_CC_T_00233024,CAFS_CC_T_00045816,CAFS_CC_T_00233490,CAFS_CC_T_00222359,CAFS_CC_T_00225861,CAFS_CC_T_00067611,CAFS_CC_T_00154116,CAFS_CC_T_00164365,CAFS_CC_T_00120798,CAFS_CC_T_00076578,CAFS_CC_T_00007977,CAFS_CC_T_00042357,CAFS_CC_T_00235231,CAFS_CC_T_00073083,CAFS_CC_T_00182672,CAFS_CC_T_00201020,CAFS_CC_T_00094387,CAFS_CC_T_00138947,CAFS_CC_T_00230833,CAFS_CC_T_00101203,…
cell-cell adhesion	GO:0098609	0.0363385	1.4145	30	443	1182	24689	CAFS_CC_T_00110591,CAFS_CC_T_00134547,CAFS_CC_T_00007547,CAFS_CC_T_00007546,CAFS_CC_T_00152876,CAFS_CC_T_00104743,CAFS_CC_T_00233839,CAFS_CC_T_00158599,CAFS_CC_T_00070725,CAFS_CC_T_00073791,CAFS_CC_T_00014566,CAFS_CC_T_00247404,CAFS_CC_T_00169467,CAFS_CC_T_00203006,CAFS_CC_T_00044700,CAFS_CC_T_00023309,CAFS_CC_T_00159691,CAFS_CC_T_00149878,CAFS_CC_T_00093229,CAFS_CC_T_00079770,CAFS_CC_T_00196605,…
locomotory behavior	GO:0007626	0.0369962	1.66655	15	188	1182	24689	CAFS_CC_T_00046235,CAFS_CC_T_00039924,CAFS_CC_T_00044790,CAFS_CC_T_00228724,CAFS_CC_T_00078545,CAFS_CC_T_00046052,CAFS_CC_T_00113017,CAFS_CC_T_00113033,CAFS_CC_T_00113039,CAFS_CC_T_00148547,CAFS_CC_T_00125085,CAFS_CC_T_00089588,CAFS_CC_T_00203589,CAFS_CC_T_00147740,CAFS_CC_T_00059615,
hydrolase activity, hydrolyzing O-glycosyl compounds	GO:0004553	0.0371633	1.58354	18	237	1193	24874	CAFS_CC_T_00043648,CAFS_CC_T_00166518,CAFS_CC_T_00001305,CAFS_CC_T_00043584,CAFS_CC_T_00228086,CAFS_CC_T_00078694,CAFS_CC_T_00135562,CAFS_CC_T_00230922,CAFS_CC_T_00193093,CAFS_CC_T_00190039,CAFS_CC_T_00238989,CAFS_CC_T_00113033,CAFS_CC_T_00113039,CAFS_CC_T_00163798,CAFS_CC_T_00246539,CAFS_CC_T_00000580,CAFS_CC_T_00200840,CAFS_CC_T_00174138,
microtubule organizing center organization	GO:0031023	0.037399	2.08875	8	80	1182	24689	CAFS_CC_T_00154116,CAFS_CC_T_00020821,CAFS_CC_T_00040427,CAFS_CC_T_00068707,CAFS_CC_T_00060742,CAFS_CC_T_00202947,CAFS_CC_T_00200480,CAFS_CC_T_00092271,
hydrolase activity	GO:0016787	0.0380366	1.12702	192	3552	1193	24874	CAFS_CC_T_00068916,CAFS_CC_T_00225867,CAFS_CC_T_00109579,CAFS_CC_T_00043648,CAFS_CC_T_00080609,CAFS_CC_T_00023191,CAFS_CC_T_00235231,CAFS_CC_T_00166518,CAFS_CC_T_00066792,CAFS_CC_T_00109548,CAFS_CC_T_00167047,CAFS_CC_T_00101203,CAFS_CC_T_00229821,CAFS_CC_T_00075649,CAFS_CC_T_00061015,CAFS_CC_T_00202395,CAFS_CC_T_00236161,CAFS_CC_T_00178596,CAFS_CC_T_00066713,CAFS_CC_T_00224183,CAFS_CC_T_00116764,…
cysteine-type endopeptidase regulator activity involved in apoptotic process	GO:0043028	0.0383507	3.08888	4	27	1193	24874	CAFS_CC_T_00167042,CAFS_CC_T_00044659,CAFS_CC_T_00196289,CAFS_CC_T_00107325,
inflammasome complex	GO:0061702	0.038554	6.16727	2	7	1112	24003	CAFS_CC_T_00234773,CAFS_CC_T_00037991,
chromosome passenger complex	GO:0032133	0.038554	6.16727	2	7	1112	24003	CAFS_CC_T_00020472,CAFS_CC_T_00139031,
SMAD protein complex	GO:0071141	0.038554	6.16727	2	7	1112	24003	CAFS_CC_T_00038866,CAFS_CC_T_00160768,
hydrolase activity, acting on acid phosphorus-nitrogen bonds	GO:0016825	0.0386089	3.90937	3	16	1193	24874	CAFS_CC_T_00140137,CAFS_CC_T_00018755,CAFS_CC_T_00035662,
protein histidine phosphatase activity	GO:0101006	0.0386089	3.90937	3	16	1193	24874	CAFS_CC_T_00140137,CAFS_CC_T_00018755,CAFS_CC_T_00035662,
cell-cell adhesion via plasma-membrane adhesion molecules	GO:0098742	0.0387383	1.59949	17	222	1182	24689	CAFS_CC_T_00110591,CAFS_CC_T_00134547,CAFS_CC_T_00233839,CAFS_CC_T_00158599,CAFS_CC_T_00073791,CAFS_CC_T_00014566,CAFS_CC_T_00169467,CAFS_CC_T_00023309,CAFS_CC_T_00159691,CAFS_CC_T_00149878,CAFS_CC_T_00093229,CAFS_CC_T_00063392,CAFS_CC_T_00008916,CAFS_CC_T_00027663,CAFS_CC_T_00174529,CAFS_CC_T_00129971,CAFS_CC_T_00134046,
microtubule cytoskeleton	GO:0015630	0.0394517	1.31546	44	722	1112	24003	CAFS_CC_T_00120798,CAFS_CC_T_00042357,CAFS_CC_T_00229821,CAFS_CC_T_00205380,CAFS_CC_T_00020472,CAFS_CC_T_00104355,CAFS_CC_T_00162681,CAFS_CC_T_00072071,CAFS_CC_T_00065788,CAFS_CC_T_00020821,CAFS_CC_T_00139031,CAFS_CC_T_00075506,CAFS_CC_T_00040427,CAFS_CC_T_00246070,CAFS_CC_T_00234873,CAFS_CC_T_00023047,CAFS_CC_T_00220211,CAFS_CC_T_00092852,CAFS_CC_T_00068707,CAFS_CC_T_00016678,CAFS_CC_T_00058946,…
cilium movement	GO:0003341	0.0398294	2.06296	8	81	1182	24689	CAFS_CC_T_00192008,CAFS_CC_T_00164435,CAFS_CC_T_00046122,CAFS_CC_T_00051420,CAFS_CC_T_00060742,CAFS_CC_T_00083418,CAFS_CC_T_00104646,CAFS_CC_T_00183067,
appendage morphogenesis	GO:0035107	0.0402256	1.76514	12	142	1182	24689	CAFS_CC_T_00110591,CAFS_CC_T_00220529,CAFS_CC_T_00233839,CAFS_CC_T_00070725,CAFS_CC_T_00072096,CAFS_CC_T_00044423,CAFS_CC_T_00107934,CAFS_CC_T_00060815,CAFS_CC_T_00012277,CAFS_CC_T_00139387,CAFS_CC_T_00094859,CAFS_CC_T_00099280,
fin morphogenesis	GO:0033334	0.0402501	1.88175	10	111	1182	24689	CAFS_CC_T_00110591,CAFS_CC_T_00220529,CAFS_CC_T_00233839,CAFS_CC_T_00070725,CAFS_CC_T_00072096,CAFS_CC_T_00044423,CAFS_CC_T_00107934,CAFS_CC_T_00060815,CAFS_CC_T_00012277,CAFS_CC_T_00099280,
obsolete cytoskeletal anchoring at nuclear membrane	GO:0090286	0.0409603	5.96785	2	7	1182	24689	CAFS_CC_T_00180277,CAFS_CC_T_00041084,
allantoin metabolic process	GO:0000255	0.0409603	5.96785	2	7	1182	24689	CAFS_CC_T_00182973,CAFS_CC_T_00060614,
positive regulation of lymphangiogenesis	GO:1901492	0.0409603	5.96785	2	7	1182	24689	CAFS_CC_T_00215225,CAFS_CC_T_00068638,
deoxyribonucleoside diphosphate metabolic process	GO:0009186	0.0409603	5.96785	2	7	1182	24689	CAFS_CC_T_00240501,CAFS_CC_T_00240500,
dopamine metabolic process	GO:0042417	0.0409603	5.96785	2	7	1182	24689	CAFS_CC_T_00081837,CAFS_CC_T_00014080,
catecholamine biosynthetic process	GO:0042423	0.0409603	5.96785	2	7	1182	24689	CAFS_CC_T_00081837,CAFS_CC_T_00014080,
catechol-containing compound biosynthetic process	GO:0009713	0.0409603	5.96785	2	7	1182	24689	CAFS_CC_T_00081837,CAFS_CC_T_00014080,
negative regulation of cellular carbohydrate metabolic process	GO:0010677	0.0409603	5.96785	2	7	1182	24689	CAFS_CC_T_00175626,CAFS_CC_T_00021024,
cellular amide catabolic process	GO:0043605	0.0409603	5.96785	2	7	1182	24689	CAFS_CC_T_00182973,CAFS_CC_T_00060614,
negative regulation of carbohydrate metabolic process	GO:0045912	0.0409603	5.96785	2	7	1182	24689	CAFS_CC_T_00175626,CAFS_CC_T_00021024,
pantothenate kinase activity	GO:0004594	0.0410961	5.95713	2	7	1193	24874	CAFS_CC_T_00135629,CAFS_CC_T_00161128,
C4-dicarboxylate transmembrane transporter activity	GO:0015556	0.0410961	5.95713	2	7	1193	24874	CAFS_CC_T_00115603,CAFS_CC_T_00171799,
ubiquitin-ubiquitin ligase activity	GO:0034450	0.0410961	5.95713	2	7	1193	24874	CAFS_CC_T_00073777,CAFS_CC_T_00032351,
nucleoside binding	GO:0001882	0.0410961	5.95713	2	7	1193	24874	CAFS_CC_T_00075649,CAFS_CC_T_00198882,
cellular component organization or biogenesis	GO:0071840	0.0418232	1.10112	260	4932	1182	24689	CAFS_CC_T_00247673,CAFS_CC_T_00233024,CAFS_CC_T_00045816,CAFS_CC_T_00233490,CAFS_CC_T_00222359,CAFS_CC_T_00225861,CAFS_CC_T_00067611,CAFS_CC_T_00154116,CAFS_CC_T_00164365,CAFS_CC_T_00120798,CAFS_CC_T_00076578,CAFS_CC_T_00007977,CAFS_CC_T_00042357,CAFS_CC_T_00151039,CAFS_CC_T_00235231,CAFS_CC_T_00073083,CAFS_CC_T_00182672,CAFS_CC_T_00201020,CAFS_CC_T_00094387,CAFS_CC_T_00138947,CAFS_CC_T_00230833,…
positive regulation of GTPase activity	GO:0043547	0.0444756	1.43853	25	363	1182	24689	CAFS_CC_T_00208051,CAFS_CC_T_00078766,CAFS_CC_T_00118013,CAFS_CC_T_00239591,CAFS_CC_T_00104743,CAFS_CC_T_00223600,CAFS_CC_T_00211217,CAFS_CC_T_00160182,CAFS_CC_T_00196506,CAFS_CC_T_00085253,CAFS_CC_T_00014499,CAFS_CC_T_00078545,CAFS_CC_T_00013159,CAFS_CC_T_00084336,CAFS_CC_T_00019798,CAFS_CC_T_00152628,CAFS_CC_T_00093211,CAFS_CC_T_00177990,CAFS_CC_T_00118764,CAFS_CC_T_00166884,CAFS_CC_T_00007242,…
carbohydrate binding	GO:0030246	0.0452218	1.56836	17	226	1193	24874	CAFS_CC_T_00097862,CAFS_CC_T_00116712,CAFS_CC_T_00162671,CAFS_CC_T_00185760,CAFS_CC_T_00043584,CAFS_CC_T_00055548,CAFS_CC_T_00230922,CAFS_CC_T_00184575,CAFS_CC_T_00108435,CAFS_CC_T_00032767,CAFS_CC_T_00189972,CAFS_CC_T_00163798,CAFS_CC_T_00066036,CAFS_CC_T_00000580,CAFS_CC_T_00200840,CAFS_CC_T_00174138,CAFS_CC_T_00163005,
histone-arginine N-methyltransferase activity	GO:0008469	0.0452562	3.6794	3	17	1193	24874	CAFS_CC_T_00119805,CAFS_CC_T_00202487,CAFS_CC_T_00132079,
phosphatidylinositol-3,5-bisphosphate 3-phosphatase activity	GO:0052629	0.0452562	3.6794	3	17	1193	24874	CAFS_CC_T_00098138,CAFS_CC_T_00018755,CAFS_CC_T_00035662,
phosphatidylinositol-3,5-bisphosphate phosphatase activity	GO:0106018	0.0452562	3.6794	3	17	1193	24874	CAFS_CC_T_00098138,CAFS_CC_T_00018755,CAFS_CC_T_00035662,
spindle	GO:0005819	0.045322	1.69043	13	166	1112	24003	CAFS_CC_T_00229821,CAFS_CC_T_00020472,CAFS_CC_T_00020821,CAFS_CC_T_00139031,CAFS_CC_T_00075506,CAFS_CC_T_00246070,CAFS_CC_T_00023047,CAFS_CC_T_00016678,CAFS_CC_T_00113439,CAFS_CC_T_00200480,CAFS_CC_T_00134445,CAFS_CC_T_00247090,CAFS_CC_T_00080206,
cargo receptor activity	GO:0038024	0.0456186	1.91479	9	98	1193	24874	CAFS_CC_T_00097862,CAFS_CC_T_00116712,CAFS_CC_T_00185760,CAFS_CC_T_00217901,CAFS_CC_T_00217479,CAFS_CC_T_00082119,CAFS_CC_T_00147799,CAFS_CC_T_00075736,CAFS_CC_T_00163005,
hydrolase activity, acting on glycosyl bonds	GO:0016798	0.0457326	1.52365	19	260	1193	24874	CAFS_CC_T_00043648,CAFS_CC_T_00166518,CAFS_CC_T_00001305,CAFS_CC_T_00043584,CAFS_CC_T_00228086,CAFS_CC_T_00078694,CAFS_CC_T_00135562,CAFS_CC_T_00230922,CAFS_CC_T_00193093,CAFS_CC_T_00190039,CAFS_CC_T_00238989,CAFS_CC_T_00113033,CAFS_CC_T_00113039,CAFS_CC_T_00163798,CAFS_CC_T_00246539,CAFS_CC_T_00132641,CAFS_CC_T_00000580,CAFS_CC_T_00200840,CAFS_CC_T_00174138,
filopodium tip	GO:0032433	0.0463275	21.5854	1	1	1112	24003	CAFS_CC_T_00032351,
positive regulation of the force of heart contraction	GO:0098735	0.0478756	20.8875	1	1	1182	24689	CAFS_CC_T_00041831,
regulation of AV node cell action potential	GO:0098904	0.0478756	20.8875	1	1	1182	24689	CAFS_CC_T_00041831,
regulation of SA node cell action potential	GO:0098907	0.0478756	20.8875	1	1	1182	24689	CAFS_CC_T_00041831,
regulation of ventricular cardiac muscle cell action potential	GO:0098911	0.0478756	20.8875	1	1	1182	24689	CAFS_CC_T_00041831,
regulation of glutamine family amino acid metabolic process	GO:0000820	0.0478756	20.8875	1	1	1182	24689	CAFS_CC_T_00234776,
regulation of arginine metabolic process	GO:0000821	0.0478756	20.8875	1	1	1182	24689	CAFS_CC_T_00234776,
threonine biosynthetic process	GO:0009088	0.0478756	20.8875	1	1	1182	24689	CAFS_CC_T_00059615,
pyrimidine nucleoside triphosphate catabolic process	GO:0009149	0.0478756	20.8875	1	1	1182	24689	CAFS_CC_T_00164663,
pyrimidine deoxyribonucleoside triphosphate catabolic process	GO:0009213	0.0478756	20.8875	1	1	1182	24689	CAFS_CC_T_00164663,
pyrimidine deoxyribonucleotide catabolic process	GO:0009223	0.0478756	20.8875	1	1	1182	24689	CAFS_CC_T_00164663,
positive regulation of ATPase-coupled calcium transmembrane transporter activity	GO:1901896	0.0478756	20.8875	1	1	1182	24689	CAFS_CC_T_00041831,
regulation of ATPase-coupled calcium transmembrane transporter activity	GO:1901894	0.0478756	20.8875	1	1	1182	24689	CAFS_CC_T_00041831,
positive regulation of cell fate specification	GO:0042660	0.0478756	20.8875	1	1	1182	24689	CAFS_CC_T_00064302,
killing by symbiont of host cells	GO:0001907	0.0478756	20.8875	1	1	1182	24689	CAFS_CC_T_00225867,
positive regulation of cell fate commitment	GO:0010455	0.0478756	20.8875	1	1	1182	24689	CAFS_CC_T_00064302,
regulation of killing of cells of another organism	GO:0051709	0.0478756	20.8875	1	1	1182	24689	CAFS_CC_T_00225867,
positive regulation of killing of cells of another organism	GO:0051712	0.0478756	20.8875	1	1	1182	24689	CAFS_CC_T_00225867,
response to redox state	GO:0051775	0.0478756	20.8875	1	1	1182	24689	CAFS_CC_T_00041831,
induction by virus of host apoptotic process	GO:0019051	0.0478756	20.8875	1	1	1182	24689	CAFS_CC_T_00225867,
modulation by virus of host cellular process	GO:0019054	0.0478756	20.8875	1	1	1182	24689	CAFS_CC_T_00225867,
response to interferon-beta	GO:0035456	0.0478756	20.8875	1	1	1182	24689	CAFS_CC_T_00032351,
cellular response to interferon-beta	GO:0035458	0.0478756	20.8875	1	1	1182	24689	CAFS_CC_T_00032351,
positive regulation of apoptotic process by virus	GO:0060139	0.0478756	20.8875	1	1	1182	24689	CAFS_CC_T_00225867,
calcium-mediated signaling using intracellular calcium source	GO:0035584	0.0478756	20.8875	1	1	1182	24689	CAFS_CC_T_00041831,
modulation by symbiont of host programmed cell death	GO:0052040	0.0478756	20.8875	1	1	1182	24689	CAFS_CC_T_00225867,
positive regulation by symbiont of host programmed cell death	GO:0052042	0.0478756	20.8875	1	1	1182	24689	CAFS_CC_T_00225867,
positive regulation of type I interferon-mediated signaling pathway	GO:0060340	0.0478756	20.8875	1	1	1182	24689	CAFS_CC_T_00032351,
modulation by symbiont of host apoptotic process	GO:0052150	0.0478756	20.8875	1	1	1182	24689	CAFS_CC_T_00225867,
positive regulation by symbiont of host apoptotic process	GO:0052151	0.0478756	20.8875	1	1	1182	24689	CAFS_CC_T_00225867,
response to muscle stretch	GO:0035994	0.0478756	20.8875	1	1	1182	24689	CAFS_CC_T_00041831,
SA node cell action potential	GO:0086015	0.0478756	20.8875	1	1	1182	24689	CAFS_CC_T_00041831,
AV node cell action potential	GO:0086016	0.0478756	20.8875	1	1	1182	24689	CAFS_CC_T_00041831,
SA node cell to atrial cardiac muscle cell signaling	GO:0086018	0.0478756	20.8875	1	1	1182	24689	CAFS_CC_T_00041831,
AV node cell to bundle of His cell signaling	GO:0086027	0.0478756	20.8875	1	1	1182	24689	CAFS_CC_T_00041831,
Purkinje myocyte to ventricular cardiac muscle cell signaling	GO:0086029	0.0478756	20.8875	1	1	1182	24689	CAFS_CC_T_00041831,
AV node cell to bundle of His cell communication	GO:0086067	0.0478756	20.8875	1	1	1182	24689	CAFS_CC_T_00041831,
Purkinje myocyte to ventricular cardiac muscle cell communication	GO:0086068	0.0478756	20.8875	1	1	1182	24689	CAFS_CC_T_00041831,
SA node cell to atrial cardiac muscle cell communication	GO:0086070	0.0478756	20.8875	1	1	1182	24689	CAFS_CC_T_00041831,
dUTP metabolic process	GO:0046080	0.0478756	20.8875	1	1	1182	24689	CAFS_CC_T_00164663,
dUTP catabolic process	GO:0046081	0.0478756	20.8875	1	1	1182	24689	CAFS_CC_T_00164663,
pyrimidine ribonucleoside biosynthetic process	GO:0046132	0.0478756	20.8875	1	1	1182	24689	CAFS_CC_T_00245331,
pyrimidine nucleoside biosynthetic process	GO:0046134	0.0478756	20.8875	1	1	1182	24689	CAFS_CC_T_00245331,
positive regulation of mesodermal cell differentiation	GO:1905772	0.0478756	20.8875	1	1	1182	24689	CAFS_CC_T_00064302,
RNA polymerase III preinitiation complex assembly	GO:0070898	0.0478756	20.8875	1	1	1182	24689	CAFS_CC_T_00186886,
cellular response to caffeine	GO:0071313	0.0478756	20.8875	1	1	1182	24689	CAFS_CC_T_00041831,
cellular response to purine-containing compound	GO:0071415	0.0478756	20.8875	1	1	1182	24689	CAFS_CC_T_00041831,
manganese ion transmembrane transport	GO:0071421	0.0478756	20.8875	1	1	1182	24689	CAFS_CC_T_00041831,
fumarate metabolic process	GO:0006106	0.0478756	20.8875	1	1	1182	24689	CAFS_CC_T_00233024,
pyrimidine nucleotide catabolic process	GO:0006244	0.0478756	20.8875	1	1	1182	24689	CAFS_CC_T_00164663,
regulation of polarized epithelial cell differentiation	GO:0030860	0.0478756	20.8875	1	1	1182	24689	CAFS_CC_T_00212192,
response to caffeine	GO:0031000	0.0478756	20.8875	1	1	1182	24689	CAFS_CC_T_00041831,
modulation by virus of host apoptotic process	GO:0039526	0.0478756	20.8875	1	1	1182	24689	CAFS_CC_T_00225867,
killing of cells of another organism	GO:0031640	0.0478756	20.8875	1	1	1182	24689	CAFS_CC_T_00225867,
positive regulation of mesodermal cell fate specification	GO:0048337	0.0478756	20.8875	1	1	1182	24689	CAFS_CC_T_00064302,
response to magnesium ion	GO:0032026	0.0478756	20.8875	1	1	1182	24689	CAFS_CC_T_00041831,
deoxyribonucleotide metabolic process	GO:0009262	0.0479032	2.88103	4	29	1182	24689	CAFS_CC_T_00124165,CAFS_CC_T_00164663,CAFS_CC_T_00240501,CAFS_CC_T_00240500,
glycosyl compound biosynthetic process	GO:1901659	0.0479032	2.88103	4	29	1182	24689	CAFS_CC_T_00186612,CAFS_CC_T_00081317,CAFS_CC_T_00008600,CAFS_CC_T_00245331,
dUTP diphosphatase activity	GO:0004170	0.0479617	20.85	1	1	1193	24874	CAFS_CC_T_00164663,
terpene synthase activity	GO:0010333	0.0479617	20.85	1	1	1193	24874	CAFS_CC_T_00059615,
sesquiterpene synthase activity	GO:0010334	0.0479617	20.85	1	1	1193	24874	CAFS_CC_T_00059615,
DNA/DNA annealing activity	GO:1990814	0.0479617	20.85	1	1	1193	24874	CAFS_CC_T_00123859,
sabinene synthase activity	GO:0080015	0.0479617	20.85	1	1	1193	24874	CAFS_CC_T_00059615,
alpha-humulene synthase activity	GO:0080017	0.0479617	20.85	1	1	1193	24874	CAFS_CC_T_00059615,
(-)-E-beta-caryophyllene synthase activity	GO:0080016	0.0479617	20.85	1	1	1193	24874	CAFS_CC_T_00059615,
G-rich strand telomeric DNA binding	GO:0098505	0.0479617	20.85	1	1	1193	24874	CAFS_CC_T_00204808,
fumarate hydratase activity	GO:0004333	0.0479617	20.85	1	1	1193	24874	CAFS_CC_T_00233024,
S-methyl-5-thioadenosine phosphorylase activity	GO:0017061	0.0479617	20.85	1	1	1193	24874	CAFS_CC_T_00008600,
threonine synthase activity	GO:0004795	0.0479617	20.85	1	1	1193	24874	CAFS_CC_T_00059615,
suramin binding	GO:0043924	0.0479617	20.85	1	1	1193	24874	CAFS_CC_T_00041831,
obsolete TFIIIB-type transcription factor activity	GO:0001026	0.0479617	20.85	1	1	1193	24874	CAFS_CC_T_00186886,
ATP-dependent DNA/DNA annealing activity	GO:0036310	0.0479617	20.85	1	1	1193	24874	CAFS_CC_T_00123859,
(E)-beta-ocimene synthase activity	GO:0034768	0.0479617	20.85	1	1	1193	24874	CAFS_CC_T_00059615,
isoitalicene synthase activity	GO:0102356	0.0479617	20.85	1	1	1193	24874	CAFS_CC_T_00059615,
chylomicron	GO:0042627	0.0481191	3.59757	3	18	1112	24003	CAFS_CC_T_00178596,CAFS_CC_T_00095666,CAFS_CC_T_00172260,
sulfuric ester hydrolase activity	GO:0008484	0.0481677	2.87586	4	29	1193	24874	CAFS_CC_T_00066792,CAFS_CC_T_00149760,CAFS_CC_T_00166326,CAFS_CC_T_00134725,
sulfur compound binding	GO:1901681	0.0483953	1.67314	13	162	1193	24874	CAFS_CC_T_00233008,CAFS_CC_T_00178596,CAFS_CC_T_00240116,CAFS_CC_T_00074743,CAFS_CC_T_00041831,CAFS_CC_T_00018541,CAFS_CC_T_00040022,CAFS_CC_T_00203886,CAFS_CC_T_00043453,CAFS_CC_T_00168589,CAFS_CC_T_00078467,CAFS_CC_T_00123365,CAFS_CC_T_00000150,
catalytic activity, acting on RNA	GO:0140098	0.0485688	1.36938	31	472	1193	24874	CAFS_CC_T_00235662,CAFS_CC_T_00019964,CAFS_CC_T_00151039,CAFS_CC_T_00027174,CAFS_CC_T_00022718,CAFS_CC_T_00124757,CAFS_CC_T_00236161,CAFS_CC_T_00185767,CAFS_CC_T_00186612,CAFS_CC_T_00035141,CAFS_CC_T_00228086,CAFS_CC_T_00164418,CAFS_CC_T_00054275,CAFS_CC_T_00171176,CAFS_CC_T_00150236,CAFS_CC_T_00097758,CAFS_CC_T_00045274,CAFS_CC_T_00218338,CAFS_CC_T_00240251,CAFS_CC_T_00112038,CAFS_CC_T_00190033,…
chromosome, telomeric repeat region	GO:0140445	0.049852	5.39636	2	8	1112	24003	CAFS_CC_T_00039924,CAFS_CC_T_00204808,
dihydrolipoyl dehydrogenase complex	GO:0045240	0.049852	5.39636	2	8	1112	24003	CAFS_CC_T_00203886,CAFS_CC_T_00078467,
oxoglutarate dehydrogenase complex	GO:0045252	0.049852	5.39636	2	8	1112	24003	CAFS_CC_T_00203886,CAFS_CC_T_00078467,
FACT complex	GO:0035101	0.049852	5.39636	2	8	1112	24003	CAFS_CC_T_00037595,CAFS_CC_T_00038827,
triglyceride-rich plasma lipoprotein particle	GO:0034385	0.049852	5.39636	2	8	1112	24003	CAFS_CC_T_00178596,CAFS_CC_T_00172260,
telomere cap complex	GO:0000782	0.049852	5.39636	2	8	1112	24003	CAFS_CC_T_00039924,CAFS_CC_T_00204808,
nuclear telomere cap complex	GO:0000783	0.049852	5.39636	2	8	1112	24003	CAFS_CC_T_00039924,CAFS_CC_T_00204808,
preribosome, small subunit precursor	GO:0030688	0.049852	5.39636	2	8	1112	24003	CAFS_CC_T_00164418,CAFS_CC_T_00033248,

## Sheet: Enriched terms in three strains
GO_Name	GO_ID
axoneme assembly	GO:0035082
basement membrane organization	GO:0071711
cation binding	GO:0043169
cell projection assembly	GO:0030031
cell-cell adhesion	GO:0098609
cell-cell adhesion via plasma-membrane adhesion molecules	GO:0098742
centriole assembly	GO:0098534
centriole replication	GO:0007099
centrosome cycle	GO:0007098
centrosome duplication	GO:0051298
cilium assembly	GO:0060271
cilium movement	GO:0003341
cilium organization	GO:0044782
cytoskeleton organization	GO:0007010
homophilic cell adhesion via plasma membrane adhesion molecules	GO:0007156
hydrolase activity	GO:0016787
metal ion binding	GO:0046872
microtubule cytoskeleton organization	GO:0000226
microtubule organizing center organization	GO:0031023
microtubule-based process	GO:0007017
plasma membrane bounded cell projection assembly	GO:0120031
S-methyl-5-thioadenosine phosphorylase activity	GO:0017061
