# Supplementary material for: Bulked Segregant Analysis and Association Analysis Identified the Polymorphisms Related to the Intermuscular Bones in Common Carp (Cyprinus carpio)
Source: Biology (Basel). 2022 Mar 21;11(3):477. doi: 10.3390/biology11030477 (PMC8945855; doi:10.3390/biology11030477)
Supplement: Supplementary file 1 [file biology-11-00477-s001.zip › Supplementary-Table-S6.xls]

## Sheet: Supplementary-TableS6-genes in 
The lines marked with yellow mean that these genes have been identified as IB-related genes in other studies.
#GeneID	GOTerms_num	GO_Anno	KEGG_entry	KEGG_url	KOG_class	KOG_class_annotation	NR_ID	E_value	Identity	Score	Annotation	NT_ID	E_value	Identity	Score	Annotation	Swissprot_ID	E_value	Identity	Score	Annotation
CAFS_CC_T_00016354	10	GO:0002040: sprouting angiogenesis (biological_process); GO:0004872: receptor activity (molecular_function); GO:0005887: integral component of plasma membrane (cellular_component); GO:0007158: neuron cell-cell adhesion (biological_process); GO:0009986: cell surface (cellular_component); GO:0042043: neurexin family protein binding (molecular_function); GO:0050804: modulation of synaptic transmissi…	K07378|NLGN	http://www.genome.jp/dbget-bin/www_bget?ko:K07378	[R]	General function prediction only	gi|966638748|gb|KTF73852.1|	0	609/609(100.00)	1194	hypothetical protein cypCar_00038840, partial [Cyprinus carpio]	XM_016282750.1	0	603/614(98.21)	1176	PREDICTED: Sinocyclocheilus grahami neuroligin-1-like (LOC107593140), transcript variant X3, mRNA	sp|Q8N2Q7|NLGN1_HUMAN	5.4e-306	509/599(84.97)	1050	Neuroligin-1 OS=Homo sapiens GN=NLGN1 PE=1 SV=2
CAFS_CC_T_00017071	1	GO:0016021: integral component of membrane (cellular_component);	--	--	[O]	Posttranslational modification, protein turnover, chaperones	gi|1025074408|ref|XP_016338199.1|	0	990/1076(92.01)	2177	PREDICTED: thrombospondin type-1 domain-containing protein 7B-like [Sinocyclocheilus anshuiensis]	XM_016482713.1	0	988/1069(92.42)	2006	PREDICTED: Sinocyclocheilus anshuiensis thrombospondin type-1 domain-containing protein 7B-like (LOC107685951), mRNA	sp|Q9C0I4|THS7B_HUMAN	3.3e-311	507/1084(46.77)	1068	Thrombospondin type-1 domain-containing protein 7B OS=Homo sapiens GN=THSD7B PE=2 SV=2
CAFS_CC_T_00030040	6	GO:0004993: G-protein coupled serotonin receptor activity (molecular_function); GO:0005887: integral component of plasma membrane (cellular_component); GO:0007210: serotonin receptor signaling pathway (biological_process); GO:0007214: gamma-aminobutyric acid signaling pathway (biological_process); GO:0007268: chemical synaptic transmission (biological_process); GO:0032098: regulation of appetite …	K04160|HTR4	http://www.genome.jp/dbget-bin/www_bget?ko:K04160	[R]	General function prediction only	gi|1024978706|ref|XP_016310921.1|	2.3e-214	374/380(98.42)	750	PREDICTED: 5-hydroxytryptamine receptor 4-like isoform X2 [Sinocyclocheilus anshuiensis]	XM_016455435.1	0	374/380(98.42)	726	PREDICTED: Sinocyclocheilus anshuiensis 5-hydroxytryptamine receptor 4-like (LOC107664776), transcript variant X2, mRNA	sp|Q13639|5HT4R_HUMAN	7.4e-157	278/358(77.65)	554	5-hydroxytryptamine receptor 4 OS=Homo sapiens GN=HTR4 PE=2 SV=2
CAFS_CC_T_00032235	4	GO:0000166: nucleotide binding (molecular_function); GO:0006810: transport (biological_process); GO:0016020: membrane (cellular_component); GO:0016887: ATPase activity (molecular_function);	K05668|ABCC5	http://www.genome.jp/dbget-bin/www_bget?ko:K05668	[Q]	Secondary metabolites biosynthesis, transport and catabolism	gi|1025042124|ref|XP_016327940.1|	0	916/1085(84.42)	1704	PREDICTED: multidrug resistance-associated protein 5-like isoform X1 [Sinocyclocheilus anshuiensis]	XM_016472454.1	0	950/1085(87.56)	1679	PREDICTED: Sinocyclocheilus anshuiensis multidrug resistance-associated protein 5-like (LOC107677527), transcript variant X1, mRNA	sp|O15440|MRP5_HUMAN	8.4e-296	570/1092(52.20)	1017	Multidrug resistance-associated protein 5 OS=Homo sapiens GN=ABCC5 PE=1 SV=2
CAFS_CC_T_00082140	8	GO:0002161: aminoacyl-tRNA editing activity (molecular_function); GO:0004823: leucine-tRNA ligase activity (molecular_function); GO:0005524: ATP binding (molecular_function); GO:0005739: mitochondrion (cellular_component); GO:0005829: cytosol (cellular_component); GO:0006429: leucyl-tRNA aminoacylation (biological_process); GO:0006450: regulation of translational fidelity (biological_process); GO…	K01869|LARS, leuS	http://www.genome.jp/dbget-bin/www_bget?ko:K01869	[J]	Translation, ribosomal structure and biogenesis	gi|966672830|gb|KTG06211.1|	0	849/889(95.50)	1712	hypothetical protein cypCar_00008430 [Cyprinus carpio]	XM_016544139.1	0	819/889(92.13)	1622	PREDICTED: Sinocyclocheilus rhinocerous leucyl-tRNA synthetase 2, mitochondrial (lars2), mRNA	sp|Q15031|SYLM_HUMAN	0	567/867(65.40)	1206	Probable leucyl-tRNA synthetase, mitochondrial OS=Homo sapiens GN=LARS2 PE=1 SV=2
CAFS_CC_T_00156188	4	GO:0005085: guanyl-nucleotide exchange factor activity (molecular_function); GO:0005622: intracellular (cellular_component); GO:0007264: small GTPase mediated signal transduction (biological_process); GO:0043547: positive regulation of GTPase activity (biological_process);	K08019|RAPGEF5	http://www.genome.jp/dbget-bin/www_bget?ko:K08019	[T]	Signal transduction mechanisms	gi|1020408066|ref|XP_016122608.1|	1.8e-250	434/446(97.31)	870	PREDICTED: rap guanine nucleotide exchange factor 5-like [Sinocyclocheilus grahami]	XM_016267122.1	0	434/446(97.31)	877	PREDICTED: Sinocyclocheilus grahami rap guanine nucleotide exchange factor 5-like (LOC107581543), mRNA	sp|P83900|RPGF5_RAT	6.5e-168	290/447(64.88)	591	Rap guanine nucleotide exchange factor 5 OS=Rattus norvegicus GN=Rapgef5 PE=2 SV=1
CAFS_CC_T_00041809	5	GO:0005789: endoplasmic reticulum membrane (cellular_component); GO:0005874: microtubule (cellular_component); GO:0007084: mitotic nuclear envelope reassembly (biological_process); GO:0016021: integral component of membrane (cellular_component); GO:0051301: cell division (biological_process);	K17338|REEP1_2_3_4	http://www.genome.jp/dbget-bin/www_bget?ko:K17338	[V]	Defense mechanisms	gi|966704994|gb|KTG37235.1|	3.9e-133	254/254(100.00)	480	hypothetical protein cypCar_00016451 [Cyprinus carpio]	XM_016460534.1	2e-167	242/254(95.28)	477	PREDICTED: Sinocyclocheilus anshuiensis receptor expression-enhancing protein 3-like (LOC107668596), mRNA	sp|Q7ZVX5|REEP3_DANRE	1.8e-82	167/256(65.23)	307	Receptor expression-enhancing protein 3 OS=Danio rerio GN=reep3 PE=2 SV=1
CAFS_CC_T_00039721	7	GO:0004970: ionotropic glutamate receptor activity (molecular_function); GO:0005234: extracellular-glutamate-gated ion channel activity (molecular_function); GO:0016021: integral component of membrane (cellular_component); GO:0030054: cell junction (cellular_component); GO:0034220: ion transmembrane transport (biological_process); GO:0035235: ionotropic glutamate receptor signaling pathway (biolo…	K05206|GRID1	http://www.genome.jp/dbget-bin/www_bget?ko:K05206	[PET]	--	gi|1025282935|ref|XP_016377819.1|	0	749/765(97.91)	1515	PREDICTED: glutamate receptor ionotropic, delta-1-like isoform X1 [Sinocyclocheilus rhinocerous]	XM_016522333.1	0	749/765(97.91)	1499	PREDICTED: Sinocyclocheilus rhinocerous glutamate receptor ionotropic, delta-1-like (LOC107716022), transcript variant X1, mRNA	sp|Q61627|GRID1_MOUSE	0	559/771(72.50)	1145	Glutamate receptor delta-1 subunit OS=Mus musculus GN=Grid1 PE=1 SV=1
CAFS_CC_T_00044244	17	GO:0005634: nucleus (cellular_component); GO:0005829: cytosol (cellular_component); GO:0007275: multicellular organism development (biological_process); GO:0008270: zinc ion binding (molecular_function); GO:0008766: UDP-N-acetylmuramoylalanyl-D-glutamyl-2,6-diaminopimelate-D-alanyl-D-alanine ligase activity (molecular_function); GO:0016021: integral component of membrane (cellular_component); GO:…	K04506|SIAH1	http://www.genome.jp/dbget-bin/www_bget?ko:K04506	[R]	General function prediction only	gi|528507941|ref|XP_005159200.1|	1.2e-113	196/196(100.00)	415	PREDICTED: E3 ubiquitin-protein ligase Siah1 isoform X1 [Danio rerio]	XM_016266537.1	8e-146	196/196(100.00)	415	PREDICTED: Sinocyclocheilus grahami E3 ubiquitin-protein ligase Siah1 (LOC107580928), mRNA	sp|Q7ZVG6|SIAH1_DANRE	3.6e-115	196/196(100.00)	415	E3 ubiquitin-protein ligase Siah1 OS=Danio rerio GN=siah1 PE=2 SV=2
CAFS_CC_T_00044661	10	GO:0000724: double-strand break repair via homologous recombination (biological_process); GO:0003677: DNA binding (molecular_function); GO:0005524: ATP binding (molecular_function); GO:0005634: nucleus (cellular_component); GO:0005694: chromosome (cellular_component); GO:0005737: cytoplasm (cellular_component); GO:0006260: DNA replication (biological_process); GO:0009378: four-way junction helica…	K10901|BLM, RECQL3, SGS1	http://www.genome.jp/dbget-bin/www_bget?ko:K10901	[L]	Replication, recombination and repair	gi|966658385|gb|KTF93239.1|	0	1417/1433(98.88)	2612	hypothetical protein cypCar_00042113 [Cyprinus carpio]	XM_016521309.1	0	1386/1443(96.05)	2666	PREDICTED: Sinocyclocheilus rhinocerous Bloom syndrome protein homolog (LOC107715230), transcript variant X1, mRNA	sp|Q9DEY9|BLM_XENLA	0	664/1391(47.74)	1087	Bloom syndrome protein homolog OS=Xenopus laevis GN=blm PE=2 SV=1
CAFS_CC_T_00046386	--	--	K14832|MAK21, NOC1, CEBPZ	http://www.genome.jp/dbget-bin/www_bget?ko:K14832	--	--	gi|1024969702|ref|XP_016306211.1|	1e-54	105/113(92.92)	219	PREDICTED: uncharacterized protein LOC107661227 [Sinocyclocheilus anshuiensis]	LN599122.1	2e-88	139/146(95.21)	291	Cyprinus carpio genome assembly common carp genome ,scaffold 000014396	sp|P35072|TCB1_CAEBR	1.4e-19	58/145(40.00)	97	Transposable element Tcb1 transposase OS=Caenorhabditis briggsae PE=3 SV=1
CAFS_CC_T_00000795	3	GO:0003677: DNA binding (molecular_function); GO:0006313: transposition, DNA-mediated (biological_process); GO:0015074: DNA integration (biological_process);	K16799|CI	http://www.genome.jp/dbget-bin/www_bget?ko:K16799	--	--	gi|226372474|gb|ACO51862.1|	6.2e-46	86/115(74.78)	189	Transposable element Tc1 transposase [Rana catesbeiana]	LN598256.1	8e-76	115/115(100.00)	245	Cyprinus carpio genome assembly common carp genome ,scaffold 000028433	sp|P35072|TCB1_CAEBR	1.4e-21	45/102(44.12)	103	Transposable element Tcb1 transposase OS=Caenorhabditis briggsae PE=3 SV=1
CAFS_CC_T_00057829	1	GO:0030246: carbohydrate binding (molecular_function);	K17521|CLEC11A	http://www.genome.jp/dbget-bin/www_bget?ko:K17521	[TV]	--	gi|1025135760|ref|XP_016411389.1|	6.2e-153	263/270(97.41)	546	PREDICTED: C-type lectin domain family 11 member A-like [Sinocyclocheilus rhinocerous]	XM_016555903.1	0	263/270(97.41)	554	PREDICTED: Sinocyclocheilus rhinocerous C-type lectin domain family 11 member A-like (LOC107742839), mRNA	sp|O88201|CLC11_RAT	4.6e-52	97/215(45.12)	206	C-type lectin domain family 11 member A OS=Rattus norvegicus GN=Clec11a PE=2 SV=1
CAFS_CC_T_00060660	--	--	--	--	[R]	General function prediction only	gi|966699914|gb|KTG32155.1|	0	1219/1409(86.52)	2177	hypothetical protein cypCar_00013933 [Cyprinus carpio]	XM_015348128.1	0	849/1398(60.73)	1303	PREDICTED: Lepisosteus oculatus SAM and SH3 domain containing 1 (sash1), transcript variant X3, mRNA	sp|O94885|SASH1_HUMAN	3.7e-291	691/1411(48.97)	1002	SAM and SH3 domain-containing protein 1 OS=Homo sapiens GN=SASH1 PE=1 SV=3
CAFS_CC_T_00077630	8	GO:0004630: phospholipase D activity (molecular_function); GO:0005794: Golgi apparatus (cellular_component); GO:0006654: phosphatidic acid biosynthetic process (biological_process); GO:0030334: regulation of cell migration (biological_process); GO:0032534: regulation of microvillus assembly (biological_process); GO:0035091: phosphatidylinositol binding (molecular_function); GO:0048017: inositol l…	K01115|PLD1_2	http://www.genome.jp/dbget-bin/www_bget?ko:K01115	[I]	Lipid transport and metabolism	gi|1024975993|ref|XP_016309486.1|	0	1008/1088(92.65)	2031	PREDICTED: phospholipase D1-like isoform X1 [Sinocyclocheilus anshuiensis]	XM_016530135.1	0	1012/1089(92.93)	2047	PREDICTED: Sinocyclocheilus rhinocerous phospholipase D1-like (LOC107721916), transcript variant X1, mRNA	sp|O08684|PLD1_CRIGR	0	704/1096(64.23)	1407	Phospholipase D1 OS=Cricetulus griseus GN=PLD1 PE=2 SV=1
CAFS_CC_T_00076183	5	GO:0005930: axoneme (cellular_component); GO:0030991: intraciliary transport particle A (cellular_component); GO:0031514: motile cilium (cellular_component); GO:0035721: intraciliary retrograde transport (biological_process); GO:0036064: ciliary basal body (cellular_component);	--	--	[R]	General function prediction only	gi|1025040839|ref|XP_016327595.1|	0	1413/1458(96.91)	2818	PREDICTED: intraflagellar transport protein 140 homolog isoform X1 [Sinocyclocheilus anshuiensis]	XM_016472109.1	0	1413/1458(96.91)	2856	PREDICTED: Sinocyclocheilus anshuiensis intraflagellar transport protein 140 homolog (LOC107677266), transcript variant X1, mRNA	sp|Q96RY7|IF140_HUMAN	0	868/1470(59.05)	1723	Intraflagellar transport protein 140 homolog OS=Homo sapiens GN=IFT140 PE=1 SV=1
CAFS_CC_T_00081468	3	GO:0005215: transporter activity (molecular_function); GO:0006810: transport (biological_process); GO:0016021: integral component of membrane (cellular_component);	K14639|SLC15A5	http://www.genome.jp/dbget-bin/www_bget?ko:K14639	[E]	Amino acid transport and metabolism	gi|1025133019|ref|XP_016351979.1|	0	576/590(97.63)	1155	PREDICTED: solute carrier family 15 member 5 [Sinocyclocheilus anshuiensis]	XM_016496493.1	0	576/590(97.63)	1130	PREDICTED: Sinocyclocheilus anshuiensis solute carrier family 15 member 5 (slc15a5), mRNA	sp|A6NIM6|S15A5_HUMAN	5.5e-157	295/542(54.43)	555	Solute carrier family 15 member 5 OS=Homo sapiens GN=SLC15A5 PE=3 SV=2
CAFS_CC_T_00081475	4	GO:0005829: cytosol (cellular_component); GO:0016079: synaptic vesicle exocytosis (biological_process); GO:0098793: presynapse (cellular_component); GO:1990504: dense core granule exocytosis (biological_process);	--	--	[T]	Signal transduction mechanisms	gi|1025198270|ref|XP_016425320.1|	0	972/1022(95.11)	1949	PREDICTED: calcium-dependent secretion activator 2-like isoform X1 [Sinocyclocheilus rhinocerous]	XM_016569834.1	0	972/1022(95.11)	1964	PREDICTED: Sinocyclocheilus rhinocerous calcium-dependent secretion activator 2-like (LOC107753627), transcript variant X1, mRNA	sp|Q86UW7|CAPS2_HUMAN	0	764/1025(74.54)	1538	Calcium-dependent secretion activator 2 OS=Homo sapiens GN=CADPS2 PE=1 SV=2
CAFS_CC_T_00082660	--	--	--	--	[T]	Signal transduction mechanisms	gi|1025194174|ref|XP_016424213.1|	2.3e-195	372/454(81.94)	688	PREDICTED: 5-hydroxytryptamine receptor 3A-like [Sinocyclocheilus rhinocerous]	XM_016441707.1	0	366/454(80.62)	704	PREDICTED: Sinocyclocheilus anshuiensis 5-hydroxytryptamine receptor 3A-like (LOC107654573), partial mRNA	sp|P46098|5HT3A_HUMAN	4.4e-42	129/476(27.10)	173	5-hydroxytryptamine receptor 3A OS=Homo sapiens GN=HTR3A PE=1 SV=1
CAFS_CC_T_00091620	--	--	--	--	--	--	gi|1025300487|ref|XP_016381132.1|	0	729/950(76.74)	1191	PREDICTED: pleckstrin homology domain-containing family A member 5-like isoform X5 [Sinocyclocheilus rhinocerous]	XM_016525647.1	0	738/943(78.26)	1196	PREDICTED: Sinocyclocheilus rhinocerous pleckstrin homology domain-containing family A member 5-like (LOC107718544), transcript variant X6, mRNA	sp|Q9HAU0|PKHA5_HUMAN	1.1e-99	321/849(37.81)	365	Pleckstrin homology domain-containing family A member 5 OS=Homo sapiens GN=PLEKHA5 PE=1 SV=1
CAFS_CC_T_00090250	--	--	--	--	--	--	--	--	--	--	--	LN590711.1	2e-14	55/120(45.83)	77.8	Cyprinus carpio genome assembly common carp genome, scaffold: LG40, chromosome: 40	--	--	--	--	--
CAFS_CC_T_00094589	3	GO:0007165: signal transduction (biological_process); GO:0016020: membrane (cellular_component); GO:0042221: response to chemical (biological_process);	K04245|CMKLR1	http://www.genome.jp/dbget-bin/www_bget?ko:K04245	--	--	gi|1025131504|ref|XP_016351695.1|	7.7e-153	281/330(85.15)	546	PREDICTED: chemokine-like receptor 1 [Sinocyclocheilus anshuiensis]	LN591259.1	0	271/272(99.63)	562	Cyprinus carpio genome assembly common carp genome ,scaffold 000029063	sp|Q99788|CML1_HUMAN	8.4e-19	90/324(27.78)	95	Chemokine-like receptor 1 OS=Homo sapiens GN=CMKLR1 PE=2 SV=2
CAFS_CC_T_00099912	1	GO:0016021: integral component of membrane (cellular_component);	K16526|AKAP10	http://www.genome.jp/dbget-bin/www_bget?ko:K16526	--	--	gi|1020423862|ref|XP_016131034.1|	1.1e-34	74/78(94.87)	152	PREDICTED: transmembrane protein 211-like [Sinocyclocheilus grahami]	XM_016482586.1	2e-45	73/78(93.59)	152	PREDICTED: Sinocyclocheilus anshuiensis transmembrane protein 211-like (LOC107685851), mRNA	sp|A9UL59|TM211_XENTR	9.2e-13	33/66(50.00)	74	Transmembrane protein 211 OS=Xenopus tropicalis GN=tmem211 PE=2 SV=1
CAFS_CC_T_00100810	--	--	--	--	--	--	--	--	--	--	--	LN590677.1	7e-15	42/67(62.69)	78.2	Cyprinus carpio genome assembly common carp genome, scaffold: LG7, chromosome: 7	--	--	--	--	--
CAFS_CC_T_00115517	3	GO:0006508: proteolysis (biological_process); GO:0008236: serine-type peptidase activity (molecular_function); GO:0016021: integral component of membrane (cellular_component);	K01303|APEH	http://www.genome.jp/dbget-bin/www_bget?ko:K01303	[O]	Posttranslational modification, protein turnover, chaperones	gi|1025295568|ref|XP_016379790.1|	0	864/946(91.33)	1755	PREDICTED: acylamino-acid-releasing enzyme-like [Sinocyclocheilus rhinocerous]	XM_016524304.1	0	870/946(91.97)	1743	PREDICTED: Sinocyclocheilus rhinocerous acylamino-acid-releasing enzyme-like (LOC107717528), mRNA	sp|P13798|ACPH_HUMAN	4.6e-184	350/741(47.23)	646	Acylamino-acid-releasing enzyme OS=Homo sapiens GN=APEH PE=1 SV=4
CAFS_CC_T_00116137	--	--	--	--	--	--	gi|831301535|ref|XP_012682773.1|	1.4e-10	36/75(48.00)	72	PREDICTED: uncharacterized protein LOC105900069 [Clupea harengus]	LN590696.1	2e-58	80/81(98.77)	167	Cyprinus carpio genome assembly common carp genome, scaffold: LG32, chromosome: 32	--	--	--	--	--
CAFS_CC_T_00119926	4	GO:0004872: receptor activity (molecular_function); GO:0007155: cell adhesion (biological_process); GO:0007229: integrin-mediated signaling pathway (biological_process); GO:0008305: integrin complex (cellular_component);	K06588|ITGB5	http://www.genome.jp/dbget-bin/www_bget?ko:K06588	[TW]	--	gi|1024920748|ref|XP_016327413.1|	0	763/791(96.46)	1466	PREDICTED: integrin beta-5 [Sinocyclocheilus anshuiensis]	XM_016471927.1	0	762/791(96.33)	1454	PREDICTED: Sinocyclocheilus anshuiensis integrin subunit beta 5 (itgb5), mRNA	sp|P18084|ITB5_HUMAN	0	574/778(73.78)	1086	Integrin beta-5 OS=Homo sapiens GN=ITGB5 PE=1 SV=1
CAFS_CC_T_00120173	14	GO:0001756: somitogenesis (biological_process); GO:0002042: cell migration involved in sprouting angiogenesis (biological_process); GO:0003404: optic vesicle morphogenesis (biological_process); GO:0005886: plasma membrane (cellular_component); GO:0007155: cell adhesion (biological_process); GO:0007411: axon guidance (biological_process); GO:0007412: axon target recognition (biological_process); G…	K05463|EFNB	http://www.genome.jp/dbget-bin/www_bget?ko:K05463	[T]	Signal transduction mechanisms	gi|1020527673|ref|XP_016103466.1|	8.4e-152	328/333(98.50)	542	PREDICTED: ephrin-B2a [Sinocyclocheilus grahami]	XM_016516384.1	0	328/333(98.50)	573	PREDICTED: Sinocyclocheilus rhinocerous ephrin-B2a (LOC107711395), mRNA	sp|O73874|EFNB2_DANRE	3.8e-149	320/333(96.10)	528	Ephrin-B2a OS=Danio rerio GN=efnb2a PE=2 SV=1
CAFS_CC_T_00123230	3	GO:0004672: protein kinase activity (molecular_function); GO:0005524: ATP binding (molecular_function); GO:0006468: protein phosphorylation (biological_process);	K06103|CASK	http://www.genome.jp/dbget-bin/www_bget?ko:K06103	[T]	Signal transduction mechanisms	gi|1020536810|ref|XP_016106750.1|	0	924/948(97.47)	1872	PREDICTED: peripheral plasma membrane protein CASK isoform X1 [Sinocyclocheilus grahami]	XM_016251264.1	0	924/948(97.47)	1874	PREDICTED: Sinocyclocheilus grahami peripheral plasma membrane protein CASK (LOC107565944), transcript variant X1, mRNA	sp|O14936|CSKP_HUMAN	0	843/948(88.92)	1687	Peripheral plasma membrane protein CASK OS=Homo sapiens GN=CASK PE=1 SV=3
CAFS_CC_T_00123641	5	GO:0002039: p53 binding (molecular_function); GO:0003723: RNA binding (molecular_function); GO:0005634: nucleus (cellular_component); GO:0008270: zinc ion binding (molecular_function); GO:0072332: intrinsic apoptotic signaling pathway by p53 class mediator (biological_process);	--	--	--	--	gi|1024960179|ref|XP_016301099.1|	8e-174	332/413(80.39)	616	PREDICTED: zinc finger protein 385B isoform X1 [Sinocyclocheilus anshuiensis]	XM_016445613.1	0	356/413(86.20)	642	PREDICTED: Sinocyclocheilus anshuiensis zinc finger protein 385B (LOC107657507), transcript variant X1, mRNA	sp|Q6PBT9|Z385B_DANRE	1.4e-167	360/438(82.19)	590	Zinc finger protein 385B OS=Danio rerio GN=znf385b PE=2 SV=1
CAFS_CC_T_00121192	2	GO:0000166: nucleotide binding (molecular_function); GO:0003723: RNA binding (molecular_function);	--	--	[R]	General function prediction only	gi|1025367740|ref|XP_016396924.1|	5.1e-193	348/399(87.22)	679	PREDICTED: RNA-binding motif, single-stranded-interacting protein 1-like isoform X2 [Sinocyclocheilus rhinocerous]	XM_016541438.1	0	363/399(90.98)	697	PREDICTED: Sinocyclocheilus rhinocerous RNA-binding motif, single-stranded-interacting protein 1-like (LOC107730583), transcript variant X2, mRNA	sp|P29558|RBMS1_HUMAN	6.4e-148	273/349(78.22)	525	RNA-binding motif, single-stranded-interacting protein 1 OS=Homo sapiens GN=RBMS1 PE=1 SV=3
CAFS_CC_T_00128576	4	GO:0005622: intracellular (cellular_component); GO:0006886: intracellular protein transport (biological_process); GO:0008270: zinc ion binding (molecular_function); GO:0016192: vesicle-mediated transport (biological_process);	--	--	[U]	Intracellular trafficking, secretion, and vesicular transport	gi|1025255611|ref|XP_016370430.1|	9.3e-205	354/360(98.33)	718	PREDICTED: vacuolar protein sorting-associated protein 8 homolog, partial [Sinocyclocheilus rhinocerous]	XM_016514944.1	0	354/361(98.06)	703	PREDICTED: Sinocyclocheilus rhinocerous vacuolar protein sorting-associated protein 8 homolog (LOC107710204), partial mRNA	sp|Q8N3P4|VPS8_HUMAN	3.9e-171	285/360(79.17)	602	Vacuolar protein sorting-associated protein 8 homolog OS=Homo sapiens GN=VPS8 PE=1 SV=3
CAFS_CC_T_00128333	3	GO:0005096: GTPase activator activity (molecular_function); GO:0007165: signal transduction (biological_process); GO:0043547: positive regulation of GTPase activity (biological_process);	K13736|ARHGAP10	http://www.genome.jp/dbget-bin/www_bget?ko:K13736	[T]	Signal transduction mechanisms	gi|1024928718|ref|XP_016297837.1|	8.4e-250	448/467(95.93)	869	PREDICTED: rho GTPase-activating protein 10 [Sinocyclocheilus anshuiensis]	XM_016555557.1	0	456/508(89.76)	880	PREDICTED: Sinocyclocheilus rhinocerous rho GTPase-activating protein 10-like (LOC107742542), transcript variant X3, mRNA	sp|A1A4S6|RHG10_HUMAN	1.1e-169	308/468(65.81)	597	Rho GTPase-activating protein 10 OS=Homo sapiens GN=ARHGAP10 PE=1 SV=1
CAFS_CC_T_00127888	7	GO:0005198: structural molecule activity (molecular_function); GO:0005913: cell-cell adherens junction (cellular_component); GO:0007155: cell adhesion (biological_process); GO:0015629: actin cytoskeleton (cellular_component); GO:0045296: cadherin binding (molecular_function); GO:0048854: brain morphogenesis (biological_process); GO:0051015: actin filament binding (molecular_function);	K05691|CTNNA	http://www.genome.jp/dbget-bin/www_bget?ko:K05691	[W]	Extracellular structures	gi|966637109|gb|KTF72213.1|	2.2e-131	256/260(98.46)	474	hypothetical protein cypCar_00043123 [Cyprinus carpio]	XM_015034045.1	2e-167	252/260(96.92)	474	PREDICTED: Poecilia latipinna catenin alpha-2-like (LOC106948405), transcript variant X5, mRNA	sp|Q61301|CTNA2_MOUSE	9e-125	240/252(95.24)	447	Catenin alpha-2 OS=Mus musculus GN=Ctnna2 PE=1 SV=3
CAFS_CC_T_00138820	6	GO:0004252: serine-type endopeptidase activity (molecular_function); GO:0005789: endoplasmic reticulum membrane (cellular_component); GO:0016021: integral component of membrane (cellular_component); GO:0016485: protein processing (biological_process); GO:0042058: regulation of epidermal growth factor receptor signaling pathway (biological_process); GO:0050708: regulation of protein secretion (bio…	--	--	[T]	Signal transduction mechanisms	gi|1025385085|ref|XP_016401604.1|	0	876/898(97.55)	1786	PREDICTED: inactive rhomboid protein 1-like isoform X1 [Sinocyclocheilus rhinocerous]	XM_016546118.1	0	876/898(97.55)	1816	PREDICTED: Sinocyclocheilus rhinocerous inactive rhomboid protein 1-like (LOC107734220), transcript variant X1, mRNA	sp|Q6GMF8|RHDF1_DANRE	0	675/898(75.17)	1368	Rhomboid family member 1 OS=Danio rerio GN=rhbdf1 PE=2 SV=1
CAFS_CC_T_00139905	4	GO:0005509: calcium ion binding (molecular_function); GO:0005886: plasma membrane (cellular_component); GO:0007156: homophilic cell adhesion via plasma membrane adhesion molecules (biological_process); GO:0016021: integral component of membrane (cellular_component);	K06802|CDH10	http://www.genome.jp/dbget-bin/www_bget?ko:K06802	[S]	Function unknown	gi|1024952799|ref|XP_016297176.1|	0	740/776(95.36)	1354	PREDICTED: cadherin-10-like [Sinocyclocheilus anshuiensis]	XM_016441690.1	0	740/776(95.36)	1393	PREDICTED: Sinocyclocheilus anshuiensis cadherin-10-like (LOC107654557), mRNA	sp|P79995|CAD10_CHICK	4.4e-281	526/789(66.67)	968	Cadherin-10 OS=Gallus gallus GN=CDH10 PE=2 SV=1
CAFS_CC_T_00004006	6	GO:0003676: nucleic acid binding (molecular_function); GO:0004190: aspartic-type endopeptidase activity (molecular_function); GO:0005634: nucleus (cellular_component); GO:0006508: proteolysis (biological_process); GO:0008270: zinc ion binding (molecular_function); GO:0015074: DNA integration (biological_process);	K04306|LGR7	http://www.genome.jp/dbget-bin/www_bget?ko:K04306	[R]	General function prediction only	gi|317419716|emb|CBN81752.1|	1.8e-69	130/178(73.03)	268	Pol polyprotein [Dicentrarchus labrax]	LN599837.1	9e-111	177/178(99.44)	356	Cyprinus carpio genome assembly common carp genome ,scaffold 000001633	sp|Q8I7P9|POL5_DROME	4e-42	86/180(47.78)	172	Retrovirus-related Pol polyprotein from transposon opus OS=Drosophila melanogaster GN=pol PE=4 SV=1
CAFS_CC_T_00146169	18	GO:0003140: determination of left/right asymmetry in lateral mesoderm (biological_process); GO:0005007: fibroblast growth factor-activated receptor activity (molecular_function); GO:0005524: ATP binding (molecular_function); GO:0005794: Golgi apparatus (cellular_component); GO:0005886: plasma membrane (cellular_component); GO:0006915: apoptotic process (biological_process); GO:0008284: positive r…	K05093|FGFR2	http://www.genome.jp/dbget-bin/www_bget?ko:K05093	[T]	Signal transduction mechanisms	gi|1025050090|ref|XP_016330144.1|	0	821/839(97.85)	1687	PREDICTED: fibroblast growth factor receptor 2 isoform X2 [Sinocyclocheilus anshuiensis]	XM_016474658.1	0	821/839(97.85)	1523	PREDICTED: Sinocyclocheilus anshuiensis fibroblast growth factor receptor 2 (fgfr2), transcript variant X2, mRNA	sp|Q8JG38|FGFR2_DANRE	0	741/819(90.48)	1508	Fibroblast growth factor receptor 2 OS=Danio rerio GN=fgfr2 PE=2 SV=1
CAFS_CC_T_00155504	3	GO:0006897: endocytosis (biological_process); GO:0016307: phosphatidylinositol phosphate kinase activity (molecular_function); GO:0046854: phosphatidylinositol phosphorylation (biological_process);	K00889|E2.7.1.68, PIP5K	http://www.genome.jp/dbget-bin/www_bget?ko:K00889	[T]	Signal transduction mechanisms	gi|1020475443|ref|XP_016142967.1|	3.3e-311	535/550(97.27)	1072	PREDICTED: phosphatidylinositol 4-phosphate 5-kinase type-1 alpha-like [Sinocyclocheilus grahami]	XM_016287481.1	0	535/550(97.27)	1036	PREDICTED: Sinocyclocheilus grahami phosphatidylinositol 4-phosphate 5-kinase type-1 alpha-like (LOC107596688), mRNA	sp|Q99755|PI51A_HUMAN	1.1e-198	359/471(76.22)	694	Phosphatidylinositol-4-phosphate 5-kinase type-1 alpha OS=Homo sapiens GN=PIP5K1A PE=1 SV=1
CAFS_CC_T_00162458	1	GO:0005198: structural molecule activity (molecular_function);	--	--	[W]	Extracellular structures	gi|1024974632|ref|XP_016308829.1|	3.7e-298	526/539(97.59)	1029	PREDICTED: gamma-2-syntrophin-like [Sinocyclocheilus anshuiensis]	XM_016453343.1	0	526/539(97.59)	993	PREDICTED: Sinocyclocheilus anshuiensis gamma-2-syntrophin-like (LOC107663169), mRNA	sp|Q9NY99|SNTG2_HUMAN	5.9e-208	354/526(67.30)	724	Gamma-2-syntrophin OS=Homo sapiens GN=SNTG2 PE=1 SV=2
CAFS_CC_T_00173931	3	GO:0005488: binding (molecular_function); GO:0043170: macromolecule metabolic process (biological_process); GO:0044238: primary metabolic process (biological_process);	--	--	[R]	General function prediction only	gi|317419138|emb|CBN81175.1|	9.4e-96	176/281(62.63)	356	Pol polyprotein [Dicentrarchus labrax]	LN599214.1	0	274/280(97.86)	563	Cyprinus carpio genome assembly common carp genome ,scaffold 000001558	sp|Q05654|RTF21_SCHPO	3.6e-47	98/259(37.84)	189	Retrotransposable element Tf2 155 kDa protein type 1 OS=Schizosaccharomyces pombe GN=Tf2-1 PE=2 SV=1
CAFS_CC_T_00232498	--	--	--	--	--	--	gi|77403693|dbj|BAE46428.1|	1.1e-39	93/140(66.43)	169	ORF1-encoded protein [Danio rerio]	LN590678.1	2e-75	139/139(100.00)	252	Cyprinus carpio genome assembly common carp genome, scaffold: LG28, chromosome: 28	--	--	--	--	--
CAFS_CC_T_00118595	19	GO:0002688: regulation of leukocyte chemotaxis (biological_process); GO:0004715: non-membrane spanning protein tyrosine kinase activity (molecular_function); GO:0004871: signal transducer activity (molecular_function); GO:0005102: receptor binding (molecular_function); GO:0005524: ATP binding (molecular_function); GO:0005856: cytoskeleton (cellular_component); GO:0005925: focal adhesion (cellular…	K05871|PTK2B, FAK2	http://www.genome.jp/dbget-bin/www_bget?ko:K05871	[T]	Signal transduction mechanisms	gi|1020447657|ref|XP_016132870.1|	4.2e-91	162/169(95.86)	340	PREDICTED: protein-tyrosine kinase 2-beta-like [Sinocyclocheilus grahami]	XM_016277385.1	1e-108	162/171(94.74)	342	PREDICTED: Sinocyclocheilus grahami protein-tyrosine kinase 2-beta-like (LOC107589060), transcript variant X2, mRNA	sp|Q14289|FAK2_HUMAN	2.3e-73	127/169(75.15)	276	Protein-tyrosine kinase 2-beta OS=Homo sapiens GN=PTK2B PE=1 SV=2
CAFS_CC_T_00186980	1	GO:0003676: nucleic acid binding (molecular_function);	--	--	--	--	gi|1020485499|ref|XP_016148340.1|	2.1e-90	176/199(88.44)	338	PREDICTED: THAP domain-containing protein 5-like [Sinocyclocheilus grahami]	XM_016292854.1	2e-112	176/199(88.44)	328	PREDICTED: Sinocyclocheilus grahami THAP domain-containing protein 5-like (LOC107600877), mRNA	--	--	--	--	--
CAFS_CC_T_00185141	7	GO:0003700: transcription factor activity, sequence-specific DNA binding (molecular_function); GO:0003707: steroid hormone receptor activity (molecular_function); GO:0005634: nucleus (cellular_component); GO:0006355: regulation of transcription, DNA-templated (biological_process); GO:0008270: zinc ion binding (molecular_function); GO:0043401: steroid hormone mediated signaling pathway (biological…	K08524|NR2B1, RXRA	http://www.genome.jp/dbget-bin/www_bget?ko:K08524	[T]	Signal transduction mechanisms	gi|1020513017|ref|XP_016095688.1|	2.5e-212	407/450(90.44)	744	PREDICTED: retinoic acid receptor RXR-alpha-A-like isoform X1 [Sinocyclocheilus grahami]	XM_016259892.1	0	410/450(91.11)	778	PREDICTED: Sinocyclocheilus grahami retinoic acid receptor RXR-alpha-A (LOC107573462), transcript variant X1, mRNA	sp|A2T929|RXRAA_DANRE	1.7e-208	375/422(88.86)	726	Retinoic acid receptor RXR-alpha-A OS=Danio rerio GN=rxraa PE=2 SV=2
CAFS_CC_T_00187315	5	GO:0005737: cytoplasm (cellular_component); GO:0007165: signal transduction (biological_process); GO:0008093: cytoskeletal adaptor activity (molecular_function); GO:0030507: spectrin binding (molecular_function); GO:0072661: protein targeting to plasma membrane (biological_process);	K10380|ANK	http://www.genome.jp/dbget-bin/www_bget?ko:K10380	[M]	Cell wall/membrane/envelope biogenesis	gi|1020449409|ref|XP_016133126.1|	0	1085/1116(97.22)	2072	PREDICTED: ankyrin-1-like isoform X1 [Sinocyclocheilus grahami]	XM_016506243.1	0	1874/1946(96.30)	3660	PREDICTED: Sinocyclocheilus anshuiensis ankyrin-1-like (LOC107703564), mRNA	sp|Q02357|ANK1_MOUSE	0	612/976(62.70)	1140	Ankyrin-1 OS=Mus musculus GN=Ank1 PE=1 SV=2
CAFS_CC_T_00185737	11	GO:0004674: protein serine/threonine kinase activity (molecular_function); GO:0004871: signal transducer activity (molecular_function); GO:0005524: ATP binding (molecular_function); GO:0005634: nucleus (cellular_component); GO:0005794: Golgi apparatus (cellular_component); GO:0006468: protein phosphorylation (biological_process); GO:0007399: nervous system development (biological_process); GO:000…	K05743|LIMK1	http://www.genome.jp/dbget-bin/www_bget?ko:K05743	--	--	gi|966672008|gb|KTG05389.1|	0	608/619(98.22)	1249	hypothetical protein cypCar_00001954 [Cyprinus carpio]	XM_016518591.1	0	572/617(92.71)	1159	PREDICTED: Sinocyclocheilus rhinocerous LIM domain kinase 1-like (LOC107713159), mRNA	sp|P53667|LIMK1_HUMAN	2.6e-199	350/602(58.14)	696	LIM domain kinase 1 OS=Homo sapiens GN=LIMK1 PE=1 SV=3
CAFS_CC_T_00191231	2	GO:0005634: nucleus (cellular_component); GO:0008270: zinc ion binding (molecular_function);	K06709|JMJD2, JHDM3	http://www.genome.jp/dbget-bin/www_bget?ko:K06709	[L]	Replication, recombination and repair	gi|1025293802|ref|XP_016379306.1|	0	615/647(95.05)	1104	PREDICTED: lysine-specific demethylase 4B-like isoform X1 [Sinocyclocheilus rhinocerous]	XM_016523820.1	0	681/720(94.58)	1173	PREDICTED: Sinocyclocheilus rhinocerous lysine-specific demethylase 4B-like (LOC107717157), transcript variant X1, mRNA	sp|Q91VY5|KDM4B_MOUSE	1.9e-207	412/725(56.83)	723	Lysine-specific demethylase 4B OS=Mus musculus GN=Kdm4b PE=1 SV=1
CAFS_CC_T_00192218	2	GO:0060271: cilium assembly (biological_process); GO:0060287: epithelial cilium movement involved in determination of left/right asymmetry (biological_process);	K16802|CEP70	http://www.genome.jp/dbget-bin/www_bget?ko:K16802	--	--	gi|966707707|gb|KTG39947.1|	2.8e-161	352/373(94.37)	574	hypothetical protein cypCar_00029560, partial [Cyprinus carpio]	XM_016551421.1	0	357/431(82.83)	613	PREDICTED: Sinocyclocheilus rhinocerous centrosomal protein 70 (cep70), transcript variant X2, mRNA	sp|Q6IQY5|CEP70_MOUSE	2e-34	83/225(36.89)	148	Centrosomal protein of 70 kDa OS=Mus musculus GN=Cep70 PE=2 SV=1
CAFS_CC_T_00238441	5	GO:0005524: ATP binding (molecular_function); GO:0005737: cytoplasm (cellular_component); GO:0006457: protein folding (biological_process); GO:0051082: unfolded protein binding (molecular_function); GO:0070121: Kupffer's vesicle development (biological_process);	K09493|CCT1, TCP1	http://www.genome.jp/dbget-bin/www_bget?ko:K09493	[O]	Posttranslational modification, protein turnover, chaperones	gi|1025120180|ref|XP_016349797.1|	7.9e-304	549/558(98.39)	1048	PREDICTED: T-complex protein 1 subunit alpha [Sinocyclocheilus anshuiensis]	XM_016494311.1	0	549/558(98.39)	1123	PREDICTED: Sinocyclocheilus anshuiensis T-complex protein 1 subunit alpha (LOC107694622), mRNA	sp|Q9W790|TCPA_PALPA	1.2e-277	493/558(88.35)	956	T-complex protein 1 subunit alpha OS=Paleosuchus palpebrosus GN=TCP1 PE=2 SV=1
CAFS_CC_T_00213059	--	--	--	--	--	--	--	--	--	--	--	LN595112.1	6e-148	182/184(98.91)	355	Cyprinus carpio genome assembly common carp genome ,scaffold 000002009	--	--	--	--	--
CAFS_CC_T_00218704	--	--	K09515|DNAJB9	http://www.genome.jp/dbget-bin/www_bget?ko:K09515	[O]	Posttranslational modification, protein turnover, chaperones	gi|966635782|gb|KTF70890.1|	1.1e-83	207/213(97.18)	315	hypothetical protein cypCar_00045830 [Cyprinus carpio]	XM_016278901.1	4e-131	198/216(91.67)	378	PREDICTED: Sinocyclocheilus grahami dnaJ homolog subfamily B member 9-like (LOC107590229), mRNA	sp|Q5R9A4|DNJB9_PONAB	7.5e-50	119/222(53.60)	198	DnaJ homolog subfamily B member 9 OS=Pongo abelii GN=DNAJB9 PE=2 SV=1
CAFS_CC_T_00221150	9	GO:0004017: adenylate kinase activity (molecular_function); GO:0004550: nucleoside diphosphate kinase activity (molecular_function); GO:0005524: ATP binding (molecular_function); GO:0005737: cytoplasm (cellular_component); GO:0006165: nucleoside diphosphate phosphorylation (biological_process); GO:0006172: ADP biosynthetic process (biological_process); GO:0009142: nucleoside triphosphate biosynth…	K00939|E2.7.4.3, adk	http://www.genome.jp/dbget-bin/www_bget?ko:K00939	[F]	Nucleotide transport and metabolism	gi|1025369808|ref|XP_016397479.1|	2.4e-183	322/329(97.87)	647	PREDICTED: adenylate kinase isoenzyme 5-like [Sinocyclocheilus rhinocerous]	XM_016541993.1	0	322/329(97.87)	651	PREDICTED: Sinocyclocheilus rhinocerous adenylate kinase isoenzyme 5-like (LOC107731024), mRNA	sp|Q920P5|KAD5_MOUSE	3.1e-106	182/325(56.00)	386	Adenylate kinase isoenzyme 5 OS=Mus musculus GN=Ak5 PE=2 SV=2
CAFS_CC_T_00085046	3	GO:0004497: monooxygenase activity (molecular_function); GO:0016705: oxidoreductase activity, acting on paired donors, with incorporation or reduction of molecular oxygen (molecular_function); GO:0046872: metal ion binding (molecular_function);	K17852|CYP2AA_D	http://www.genome.jp/dbget-bin/www_bget?ko:K17852	[Q]	Secondary metabolites biosynthesis, transport and catabolism	gi|1024971919|ref|XP_016307411.1|	1.6e-276	465/499(93.19)	957	PREDICTED: cytochrome P450 2J2-like [Sinocyclocheilus anshuiensis]	XM_016229224.1	0	460/499(92.18)	927	PREDICTED: Sinocyclocheilus grahami cytochrome P450 2J2-like (LOC107548517), mRNA	sp|P51589|CP2J2_HUMAN	4.6e-114	209/454(46.04)	412	Cytochrome P450 2J2 OS=Homo sapiens GN=CYP2J2 PE=1 SV=2
CAFS_CC_T_00229671	8	GO:0001757: somite specification (biological_process); GO:0003677: DNA binding (molecular_function); GO:0005634: nucleus (cellular_component); GO:0006355: regulation of transcription, DNA-templated (biological_process); GO:0007219: Notch signaling pathway (biological_process); GO:0021794: thalamus development (biological_process); GO:0045664: regulation of neuron differentiation (biological_proce…	K06054|HES1	http://www.genome.jp/dbget-bin/www_bget?ko:K06054	[K]	Transcription	gi|966711198|gb|KTG43436.1|	1.1e-141	264/267(98.88)	508	hypothetical protein cypCar_00003268 [Cyprinus carpio]	XM_016476396.1	2e-179	242/245(98.78)	503	PREDICTED: Sinocyclocheilus anshuiensis transcription factor HES-1-like (LOC107680502), mRNA	sp|Q6IRB2|HES1A_XENLA	4.4e-103	206/270(76.30)	375	Transcription factor HES-1-A OS=Xenopus laevis GN=hes1-a PE=1 SV=1
CAFS_CC_T_00238067	4	GO:0005509: calcium ion binding (molecular_function); GO:0005886: plasma membrane (cellular_component); GO:0007156: homophilic cell adhesion via plasma membrane adhesion molecules (biological_process); GO:0016021: integral component of membrane (cellular_component);	K16498|PCDHD1	http://www.genome.jp/dbget-bin/www_bget?ko:K16498	--	--	gi|528486199|ref|XP_005166554.1|	3.6e-48	96/103(93.20)	196	PREDICTED: protocadherin-7 isoform X2 [Danio rerio]	XM_678029.7	1e-57	96/103(93.20)	200	PREDICTED: Danio rerio protocadherin 7b (pcdh7b), transcript variant X1, mRNA	sp|O60245|PCDH7_HUMAN	4.1e-44	83/102(81.37)	178	Protocadherin-7 OS=Homo sapiens GN=PCDH7 PE=1 SV=2
CAFS_CC_T_00241112	2	GO:0000462: maturation of SSU-rRNA from tricistronic rRNA transcript (SSU-rRNA, 5.8S rRNA, LSU-rRNA) (biological_process); GO:0000479: endonucleolytic cleavage of tricistronic rRNA transcript (SSU-rRNA, 5.8S rRNA, LSU-rRNA) (biological_process);	K14785|ESF2, ABT1	http://www.genome.jp/dbget-bin/www_bget?ko:K14785	--	--	gi|1020487733|ref|XP_016149530.1|	4.6e-24	76/138(55.07)	116	PREDICTED: activator of basal transcription 1-like isoform X1 [Sinocyclocheilus grahami]	LN591178.1	1e-25	43/53(81.13)	81.3	Cyprinus carpio genome assembly common carp genome ,scaffold 000028916	--	--	--	--	--
CAFS_CC_T_00241597	1	GO:0008270: zinc ion binding (molecular_function);	K11350|BRPF3	http://www.genome.jp/dbget-bin/www_bget?ko:K11350	[R]	General function prediction only	gi|966653405|gb|KTF88307.1|	0	1227/1228(99.92)	2235	hypothetical protein cypCar_00020023 [Cyprinus carpio]	XM_016534517.1	0	1181/1229(96.09)	2125	PREDICTED: Sinocyclocheilus rhinocerous bromodomain and PHD finger-containing protein 3-like (LOC107725302), mRNA	sp|Q9ULD4|BRPF3_HUMAN	0	748/1269(58.94)	1308	Bromodomain and PHD finger-containing protein 3 OS=Homo sapiens GN=BRPF3 PE=1 SV=2
CAFS_CC_T_00241685	--	--	K12495|IQSEC	http://www.genome.jp/dbget-bin/www_bget?ko:K12495	[U]	Intracellular trafficking, secretion, and vesicular transport	gi|1020496140|ref|XP_016086684.1|	0	1015/1257(80.75)	1605	PREDICTED: IQ motif and SEC7 domain-containing protein 2-like isoform X1 [Sinocyclocheilus grahami]	XM_016231198.1	0	870/955(91.10)	1405	PREDICTED: Sinocyclocheilus grahami IQ motif and SEC7 domain-containing protein 2-like (LOC107549994), transcript variant X1, mRNA	sp|Q5JU85|IQEC2_HUMAN	6.3e-281	603/962(62.68)	968	IQ motif and SEC7 domain-containing protein 2 OS=Homo sapiens GN=IQSEC2 PE=1 SV=1
CAFS_CC_T_00239814	4	GO:0004930: G-protein coupled receptor activity (molecular_function); GO:0007166: cell surface receptor signaling pathway (biological_process); GO:0007186: G-protein coupled receptor signaling pathway (biological_process); GO:0016021: integral component of membrane (cellular_component);	K08465|GPR133	http://www.genome.jp/dbget-bin/www_bget?ko:K08465	--	--	gi|1024965741|ref|XP_016304077.1|	5.5e-226	418/429(97.44)	789	PREDICTED: adhesion G-protein coupled receptor D1-like [Sinocyclocheilus anshuiensis]	XM_016535728.1	0	420/446(94.17)	859	PREDICTED: Sinocyclocheilus rhinocerous adhesion G-protein coupled receptor D1-like (LOC107726205), mRNA	sp|Q80T32|GP133_MOUSE	7.4e-90	202/450(44.89)	332	Probable G-protein coupled receptor 133 OS=Mus musculus GN=Gpr133 PE=2 SV=2
CAFS_CC_T_00240596	--	--	--	--	--	--	--	--	--	--	--	LN590685.1	7e-43	101/107(94.39)	157	Cyprinus carpio genome assembly common carp genome, scaffold: LG16, chromosome: 16	--	--	--	--	--
CAFS_CC_T_00245843	5	GO:0000981: RNA polymerase II transcription factor activity, sequence-specific DNA binding (molecular_function); GO:0003676: nucleic acid binding (molecular_function); GO:0005634: nucleus (cellular_component); GO:0006357: regulation of transcription from RNA polymerase II promoter (biological_process); GO:0046872: metal ion binding (molecular_function);	K09193|SP3	http://www.genome.jp/dbget-bin/www_bget?ko:K09193	[R]	General function prediction only	gi|966708592|gb|KTG40830.1|	1.4e-297	632/633(99.84)	1028	hypothetical protein cypCar_00041805, partial [Cyprinus carpio]	XM_016556040.1	0	660/710(92.96)	1014	PREDICTED: Sinocyclocheilus rhinocerous transcription factor Sp3-like (LOC107742953), transcript variant X2, mRNA	sp|Q90WR8|SP3_CHICK	1e-135	393/696(56.47)	485	Transcription factor Sp3 OS=Gallus gallus GN=SP3 PE=1 SV=1
CAFS_CC_T_00205897	--	--	--	--	--	--	gi|768939444|ref|XP_011609773.1|	2.5e-26	84/188(44.68)	125	PREDICTED: uncharacterized protein LOC105417480 [Takifugu rubripes]	LN591006.1	5e-36	111/177(62.71)	142	Cyprinus carpio genome assembly common carp genome ,scaffold 000001124	--	--	--	--	--
CAFS_CC_T_00206045	--	--	--	--	[L]	Replication, recombination and repair	gi|929299248|ref|XP_014027025.1|	2.7e-61	150/302(49.67)	241	PREDICTED: zinc finger BED domain-containing protein 4-like isoform X1 [Salmo salar]	LN590685.1	5e-106	170/176(96.59)	347	Cyprinus carpio genome assembly common carp genome, scaffold: LG16, chromosome: 16	sp|O96006|ZBED1_HUMAN	2e-24	92/319(28.84)	114	Zinc finger BED domain-containing protein 1 OS=Homo sapiens GN=ZBED1 PE=1 SV=1
CAFS_CC_T_00227981	--	--	--	--	--	--	--	--	--	--	--	LN590779.1	7e-23	59/87(67.82)	100	Cyprinus carpio genome assembly common carp genome ,scaffold 000000222	--	--	--	--	--
CAFS_CC_T_00082263	4	GO:0004222: metalloendopeptidase activity (molecular_function); GO:0005578: proteinaceous extracellular matrix (cellular_component); GO:0006508: proteolysis (biological_process); GO:0008270: zinc ion binding (molecular_function);	K08630|ADAMTS16	http://www.genome.jp/dbget-bin/www_bget?ko:K08630	[O]	Posttranslational modification, protein turnover, chaperones	gi|1025089547|ref|XP_016342360.1|	0	1185/1240(95.56)	2506	PREDICTED: A disintegrin and metalloproteinase with thrombospondin motifs 16-like [Sinocyclocheilus anshuiensis]	XM_016486874.1	0	1185/1240(95.56)	2410	PREDICTED: Sinocyclocheilus anshuiensis A disintegrin and metalloproteinase with thrombospondin motifs 16-like (LOC107689003), mRNA	sp|Q8TE57|ATS16_HUMAN	0	746/1187(62.85)	1605	A disintegrin and metalloproteinase with thrombospondin motifs 16 OS=Homo sapiens GN=ADAMTS16 PE=1 SV=3
CAFS_CC_T_00051281	9	GO:0003700: transcription factor activity, sequence-specific DNA binding (molecular_function); GO:0005634: nucleus (cellular_component); GO:0006355: regulation of transcription, DNA-templated (biological_process); GO:0006366: transcription from RNA polymerase II promoter (biological_process); GO:0007165: signal transduction (biological_process); GO:0022008: neurogenesis (biological_process); GO:0…	--	--	[K]	Transcription	gi|1025154181|ref|XP_016417120.1|	0	1176/1325(88.75)	1918	PREDICTED: sal-like protein 3 [Sinocyclocheilus rhinocerous]	XM_016561634.1	0	1224/1325(92.38)	2077	PREDICTED: Sinocyclocheilus rhinocerous sal-like protein 3 (LOC107747198), mRNA	sp|Q62255|SALL3_MOUSE	5.6e-260	717/1423(50.39)	899	Sal-like protein 3 OS=Mus musculus GN=Sall3 PE=2 SV=2
CAFS_CC_T_00049710	3	GO:0003676: nucleic acid binding (molecular_function); GO:0004386: helicase activity (molecular_function); GO:0005524: ATP binding (molecular_function);	K01529|E3.6.1.-	http://www.genome.jp/dbget-bin/www_bget?ko:K01529	[A]	RNA processing and modification	gi|1025288917|ref|XP_016378084.1|	0	800/833(96.04)	1611	PREDICTED: activating signal cointegrator 1 complex subunit 3-like, partial [Sinocyclocheilus rhinocerous]	XM_016522598.1	0	800/833(96.04)	1662	PREDICTED: Sinocyclocheilus rhinocerous activating signal cointegrator 1 complex subunit 3-like (LOC107716218), partial mRNA	sp|Q8N3C0|HELC1_HUMAN	0	551/763(72.21)	1126	Activating signal cointegrator 1 complex subunit 3 OS=Homo sapiens GN=ASCC3 PE=1 SV=3
CAFS_CC_T_00059525	7	GO:0000307: cyclin-dependent protein kinase holoenzyme complex (cellular_component); GO:0005634: nucleus (cellular_component); GO:0016020: membrane (cellular_component); GO:0016538: cyclin-dependent protein serine/threonine kinase regulator activity (molecular_function); GO:0045737: positive regulation of cyclin-dependent protein serine/threonine kinase activity (biological_process); GO:0045944: …	--	--	[D]	Cell cycle control, cell division, chromosome partitioning	gi|118763936|gb|AAI28854.1|	4.8e-24	59/78(75.64)	117	Ccnk protein [Danio rerio]	XM_016238056.1	1e-39	61/90(67.78)	116	PREDICTED: Sinocyclocheilus grahami cyclin-K-like (LOC107555300), mRNA	sp|O75909|CCNK_HUMAN	5.7e-22	52/78(66.67)	105	Cyclin-K OS=Homo sapiens GN=CCNK PE=1 SV=2
CAFS_CC_T_00008711	6	GO:0003677: DNA binding (molecular_function); GO:0003743: translation initiation factor activity (molecular_function); GO:0005673: transcription factor TFIIE complex (cellular_component); GO:0006355: regulation of transcription, DNA-templated (biological_process); GO:0006367: transcription initiation from RNA polymerase II promoter (biological_process); GO:0006413: translational initiation (biolo…	K03137|TFIIE2, GTF2E2, TFA2	http://www.genome.jp/dbget-bin/www_bget?ko:K03137	[K]	Transcription	gi|966700053|gb|KTG32294.1|	3.3e-136	284/290(97.93)	490	hypothetical protein cypCar_00024357 [Cyprinus carpio]	XM_016565816.1	7e-145	274/289(94.81)	419	PREDICTED: Sinocyclocheilus rhinocerous general transcription factor IIE subunit 2-like (LOC107750445), mRNA	sp|Q2KJF9|T2EB_BOVIN	7.3e-112	227/290(78.28)	404	General transcription factor IIE subunit 2 OS=Bos taurus GN=GTF2E2 PE=2 SV=1
CAFS_CC_T_00008200	--	--	--	--	--	--	--	--	--	--	--	LN590673.1	8e-56	88/88(100.00)	184	Cyprinus carpio genome assembly common carp genome, scaffold: LG45, chromosome: 45	--	--	--	--	--
CAFS_CC_T_00005120	--	--	--	--	--	--	gi|939313157|ref|XP_014262699.1|	9.9e-170	287/368(77.99)	602	PREDICTED: uncharacterized protein LOC106674530 [Maylandia zebra]	XM_014407213.1	0	289/369(78.32)	591	PREDICTED: Maylandia zebra uncharacterized LOC106674530 (LOC106674530), mRNA	--	--	--	--	--
CAFS_CC_T_00012395	1	GO:0016020: membrane (cellular_component);	--	--	--	--	gi|966646139|gb|KTF81051.1|	1.4e-281	509/545(93.39)	974	hypothetical protein cypCar_00015813 [Cyprinus carpio]	XM_014031080.1	0	303/530(57.17)	548	PREDICTED: Austrofundulus limnaeus uncharacterized LOC106534417 (LOC106534417), mRNA	--	--	--	--	--
CAFS_CC_T_00014617	3	GO:0001104: RNA polymerase II transcription cofactor activity (molecular_function); GO:0006357: regulation of transcription from RNA polymerase II promoter (biological_process); GO:0016592: mediator complex (cellular_component);	K15164|MED13	http://www.genome.jp/dbget-bin/www_bget?ko:K15164	[K]	Transcription	gi|1020406463|ref|XP_016118296.1|	0	2101/2153(97.58)	4056	PREDICTED: mediator of RNA polymerase II transcription subunit 13 [Sinocyclocheilus grahami]	XM_016262810.1	0	2094/2154(97.21)	3998	PREDICTED: Sinocyclocheilus grahami mediator complex subunit 13 (med13), mRNA	sp|Q5SWW4|MED13_MOUSE	0	1525/2199(69.35)	2897	Mediator of RNA polymerase II transcription subunit 13 OS=Mus musculus GN=Med13 PE=2 SV=1
CAFS_CC_T_00014735	6	GO:0000149: SNARE binding (molecular_function); GO:0000323: lytic vacuole (cellular_component); GO:0005768: endosome (cellular_component); GO:0010508: positive regulation of autophagy (biological_process); GO:0035493: SNARE complex assembly (biological_process); GO:0060627: regulation of vesicle-mediated transport (biological_process);	--	--	[R]	General function prediction only	gi|966642405|gb|KTF77317.1|	2.9e-104	195/197(98.98)	384	hypothetical protein cypCar_00045702, partial [Cyprinus carpio]	XM_016263457.1	4e-126	185/197(93.91)	385	PREDICTED: Sinocyclocheilus grahami UV radiation resistance-associated gene protein-like (LOC107577365), transcript variant X2, mRNA	sp|Q9P2Y5|UVRAG_HUMAN	7.2e-31	90/211(42.65)	135	UV radiation resistance-associated gene protein OS=Homo sapiens GN=UVRAG PE=1 SV=1
CAFS_CC_T_00015197	4	GO:0005737: cytoplasm (cellular_component); GO:0017137: Rab GTPase binding (molecular_function); GO:0043231: intracellular membrane-bounded organelle (cellular_component); GO:0045055: regulated exocytosis (biological_process);	K12484|RAB11FIP1_2_5	http://www.genome.jp/dbget-bin/www_bget?ko:K12484	--	--	gi|1025146741|ref|XP_016415817.1|	0	1121/1415(79.22)	1365	PREDICTED: rab11 family-interacting protein 1-like isoform X1 [Sinocyclocheilus rhinocerous]	XM_016447123.1	0	532/622(85.53)	905	PREDICTED: Sinocyclocheilus anshuiensis zinc finger CCCH domain-containing protein 13-like (LOC107658532), mRNA	sp|Q7L804|RFIP2_HUMAN	5.4e-56	140/290(48.28)	221	Rab11 family-interacting protein 2 OS=Homo sapiens GN=RAB11FIP2 PE=1 SV=1
CAFS_CC_T_00019284	--	--	--	--	--	--	gi|1025186112|ref|XP_016422333.1|	0	2780/2974(93.48)	4056	PREDICTED: protein bassoon-like isoform X2 [Sinocyclocheilus rhinocerous]	XM_016566847.1	0	2937/3058(96.04)	4457	PREDICTED: Sinocyclocheilus rhinocerous protein bassoon-like (LOC107751196), transcript variant X2, mRNA	sp|Q9UPA5|BSN_HUMAN	0	1430/3181(44.95)	1286	Protein bassoon OS=Homo sapiens GN=BSN PE=1 SV=4
CAFS_CC_T_00026431	--	--	K08435|GPR151	http://www.genome.jp/dbget-bin/www_bget?ko:K08435	--	--	gi|1020548230|ref|XP_016109101.1|	1.9e-203	362/388(93.30)	714	PREDICTED: probable G-protein coupled receptor 151 [Sinocyclocheilus grahami]	LN594965.1	0	388/388(100.00)	751	Cyprinus carpio genome assembly common carp genome ,scaffold 000001460	--	--	--	--	--
CAFS_CC_T_00024913	--	--	K14282|TACC2	http://www.genome.jp/dbget-bin/www_bget?ko:K14282	--	--	gi|1025023460|ref|XP_016323157.1|	0	2052/2527(81.20)	3611	PREDICTED: uncharacterized protein LOC107673862 [Sinocyclocheilus anshuiensis]	LN590672.1	0	2227/2338(95.25)	4145	Cyprinus carpio genome assembly common carp genome, scaffold: LG37, chromosome: 37	--	--	--	--	--
CAFS_CC_T_00030668	1	GO:0016740: transferase activity (molecular_function);	K16502|CDHR2, PCDH24, PCLKC	http://www.genome.jp/dbget-bin/www_bget?ko:K16502	[R]	General function prediction only	gi|1020541832|ref|XP_016107777.1|	5.5e-97	191/268(71.27)	360	PREDICTED: uncharacterized protein LOC107566763, partial [Sinocyclocheilus grahami]	LN590711.1	6e-149	261/349(74.79)	472	Cyprinus carpio genome assembly common carp genome, scaffold: LG40, chromosome: 40	sp|Q99315|YG31B_YEAST	9.8e-14	53/169(31.36)	79	Transposon Ty3-G Gag-Pol polyprotein OS=Saccharomyces cerevisiae GN=TY3B-G PE=1 SV=3
CAFS_CC_T_00032022	5	GO:0001555: oocyte growth (biological_process); GO:0003723: RNA binding (molecular_function); GO:0008270: zinc ion binding (molecular_function); GO:0036099: female germ-line stem cell population maintenance (biological_process); GO:0043186: P granule (cellular_component);	--	--	[R]	General function prediction only	gi|1020509832|ref|XP_016093986.1|	1e-125	228/285(80.00)	455	PREDICTED: nanos homolog 1 [Sinocyclocheilus grahami]	XM_016515248.1	8e-160	225/266(84.59)	454	PREDICTED: Sinocyclocheilus rhinocerous nanos homolog 1 (LOC107710474), mRNA	sp|Q8WY41|NANO1_HUMAN	3.6e-22	44/65(67.69)	106	Nanos homolog 1 OS=Homo sapiens GN=NANOS1 PE=1 SV=2
CAFS_CC_T_00233280	--	--	--	--	--	--	gi|688601497|ref|XP_009292857.1|	4.1e-246	427/523(81.64)	856	PREDICTED: uncharacterized protein LOC553308 isoform X1 [Danio rerio]	XM_003197960.4	0	427/523(81.64)	864	PREDICTED: Danio rerio si:ch211-182e10.4 (si:ch211-182e10.4), mRNA	--	--	--	--	--
CAFS_CC_T_00233395	3	GO:0004930: G-protein coupled receptor activity (molecular_function); GO:0007186: G-protein coupled receptor signaling pathway (biological_process); GO:0016021: integral component of membrane (cellular_component);	K08385|OPN5	http://www.genome.jp/dbget-bin/www_bget?ko:K08385	[R]	General function prediction only	gi|1025165644|ref|XP_016356856.1|	1.9e-275	481/527(91.27)	954	PREDICTED: neuropeptide Y receptor type 2-like [Sinocyclocheilus anshuiensis]	XM_016501370.1	0	491/525(93.52)	810	PREDICTED: Sinocyclocheilus anshuiensis neuropeptide Y receptor type 2-like (LOC107699923), mRNA	sp|Q6U736|OPN5_HUMAN	1.7e-66	123/253(48.62)	255	Opsin-5 OS=Homo sapiens GN=OPN5 PE=1 SV=3
CAFS_CC_T_00000183	1	GO:0005887: integral component of plasma membrane (cellular_component);	--	--	[T]	Signal transduction mechanisms	gi|966646072|gb|KTF80984.1|	0	875/881(99.32)	1598	hypothetical protein cypCar_00014231 [Cyprinus carpio]	XM_016571560.1	0	856/876(97.72)	1602	PREDICTED: Sinocyclocheilus rhinocerous low-density lipoprotein receptor-related protein 12-like (LOC107754924), mRNA	sp|Q5R662|LRP12_PONAB	0	626/866(72.29)	1110	Low-density lipoprotein receptor-related protein 12 OS=Pongo abelii GN=LRP12 PE=2 SV=2
CAFS_CC_T_00054102	--	--	--	--	--	--	gi|1025002366|ref|XP_016320163.1|	0	1867/1941(96.19)	3658	PREDICTED: GREB1-like protein [Sinocyclocheilus anshuiensis]	XM_016464677.1	0	1879/1941(96.81)	3346	PREDICTED: Sinocyclocheilus anshuiensis GREB1-like protein (LOC107671732), mRNA	sp|Q9C091|GRB1L_HUMAN	0	1211/1994(60.73)	2279	GREB1-like protein OS=Homo sapiens GN=GREB1L PE=2 SV=2
CAFS_CC_T_00059204	3	GO:0004725: protein tyrosine phosphatase activity (molecular_function); GO:0006470: protein dephosphorylation (biological_process); GO:0016021: integral component of membrane (cellular_component);	K06776|PTPRK	http://www.genome.jp/dbget-bin/www_bget?ko:K06776	[T]	Signal transduction mechanisms	gi|1040674205|ref|XP_017208069.1|	0	942/1011(93.18)	1873	PREDICTED: receptor-type tyrosine-protein phosphatase kappa isoform X3 [Danio rerio]	XM_017352580.1	0	944/1011(93.37)	1835	PREDICTED: Danio rerio protein tyrosine phosphatase, receptor type, K (ptprk), transcript variant X3, mRNA	sp|P35822|PTPRK_MOUSE	0	824/995(82.81)	1667	Receptor-type tyrosine-protein phosphatase kappa OS=Mus musculus GN=Ptprk PE=1 SV=1
CAFS_CC_T_00058995	5	GO:0003677: DNA binding (molecular_function); GO:0003700: transcription factor activity, sequence-specific DNA binding (molecular_function); GO:0005634: nucleus (cellular_component); GO:0006355: regulation of transcription, DNA-templated (biological_process); GO:0007275: multicellular organism development (biological_process);	K09382|PAX1_9	http://www.genome.jp/dbget-bin/www_bget?ko:K09382	[K]	Transcription	gi|1024946562|ref|XP_016362344.1|	1.7e-179	318/344(92.44)	634	PREDICTED: paired box protein Pax-1-like [Sinocyclocheilus anshuiensis]	XM_016506858.1	0	318/344(92.44)	607	PREDICTED: Sinocyclocheilus anshuiensis paired box protein Pax-1-like (LOC107704025), mRNA	sp|P15863|PAX1_HUMAN	2.7e-118	223/346(64.45)	426	Paired box protein Pax-1 OS=Homo sapiens GN=PAX1 PE=2 SV=4
CAFS_CC_T_00064108	4	GO:0001075: transcription factor activity, RNA polymerase II core promoter sequence-specific binding involved in preinitiation complex assembly (molecular_function); GO:0005634: nucleus (cellular_component); GO:0005667: transcription factor complex (cellular_component); GO:0048839: inner ear development (biological_process);	--	--	[K]	Transcription	gi|966702822|gb|KTG35063.1|	1.7e-76	149/168(88.69)	291	hypothetical protein cypCar_00023348 [Cyprinus carpio]	XM_016537056.1	6e-96	150/169(88.76)	285	PREDICTED: Sinocyclocheilus rhinocerous dachshund homolog 2-like (LOC107727253), mRNA	sp|Q925Q8|DACH2_MOUSE	9.6e-56	129/171(75.44)	217	Dachshund homolog 2 OS=Mus musculus GN=Dach2 PE=1 SV=1
CAFS_CC_T_00063834	19	GO:0000152: nuclear ubiquitin ligase complex (cellular_component); GO:0000922: spindle pole (cellular_component); GO:0001525: angiogenesis (biological_process); GO:0004843: thiol-dependent ubiquitin-specific protease activity (molecular_function); GO:0005654: nucleoplasm (cellular_component); GO:0005737: cytoplasm (cellular_component); GO:0006302: double-strand break repair (biological_process); …	K11864|BRCC3	http://www.genome.jp/dbget-bin/www_bget?ko:K11864	[O]	Posttranslational modification, protein turnover, chaperones	gi|642122424|emb|CDQ63587.1|	5.3e-77	152/179(84.92)	293	unnamed protein product [Oncorhynchus mykiss]	BX929319.1	7e-99	145/179(81.01)	291	Gallus gallus finished cDNA, clone ChEST991c16	sp|B5X8M4|BRCC3_SALSA	1.3e-75	148/179(82.68)	283	Lys-63-specific deubiquitinase BRCC36 OS=Salmo salar GN=brcc3 PE=2 SV=1
CAFS_CC_T_00077164	2	GO:0021536: diencephalon development (biological_process); GO:0030901: midbrain development (biological_process);	K17494|CSRNP	http://www.genome.jp/dbget-bin/www_bget?ko:K17494	[R]	General function prediction only	gi|1025126583|ref|XP_016350806.1|	5.9e-230	466/513(90.84)	803	PREDICTED: cysteine/serine-rich nuclear protein 1-like [Sinocyclocheilus anshuiensis]	XM_016495322.1	0	517/585(88.38)	778	PREDICTED: Sinocyclocheilus anshuiensis cysteine/serine-rich nuclear protein 1-like (LOC107695421), transcript variant X3, mRNA	sp|Q5R638|CSRN1_PONAB	1.8e-77	226/480(47.08)	291	Cysteine/serine-rich nuclear protein 1 OS=Pongo abelii GN=CSRNP1 PE=2 SV=1
CAFS_CC_T_00075825	--	--	--	--	--	--	gi|1025363385|ref|XP_016395760.1|	5.5e-93	180/207(86.96)	346	PREDICTED: uncharacterized protein LOC107729640 [Sinocyclocheilus rhinocerous]	XM_016540274.1	1e-109	181/207(87.44)	320	PREDICTED: Sinocyclocheilus rhinocerous uncharacterized LOC107729640 (LOC107729640), mRNA	--	--	--	--	--
CAFS_CC_T_00075833	16	GO:0005004: GPI-linked ephrin receptor activity (molecular_function); GO:0005524: ATP binding (molecular_function); GO:0005769: early endosome (cellular_component); GO:0005887: integral component of plasma membrane (cellular_component); GO:0010717: regulation of epithelial to mesenchymal transition (biological_process); GO:0016477: cell migration (biological_process); GO:0018108: peptidyl-tyrosin…	K05105|EPHA4, SEK, TYRO1	http://www.genome.jp/dbget-bin/www_bget?ko:K05105	[T]	Signal transduction mechanisms	gi|1025218546|ref|XP_016430739.1|	0	943/989(95.35)	1927	PREDICTED: ephrin type-A receptor 3-like [Sinocyclocheilus rhinocerous]	XM_016575253.1	0	947/1004(94.32)	1907	PREDICTED: Sinocyclocheilus rhinocerous ephrin type-A receptor 3-like (LOC107757698), mRNA	sp|O13146|EPHA3_DANRE	0	913/989(92.32)	1856	Ephrin type-A receptor 3 OS=Danio rerio GN=epha3 PE=2 SV=1
CAFS_CC_T_00078567	4	GO:0004222: metalloendopeptidase activity (molecular_function); GO:0005578: proteinaceous extracellular matrix (cellular_component); GO:0006508: proteolysis (biological_process); GO:0008270: zinc ion binding (molecular_function);	K09609|ADAMTS20	http://www.genome.jp/dbget-bin/www_bget?ko:K09609	[O]	Posttranslational modification, protein turnover, chaperones	gi|1025382169|ref|XP_016400809.1|	0	1303/1404(92.81)	2792	PREDICTED: A disintegrin and metalloproteinase with thrombospondin motifs 20-like [Sinocyclocheilus rhinocerous]	XM_016545323.1	0	1303/1404(92.81)	2671	PREDICTED: Sinocyclocheilus rhinocerous A disintegrin and metalloproteinase with thrombospondin motifs 20-like (LOC107733613), mRNA	sp|P59511|ATS20_MOUSE	0	928/1538(60.34)	2021	A disintegrin and metalloproteinase with thrombospondin motifs 20 OS=Mus musculus GN=Adamts20 PE=2 SV=1
CAFS_CC_T_00086597	5	GO:0001525: angiogenesis (biological_process); GO:0004721: phosphoprotein phosphatase activity (molecular_function); GO:0006470: protein dephosphorylation (biological_process); GO:0046872: metal ion binding (molecular_function); GO:0060026: convergent extension (biological_process);	K06269|PPP1C	http://www.genome.jp/dbget-bin/www_bget?ko:K06269	[TR]	--	gi|47551331|ref|NP_999976.1|	5e-197	329/330(99.70)	693	protein phosphatase 1, catalytic subunit, alpha [Danio rerio]	XM_016544285.1	0	329/330(99.70)	662	PREDICTED: Sinocyclocheilus rhinocerous serine/threonine-protein phosphatase alpha-2 isoform-like (LOC107732870), mRNA	sp|Q3T0E7|PP1A_BOVIN	2.6e-182	299/330(90.61)	639	Serine/threonine-protein phosphatase PP1-alpha catalytic subunit OS=Bos taurus GN=PPP1CA PE=2 SV=1
CAFS_CC_T_00089118	3	GO:0004930: G-protein coupled receptor activity (molecular_function); GO:0007186: G-protein coupled receptor signaling pathway (biological_process); GO:0016021: integral component of membrane (cellular_component);	K04243|GPR37	http://www.genome.jp/dbget-bin/www_bget?ko:K04243	[R]	General function prediction only	gi|1024957597|ref|XP_016299736.1|	0	596/614(97.07)	1125	PREDICTED: prosaposin receptor GPR37-like [Sinocyclocheilus anshuiensis]	XM_016444250.1	0	596/614(97.07)	1053	PREDICTED: Sinocyclocheilus anshuiensis prosaposin receptor GPR37-like (LOC107656396), mRNA	sp|O15354|GPR37_HUMAN	2.3e-139	264/369(71.54)	497	Probable G-protein coupled receptor 37 OS=Homo sapiens GN=GPR37 PE=1 SV=2
CAFS_CC_T_00089304	--	--	--	--	--	--	gi|1024957501|ref|XP_016299683.1|	9.4e-178	474/656(72.26)	629	PREDICTED: pleckstrin homology domain-containing family A member 5-like isoform X1 [Sinocyclocheilus anshuiensis]	XM_016444203.1	0	480/650(73.85)	902	PREDICTED: Sinocyclocheilus anshuiensis pleckstrin homology domain-containing family A member 5-like (LOC107656381), transcript variant X7, mRNA	sp|Q9HAU0|PKHA5_HUMAN	8e-97	228/514(44.36)	355	Pleckstrin homology domain-containing family A member 5 OS=Homo sapiens GN=PLEKHA5 PE=1 SV=1
CAFS_CC_T_00105849	--	--	--	--	--	--	--	--	--	--	--	LN590711.1	7e-101	160/160(100.00)	326	Cyprinus carpio genome assembly common carp genome, scaffold: LG40, chromosome: 40	--	--	--	--	--
CAFS_CC_T_00117685	--	--	--	--	--	--	gi|966641652|gb|KTF76566.1|	0	840/958(87.68)	1555	hypothetical protein cypCar_00037216, partial [Cyprinus carpio]	XM_016559752.1	0	735/819(89.74)	1387	PREDICTED: Sinocyclocheilus rhinocerous ligand-dependent nuclear receptor-interacting factor 1-like (LOC107745772), mRNA	sp|Q5T3J3|CA103_HUMAN	2.5e-30	128/406(31.53)	135	Uncharacterized protein C1orf103 OS=Homo sapiens GN=C1orf103 PE=1 SV=1
CAFS_CC_T_00116165	--	--	K17478|FKBP15, WAFL	http://www.genome.jp/dbget-bin/www_bget?ko:K17478	[S]	Function unknown	gi|1025046439|ref|XP_016329132.1|	1.2e-107	483/656(73.63)	397	PREDICTED: LOW QUALITY PROTEIN: FK506-binding protein 15-like [Sinocyclocheilus anshuiensis]	XM_016473646.1	0	558/689(80.99)	700	PREDICTED: Sinocyclocheilus anshuiensis FK506-binding protein 15-like (LOC107678408), mRNA	sp|Q5T1M5|FKB15_HUMAN	1.1e-12	50/151(33.11)	76	FK506-binding protein 15 OS=Homo sapiens GN=FKBP15 PE=1 SV=2
CAFS_CC_T_00116312	3	GO:0005525: GTP binding (molecular_function); GO:0005622: intracellular (cellular_component); GO:0007264: small GTPase mediated signal transduction (biological_process);	K07868|RHOBTB1_2	http://www.genome.jp/dbget-bin/www_bget?ko:K07868	[R]	General function prediction only	gi|1020503813|ref|XP_016090783.1|	0	682/712(95.79)	1372	PREDICTED: rho-related BTB domain-containing protein 2-like isoform X2 [Sinocyclocheilus grahami]	XM_016235297.1	0	680/709(95.91)	1253	PREDICTED: Sinocyclocheilus grahami rho-related BTB domain-containing protein 2-like (LOC107553166), transcript variant X2, mRNA	sp|Q9BYZ6|RHBT2_HUMAN	1.1e-302	539/706(76.35)	1040	Rho-related BTB domain-containing protein 2 OS=Homo sapiens GN=RHOBTB2 PE=2 SV=2
CAFS_CC_T_00121619	9	GO:0003707: steroid hormone receptor activity (molecular_function); GO:0004879: RNA polymerase II transcription factor activity, ligand-activated sequence-specific DNA binding (molecular_function); GO:0005634: nucleus (cellular_component); GO:0006355: regulation of transcription, DNA-templated (biological_process); GO:0006366: transcription from RNA polymerase II promoter (biological_process); GO…	K08540|NR1I2, PXR	http://www.genome.jp/dbget-bin/www_bget?ko:K08540	[T]	Signal transduction mechanisms	gi|966646324|gb|KTF81236.1|	1.8e-244	426/427(99.77)	850	hypothetical protein cypCar_00031874 [Cyprinus carpio]	XM_016529658.1	0	399/429(93.01)	760	PREDICTED: Sinocyclocheilus rhinocerous nuclear receptor subfamily 1 group I member 2-like (LOC107721572), mRNA	sp|Q8SQ01|NR1I2_MACMU	9.1e-103	203/401(50.62)	375	Nuclear receptor subfamily 1 group I member 2 OS=Macaca mulatta GN=NR1I2 PE=2 SV=1
CAFS_CC_T_00120613	12	GO:0005391: sodium:potassium-exchanging ATPase activity (molecular_function); GO:0005524: ATP binding (molecular_function); GO:0005887: integral component of plasma membrane (cellular_component); GO:0006883: cellular sodium ion homeostasis (biological_process); GO:0010107: potassium ion import (biological_process); GO:0010248: establishment or maintenance of transmembrane electrochemical gradient…	K01539|ATP1A	http://www.genome.jp/dbget-bin/www_bget?ko:K01539	[P]	Inorganic ion transport and metabolism	gi|1024958497|ref|XP_016300217.1|	0	1010/1021(98.92)	1971	PREDICTED: sodium/potassium-transporting ATPase subunit alpha-1 [Sinocyclocheilus anshuiensis]	XM_016444731.1	0	1013/1021(99.22)	1967	PREDICTED: Sinocyclocheilus anshuiensis sodium/potassium-transporting ATPase subunit alpha-1 (LOC107656784), mRNA	sp|P25489|AT1A1_CATCO	0	959/1023(93.74)	1865	Sodium/potassium-transporting ATPase subunit alpha-1 OS=Catostomus commersonii GN=atp1a1 PE=2 SV=1
CAFS_CC_T_00123957	--	--	--	--	[TZ]	--	gi|1025285821|ref|XP_016378586.1|	5.2e-130	330/393(83.97)	470	PREDICTED: rho GTPase-activating protein 6-like isoform X1 [Sinocyclocheilus rhinocerous]	XM_016475678.1	0	368/390(94.36)	546	PREDICTED: Sinocyclocheilus anshuiensis rho GTPase-activating protein 6-like (LOC107679946), transcript variant X3, mRNA	sp|O54834|RHG06_MOUSE	3.3e-60	201/429(46.85)	233	Rho GTPase-activating protein 6 OS=Mus musculus GN=Arhgap6 PE=1 SV=3
CAFS_CC_T_00126553	--	--	--	--	--	--	gi|1025153456|ref|XP_016416987.1|	1.7e-249	446/635(70.24)	868	PREDICTED: deoxynucleoside triphosphate triphosphohydrolase SAMHD1-like [Sinocyclocheilus rhinocerous]	XM_016561501.1	0	448/635(70.55)	853	PREDICTED: Sinocyclocheilus rhinocerous deoxynucleoside triphosphate triphosphohydrolase SAMHD1-like (LOC107747076), mRNA	sp|Q502K2|SAMH1_DANRE	3.6e-63	146/357(40.90)	244	SAM domain and HD domain-containing protein 1 OS=Danio rerio GN=samhd1 PE=2 SV=2
CAFS_CC_T_00126663	1	GO:0005524: ATP binding (molecular_function);	--	--	--	--	gi|528469801|ref|XP_005171099.1|	0	741/955(77.59)	1293	PREDICTED: protein NLRC3 [Danio rerio]	XM_017356855.1	0	716/940(76.17)	1333	PREDICTED: Danio rerio protein NLRC3-like (LOC101884104), transcript variant X2, mRNA	sp|Q5DU56|NLRC3_MOUSE	4.9e-48	146/507(28.80)	194	Protein NLRC3 OS=Mus musculus GN=Nlrc3 PE=2 SV=2
CAFS_CC_T_00199760	7	GO:0004970: ionotropic glutamate receptor activity (molecular_function); GO:0005234: extracellular-glutamate-gated ion channel activity (molecular_function); GO:0016021: integral component of membrane (cellular_component); GO:0030054: cell junction (cellular_component); GO:0034220: ion transmembrane transport (biological_process); GO:0035235: ionotropic glutamate receptor signaling pathway (biolo…	K05213|GRIN3A	http://www.genome.jp/dbget-bin/www_bget?ko:K05213	[PET]	--	gi|1025254609|ref|XP_016370168.1|	0	1037/1095(94.70)	2091	PREDICTED: glutamate receptor ionotropic, NMDA 3A-like [Sinocyclocheilus rhinocerous]	XM_016514682.1	0	1058/1118(94.63)	2114	PREDICTED: Sinocyclocheilus rhinocerous glutamate receptor ionotropic, NMDA 3A-like (LOC107710005), mRNA	sp|Q8TCU5|NMD3A_HUMAN	0	701/1097(63.90)	1404	Glutamate [NMDA] receptor subunit 3A OS=Homo sapiens GN=GRIN3A PE=1 SV=2
CAFS_CC_T_00131507	14	GO:0000082: G1/S transition of mitotic cell cycle (biological_process); GO:0000785: chromatin (cellular_component); GO:0004674: protein serine/threonine kinase activity (molecular_function); GO:0004871: signal transducer activity (molecular_function); GO:0005524: ATP binding (molecular_function); GO:0005814: centriole (cellular_component); GO:0006468: protein phosphorylation (biological_process);…	K08861|PLK2	http://www.genome.jp/dbget-bin/www_bget?ko:K08861	[D]	Cell cycle control, cell division, chromosome partitioning	gi|966662729|gb|KTF97042.1|	0	617/619(99.68)	1258	hypothetical protein cypCar_00024696 [Cyprinus carpio]	XM_016440265.1	0	606/619(97.90)	1137	PREDICTED: Sinocyclocheilus anshuiensis serine/threonine-protein kinase PLK2-like (LOC107653495), mRNA	sp|Q9NYY3|PLK2_HUMAN	2.6e-303	501/620(80.81)	1042	Serine/threonine-protein kinase PLK2 OS=Homo sapiens GN=PLK2 PE=1 SV=3
CAFS_CC_T_00136497	7	GO:0000226: microtubule cytoskeleton organization (biological_process); GO:0006357: regulation of transcription from RNA polymerase II promoter (biological_process); GO:0021702: cerebellar Purkinje cell differentiation (biological_process); GO:0021707: cerebellar granule cell differentiation (biological_process); GO:0030914: STAGA complex (cellular_component); GO:0043009: chordate embryonic devel…	K11318|ATXN7, SCA7	http://www.genome.jp/dbget-bin/www_bget?ko:K11318	--	--	gi|1025349242|ref|XP_016394362.1|	0	746/808(92.33)	1165	PREDICTED: ataxin-7-like [Sinocyclocheilus rhinocerous]	XM_016538876.1	0	785/838(93.68)	1083	PREDICTED: Sinocyclocheilus rhinocerous ataxin-7-like (LOC107728624), transcript variant X1, mRNA	sp|O15265|ATX7_HUMAN	7.7e-117	354/779(45.44)	422	Ataxin-7 OS=Homo sapiens GN=ATXN7 PE=1 SV=1
CAFS_CC_T_00134507	1	GO:0008270: zinc ion binding (molecular_function);	K04511|PRICKLE	http://www.genome.jp/dbget-bin/www_bget?ko:K04511	[TZR]	--	gi|966709872|gb|KTG42110.1|	0	814/874(93.14)	1558	hypothetical protein cypCar_00004863 [Cyprinus carpio]	XM_016538888.1	0	822/867(94.81)	1517	PREDICTED: Sinocyclocheilus rhinocerous prickle-like protein 2 (LOC107728631), transcript variant X5, mRNA	sp|Q7Z3G6|PRIC2_HUMAN	3.5e-287	552/861(64.11)	988	Prickle-like protein 2 OS=Homo sapiens GN=PRICKLE2 PE=1 SV=2
CAFS_CC_T_00140800	11	GO:0005737: cytoplasm (cellular_component); GO:0007015: actin filament organization (biological_process); GO:0008157: protein phosphatase 1 binding (molecular_function); GO:0014069: postsynaptic density (cellular_component); GO:0015629: actin cytoskeleton (cellular_component); GO:0019722: calcium-mediated signaling (biological_process); GO:0030425: dendrite (cellular_component); GO:0031175: neuro…	K17551|PPP1R9	http://www.genome.jp/dbget-bin/www_bget?ko:K17551	[T]	Signal transduction mechanisms	gi|1025068641|ref|XP_016336613.1|	0	771/823(93.68)	1331	PREDICTED: neurabin-2-like [Sinocyclocheilus anshuiensis]	XM_016554478.1	0	776/823(94.29)	1404	PREDICTED: Sinocyclocheilus rhinocerous neurabin-2-like (LOC107741705), mRNA	sp|Q96SB3|NEB2_HUMAN	5.2e-168	419/849(49.35)	592	Neurabin-2 OS=Homo sapiens GN=PPP1R9B PE=1 SV=2
CAFS_CC_T_00142683	8	GO:0004022: alcohol dehydrogenase (NAD) activity (molecular_function); GO:0006067: ethanol metabolic process (biological_process); GO:0006070: octanol metabolic process (biological_process); GO:0008270: zinc ion binding (molecular_function); GO:0018467: formaldehyde dehydrogenase activity (molecular_function); GO:0046292: formaldehyde metabolic process (biological_process); GO:0055114: oxidation-…	K00121|frmA, ADH5, adhC	http://www.genome.jp/dbget-bin/www_bget?ko:K00121	[Q]	Secondary metabolites biosynthesis, transport and catabolism	gi|1024983039|ref|XP_016313248.1|	8.4e-181	306/326(93.87)	639	PREDICTED: alcohol dehydrogenase 1-like [Sinocyclocheilus anshuiensis]	XM_016562151.1	0	305/326(93.56)	597	PREDICTED: Sinocyclocheilus rhinocerous alcohol dehydrogenase 1-like (LOC107747567), mRNA	sp|P26325|ADH1_GADCA	4.2e-132	222/325(68.31)	472	Alcohol dehydrogenase 1 OS=Gadus callarias PE=1 SV=1
CAFS_CC_T_00144800	8	GO:0004890: GABA-A receptor activity (molecular_function); GO:0005230: extracellular ligand-gated ion channel activity (molecular_function); GO:0005886: plasma membrane (cellular_component); GO:0007165: signal transduction (biological_process); GO:0016021: integral component of membrane (cellular_component); GO:0030054: cell junction (cellular_component); GO:0034220: ion transmembrane transport (…	K05181|GABRB	http://www.genome.jp/dbget-bin/www_bget?ko:K05181	[T]	Signal transduction mechanisms	gi|1024983308|ref|XP_016313392.1|	5.3e-272	474/484(97.93)	942	PREDICTED: gamma-aminobutyric acid receptor subunit beta-1-like [Sinocyclocheilus anshuiensis]	XM_016562133.1	0	474/484(97.93)	923	PREDICTED: Sinocyclocheilus rhinocerous gamma-aminobutyric acid receptor subunit beta-1-like (LOC107747557), mRNA	sp|P08220|GBRB1_BOVIN	7.6e-215	379/473(80.13)	747	Gamma-aminobutyric acid receptor subunit beta-1 OS=Bos taurus GN=GABRB1 PE=2 SV=1
CAFS_CC_T_00145925	3	GO:0000166: nucleotide binding (molecular_function); GO:0003723: RNA binding (molecular_function); GO:0046872: metal ion binding (molecular_function);	--	--	[O]	Posttranslational modification, protein turnover, chaperones	gi|1025154619|ref|XP_016417208.1|	4.6e-234	482/511(94.32)	816	PREDICTED: uncharacterized protein LOC107747265 isoform X1 [Sinocyclocheilus rhinocerous]	XM_016561722.1	0	481/511(94.13)	836	PREDICTED: Sinocyclocheilus rhinocerous uncharacterized LOC107747265 (LOC107747265), transcript variant X1, mRNA	sp|Q49AM3|TTC31_HUMAN	1.3e-18	67/206(32.52)	95	Tetratricopeptide repeat protein 31 OS=Homo sapiens GN=TTC31 PE=2 SV=3
CAFS_CC_T_00150113	--	--	K04622|GPRC6A	http://www.genome.jp/dbget-bin/www_bget?ko:K04622	--	--	gi|908482150|ref|XP_013124995.1|	4.7e-14	48/109(44.04)	83	PREDICTED: RNA-directed DNA polymerase from mobile element jockey-like [Oreochromis niloticus]	LN590712.1	3e-66	111/112(99.11)	225	Cyprinus carpio genome assembly common carp genome, scaffold: LG2, chromosome: 2	--	--	--	--	--
CAFS_CC_T_00155549	--	--	--	--	--	--	gi|966637507|gb|KTF72611.1|	3.8e-86	156/158(98.73)	323	hypothetical protein cypCar_00046162 [Cyprinus carpio]	XM_016287571.1	1e-94	134/158(84.81)	280	PREDICTED: Sinocyclocheilus grahami zymogen granule membrane protein 16-like (LOC107596767), mRNA	sp|O60844|ZG16_HUMAN	1.8e-19	60/138(43.48)	97	Zymogen granule membrane protein 16 OS=Homo sapiens GN=ZG16 PE=1 SV=1
CAFS_CC_T_00168141
CAFS_CC_T_00167043	18	GO:0003007: heart morphogenesis (biological_process); GO:0004714: transmembrane receptor protein tyrosine kinase activity (molecular_function); GO:0005520: insulin-like growth factor binding (molecular_function); GO:0005524: ATP binding (molecular_function); GO:0009952: anterior/posterior pattern specification (biological_process); GO:0016021: integral component of membrane (cellular_component); …	K05087|IGF1R	http://www.genome.jp/dbget-bin/www_bget?ko:K05087	[T]	Signal transduction mechanisms	gi|33355376|gb|AAN52151.1|	1.6e-127	216/219(98.63)	461	IGF-I receptor subtype a [Cyprinus carpio]	XM_016494679.1	4e-155	215/219(98.17)	448	PREDICTED: Sinocyclocheilus anshuiensis insulin-like growth factor 1 receptor (LOC107694952), mRNA	sp|P08069|IGF1R_HUMAN	1e-81	141/219(64.38)	304	Insulin-like growth factor 1 receptor OS=Homo sapiens GN=IGF1R PE=1 SV=1
CAFS_CC_T_00170823	7	GO:0005385: zinc ion transmembrane transporter activity (molecular_function); GO:0005789: endoplasmic reticulum membrane (cellular_component); GO:0005794: Golgi apparatus (cellular_component); GO:0006829: zinc II ion transport (biological_process); GO:0016021: integral component of membrane (cellular_component); GO:0055069: zinc ion homeostasis (biological_process); GO:0055085: transmembrane tran…	K14713|SLC39A7, KE4, ZIP7	http://www.genome.jp/dbget-bin/www_bget?ko:K14713	[P]	Inorganic ion transport and metabolism	gi|1025114329|ref|XP_016348769.1|	1.8e-135	358/388(92.27)	488	PREDICTED: zinc transporter Slc39a7-like isoform X3 [Sinocyclocheilus anshuiensis]	XM_016493283.1	1e-164	337/391(86.19)	486	PREDICTED: Sinocyclocheilus anshuiensis zinc transporter Slc39a7-like (LOC107693768), transcript variant X3, mRNA	sp|Q31125|S39A7_MOUSE	1.2e-83	218/342(63.74)	311	Zinc transporter SLC39A7 OS=Mus musculus GN=Slc39a7 PE=1 SV=2
CAFS_CC_T_00177667	--	--	--	--	--	--	gi|966660563|gb|KTF95417.1|	6.5e-88	162/162(100.00)	330	hypothetical protein cypCar_00001016 [Cyprinus carpio]	XM_016445480.1	2e-101	181/331(54.68)	311	PREDICTED: Sinocyclocheilus anshuiensis uncharacterized LOC107657426 (LOC107657426), mRNA	--	--	--	--	--
CAFS_CC_T_00179593	--	--	--	--	--	--	--	--	--	--	--	LN590711.1	3e-39	86/86(100.00)	147	Cyprinus carpio genome assembly common carp genome, scaffold: LG40, chromosome: 40	--	--	--	--	--
CAFS_CC_T_00189763	2	GO:0004252: serine-type endopeptidase activity (molecular_function); GO:0006508: proteolysis (biological_process);	K01353|GZMB	http://www.genome.jp/dbget-bin/www_bget?ko:K01353	[E]	Amino acid transport and metabolism	gi|966708854|gb|KTG41092.1|	2.2e-139	252/281(89.68)	501	hypothetical protein cypCar_00033440 [Cyprinus carpio]	XM_016538811.1	1e-144	212/236(89.83)	414	PREDICTED: Sinocyclocheilus rhinocerous mast cell protease 4-like (LOC107728585), mRNA	sp|P51779|CFAD_PIG	1.2e-36	86/251(34.26)	154	Complement factor D OS=Sus scrofa GN=CFD PE=2 SV=1
CAFS_CC_T_00192586	2	GO:0000166: nucleotide binding (molecular_function); GO:0003676: nucleic acid binding (molecular_function);	K13207|CUGBP, BRUNOL, CELF	http://www.genome.jp/dbget-bin/www_bget?ko:K13207	[A]	RNA processing and modification	gi|1040677198|ref|XP_017208668.1|	1.3e-80	145/148(97.97)	305	PREDICTED: CUGBP Elav-like family member 5 isoform X12 [Danio rerio]	XM_016287753.1	2e-102	144/148(97.30)	299	PREDICTED: Sinocyclocheilus grahami CUGBP Elav-like family member 5 (LOC107596896), mRNA	sp|A0JM51|CELF5_XENTR	3.9e-37	75/93(80.65)	155	CUGBP Elav-like family member 5 OS=Xenopus tropicalis GN=celf5 PE=2 SV=1
CAFS_CC_T_00189996	8	GO:0007186: G-protein coupled receptor signaling pathway (biological_process); GO:0016021: integral component of membrane (cellular_component); GO:0030218: erythrocyte differentiation (biological_process); GO:0050848: regulation of calcium-mediated signaling (biological_process); GO:0060271: cilium assembly (biological_process); GO:0061371: determination of heart left/right asymmetry (biological_…	K04294|LPAR3, EDG7	http://www.genome.jp/dbget-bin/www_bget?ko:K04294	[R]	General function prediction only	gi|642125643|emb|CDQ61389.1|	9.8e-176	338/555(60.90)	623	unnamed protein product [Oncorhynchus mykiss]	XM_016250096.1	0	309/334(92.51)	630	PREDICTED: Sinocyclocheilus grahami lysophosphatidic acid receptor 3-like (LOC107564924), transcript variant X1, mRNA	sp|Q9UBY5|LPAR3_HUMAN	2.9e-103	195/321(60.75)	377	Lysophosphatidic acid receptor 3 OS=Homo sapiens GN=LPAR3 PE=2 SV=1
CAFS_CC_T_00197970	--	--	--	--	--	--	gi|1020564660|ref|XP_016112406.1|	1.5e-219	436/545(80.00)	768	PREDICTED: tripartite motif-containing protein 16-like [Sinocyclocheilus grahami]	XM_016256920.1	0	459/546(84.07)	853	PREDICTED: Sinocyclocheilus grahami tripartite motif-containing protein 16-like (LOC107570665), mRNA	sp|O95361|TRI16_HUMAN	3.4e-38	137/477(28.72)	161	Tripartite motif-containing protein 16 OS=Homo sapiens GN=TRIM16 PE=1 SV=3
CAFS_CC_T_00198176	3	GO:0005086: ARF guanyl-nucleotide exchange factor activity (molecular_function); GO:0005802: trans-Golgi network (cellular_component); GO:0016192: vesicle-mediated transport (biological_process);	K07365|NCK	http://www.genome.jp/dbget-bin/www_bget?ko:K07365	[T]	Signal transduction mechanisms	gi|1025385845|ref|XP_016401807.1|	8.5e-217	375/381(98.43)	758	PREDICTED: cytoplasmic protein NCK1-like isoform X1 [Sinocyclocheilus rhinocerous]	XM_016546321.1	0	377/383(98.43)	780	PREDICTED: Sinocyclocheilus rhinocerous cytoplasmic protein NCK1-like (LOC107734380), transcript variant X1, mRNA	sp|P16333|NCK1_HUMAN	3.1e-171	293/379(77.31)	602	Cytoplasmic protein NCK1 OS=Homo sapiens GN=NCK1 PE=1 SV=1
CAFS_CC_T_00201640	7	GO:0001756: somitogenesis (biological_process); GO:0001841: neural tube formation (biological_process); GO:0004872: receptor activity (molecular_function); GO:0005887: integral component of plasma membrane (cellular_component); GO:0007411: axon guidance (biological_process); GO:0030513: positive regulation of BMP signaling pathway (biological_process); GO:0055072: iron ion homeostasis (biological…	K06766|NEO1	http://www.genome.jp/dbget-bin/www_bget?ko:K06766	[T]	Signal transduction mechanisms	gi|1020495248|ref|XP_016086210.1|	0	1326/1408(94.18)	2491	PREDICTED: neogenin-like [Sinocyclocheilus grahami]	XM_016230724.1	0	1327/1414(93.85)	2504	PREDICTED: Sinocyclocheilus grahami neogenin-like (LOC107549579), mRNA	sp|P97798|NEO1_MOUSE	0	930/1451(64.09)	1694	Neogenin OS=Mus musculus GN=Neo1 PE=1 SV=1
CAFS_CC_T_00211818	7	GO:0005634: nucleus (cellular_component); GO:0005814: centriole (cellular_component); GO:0010826: negative regulation of centrosome duplication (biological_process); GO:0016567: protein ubiquitination (biological_process); GO:0019005: SCF ubiquitin ligase complex (cellular_component); GO:0031146: SCF-dependent proteasomal ubiquitin-dependent protein catabolic process (biological_process); GO:0051…	K10289|CCNF, FBXO1	http://www.genome.jp/dbget-bin/www_bget?ko:K10289	--	--	gi|1025135260|ref|XP_016410545.1|	0	711/784(90.69)	1401	PREDICTED: cyclin-F [Sinocyclocheilus rhinocerous]	XM_016495660.1	0	721/784(91.96)	1333	PREDICTED: Sinocyclocheilus anshuiensis cyclin F (ccnf), mRNA	sp|Q6NYX6|CCNF_DANRE	0	605/763(79.29)	1202	Cyclin-F OS=Danio rerio GN=ccnf PE=2 SV=1
CAFS_CC_T_00206267	2	GO:0008152: metabolic process (biological_process); GO:0016740: transferase activity (molecular_function);	K01197|hya	http://www.genome.jp/dbget-bin/www_bget?ko:K01197	--	--	gi|939287956|ref|XP_014264862.1|	2.4e-79	157/204(76.96)	301	PREDICTED: uncharacterized protein LOC101481781 [Maylandia zebra]	LN590694.1	6e-132	204/204(100.00)	419	Cyprinus carpio genome assembly common carp genome, scaffold: LG43, chromosome: 43	--	--	--	--	--
CAFS_CC_T_00217928	36	GO:0000026: alpha-1,2-mannosyltransferase activity (molecular_function); GO:0000033: alpha-1,3-mannosyltransferase activity (molecular_function); GO:0000139: Golgi membrane (cellular_component); GO:0001962: alpha-1,3-galactosyltransferase activity (molecular_function); GO:0003980: UDP-glucose:glycoprotein glucosyltransferase activity (molecular_function); GO:0004376: glycolipid mannosyltransferas…	K00710|GALNT	http://www.genome.jp/dbget-bin/www_bget?ko:K00710	[O]	Posttranslational modification, protein turnover, chaperones	gi|1020414177|ref|XP_016125878.1|	0	558/594(93.94)	1161	PREDICTED: probable polypeptide N-acetylgalactosaminyltransferase 8 [Sinocyclocheilus grahami]	XM_016270392.1	0	558/595(93.78)	1130	PREDICTED: Sinocyclocheilus grahami probable polypeptide N-acetylgalactosaminyltransferase 8 (LOC107583996), mRNA	sp|Q9NY28|GALT8_HUMAN	4.1e-178	301/575(52.35)	625	Probable polypeptide N-acetylgalactosaminyltransferase 8 OS=Homo sapiens GN=GALNT8 PE=2 SV=1
CAFS_CC_T_00219104	4	GO:0005086: ARF guanyl-nucleotide exchange factor activity (molecular_function); GO:0030036: actin cytoskeleton organization (biological_process); GO:0032012: regulation of ARF protein signal transduction (biological_process); GO:0043547: positive regulation of GTPase activity (biological_process);	K12495|IQSEC	http://www.genome.jp/dbget-bin/www_bget?ko:K12495	[U]	Intracellular trafficking, secretion, and vesicular transport	gi|1025093041|ref|XP_016343321.1|	1.2e-281	489/508(96.26)	974	PREDICTED: IQ motif and SEC7 domain-containing protein 3-like isoform X1 [Sinocyclocheilus anshuiensis]	XM_016487168.1	0	522/539(96.85)	1006	PREDICTED: Sinocyclocheilus anshuiensis IQ motif and SEC7 domain-containing protein 3-like (LOC107689235), transcript variant X1, mRNA	sp|Q9UPP2|IQEC3_HUMAN	2.9e-216	387/500(77.40)	752	IQ motif and SEC7 domain-containing protein 3 OS=Homo sapiens GN=IQSEC3 PE=2 SV=3
CAFS_CC_T_00217003	--	--	--	--	--	--	--	--	--	--	--	LN592930.1	5e-72	124/153(81.05)	242	Cyprinus carpio genome assembly common carp genome ,scaffold 000028889	--	--	--	--	--
CAFS_CC_T_00222339	6	GO:0001525: angiogenesis (biological_process); GO:0001889: liver development (biological_process); GO:0007154: cell communication (biological_process); GO:0016021: integral component of membrane (cellular_component); GO:0048884: neuromast development (biological_process); GO:0048916: posterior lateral line development (biological_process);	--	--	[GO]	--	gi|1020522569|ref|XP_016100760.1|	2.1e-201	341/356(95.79)	707	PREDICTED: kremen protein 1-like isoform X1 [Sinocyclocheilus grahami]	XM_016444756.1	0	342/356(96.07)	642	PREDICTED: Sinocyclocheilus anshuiensis kremen protein 1-like (LOC107656811), transcript variant X1, mRNA	sp|Q90Y90|KREM1_XENLA	4e-112	206/357(57.70)	406	Kremen protein 1 OS=Xenopus laevis GN=kremen1 PE=2 SV=1
CAFS_CC_T_00220253	9	GO:0003779: actin binding (molecular_function); GO:0005737: cytoplasm (cellular_component); GO:0007399: nervous system development (biological_process); GO:0010499: proteasomal ubiquitin-independent protein catabolic process (biological_process); GO:0016567: protein ubiquitination (biological_process); GO:0017148: negative regulation of translation (biological_process); GO:0031463: Cul3-RING ubiq…	K10462|KLHL25_37, ENC1, ENC2	http://www.genome.jp/dbget-bin/www_bget?ko:K10462	[TR]	--	gi|326667818|ref|XP_687500.2|	0	565/576(98.09)	1146	PREDICTED: ectoderm-neural cortex protein 1 [Danio rerio]	XM_682408.5	0	587/624(94.07)	1210	PREDICTED: Danio rerio ectodermal-neural cortex 1 (enc1), mRNA	sp|O35709|ENC1_MOUSE	1.7e-304	505/576(87.67)	1045	Ectoderm-neural cortex protein 1 OS=Mus musculus GN=Enc1 PE=2 SV=1
CAFS_CC_T_00221212	5	GO:0000226: microtubule cytoskeleton organization (biological_process); GO:0005815: microtubule organizing center (cellular_component); GO:0030036: actin cytoskeleton organization (biological_process); GO:0031941: filamentous actin (cellular_component); GO:0060325: face morphogenesis (biological_process);	--	--	[R]	General function prediction only	gi|1025264434|ref|XP_016372801.1|	3.9e-198	643/841(76.46)	698	PREDICTED: cytospin-B-like isoform X2 [Sinocyclocheilus rhinocerous]	XM_016517315.1	0	789/841(93.82)	1397	PREDICTED: Sinocyclocheilus rhinocerous cytospin-B-like (LOC107712164), transcript variant X2, mRNA	sp|Q5M775|CYTSB_HUMAN	5.2e-46	311/899(34.59)	187	Cytospin-B OS=Homo sapiens GN=CYTSB PE=1 SV=1
CAFS_CC_T_00231685	7	GO:0001947: heart looping (biological_process); GO:0003305: cell migration involved in heart jogging (biological_process); GO:0003314: heart rudiment morphogenesis (biological_process); GO:0005930: axoneme (cellular_component); GO:0035082: axoneme assembly (biological_process); GO:0048793: pronephros development (biological_process); GO:0060027: convergent extension involved in gastrulation (biol…	--	--	--	--	gi|966641540|gb|KTF76454.1|	2.5e-152	464/487(95.28)	545	hypothetical protein cypCar_00015459 [Cyprinus carpio]	XM_016273224.1	0	449/478(93.93)	887	PREDICTED: Sinocyclocheilus grahami dynein assembly factor 1, axonemal-like (LOC107586010), mRNA	sp|Q7ZV84|LRC50_DANRE	5.5e-80	351/480(73.12)	299	Leucine-rich repeat-containing protein 50 OS=Danio rerio GN=lrrc50 PE=2 SV=2
CAFS_CC_T_00232156	--	--	K11492|NCAPG2, LUZP5	http://www.genome.jp/dbget-bin/www_bget?ko:K11492	[S]	Function unknown	gi|966663894|gb|KTF97987.1|	0	1109/1141(97.20)	2154	hypothetical protein cypCar_00019003 [Cyprinus carpio]	XM_016279985.1	0	1103/1141(96.67)	2159	PREDICTED: Sinocyclocheilus grahami non-SMC condensin II complex subunit G2 (ncapg2), mRNA	sp|Q2TAW0|CNDG2_XENLA	3.4e-306	556/1156(48.10)	1052	Condensin-2 complex subunit G2 OS=Xenopus laevis GN=ncapg2 PE=1 SV=1
CAFS_CC_T_00240708	6	GO:0005507: copper ion binding (molecular_function); GO:0007517: muscle organ development (biological_process); GO:0016641: oxidoreductase activity, acting on the CH-NH2 group of donors, oxygen as acceptor (molecular_function); GO:0022008: neurogenesis (biological_process); GO:0051216: cartilage development (biological_process); GO:0055114: oxidation-reduction process (biological_process);	K00277|LOX	http://www.genome.jp/dbget-bin/www_bget?ko:K00277	--	--	gi|1025337628|ref|XP_016391229.1|	6.6e-147	275/336(81.85)	526	PREDICTED: protein-lysine 6-oxidase-like isoform X1 [Sinocyclocheilus rhinocerous]	XM_016535743.1	0	281/337(83.38)	540	PREDICTED: Sinocyclocheilus rhinocerous protein-lysine 6-oxidase-like (LOC107726222), transcript variant X1, mRNA	sp|P16636|LYOX_RAT	4.1e-109	195/283(68.90)	396	Protein-lysine 6-oxidase OS=Rattus norvegicus GN=Lox PE=1 SV=2
CAFS_CC_T_00239546	7	GO:0004970: ionotropic glutamate receptor activity (molecular_function); GO:0005234: extracellular-glutamate-gated ion channel activity (molecular_function); GO:0005887: integral component of plasma membrane (cellular_component); GO:0030054: cell junction (cellular_component); GO:0034220: ion transmembrane transport (biological_process); GO:0035235: ionotropic glutamate receptor signaling pathway…	K05207|GRID2	http://www.genome.jp/dbget-bin/www_bget?ko:K05207	[PET]	--	gi|1025187148|ref|XP_016422646.1|	8e-159	275/278(98.92)	565	PREDICTED: glutamate receptor ionotropic, delta-2 isoform X1 [Sinocyclocheilus rhinocerous]	XM_016254389.1	1e-175	274/278(98.56)	520	PREDICTED: Sinocyclocheilus grahami glutamate receptor ionotropic, delta-2-like (LOC107568412), partial mRNA	sp|Q68Y21|GRID2_DANRE	7.1e-160	273/278(98.20)	564	Glutamate receptor delta-2 subunit OS=Danio rerio GN=grid2 PE=2 SV=1
CAFS_CC_T_00240417	--	--	--	--	--	--	--	--	--	--	--	LN593313.1	3e-66	107/108(99.07)	217	Cyprinus carpio genome assembly common carp genome ,scaffold 000010461	--	--	--	--	--
CAFS_CC_T_00242429	5	GO:0004489: methylenetetrahydrofolate reductase (NAD(P)H) activity (molecular_function); GO:0005829: cytosol (cellular_component); GO:0006555: methionine metabolic process (biological_process); GO:0035999: tetrahydrofolate interconversion (biological_process); GO:0055114: oxidation-reduction process (biological_process);	K00297|metF, MTHFR	http://www.genome.jp/dbget-bin/www_bget?ko:K00297	[E]	Amino acid transport and metabolism	gi|1025080144|ref|XP_016339792.1|	0	634/652(97.24)	1323	PREDICTED: methylenetetrahydrofolate reductase-like [Sinocyclocheilus anshuiensis]	XM_016515643.1	0	631/653(96.63)	1271	PREDICTED: Sinocyclocheilus rhinocerous methylenetetrahydrofolate reductase (NAD(P)H) (mthfr), mRNA	sp|Q5I598|MTHR_BOVIN	0	504/620(81.29)	1097	Methylenetetrahydrofolate reductase OS=Bos taurus GN=MTHFR PE=2 SV=1
CAFS_CC_T_00246181	3	GO:0000166: nucleotide binding (molecular_function); GO:0001944: vasculature development (biological_process); GO:0003676: nucleic acid binding (molecular_function);	--	--	--	--	gi|1024969874|ref|XP_016306305.1|	3.9e-296	603/619(97.42)	1023	PREDICTED: ecto-NOX disulfide-thiol exchanger 1-like isoform X1 [Sinocyclocheilus anshuiensis]	XM_016450821.1	0	603/619(97.42)	1145	PREDICTED: Sinocyclocheilus anshuiensis ecto-NOX disulfide-thiol exchanger 1-like (LOC107661308), transcript variant X3, mRNA	sp|Q8BHR2|ENOX1_MOUSE	1e-216	470/622(75.56)	754	Ecto-NOX disulfide-thiol exchanger 1 OS=Mus musculus GN=Enox1 PE=1 SV=1
CAFS_CC_T_00243489	4	GO:0000977: RNA polymerase II regulatory region sequence-specific DNA binding (molecular_function); GO:0000981: RNA polymerase II transcription factor activity, sequence-specific DNA binding (molecular_function); GO:0005634: nucleus (cellular_component); GO:0046983: protein dimerization activity (molecular_function);	K09075|NHLH, HEN, NSCL	http://www.genome.jp/dbget-bin/www_bget?ko:K09075	[K]	Transcription	gi|966655698|gb|KTF90552.1|	8.3e-57	122/122(100.00)	225	hypothetical protein cypCar_00024091 [Cyprinus carpio]	XM_016527358.1	9e-56	119/122(97.54)	177	PREDICTED: Sinocyclocheilus rhinocerous helix-loop-helix protein 2-like (LOC107719823), mRNA	sp|Q02576|HEN1_MOUSE	2e-26	69/73(94.52)	119	Helix-loop-helix protein 1 OS=Mus musculus GN=Nhlh1 PE=2 SV=1
CAFS_CC_T_00245448	--	--	--	--	--	--	gi|1020542233|ref|XP_016107856.1|	4.2e-308	556/631(88.11)	1063	PREDICTED: NACHT, LRR and PYD domains-containing protein 12-like [Sinocyclocheilus grahami]	XM_016252370.1	0	594/723(82.16)	1067	PREDICTED: Sinocyclocheilus grahami NACHT, LRR and PYD domains-containing protein 12-like (LOC107566823), mRNA	sp|B0FPE9|NALP3_MACMU	2.7e-57	205/703(29.16)	224	NACHT, LRR and PYD domains-containing protein 3 OS=Macaca mulatta GN=NLRP3 PE=2 SV=1
CAFS_CC_T_00082270	9	GO:0005634: nucleus (cellular_component); GO:0006355: regulation of transcription, DNA-templated (biological_process); GO:0021953: central nervous system neuron differentiation (biological_process); GO:0031076: embryonic camera-type eye development (biological_process); GO:0035118: embryonic pectoral fin morphogenesis (biological_process); GO:0042462: eye photoreceptor cell development (biologica…	--	--	[K]	Transcription	gi|1025230510|ref|XP_016432149.1|	1.7e-184	399/417(95.68)	651	PREDICTED: iroquois-class homeodomain protein irx-1-like isoform X2 [Sinocyclocheilus rhinocerous]	XM_016576663.1	0	409/440(92.95)	666	PREDICTED: Sinocyclocheilus rhinocerous iroquois-class homeodomain protein irx-1-like (LOC107758835), transcript variant X2, mRNA	sp|Q6F2E3|IRX1_XENTR	3.9e-109	273/388(70.36)	396	Iroquois-class homeodomain protein irx-1 OS=Xenopus tropicalis GN=irx1 PE=2 SV=1
CAFS_CC_T_00182817	--	--	K17269|MBP	http://www.genome.jp/dbget-bin/www_bget?ko:K17269	--	--	gi|1020541832|ref|XP_016107777.1|	2.1e-81	201/418(48.09)	309	PREDICTED: uncharacterized protein LOC107566763, partial [Sinocyclocheilus grahami]	LN590678.1	0	313/387(80.88)	560	Cyprinus carpio genome assembly common carp genome, scaffold: LG28, chromosome: 28	--	--	--	--	--
CAFS_CC_T_00032249	1	GO:0004872: receptor activity (molecular_function);	--	--	--	--	gi|1025038468|ref|XP_016326942.1|	3.7e-245	412/429(96.04)	853	PREDICTED: GDNF family receptor alpha-4-like [Sinocyclocheilus anshuiensis]	XM_016471456.1	0	412/429(96.04)	775	PREDICTED: Sinocyclocheilus anshuiensis GDNF family receptor alpha-4-like (LOC107676775), mRNA	sp|O93512|GFRA4_CHICK	5.7e-137	229/402(56.97)	488	GDNF family receptor alpha-4 OS=Gallus gallus GN=GFRA4 PE=2 SV=1
CAFS_CC_T_00156171	--	--	K12871|CCDC12	http://www.genome.jp/dbget-bin/www_bget?ko:K12871	[S]	Function unknown	gi|966640134|gb|KTF75048.1|	3e-78	163/163(100.00)	297	hypothetical protein cypCar_00032185 [Cyprinus carpio]	XM_016267115.1	1e-87	139/142(97.89)	265	PREDICTED: Sinocyclocheilus grahami coiled-coil domain-containing protein 12-like (LOC107581540), mRNA	sp|Q8R344|CCD12_MOUSE	1e-46	108/160(67.50)	187	Coiled-coil domain-containing protein 12 OS=Mus musculus GN=Ccdc12 PE=1 SV=2
CAFS_CC_T_00066690	1	GO:0016021: integral component of membrane (cellular_component);	K04859|CACNA2D2	http://www.genome.jp/dbget-bin/www_bget?ko:K04859	[PT]	--	gi|1024928862|ref|XP_016298385.1|	0	1025/1105(92.76)	2025	PREDICTED: voltage-dependent calcium channel subunit alpha-2/delta-2-like [Sinocyclocheilus anshuiensis]	XM_016442899.1	0	1013/1090(92.94)	1983	PREDICTED: Sinocyclocheilus anshuiensis voltage-dependent calcium channel subunit alpha-2/delta-2-like (LOC107655410), mRNA	sp|Q8CFG6|CA2D2_RAT	0	679/1092(62.18)	1340	Voltage-dependent calcium channel subunit alpha-2/delta-2 OS=Rattus norvegicus GN=Cacna2d2 PE=1 SV=1
CAFS_CC_T_00090985	--	--	--	--	--	--	gi|1025147298|ref|XP_016354542.1|	1.7e-119	224/238(94.12)	434	PREDICTED: uncharacterized protein LOC107698125 [Sinocyclocheilus anshuiensis]	XM_016499054.1	4e-142	223/238(93.70)	411	PREDICTED: Sinocyclocheilus anshuiensis uncharacterized LOC107698123 (LOC107698123), mRNA	--	--	--	--	--
CAFS_CC_T_00134216	--	--	K07604|KRT1	http://www.genome.jp/dbget-bin/www_bget?ko:K07604	--	--	gi|966638746|gb|KTF73850.1|	2.9e-149	261/262(99.62)	534	hypothetical protein cypCar_00023270 [Cyprinus carpio]	XM_016570148.1	0	373/427(87.35)	651	PREDICTED: Sinocyclocheilus rhinocerous keratin, type I cytoskeletal 19-like (LOC107753880), mRNA	sp|Q497I4|KRT35_MOUSE	1.2e-49	113/251(45.02)	198	Keratin, type I cuticular Ha5 OS=Mus musculus GN=Krt35 PE=2 SV=1
CAFS_CC_T_00140528	1	GO:0016020: membrane (cellular_component);	--	--	--	--	gi|966647499|gb|KTF82409.1|	4.2e-57	113/113(100.00)	226	hypothetical protein cypCar_00024755 [Cyprinus carpio]	LN593196.1	4e-69	114/120(95.00)	234	Cyprinus carpio genome assembly common carp genome ,scaffold 000006399	--	--	--	--	--
CAFS_CC_T_00167800	4	GO:0005886: plasma membrane (cellular_component); GO:0007155: cell adhesion (biological_process); GO:0007605: sensory perception of sound (biological_process); GO:0031225: anchored component of membrane (cellular_component);	K06763|CNTN5	http://www.genome.jp/dbget-bin/www_bget?ko:K06763	[T]	Signal transduction mechanisms	gi|1020546383|ref|XP_016108703.1|	0	1013/1056(95.93)	2037	PREDICTED: contactin-5 [Sinocyclocheilus grahami]	XM_016490714.1	0	999/1036(96.43)	1989	PREDICTED: Sinocyclocheilus anshuiensis contactin-5 (LOC107691883), transcript variant X1, mRNA	sp|Q7ZW34|CNTN5_DANRE	0	983/1056(93.09)	1986	Contactin-5 OS=Danio rerio GN=cntn5 PE=2 SV=1
CAFS_CC_T_00008600	5	GO:0005634: nucleus (cellular_component); GO:0005737: cytoplasm (cellular_component); GO:0006166: purine ribonucleoside salvage (biological_process); GO:0017061: S-methyl-5-thioadenosine phosphorylase activity (molecular_function); GO:0019509: L-methionine salvage from methylthioadenosine (biological_process);	K00772|E2.4.2.28, mtaP	http://www.genome.jp/dbget-bin/www_bget?ko:K00772	[F]	Nucleotide transport and metabolism	gi|1025168804|ref|XP_016357438.1|	2.1e-156	267/276(96.74)	557	PREDICTED: S-methyl-5&apos;-thioadenosine phosphorylase [Sinocyclocheilus anshuiensis]	XM_016501952.1	0	267/277(96.39)	562	PREDICTED: Sinocyclocheilus anshuiensis S-methyl-5'-thioadenosine phosphorylase (LOC107700323), mRNA	sp|Q9CQ65|MTAP_MOUSE	6.9e-128	215/270(79.63)	458	S-methyl-5&apos;-thioadenosine phosphorylase OS=Mus musculus GN=Mtap PE=2 SV=1
CAFS_CC_T_00034304	2	GO:0003676: nucleic acid binding (molecular_function); GO:0008270: zinc ion binding (molecular_function);	--	--	--	--	gi|125851898|ref|XP_001335379.1|	6.4e-37	76/100(76.00)	159	PREDICTED: uncharacterized protein si:dkey-210i3.1 [Danio rerio]	LN591203.1	1e-61	98/100(98.00)	211	Cyprinus carpio genome assembly common carp genome ,scaffold 000028964	--	--	--	--	--
CAFS_CC_T_00078263	5	GO:0000166: nucleotide binding (molecular_function); GO:0000398: mRNA splicing, via spliceosome (biological_process); GO:0003729: mRNA binding (molecular_function); GO:0017069: snRNA binding (molecular_function); GO:0048813: dendrite morphogenesis (biological_process);	--	--	[R]	General function prediction only	gi|1020520339|ref|XP_016099557.1|	4.4e-111	203/204(99.51)	406	PREDICTED: RNA-binding protein with multiple splicing-like isoform X1 [Sinocyclocheilus grahami]	XM_016466813.1	3e-129	203/204(99.51)	376	PREDICTED: Sinocyclocheilus anshuiensis RNA-binding protein with multiple splicing (LOC107673281), transcript variant X1, mRNA	sp|Q6ZRY4|RBPS2_HUMAN	9.4e-90	166/191(86.91)	330	RNA-binding protein with multiple splicing 2 OS=Homo sapiens GN=RBPMS2 PE=2 SV=1
CAFS_CC_T_00107679	9	GO:0000786: nucleosome (cellular_component); GO:0000790: nuclear chromatin (cellular_component); GO:0003677: DNA binding (molecular_function); GO:0005615: extracellular space (cellular_component); GO:0006342: chromatin silencing (biological_process); GO:0045087: innate immune response (biological_process); GO:0046982: protein heterodimerization activity (molecular_function); GO:0050830: defense r…	K11251|H2A	http://www.genome.jp/dbget-bin/www_bget?ko:K11251	[B]	Chromatin structure and dynamics	gi|432843014|ref|XP_004065541.1|	6.9e-62	127/127(100.00)	242	PREDICTED: histone H2A-like [Oryzias latipes]	XM_004065493.2	3e-67	104/104(100.00)	207	PREDICTED: Oryzias latipes histone H2A-like (LOC101161532), mRNA	sp|P02264|H2A_ONCMY	2e-61	124/126(98.41)	236	Histone H2A OS=Oncorhynchus mykiss PE=1 SV=2
CAFS_CC_T_00120625	2	GO:0005509: calcium ion binding (molecular_function); GO:0016021: integral component of membrane (cellular_component);	--	--	[T]	Signal transduction mechanisms	gi|1025147058|ref|XP_016415876.1|	0	4222/4532(93.16)	6147	PREDICTED: low-density lipoprotein receptor-related protein 1B-like [Sinocyclocheilus rhinocerous]	XM_017357883.1	0	4394/4577(96.00)	8780	PREDICTED: Danio rerio low density lipoprotein receptor-related protein 1Bb (lrp1bb), mRNA	sp|Q9NZR2|LRP1B_HUMAN	0	3232/4545(71.11)	4326	Low-density lipoprotein receptor-related protein 1B OS=Homo sapiens GN=LRP1B PE=1 SV=2
CAFS_CC_T_00127614	--	--	--	--	--	--	gi|966666485|gb|KTG00225.1|	3.3e-205	400/453(88.30)	720	hypothetical protein cypCar_00025902 [Cyprinus carpio]	XM_016570447.1	0	430/501(85.83)	705	PREDICTED: Sinocyclocheilus rhinocerous cilia- and flagella-associated protein 97-like (LOC107754126), transcript variant X2, mRNA	sp|A4IJ15|K1430_XENTR	8.8e-33	140/429(32.63)	142	UPF0501 protein KIAA1430 homolog OS=Xenopus tropicalis PE=2 SV=1
CAFS_CC_T_00125287	2	GO:0005634: nucleus (cellular_component); GO:0006260: DNA replication (biological_process);	K03505|POLD4	http://www.genome.jp/dbget-bin/www_bget?ko:K03505	--	--	gi|1025367460|ref|XP_016396848.1|	2.4e-55	103/108(95.37)	220	PREDICTED: DNA polymerase delta subunit 4-like isoform X1 [Sinocyclocheilus rhinocerous]	NM_001256200.1	3e-46	102/108(94.44)	155	Danio rerio si:dkey-28b4.7 (si:dkey-28b4.7), mRNA	sp|Q3T0X9|DPOD4_BOVIN	9.2e-20	47/104(45.19)	97	DNA polymerase delta subunit 4 OS=Bos taurus GN=POLD4 PE=1 SV=1
CAFS_CC_T_00160215	2	GO:0003723: RNA binding (molecular_function); GO:0008270: zinc ion binding (molecular_function);	K15686|MEX3, RKHD	http://www.genome.jp/dbget-bin/www_bget?ko:K15686	[R]	General function prediction only	gi|966708054|gb|KTG40294.1|	1e-263	490/545(89.91)	915	hypothetical protein cypCar_00012957, partial [Cyprinus carpio]	XM_016282005.1	0	509/565(90.09)	900	PREDICTED: Sinocyclocheilus grahami RNA-binding protein MEX3B-like (LOC107592477), mRNA	sp|A1L020|MEX3A_HUMAN	1.3e-106	288/540(53.33)	388	RNA-binding protein MEX3A OS=Homo sapiens GN=MEX3A PE=1 SV=1
CAFS_CC_T_00164998	11	GO:0002679: respiratory burst involved in defense response (biological_process); GO:0005260: intracellular ATPase-gated chloride channel activity (molecular_function); GO:0005524: ATP binding (molecular_function); GO:0016324: apical plasma membrane (cellular_component); GO:0031016: pancreas development (biological_process); GO:0031901: early endosome membrane (cellular_component); GO:0034707: chl…	K05031|CFTR	http://www.genome.jp/dbget-bin/www_bget?ko:K05031	[Q]	Secondary metabolites biosynthesis, transport and catabolism	gi|1024969077|ref|XP_016305871.1|	0	1447/1487(97.31)	2793	PREDICTED: cystic fibrosis transmembrane conductance regulator [Sinocyclocheilus anshuiensis]	XM_016450385.1	0	1447/1487(97.31)	2847	PREDICTED: Sinocyclocheilus anshuiensis cystic fibrosis transmembrane conductance regulator (cftr), mRNA	sp|Q07DZ6|CFTR_ORNAN	0	840/1509(55.67)	1612	Cystic fibrosis transmembrane conductance regulator OS=Ornithorhynchus anatinus GN=CFTR PE=3 SV=1
CAFS_CC_T_00170926	3	GO:0003677: DNA binding (molecular_function); GO:0006338: chromatin remodeling (biological_process); GO:0090544: BAF-type complex (cellular_component);	K11653|ARID1	http://www.genome.jp/dbget-bin/www_bget?ko:K11653	[B]	Chromatin structure and dynamics	gi|966672652|gb|KTG06033.1|	0	1558/1652(94.31)	2441	hypothetical protein cypCar_00017485, partial [Cyprinus carpio]	XM_016502464.1	0	1374/1428(96.22)	2336	PREDICTED: Sinocyclocheilus anshuiensis AT-rich interactive domain-containing protein 1A-like (LOC107700714), transcript variant X1, mRNA	sp|A2BH40|ARI1A_MOUSE	0	986/1732(56.93)	1530	AT-rich interactive domain-containing protein 1A OS=Mus musculus GN=Arid1a PE=1 SV=1
CAFS_CC_T_00170694	24	GO:0000243: commitment complex (cellular_component); GO:0000245: spliceosomal complex assembly (biological_process); GO:0000387: spliceosomal snRNP assembly (biological_process); GO:0002230: positive regulation of defense response to virus by host (biological_process); GO:0005515: protein binding (molecular_function); GO:0005654: nucleoplasm (cellular_component); GO:0005682: U5 snRNP (cellular_co…	K11087|SNRPD1, SMD1	http://www.genome.jp/dbget-bin/www_bget?ko:K11087	[A]	RNA processing and modification	gi|348513171|ref|XP_003444116.1|	9e-37	79/80(98.75)	159	PREDICTED: small nuclear ribonucleoprotein Sm D1 [Oreochromis niloticus]	XM_016567592.1	2e-57	90/91(98.90)	184	PREDICTED: Sinocyclocheilus rhinocerous small nuclear ribonucleoprotein Sm D1 (LOC107751822), mRNA	sp|Q3ZC10|SMD1_BOVIN	9.8e-36	74/78(94.87)	150	Small nuclear ribonucleoprotein Sm D1 OS=Bos taurus GN=SNRPD1 PE=3 SV=1
CAFS_CC_T_00222390	1	GO:0016020: membrane (cellular_component);	K17599|TMEM132	http://www.genome.jp/dbget-bin/www_bget?ko:K17599	[S]	Function unknown	gi|966714849|gb|KTG47087.1|	0	617/618(99.84)	1209	hypothetical protein cypCar_00015852, partial [Cyprinus carpio]	XM_016511947.1	0	609/639(95.31)	1157	PREDICTED: Sinocyclocheilus rhinocerous transmembrane protein 132C-like (LOC107707847), mRNA	sp|Q14DG7|T132B_HUMAN	4.4e-176	345/629(54.85)	619	Transmembrane protein 132B OS=Homo sapiens GN=TMEM132B PE=2 SV=2
CAFS_CC_T_00246324	4	GO:0003774: motor activity (molecular_function); GO:0003779: actin binding (molecular_function); GO:0005524: ATP binding (molecular_function); GO:0016459: myosin complex (cellular_component);	K17481|MYO16	http://www.genome.jp/dbget-bin/www_bget?ko:K17481	[N]	Cell motility	gi|1025291928|ref|XP_016378798.1|	1.3e-137	245/251(97.61)	495	PREDICTED: unconventional myosin-XVI-like [Sinocyclocheilus rhinocerous]	XM_016232534.1	7e-155	239/251(95.22)	479	PREDICTED: Sinocyclocheilus grahami myosin XVI (myo16), mRNA	sp|Q5DU14|MYO16_MOUSE	1.8e-83	153/251(60.96)	310	Myosin-XVI OS=Mus musculus GN=Myo16 PE=1 SV=2
CAFS_CC_T_00009412	3	GO:0007186: G-protein coupled receptor signaling pathway (biological_process); GO:0015054: gastrin receptor activity (molecular_function); GO:0016021: integral component of membrane (cellular_component);	K04194|CCKAR	http://www.genome.jp/dbget-bin/www_bget?ko:K04194	[R]	General function prediction only	gi|1024949010|ref|XP_016363635.1|	8.3e-232	419/442(94.80)	808	PREDICTED: cholecystokinin receptor-like isoform X2 [Sinocyclocheilus anshuiensis]	XM_016508149.1	0	419/442(94.80)	826	PREDICTED: Sinocyclocheilus anshuiensis cholecystokinin receptor-like (LOC107705035), transcript variant X2, mRNA	sp|P70031|CCKAR_XENLA	1.1e-140	262/388(67.53)	501	Cholecystokinin receptor OS=Xenopus laevis GN=cckar PE=2 SV=1
CAFS_CC_T_00014594	3	GO:0021884: forebrain neuron development (biological_process); GO:0048703: embryonic viscerocranium morphogenesis (biological_process); GO:0070050: neuron cellular homeostasis (biological_process);	--	--	--	--	gi|966704247|gb|KTG36488.1|	0	922/1116(82.62)	1266	hypothetical protein cypCar_00006382 [Cyprinus carpio]	XM_016503139.1	0	980/1050(93.33)	1325	PREDICTED: Sinocyclocheilus anshuiensis autism susceptibility gene 2 protein-like (LOC107701171), transcript variant X1, mRNA	sp|Q8WXX7|AUTS2_HUMAN	1.3e-227	553/910(60.77)	791	Autism susceptibility gene 2 protein OS=Homo sapiens GN=AUTS2 PE=1 SV=1
CAFS_CC_T_00018173	--	--	--	--	--	--	--	--	--	--	--	LN590682.1	1e-15	39/39(100.00)	80.5	Cyprinus carpio genome assembly common carp genome, scaffold: LG21, chromosome: 21	--	--	--	--	--
CAFS_CC_T_00018699	--	--	--	--	--	--	gi|1020393230|ref|XP_016143415.1|	3.7e-18	65/80(81.25)	97	PREDICTED: kazrin-like [Sinocyclocheilus grahami]	BX927392.9	7e-23	48/49(97.96)	102	Zebrafish DNA sequence from clone DKEY-17E11 in linkage group 11, complete sequence	sp|Q674X7|KAZRN_HUMAN	1.2e-10	35/40(87.50)	67	Kazrin OS=Homo sapiens GN=KAZ PE=1 SV=2
CAFS_CC_T_00001726	11	GO:0000981: RNA polymerase II transcription factor activity, sequence-specific DNA binding (molecular_function); GO:0003682: chromatin binding (molecular_function); GO:0005515: protein binding (molecular_function); GO:0005634: nucleus (cellular_component); GO:0005737: cytoplasm (cellular_component); GO:0006357: regulation of transcription from RNA polymerase II promoter (biological_process); GO:0…	K09270|SOX7S	http://www.genome.jp/dbget-bin/www_bget?ko:K09270	[K]	Transcription	gi|1020489375|ref|XP_016150416.1|	3.9e-234	425/462(91.99)	816	PREDICTED: transcription factor Sox-9-A-like [Sinocyclocheilus grahami]	XM_016294930.1	0	425/462(91.99)	814	PREDICTED: Sinocyclocheilus grahami transcription factor Sox-9-A-like (LOC107602436), mRNA	sp|Q6DFF5|SOX9B_XENLA	3.3e-169	335/482(69.50)	595	Transcription factor Sox-9-B OS=Xenopus laevis GN=sox9-b PE=2 SV=1
CAFS_CC_T_00082179	2	GO:0003824: catalytic activity (molecular_function); GO:0008152: metabolic process (biological_process);	K00167|E1.2.4.4B, bkdA2	http://www.genome.jp/dbget-bin/www_bget?ko:K00167	[C]	Energy production and conversion	gi|1020517894|ref|XP_016098264.1|	2.9e-38	79/99(79.80)	164	PREDICTED: 2-oxoisovalerate dehydrogenase subunit beta, mitochondrial-like [Sinocyclocheilus grahami]	XR_001796031.1	1e-47	74/77(96.10)	161	PREDICTED: Danio rerio uncharacterized LOC108179013 (LOC108179013), ncRNA	sp|P21953|ODBB_HUMAN	7.1e-37	67/75(89.33)	154	2-oxoisovalerate dehydrogenase subunit beta, mitochondrial OS=Homo sapiens GN=BCKDHB PE=1 SV=2
CAFS_CC_T_00233398	2	GO:0005198: structural molecule activity (molecular_function); GO:0005882: intermediate filament (cellular_component);	--	--	--	--	gi|1020475403|ref|XP_016142948.1|	1.3e-297	558/637(87.60)	1028	PREDICTED: intermediate filament family orphan 1-like [Sinocyclocheilus grahami]	XM_016232197.1	0	591/637(92.78)	1140	PREDICTED: Sinocyclocheilus grahami intermediate filament family orphan 1-like (LOC107550819), mRNA	sp|Q0D2I5|IFFO1_HUMAN	4.2e-152	327/514(63.62)	539	Intermediate filament family orphan 1 OS=Homo sapiens GN=IFFO1 PE=2 SV=2
CAFS_CC_T_00060100	--	--	--	--	--	--	gi|148540010|ref|NP_001020723.2|	8.7e-20	49/60(81.67)	102	uncharacterized protein LOC568418 [Danio rerio]	LN590696.1	5e-31	60/60(100.00)	124	Cyprinus carpio genome assembly common carp genome, scaffold: LG32, chromosome: 32	--	--	--	--	--
CAFS_CC_T_00064837	10	GO:0005031: tumor necrosis factor-activated receptor activity (molecular_function); GO:0005887: integral component of plasma membrane (cellular_component); GO:0006954: inflammatory response (biological_process); GO:0006955: immune response (biological_process); GO:0007275: multicellular organism development (biological_process); GO:0032496: response to lipopolysaccharide (biological_process); GO:…	K04722|TNFRSF10, TRAILR	http://www.genome.jp/dbget-bin/www_bget?ko:K04722	--	--	gi|1020529389|ref|XP_016104379.1|	1.8e-159	365/429(85.08)	568	PREDICTED: tumor necrosis factor receptor superfamily member 6-like [Sinocyclocheilus grahami]	XM_016491284.1	0	371/429(86.48)	628	PREDICTED: Sinocyclocheilus anshuiensis tumor necrosis factor receptor superfamily member 1A-like (LOC107692299), mRNA	--	--	--	--	--
CAFS_CC_T_00073826	3	GO:0001077: transcriptional activator activity, RNA polymerase II core promoter proximal region sequence-specific binding (molecular_function); GO:0005634: nucleus (cellular_component); GO:0043565: sequence-specific DNA binding (molecular_function);	--	--	[S]	Function unknown	gi|1025129171|ref|XP_016351274.1|	0	1516/1643(92.27)	2706	PREDICTED: calmodulin-binding transcription activator 1-like isoform X1 [Sinocyclocheilus anshuiensis]	XM_016495788.1	0	1518/1643(92.39)	2501	PREDICTED: Sinocyclocheilus anshuiensis calmodulin-binding transcription activator 1-like (LOC107695759), transcript variant X1, mRNA	sp|A2A891|CMTA1_MOUSE	0	959/1659(57.81)	1480	Calmodulin-binding transcription activator 1 OS=Mus musculus GN=Camta1 PE=2 SV=1
CAFS_CC_T_00078444	7	GO:0005887: integral component of plasma membrane (cellular_component); GO:0008519: ammonium transmembrane transporter activity (molecular_function); GO:0015695: organic cation transport (biological_process); GO:0016324: apical plasma membrane (cellular_component); GO:0019740: nitrogen utilization (biological_process); GO:0072488: ammonium transmembrane transport (biological_process); GO:0097272:…	K06580|SLC42A, RHAG, RHBG, RHCG	http://www.genome.jp/dbget-bin/www_bget?ko:K06580	[UR]	--	gi|966642898|gb|KTF77810.1|	6.8e-275	469/479(97.91)	952	hypothetical protein cypCar_00037445 [Cyprinus carpio]	XM_016528604.1	0	446/497(89.74)	842	PREDICTED: Sinocyclocheilus rhinocerous ammonium transporter Rh type C-like (LOC107720776), mRNA	sp|Q18PF5|RHCG1_TAKRU	1.1e-234	383/468(81.84)	813	Ammonium transporter Rh type C 1 OS=Takifugu rubripes GN=rhcg1 PE=2 SV=1
CAFS_CC_T_00083512	9	GO:0005891: voltage-gated calcium channel complex (cellular_component); GO:0008332: low voltage-gated calcium channel activity (molecular_function); GO:0019228: neuronal action potential (biological_process); GO:0030317: flagellated sperm motility (biological_process); GO:0034765: regulation of ion transmembrane transport (biological_process); GO:0045956: positive regulation of calcium ion-depend…	K04856|CACNA1I	http://www.genome.jp/dbget-bin/www_bget?ko:K04856	[PT]	--	gi|1025058518|ref|XP_016332375.1|	0	1938/2093(92.59)	3520	PREDICTED: voltage-dependent T-type calcium channel subunit alpha-1I-like [Sinocyclocheilus anshuiensis]	XM_016476889.1	0	1972/2093(94.22)	3320	PREDICTED: Sinocyclocheilus anshuiensis voltage-dependent T-type calcium channel subunit alpha-1I-like (LOC107680839), mRNA	sp|Q9Z0Y8|CAC1I_RAT	0	1274/2020(63.07)	2040	Voltage-dependent T-type calcium channel subunit alpha-1I OS=Rattus norvegicus GN=Cacna1i PE=2 SV=3
CAFS_CC_T_00142646	8	GO:0005007: fibroblast growth factor-activated receptor activity (molecular_function); GO:0005524: ATP binding (molecular_function); GO:0005886: plasma membrane (cellular_component); GO:0006468: protein phosphorylation (biological_process); GO:0006915: apoptotic process (biological_process); GO:0008284: positive regulation of cell proliferation (biological_process); GO:0008543: fibroblast growth …	K05094|FGFR3	http://www.genome.jp/dbget-bin/www_bget?ko:K05094	[T]	Signal transduction mechanisms	gi|1025382814|ref|XP_016400993.1|	0	832/880(94.55)	1684	PREDICTED: fibroblast growth factor receptor 3 isoform X2 [Sinocyclocheilus rhinocerous]	XM_016457824.1	0	851/884(96.27)	1662	PREDICTED: Sinocyclocheilus anshuiensis fibroblast growth factor receptor 3 (LOC107666479), transcript variant X2, mRNA	sp|Q9I8X3|FGFR3_DANRE	0	759/801(94.76)	1535	Fibroblast growth factor receptor 3 OS=Danio rerio GN=fgfr3 PE=2 SV=1
CAFS_CC_T_00152430	7	GO:0004970: ionotropic glutamate receptor activity (molecular_function); GO:0005234: extracellular-glutamate-gated ion channel activity (molecular_function); GO:0016021: integral component of membrane (cellular_component); GO:0030054: cell junction (cellular_component); GO:0034220: ion transmembrane transport (biological_process); GO:0035235: ionotropic glutamate receptor signaling pathway (biolo…	K05201|GRIK1	http://www.genome.jp/dbget-bin/www_bget?ko:K05201	[PET]	--	gi|1024997428|ref|XP_016318100.1|	0	598/612(97.71)	1188	PREDICTED: glutamate receptor ionotropic, kainate 1 isoform X2 [Sinocyclocheilus anshuiensis]	XM_016462614.1	0	598/612(97.71)	1194	PREDICTED: Sinocyclocheilus anshuiensis glutamate receptor ionotropic, kainate 1 (LOC107670116), transcript variant X2, mRNA	sp|P39086|GRIK1_HUMAN	3.8e-296	497/583(85.25)	1018	Glutamate receptor, ionotropic kainate 1 OS=Homo sapiens GN=GRIK1 PE=1 SV=1
CAFS_CC_T_00160721	--	--	--	--	--	--	gi|1025352432|ref|XP_016395241.1|	0	1150/1225(93.88)	2197	PREDICTED: erythroid differentiation-related factor 1-like [Sinocyclocheilus rhinocerous]	XM_016539755.1	0	1153/1226(94.05)	2236	PREDICTED: Sinocyclocheilus rhinocerous erythroid differentiation-related factor 1-like (LOC107729289), mRNA	sp|Q3B7T1|EDRF1_HUMAN	0	860/1227(70.09)	1598	Erythroid differentiation-related factor 1 OS=Homo sapiens GN=EDRF1 PE=1 SV=1
CAFS_CC_T_00187842	4	GO:0005096: GTPase activator activity (molecular_function); GO:0030036: actin cytoskeleton organization (biological_process); GO:0043547: positive regulation of GTPase activity (biological_process); GO:0051056: regulation of small GTPase mediated signal transduction (biological_process);	--	--	[T]	Signal transduction mechanisms	gi|1025269196|ref|XP_016374091.1|	0	702/726(96.69)	1285	PREDICTED: rho GTPase-activating protein 26-like [Sinocyclocheilus rhinocerous]	XM_016518605.1	0	697/726(96.01)	1338	PREDICTED: Sinocyclocheilus rhinocerous rho GTPase-activating protein 26-like (LOC107713172), mRNA	sp|Q9UNA1|RHG26_HUMAN	1.9e-278	516/773(66.75)	959	Rho GTPase-activating protein 26 OS=Homo sapiens GN=ARHGAP26 PE=1 SV=1
CAFS_CC_T_00215238	3	GO:0005488: binding (molecular_function); GO:0043170: macromolecule metabolic process (biological_process); GO:0044238: primary metabolic process (biological_process);	--	--	[R]	General function prediction only	gi|1040661615|ref|XP_017214371.1|	6.1e-70	129/192(67.19)	270	PREDICTED: uncharacterized mitochondrial protein AtMg00860-like [Danio rerio]	LN598534.1	3e-124	191/192(99.48)	395	Cyprinus carpio genome assembly common carp genome ,scaffold 000000417	sp|Q05654|RTF21_SCHPO	2.4e-34	75/192(39.06)	146	Retrotransposable element Tf2 155 kDa protein type 1 OS=Schizosaccharomyces pombe GN=Tf2-1 PE=2 SV=1
CAFS_CC_T_00220481	6	GO:0004252: serine-type endopeptidase activity (molecular_function); GO:0005044: scavenger receptor activity (molecular_function); GO:0005509: calcium ion binding (molecular_function); GO:0006508: proteolysis (biological_process); GO:0007596: blood coagulation (biological_process); GO:0016021: integral component of membrane (cellular_component);	K09635|TMPRSS4	http://www.genome.jp/dbget-bin/www_bget?ko:K09635	[E]	Amino acid transport and metabolism	gi|1020481509|ref|XP_016146228.1|	1.3e-242	409/431(94.90)	844	PREDICTED: transmembrane protease serine 4-like isoform X1 [Sinocyclocheilus grahami]	XM_016290742.1	0	388/409(94.87)	760	PREDICTED: Sinocyclocheilus grahami transmembrane protease serine 4-like (LOC107599211), transcript variant X1, mRNA	sp|Q8VCA5|TMPS4_MOUSE	2.7e-78	158/406(38.92)	293	Transmembrane protease serine 4 OS=Mus musculus GN=Tmprss4 PE=2 SV=1
CAFS_CC_T_00237570	6	GO:0005886: plasma membrane (cellular_component); GO:0016021: integral component of membrane (cellular_component); GO:0034605: cellular response to heat (biological_process); GO:0035774: positive regulation of insulin secretion involved in cellular response to glucose stimulus (biological_process); GO:0046983: protein dimerization activity (molecular_function); GO:1902476: chloride transmembrane …	--	--	[S]	Function unknown	gi|966644816|gb|KTF79728.1|	7.4e-160	280/280(100.00)	569	hypothetical protein cypCar_00035928 [Cyprinus carpio]	XM_016540813.1	9e-166	248/280(88.57)	486	PREDICTED: Sinocyclocheilus rhinocerous anoctamin-1-like (LOC107730080), transcript variant X4, mRNA	sp|Q5XXA6|ANO1_HUMAN	1.2e-85	154/274(56.20)	317	Anoctamin-1 OS=Homo sapiens GN=ANO1 PE=1 SV=1
CAFS_CC_T_00091334	8	GO:0003700: transcription factor activity, sequence-specific DNA binding (molecular_function); GO:0003707: steroid hormone receptor activity (molecular_function); GO:0005496: steroid binding (molecular_function); GO:0005634: nucleus (cellular_component); GO:0006355: regulation of transcription, DNA-templated (biological_process); GO:0008270: zinc ion binding (molecular_function); GO:0043401: ster…	K08553|NR3B2, ESRRB	http://www.genome.jp/dbget-bin/www_bget?ko:K08553	[T]	Signal transduction mechanisms	gi|1025045223|ref|XP_016328797.1|	8.1e-243	431/448(96.21)	845	PREDICTED: steroid hormone receptor ERR2-like [Sinocyclocheilus anshuiensis]	XM_016473311.1	0	431/448(96.21)	863	PREDICTED: Sinocyclocheilus anshuiensis steroid hormone receptor ERR2-like (LOC107678144), mRNA	sp|O95718|ERR2_HUMAN	3.2e-199	354/447(79.19)	695	Steroid hormone receptor ERR2 OS=Homo sapiens GN=ESRRB PE=1 SV=1
CAFS_CC_T_00034647	--	--	K06534|MCAM, CD146	http://www.genome.jp/dbget-bin/www_bget?ko:K06534	--	--	gi|1025299098|ref|XP_016380750.1|	2.9e-299	520/612(84.97)	1033	PREDICTED: cell surface glycoprotein MUC18-like isoform X1 [Sinocyclocheilus rhinocerous]	XM_016525265.1	0	539/612(88.07)	1030	PREDICTED: Sinocyclocheilus rhinocerous cell surface glycoprotein MUC18-like (LOC107718268), transcript variant X2, mRNA	sp|Q9EPF2|MUC18_RAT	2.6e-82	207/603(34.33)	307	Cell surface glycoprotein MUC18 OS=Rattus norvegicus GN=Mcam PE=1 SV=2
CAFS_CC_T_00075151	1	GO:0016021: integral component of membrane (cellular_component);	K05693|PTPRM	http://www.genome.jp/dbget-bin/www_bget?ko:K05693	[T]	Signal transduction mechanisms	gi|66392196|ref|NP_001018143.1|	0	778/894(87.02)	1584	receptor-type tyrosine-protein phosphatase mu precursor [Danio rerio]	NM_001018133.2	0	778/894(87.02)	1531	Danio rerio protein tyrosine phosphatase, receptor type, M, a (ptprma), mRNA BC165678.1 Danio rerio protein tyrosine phosphatase, receptor type, M, mRNA (cDNA clone MGC:192766 IMAGE:100061233), complete cds	sp|P28827|PTPRM_HUMAN	0	582/886(65.69)	1161	Receptor-type tyrosine-protein phosphatase mu OS=Homo sapiens GN=PTPRM PE=1 SV=2
CAFS_CC_T_00092207	2	GO:0005089: Rho guanyl-nucleotide exchange factor activity (molecular_function); GO:0035023: regulation of Rho protein signal transduction (biological_process);	--	--	--	--	gi|1025216365|ref|XP_016430168.1|	1.7e-74	146/150(97.33)	285	PREDICTED: rho guanine nucleotide exchange factor 39-like isoform X1 [Sinocyclocheilus rhinocerous]	XM_016574684.1	4e-148	210/219(95.89)	435	PREDICTED: Sinocyclocheilus rhinocerous rho guanine nucleotide exchange factor 39-like (LOC107757260), transcript variant X3, mRNA	sp|Q0P5E3|CI100_BOVIN	5.1e-31	69/135(51.11)	136	Vav-like protein C9orf100 homolog OS=Bos taurus PE=2 SV=1
CAFS_CC_T_00102355	5	GO:0002376: immune system process (biological_process); GO:0004930: G-protein coupled receptor activity (molecular_function); GO:0005887: integral component of plasma membrane (cellular_component); GO:0035025: positive regulation of Rho protein signal transduction (biological_process); GO:0051482: positive regulation of cytosolic calcium ion concentration involved in phospholipase C-activating G-…	K08404|GPR17	http://www.genome.jp/dbget-bin/www_bget?ko:K08404	--	--	gi|966701891|gb|KTG34132.1|	1.1e-188	339/339(100.00)	665	hypothetical protein cypCar_00000773 [Cyprinus carpio]	XM_016568695.1	0	327/339(96.46)	643	PREDICTED: Sinocyclocheilus rhinocerous uracil nucleotide/cysteinyl leukotriene receptor-like (LOC107752663), transcript variant X1, mRNA	sp|Q13304|GPR17_HUMAN	1.3e-99	186/334(55.69)	364	Uracil nucleotide/cysteinyl leukotriene receptor OS=Homo sapiens GN=GPR17 PE=2 SV=2
CAFS_CC_T_00119504	3	GO:0004674: protein serine/threonine kinase activity (molecular_function); GO:0005524: ATP binding (molecular_function); GO:0006468: protein phosphorylation (biological_process);	K08820|CDK16, PCTK1	http://www.genome.jp/dbget-bin/www_bget?ko:K08820	[R]	General function prediction only	gi|1024975656|ref|XP_016309304.1|	6.6e-275	469/487(96.30)	952	PREDICTED: cyclin-dependent kinase 16-like isoform X1 [Sinocyclocheilus anshuiensis]	XM_016453818.1	0	469/487(96.30)	969	PREDICTED: Sinocyclocheilus anshuiensis cyclin-dependent kinase 16-like (LOC107663588), transcript variant X1, mRNA	sp|Q00536|CDK16_HUMAN	1e-190	336/474(70.89)	667	Cell division protein kinase 16 OS=Homo sapiens GN=CDK16 PE=1 SV=1
CAFS_CC_T_00238771	1	GO:0016772: transferase activity, transferring phosphorus-containing groups (molecular_function);	K00976|FPGT	http://www.genome.jp/dbget-bin/www_bget?ko:K00976	--	--	gi|966645734|gb|KTF80646.1|	0	565/576(98.09)	1131	hypothetical protein cypCar_00032909 [Cyprinus carpio]	XM_016272959.1	0	541/576(93.92)	1078	PREDICTED: Sinocyclocheilus grahami fucose-1-phosphate guanylyltransferase-like (LOC107585822), mRNA	sp|O14772|FPGT_HUMAN	1.2e-166	303/588(51.53)	587	Fucose-1-phosphate guanylyltransferase OS=Homo sapiens GN=FPGT PE=1 SV=2
CAFS_CC_T_00082285	3	GO:0031018: endocrine pancreas development (biological_process); GO:0045879: negative regulation of smoothened signaling pathway (biological_process); GO:0061386: closure of optic fissure (biological_process);	K09268|SOX4_11_12	http://www.genome.jp/dbget-bin/www_bget?ko:K09268	[K]	Transcription	gi|966668368|gb|KTG01749.1|	1.2e-145	316/367(86.10)	522	hypothetical protein cypCar_00019520 [Cyprinus carpio]	XM_016478934.1	3e-140	298/368(80.98)	410	PREDICTED: Sinocyclocheilus anshuiensis SRY-box 4 (sox4), mRNA	sp|Q06831|SOX4_MOUSE	1.2e-68	222/439(50.57)	261	Transcription factor SOX-4 OS=Mus musculus GN=Sox4 PE=1 SV=1
CAFS_CC_T_00016357	1	GO:0016020: membrane (cellular_component);	--	--	--	--	gi|1025199407|ref|XP_016425627.1|	5.2e-63	121/136(88.97)	246	PREDICTED: inactive N-acetylated-alpha-linked acidic dipeptidase-like protein 2 [Sinocyclocheilus rhinocerous]	XM_016570141.1	2e-68	121/138(87.68)	221	PREDICTED: Sinocyclocheilus rhinocerous N-acetylated alpha-linked acidic dipeptidase-like 2 (naaladl2), mRNA	sp|Q58DX5|NADL2_HUMAN	2.6e-30	68/136(50.00)	132	Inactive N-acetylated-alpha-linked acidic dipeptidase-like protein 2 OS=Homo sapiens GN=NAALADL2 PE=1 SV=3
CAFS_CC_T_00030042	1	GO:0003676: nucleic acid binding (molecular_function);	--	--	--	--	gi|1024978702|ref|XP_016310918.1|	1.7e-263	452/522(86.59)	914	PREDICTED: uncharacterized protein LOC107664775 [Sinocyclocheilus anshuiensis]	XM_016455432.1	0	452/522(86.59)	933	PREDICTED: Sinocyclocheilus anshuiensis uncharacterized LOC107664775 (LOC107664775), mRNA	--	--	--	--	--
CAFS_CC_T_00066573	3	GO:0004114: 3',5'-cyclic-nucleotide phosphodiesterase activity (molecular_function); GO:0007165: signal transduction (biological_process); GO:0046872: metal ion binding (molecular_function);	K13298|PDE11	http://www.genome.jp/dbget-bin/www_bget?ko:K13298	[T]	Signal transduction mechanisms	gi|1025116180|ref|XP_016411845.1|	0	863/876(98.52)	1738	PREDICTED: dual 3&apos;,5&apos;-cyclic-AMP and -GMP phosphodiesterase 11A-like [Sinocyclocheilus rhinocerous]	XM_016556359.1	0	896/920(97.39)	1838	PREDICTED: Sinocyclocheilus rhinocerous dual 3',5'-cyclic-AMP and -GMP phosphodiesterase 11A-like (LOC107743218), mRNA	sp|Q1KKS3|PDE11_TAKRU	0	677/870(77.82)	1347	Dual 3&apos;,5&apos;-cyclic-AMP and -GMP phosphodiesterase 11A OS=Takifugu rubripes GN=pde11a PE=3 SV=1
CAFS_CC_T_00046384	1	GO:0007010: cytoskeleton organization (biological_process);	K10453|KLHL16, GAN	http://www.genome.jp/dbget-bin/www_bget?ko:K10453	[TR]	--	gi|1024982459|ref|XP_016312927.1|	4e-241	511/519(98.46)	840	PREDICTED: gigaxonin-like [Sinocyclocheilus anshuiensis]	XM_016550142.1	0	510/519(98.27)	1029	PREDICTED: Sinocyclocheilus rhinocerous gigaxonin-like (LOC107738389), mRNA	sp|Q9H2C0|GAN_HUMAN	4.6e-149	360/518(69.50)	529	Gigaxonin OS=Homo sapiens GN=GAN PE=1 SV=1
CAFS_CC_T_00060675	--	--	--	--	[R]	General function prediction only	gi|966671532|gb|KTG04913.1|	8.7e-106	187/187(100.00)	389	hypothetical protein cypCar_00004543 [Cyprinus carpio]	XM_016514950.1	7e-125	175/187(93.58)	368	PREDICTED: Sinocyclocheilus rhinocerous sterile alpha motif domain-containing protein 5-like (LOC107710209), mRNA	sp|Q5TGI4|SAMD5_HUMAN	7.4e-41	95/169(56.21)	168	Sterile alpha motif domain-containing protein 5 OS=Homo sapiens GN=SAMD5 PE=2 SV=1
CAFS_CC_T_00075774	3	GO:0007186: G-protein coupled receptor signaling pathway (biological_process); GO:0016021: integral component of membrane (cellular_component); GO:0016520: growth hormone-releasing hormone receptor activity (molecular_function);	K04284|GHSR	http://www.genome.jp/dbget-bin/www_bget?ko:K04284	[R]	General function prediction only	gi|306756044|gb|ADN05126.1|	1.2e-168	299/305(98.03)	598	growth hormone secretagogue receptor type 2a [Cyprinus carpio &apos;jian&apos;]	AB504278.1	0	298/305(97.70)	607	Carassius auratus GHS-R mRNA for growth hormone secretagogue receptor 2a type-2, complete cds	sp|Q92847|GHSR_HUMAN	1.4e-132	233/310(75.16)	473	Growth hormone secretagogue receptor type 1 OS=Homo sapiens GN=GHSR PE=1 SV=1
CAFS_CC_T_00079433	--	--	K08114|PTPRZ	http://www.genome.jp/dbget-bin/www_bget?ko:K08114	[T]	Signal transduction mechanisms	gi|1025049121|ref|XP_016329872.1|	0	1670/1816(91.96)	3119	PREDICTED: receptor-type tyrosine-protein phosphatase zeta-like [Sinocyclocheilus anshuiensis]	XM_016474386.1	0	1663/1821(91.32)	3008	PREDICTED: Sinocyclocheilus anshuiensis receptor-type tyrosine-protein phosphatase zeta-like (LOC107678988), mRNA	sp|Q62656|PTPRZ_RAT	0	914/2319(39.41)	1322	Receptor-type tyrosine-protein phosphatase zeta OS=Rattus norvegicus GN=Ptprz1 PE=1 SV=1
CAFS_CC_T_00085667	--	--	--	--	--	--	gi|966659208|gb|KTF94062.1|	1.5e-69	167/176(94.89)	268	hypothetical protein cypCar_00021876 [Cyprinus carpio]	XM_016556103.1	3e-80	169/182(92.86)	266	PREDICTED: Sinocyclocheilus rhinocerous UBA like domain containing 2 (ubald2), transcript variant X2, mRNA	sp|Q6DD24|F00BB_XENLA	4.2e-45	96/127(75.59)	182	Protein FAM100B-B OS=Xenopus laevis GN=fam100b-b PE=2 SV=1
CAFS_CC_T_00089090	1	GO:0006355: regulation of transcription, DNA-templated (biological_process);	K09334|CART1	http://www.genome.jp/dbget-bin/www_bget?ko:K09334	[R]	General function prediction only	gi|1025232246|ref|XP_016364072.1|	4.1e-79	162/199(81.41)	300	PREDICTED: intestine-specific homeobox-like [Sinocyclocheilus rhinocerous]	XM_016270458.1	4e-104	163/199(81.91)	306	PREDICTED: Sinocyclocheilus grahami intestine-specific homeobox-like (LOC107584051), mRNA	sp|Q15699|ALX1_HUMAN	1.1e-18	44/62(70.97)	94	ALX homeobox protein 1 OS=Homo sapiens GN=ALX1 PE=1 SV=2
CAFS_CC_T_00092944	100	GO:0000122: negative regulation of transcription from RNA polymerase II promoter (biological_process); GO:0000790: nuclear chromatin (cellular_component); GO:0000979: RNA polymerase II core promoter sequence-specific DNA binding (molecular_function); GO:0000987: core promoter proximal region sequence-specific DNA binding (molecular_function); GO:0001077: transcriptional activator activity, RNA po…	K17895|GATA3	http://www.genome.jp/dbget-bin/www_bget?ko:K17895	[K]	Transcription	gi|204306643|gb|ACH99859.1|	5.4e-247	430/442(97.29)	859	GATA-3 [Cyprinus carpio]	EU729740.1	0	431/442(97.51)	701	Cyprinus carpio GATA-3 mRNA, complete cds	sp|Q08DV0|GATA3_BOVIN	1.2e-201	352/449(78.40)	703	Trans-acting T-cell-specific transcription factor GATA-3 OS=Bos taurus GN=GATA3 PE=2 SV=1
CAFS_CC_T_00094720	3	GO:0007165: signal transduction (biological_process); GO:0016020: membrane (cellular_component); GO:0042221: response to chemical (biological_process);	K04245|CMKLR1	http://www.genome.jp/dbget-bin/www_bget?ko:K04245	--	--	gi|1025131504|ref|XP_016351695.1|	7.6e-153	281/330(85.15)	546	PREDICTED: chemokine-like receptor 1 [Sinocyclocheilus anshuiensis]	LN591259.1	0	271/272(99.63)	562	Cyprinus carpio genome assembly common carp genome ,scaffold 000029063	sp|Q99788|CML1_HUMAN	1.1e-18	90/324(27.78)	95	Chemokine-like receptor 1 OS=Homo sapiens GN=CMKLR1 PE=2 SV=2
CAFS_CC_T_00097251	--	--	--	--	[L]	Replication, recombination and repair	gi|734648112|ref|XP_010753279.1|	1.3e-74	164/282(58.16)	285	PREDICTED: zinc finger BED domain-containing protein 1-like [Larimichthys crocea]	LN595330.1	1e-147	234/276(84.78)	464	Cyprinus carpio genome assembly common carp genome ,scaffold 000029073	--	--	--	--	--
CAFS_CC_T_00115522	13	GO:0001755: neural crest cell migration (biological_process); GO:0003677: DNA binding (molecular_function); GO:0005615: extracellular space (cellular_component); GO:0006313: transposition, DNA-mediated (biological_process); GO:0015074: DNA integration (biological_process); GO:0016020: membrane (cellular_component); GO:0030215: semaphorin receptor binding (molecular_function); GO:0030335: positive…	K06840|SEMA3	http://www.genome.jp/dbget-bin/www_bget?ko:K06840	[T]	Signal transduction mechanisms	gi|1025263439|ref|XP_016372540.1|	0	555/571(97.20)	1157	PREDICTED: semaphorin-3G-like [Sinocyclocheilus rhinocerous]	XM_016517054.1	0	543/558(97.31)	1138	PREDICTED: Sinocyclocheilus rhinocerous semaphorin-3G-like (LOC107711953), mRNA	sp|Q4LFA9|SEM3G_MOUSE	3.9e-218	355/555(63.96)	758	Semaphorin-3G OS=Mus musculus GN=Sema3g PE=2 SV=1
CAFS_CC_T_00116140	13	GO:0000978: RNA polymerase II core promoter proximal region sequence-specific DNA binding (molecular_function); GO:0003707: steroid hormone receptor activity (molecular_function); GO:0004879: RNA polymerase II transcription factor activity, ligand-activated sequence-specific DNA binding (molecular_function); GO:0005634: nucleus (cellular_component); GO:0005667: transcription factor complex (cellu…	K08561|NR6A1, GCNF	http://www.genome.jp/dbget-bin/www_bget?ko:K08561	[T]	Signal transduction mechanisms	gi|1020529234|ref|XP_016104295.1|	3.1e-258	444/452(98.23)	896	PREDICTED: nuclear receptor subfamily 6 group A member 1-A [Sinocyclocheilus grahami]	XM_016248809.1	0	444/452(98.23)	927	PREDICTED: Sinocyclocheilus grahami nuclear receptor subfamily 6 group A member 1-A (LOC107563838), mRNA	sp|Q9PU65|GCNFA_DANRE	4.2e-255	434/452(96.02)	881	Nuclear receptor subfamily 6 group A member 1-A OS=Danio rerio GN=nr6a1a PE=2 SV=2
CAFS_CC_T_00122874	--	--	--	--	--	--	gi|1025203883|ref|XP_016426855.1|	8.9e-40	82/94(87.23)	169	PREDICTED: putative nuclease HARBI1 [Sinocyclocheilus rhinocerous]	XM_016571369.1	3e-50	82/94(87.23)	171	PREDICTED: Sinocyclocheilus rhinocerous putative nuclease HARBI1 (LOC107754781), mRNA	sp|Q6AZB8|HARB1_DANRE	9.1e-13	35/84(41.67)	74	Putative nuclease HARBI1 OS=Danio rerio GN=harbi1 PE=2 SV=1
CAFS_CC_T_00123654	4	GO:0000398: mRNA splicing, via spliceosome (biological_process); GO:0003723: RNA binding (molecular_function); GO:0071006: U2-type catalytic step 1 spliceosome (cellular_component); GO:0071013: catalytic step 2 spliceosome (cellular_component);	K13100|CWC22	http://www.genome.jp/dbget-bin/www_bget?ko:K13100	[R]	General function prediction only	gi|1025035289|ref|XP_016326089.1|	4.9e-304	679/770(88.18)	1050	PREDICTED: pre-mRNA-splicing factor CWC22 homolog [Sinocyclocheilus anshuiensis]	XM_016293872.1	0	724/775(93.42)	1176	PREDICTED: Sinocyclocheilus grahami pre-mRNA-splicing factor CWC22 homolog (LOC107601622), mRNA	sp|Q08C72|CWC22_DANRE	4.5e-286	664/770(86.23)	985	Pre-mRNA-splicing factor CWC22 homolog OS=Danio rerio GN=cwc22 PE=2 SV=1
CAFS_CC_T_00126004	--	--	--	--	--	--	gi|966698895|gb|KTG31136.1|	2.8e-81	174/200(87.00)	308	hypothetical protein cypCar_00009578 [Cyprinus carpio]	LN590712.1	4e-65	180/200(90.00)	229	Cyprinus carpio genome assembly common carp genome, scaffold: LG2, chromosome: 2	sp|Q1LY84|CC70A_DANRE	3.8e-59	142/200(71.00)	229	UPF0524 protein C3orf70 homolog A OS=Danio rerio GN=si:dkey-24b15.2 PE=2 SV=1
CAFS_CC_T_00125769	8	GO:0003700: transcription factor activity, sequence-specific DNA binding (molecular_function); GO:0003707: steroid hormone receptor activity (molecular_function); GO:0005634: nucleus (cellular_component); GO:0006355: regulation of transcription, DNA-templated (biological_process); GO:0008270: zinc ion binding (molecular_function); GO:0033555: multicellular organismal response to stress (biologica…	K08555|NR3C2, MR	http://www.genome.jp/dbget-bin/www_bget?ko:K08555	[T]	Signal transduction mechanisms	gi|1020400366|ref|XP_016087521.1|	2.2e-215	380/395(96.20)	754	PREDICTED: mineralocorticoid receptor-like [Sinocyclocheilus grahami]	XM_016555554.1	0	380/395(96.20)	786	PREDICTED: Sinocyclocheilus rhinocerous mineralocorticoid receptor-like (LOC107742541), mRNA	sp|Q91573|MCR_XENLA	9.4e-163	286/397(72.04)	574	Mineralocorticoid receptor (Fragment) OS=Xenopus laevis GN=nr3c2 PE=2 SV=1
CAFS_CC_T_00125385	2	GO:0008152: metabolic process (biological_process); GO:0016740: transferase activity (molecular_function);	--	--	--	--	gi|1025367990|ref|XP_016396995.1|	2.9e-42	81/98(82.65)	177	PREDICTED: uncharacterized protein LOC107730646 [Sinocyclocheilus rhinocerous]	LN590718.1	4e-85	142/198(71.72)	282	Cyprinus carpio genome assembly common carp genome, scaffold: LG9, chromosome: 9	--	--	--	--	--
CAFS_CC_T_00139912	4	GO:0005509: calcium ion binding (molecular_function); GO:0005886: plasma membrane (cellular_component); GO:0007156: homophilic cell adhesion via plasma membrane adhesion molecules (biological_process); GO:0016021: integral component of membrane (cellular_component);	K06804|CDH12	http://www.genome.jp/dbget-bin/www_bget?ko:K06804	[S]	Function unknown	gi|1024949111|ref|XP_016295227.1|	6.2e-306	520/525(99.05)	1055	PREDICTED: cadherin-12-like [Sinocyclocheilus anshuiensis]	XM_016439741.1	0	520/525(99.05)	1026	PREDICTED: Sinocyclocheilus anshuiensis cadherin-12-like (LOC107653103), mRNA	sp|Q5RJH3|CAD12_MOUSE	1.2e-234	397/529(75.05)	813	Cadherin-12 OS=Mus musculus GN=Cdh12 PE=2 SV=1
CAFS_CC_T_00003972	--	--	--	--	--	--	gi|1020542233|ref|XP_016107856.1|	3.1e-303	553/641(86.27)	1047	PREDICTED: NACHT, LRR and PYD domains-containing protein 12-like [Sinocyclocheilus grahami]	XM_016252370.1	0	563/660(85.30)	1041	PREDICTED: Sinocyclocheilus grahami NACHT, LRR and PYD domains-containing protein 12-like (LOC107566823), mRNA	sp|Q5DU56|NLRC3_MOUSE	7.2e-55	173/642(26.95)	216	Protein NLRC3 OS=Mus musculus GN=Nlrc3 PE=2 SV=2
CAFS_CC_T_00146171	1	GO:0016746: transferase activity, transferring acyl groups (molecular_function);	K00685|ATE1, ate1	http://www.genome.jp/dbget-bin/www_bget?ko:K00685	[O]	Posttranslational modification, protein turnover, chaperones	gi|1025050224|ref|XP_016330181.1|	1.3e-189	351/436(80.50)	668	PREDICTED: arginyl-tRNA--protein transferase 1-like isoform X1 [Sinocyclocheilus anshuiensis]	XM_016474695.1	0	375/436(86.01)	733	PREDICTED: Sinocyclocheilus anshuiensis arginyl-tRNA--protein transferase 1-like (LOC107679187), transcript variant X1, mRNA	sp|O95260|ATE1_HUMAN	1.6e-107	221/464(47.63)	391	Arginyl-tRNA--protein transferase 1 OS=Homo sapiens GN=ATE1 PE=1 SV=2
CAFS_CC_T_00155502	2	GO:0005615: extracellular space (cellular_component); GO:0007165: signal transduction (biological_process);	--	--	--	--	gi|1025065899|ref|XP_016335863.1|	2e-274	457/497(91.95)	950	PREDICTED: extracellular matrix protein 1-like isoform X1 [Sinocyclocheilus anshuiensis]	XM_016480377.1	0	457/497(91.95)	901	PREDICTED: Sinocyclocheilus anshuiensis extracellular matrix protein 1-like (LOC107684165), transcript variant X1, mRNA	sp|Q16610|ECM1_HUMAN	3.1e-38	106/340(31.18)	161	Extracellular matrix protein 1 OS=Homo sapiens GN=ECM1 PE=1 SV=2
CAFS_CC_T_00173928	2	GO:0016020: membrane (cellular_component); GO:0016740: transferase activity (molecular_function);	K07820|B3GALT2	http://www.genome.jp/dbget-bin/www_bget?ko:K07820	[G]	Carbohydrate transport and metabolism	gi|1024971493|ref|XP_016307179.1|	1e-49	99/136(72.79)	202	PREDICTED: beta-1,3-galactosyltransferase 2-like [Sinocyclocheilus anshuiensis]	LN590689.1	4e-63	87/87(100.00)	186	Cyprinus carpio genome assembly common carp genome, scaffold: LG29, chromosome: 29	sp|O54905|B3GT2_MOUSE	2.6e-34	67/133(50.38)	146	Beta-1,3-galactosyltransferase 2 OS=Mus musculus GN=B3galt2 PE=2 SV=2
CAFS_CC_T_00232501	--	--	--	--	[R]	General function prediction only	gi|992193458|ref|XP_015459787.1|	1.6e-193	359/549(65.39)	681	PREDICTED: uncharacterized protein LOC107197434, partial [Astyanax mexicanus]	LN590695.1	0	327/380(86.05)	655	Cyprinus carpio genome assembly common carp genome, scaffold: LG23, chromosome: 23	--	--	--	--	--
CAFS_CC_T_00180313	--	--	--	--	--	--	gi|966712784|gb|KTG45022.1|	7.6e-103	203/233(87.12)	379	hypothetical protein cypCar_00003309 [Cyprinus carpio]	XM_016529303.1	2e-111	195/209(93.30)	348	PREDICTED: Sinocyclocheilus rhinocerous cell division cycle-associated protein 4-like (LOC107721340), mRNA	sp|Q14140|SRTD2_HUMAN	2.8e-17	99/315(31.43)	90	SERTA domain-containing protein 2 OS=Homo sapiens GN=SERTAD2 PE=2 SV=1
CAFS_CC_T_00184997	4	GO:0005509: calcium ion binding (molecular_function); GO:0033268: node of Ranvier (cellular_component); GO:0033270: paranode region of axon (cellular_component); GO:0045162: clustering of voltage-gated sodium channels (biological_process);	K06114|SPTA	http://www.genome.jp/dbget-bin/www_bget?ko:K06114	[Z]	Cytoskeleton	gi|1020415612|ref|XP_016126650.1|	0	2458/2507(98.05)	4713	PREDICTED: spectrin alpha chain, non-erythrocytic 1 isoform X1 [Sinocyclocheilus grahami]	XM_016271165.1	0	2458/2507(98.05)	4855	PREDICTED: Sinocyclocheilus grahami spectrin alpha, non-erythrocytic 1 (sptan1), transcript variant X2, mRNA	sp|P07751|SPTA2_CHICK	0	2217/2501(88.64)	4272	Spectrin alpha chain, brain OS=Gallus gallus GN=SPTAN1 PE=1 SV=3
CAFS_CC_T_00187208	--	--	K10409|DNAI1	http://www.genome.jp/dbget-bin/www_bget?ko:K10409	[Z]	Cytoskeleton	gi|966709847|gb|KTG42085.1|	1.1e-288	489/489(100.00)	998	hypothetical protein cypCar_00010527 [Cyprinus carpio]	XM_016512534.1	0	469/489(95.91)	981	PREDICTED: Sinocyclocheilus rhinocerous dynein intermediate chain 1, axonemal-like (LOC107708341), mRNA	sp|Q16959|DYI2_ANTCR	1.3e-137	252/489(51.53)	491	Dynein intermediate chain 2, ciliary OS=Anthocidaris crassispina PE=2 SV=1
CAFS_CC_T_00187327	--	--	--	--	--	--	gi|1025237979|ref|XP_016365644.1|	5.9e-88	185/249(74.30)	330	PREDICTED: uncharacterized protein LOC107706450 [Sinocyclocheilus rhinocerous]	XM_016510158.1	7e-98	190/249(76.31)	300	PREDICTED: Sinocyclocheilus rhinocerous uncharacterized LOC107706450 (LOC107706450), mRNA	--	--	--	--	--
CAFS_CC_T_00187831	--	--	--	--	--	--	gi|966710654|gb|KTG42892.1|	2.7e-09	36/41(87.80)	68	hypothetical protein cypCar_00016985 [Cyprinus carpio]	LN598284.1	5e-96	150/150(100.00)	312	Cyprinus carpio genome assembly common carp genome ,scaffold 000000351	--	--	--	--	--
CAFS_CC_T_00191234	29	GO:0000122: negative regulation of transcription from RNA polymerase II promoter (biological_process); GO:0000791: euchromatin (cellular_component); GO:0001889: liver development (biological_process); GO:0002088: lens development in camera-type eye (biological_process); GO:0005657: replication fork (cellular_component); GO:0005720: nuclear heterochromatin (cellular_component); GO:0005737: cytopla…	K10638|UHRF1, NP95	http://www.genome.jp/dbget-bin/www_bget?ko:K10638	--	--	gi|1024967349|ref|XP_016304948.1|	0	735/787(93.39)	1345	PREDICTED: E3 ubiquitin-protein ligase UHRF1 [Sinocyclocheilus anshuiensis]	XM_016449462.1	0	752/787(95.55)	1415	PREDICTED: Sinocyclocheilus anshuiensis ubiquitin like with PHD and ring finger domains 1 (uhrf1), mRNA	sp|Q96T88|UHRF1_HUMAN	7.5e-289	511/805(63.48)	994	E3 ubiquitin-protein ligase UHRF1 OS=Homo sapiens GN=UHRF1 PE=1 SV=1
CAFS_CC_T_00192225	8	GO:0003723: RNA binding (molecular_function); GO:0004000: adenosine deaminase activity (molecular_function); GO:0006396: RNA processing (biological_process); GO:0007399: nervous system development (biological_process); GO:0014032: neural crest cell development (biological_process); GO:0048701: embryonic cranial skeleton morphogenesis (biological_process); GO:0048899: anterior lateral line develop…	K13194|ADARB	http://www.genome.jp/dbget-bin/www_bget?ko:K13194	[A]	RNA processing and modification	gi|966707706|gb|KTG39946.1|	0	716/716(100.00)	1390	hypothetical protein cypCar_00029559 [Cyprinus carpio]	XM_016274542.1	0	716/759(94.33)	1340	PREDICTED: Sinocyclocheilus grahami double-stranded RNA-specific editase 1-like (LOC107586961), transcript variant X4, mRNA	sp|Q91ZS8|RED1_MOUSE	3.7e-283	512/723(70.82)	975	Double-stranded RNA-specific editase 1 OS=Mus musculus GN=Adarb1 PE=2 SV=1
CAFS_CC_T_00241016	2	GO:0004252: serine-type endopeptidase activity (molecular_function); GO:0006508: proteolysis (biological_process);	--	--	--	--	gi|966643037|gb|KTF77949.1|	4.2e-187	371/371(100.00)	660	hypothetical protein cypCar_00038610 [Cyprinus carpio]	XM_016531524.1	0	355/371(95.69)	641	PREDICTED: Sinocyclocheilus rhinocerous inactive serine protease 35-like (LOC107723021), mRNA	sp|Q5R212|PRS35_RAT	4.4e-104	201/368(54.62)	379	Inactive serine protease 35 OS=Rattus norvegicus GN=Prss35 PE=2 SV=1
CAFS_CC_T_00213056	--	--	--	--	--	--	gi|1024940760|ref|XP_016359496.1|	2.2e-22	72/88(81.82)	113	PREDICTED: zinc finger protein 239-like [Sinocyclocheilus anshuiensis]	LN591136.1	0	412/414(99.52)	798	Cyprinus carpio genome assembly common carp genome ,scaffold 000028846	--	--	--	--	--
CAFS_CC_T_00218705	8	GO:0001992: regulation of systemic arterial blood pressure by vasopressin (biological_process); GO:0005000: vasopressin receptor activity (molecular_function); GO:0005887: integral component of plasma membrane (cellular_component); GO:0007186: G-protein coupled receptor signaling pathway (biological_process); GO:0032870: cellular response to hormone stimulus (biological_process); GO:0042277: pept…	K04228|AVPR2	http://www.genome.jp/dbget-bin/www_bget?ko:K04228	[R]	General function prediction only	gi|1020396482|ref|XP_016134377.1|	3.2e-166	299/308(97.08)	590	PREDICTED: vasopressin V2 receptor-like [Sinocyclocheilus grahami]	XM_016278891.1	0	299/308(97.08)	562	PREDICTED: Sinocyclocheilus grahami vasopressin V2 receptor-like (LOC107590222), mRNA	sp|Q90352|AVT_CATCO	4.6e-72	148/308(48.05)	272	[Arg8]-vasotocin receptor OS=Catostomus commersonii PE=2 SV=1
CAFS_CC_T_00088208	5	GO:0008093: cytoskeletal adaptor activity (molecular_function); GO:0030507: spectrin binding (molecular_function); GO:0043034: costamere (cellular_component); GO:0072661: protein targeting to plasma membrane (biological_process); GO:0098910: regulation of atrial cardiac muscle cell action potential (biological_process);	K10380|ANK	http://www.genome.jp/dbget-bin/www_bget?ko:K10380	[M]	Cell wall/membrane/envelope biogenesis	gi|1025400425|ref|XP_016407777.1|	0	1120/1183(94.67)	2196	PREDICTED: ankyrin-1-like [Sinocyclocheilus rhinocerous]	XM_016451920.1	0	1903/1992(95.53)	3712	PREDICTED: Sinocyclocheilus anshuiensis ankyrin-1-like (LOC107662058), transcript variant X1, mRNA	sp|P16157|ANK1_HUMAN	0	673/1161(57.97)	1193	Ankyrin-1 OS=Homo sapiens GN=ANK1 PE=1 SV=3
CAFS_CC_T_00229686	12	GO:0000266: mitochondrial fission (biological_process); GO:0003374: dynamin family protein polymerization involved in mitochondrial fission (biological_process); GO:0003924: GTPase activity (molecular_function); GO:0005525: GTP binding (molecular_function); GO:0005743: mitochondrial inner membrane (cellular_component); GO:0005758: mitochondrial intermembrane space (cellular_component); GO:0006915…	K17079|OPA1	http://www.genome.jp/dbget-bin/www_bget?ko:K17079	[R]	General function prediction only	gi|1020417307|ref|XP_016127564.1|	0	1002/1034(96.91)	1764	PREDICTED: dynamin-like 120 kDa protein, mitochondrial isoform X1 [Sinocyclocheilus grahami]	XM_016268704.1	0	1007/1034(97.39)	1889	PREDICTED: Sinocyclocheilus grahami dynamin-like 120 kDa protein, mitochondrial (LOC107582739), transcript variant X1, mRNA	sp|Q5U3A7|OPA1_DANRE	0	919/1034(88.88)	1703	Dynamin-like 120 kDa protein, mitochondrial OS=Danio rerio GN=opa1 PE=2 SV=1
CAFS_CC_T_00236919	--	--	K16059|STIM	http://www.genome.jp/dbget-bin/www_bget?ko:K16059	[R]	General function prediction only	gi|1024971638|ref|XP_016307259.1|	0	636/673(94.50)	1171	PREDICTED: stromal interaction molecule 2-like [Sinocyclocheilus anshuiensis]	XM_016289060.1	0	640/657(97.41)	1267	PREDICTED: Sinocyclocheilus grahami stromal interaction molecule 2 (stim2), mRNA	sp|P83093|STIM2_MOUSE	4.5e-205	415/708(58.62)	715	Stromal interaction molecule 2 OS=Mus musculus GN=Stim2 PE=1 SV=2
CAFS_CC_T_00238556	7	GO:0001642: group III metabotropic glutamate receptor activity (molecular_function); GO:0005246: calcium channel regulator activity (molecular_function); GO:0005887: integral component of plasma membrane (cellular_component); GO:0007196: adenylate cyclase-inhibiting G-protein coupled glutamate receptor signaling pathway (biological_process); GO:0042734: presynaptic membrane (cellular_component); …	K04608|GRM6_7_8	http://www.genome.jp/dbget-bin/www_bget?ko:K04608	[PT]	--	gi|1020487758|ref|XP_016149543.1|	0	893/908(98.35)	1788	PREDICTED: metabotropic glutamate receptor 6-like [Sinocyclocheilus grahami]	XM_016294057.1	0	894/908(98.46)	1795	PREDICTED: Sinocyclocheilus grahami metabotropic glutamate receptor 6-like (LOC107601768), mRNA	sp|O00222|GRM8_HUMAN	0	648/866(74.83)	1325	Metabotropic glutamate receptor 8 OS=Homo sapiens GN=GRM8 PE=2 SV=2
CAFS_CC_T_00239824	3	GO:0004674: protein serine/threonine kinase activity (molecular_function); GO:0005524: ATP binding (molecular_function); GO:0006468: protein phosphorylation (biological_process);	K08269|ULK1_2_3, ATG1	http://www.genome.jp/dbget-bin/www_bget?ko:K08269	[OUT]	--	gi|1024965830|ref|XP_016304124.1|	0	892/972(91.77)	1600	PREDICTED: serine/threonine-protein kinase ULK1-like [Sinocyclocheilus anshuiensis]	XM_016448638.1	0	887/972(91.26)	1677	PREDICTED: Sinocyclocheilus anshuiensis serine/threonine-protein kinase ULK1-like (LOC107659619), mRNA	sp|O75385|ULK1_HUMAN	7.8e-219	510/1072(47.57)	761	Serine/threonine-protein kinase ULK1 OS=Homo sapiens GN=ULK1 PE=1 SV=1
CAFS_CC_T_00243056	8	GO:0000165: MAPK cascade (biological_process); GO:0000166: nucleotide binding (molecular_function); GO:0004672: protein kinase activity (molecular_function); GO:0005634: nucleus (cellular_component); GO:0006355: regulation of transcription, DNA-templated (biological_process); GO:0042127: regulation of cell proliferation (biological_process); GO:0048538: thymus development (biological_process); GO…	--	--	--	--	gi|966669415|gb|KTG02796.1|	1.7e-194	377/410(91.95)	684	hypothetical protein cypCar_00016780 [Cyprinus carpio]	XM_016445416.1	0	349/395(88.35)	599	PREDICTED: Sinocyclocheilus anshuiensis cell division cycle-associated protein 7-like (LOC107657370), transcript variant X2, mRNA	sp|Q9BWT1|CDCA7_HUMAN	5e-90	192/405(47.41)	332	Cell division cycle-associated protein 7 OS=Homo sapiens GN=CDCA7 PE=2 SV=1
CAFS_CC_T_00209901	--	--	--	--	--	--	gi|966653408|gb|KTF88310.1|	3.9e-66	114/119(95.80)	256	hypothetical protein cypCar_00043882, partial [Cyprinus carpio]	XM_016476539.1	6e-44	71/118(60.17)	151	PREDICTED: Sinocyclocheilus anshuiensis galactose-specific lectin nattectin-like (LOC107680599), transcript variant X1, mRNA	sp|Q66S03|NATTE_THANI	1.7e-21	47/115(40.87)	103	Nattectin OS=Thalassophryne nattereri PE=2 SV=1
CAFS_CC_T_00206048	--	--	--	--	--	--	gi|1025296057|ref|XP_016379932.1|	5.3e-197	400/450(88.89)	693	PREDICTED: protein NLRC3-like, partial [Sinocyclocheilus rhinocerous]	XM_016524446.1	0	391/452(86.50)	681	PREDICTED: Sinocyclocheilus rhinocerous protein NLRC3-like (LOC107717634), partial mRNA	sp|Q5DU56|NLRC3_MOUSE	2.9e-30	91/323(28.17)	134	Protein NLRC3 OS=Mus musculus GN=Nlrc3 PE=2 SV=2
CAFS_CC_T_00225694	8	GO:0003779: actin binding (molecular_function); GO:0005765: lysosomal membrane (cellular_component); GO:0005768: endosome (cellular_component); GO:0006886: intracellular protein transport (biological_process); GO:0016197: endosomal transport (biological_process); GO:0030897: HOPS complex (cellular_component); GO:0032889: regulation of vacuole fusion, non-autophagic (biological_process); GO:003554…	--	--	[U]	Intracellular trafficking, secretion, and vesicular transport	gi|1025239125|ref|XP_016365949.1|	0	812/835(97.25)	1625	PREDICTED: vacuolar protein sorting-associated protein 16 homolog [Sinocyclocheilus rhinocerous]	XM_016510463.1	0	812/835(97.25)	1690	PREDICTED: Sinocyclocheilus rhinocerous vacuolar protein sorting-associated protein 16 homolog (LOC107706675), mRNA	sp|Q9H269|VPS16_HUMAN	0	555/835(66.47)	1138	Vacuolar protein sorting-associated protein 16 homolog OS=Homo sapiens GN=VPS16 PE=1 SV=2
CAFS_CC_T_00049781	--	--	--	--	--	--	gi|1020476646|ref|XP_016143618.1|	4.1e-147	249/285(87.37)	526	PREDICTED: uncharacterized protein LOC107597178 [Sinocyclocheilus grahami]	XM_016288132.1	3e-178	249/285(87.37)	523	PREDICTED: Sinocyclocheilus grahami uncharacterized LOC107597178 (LOC107597178), mRNA	--	--	--	--	--
CAFS_CC_T_00051229	7	GO:0004970: ionotropic glutamate receptor activity (molecular_function); GO:0005234: extracellular-glutamate-gated ion channel activity (molecular_function); GO:0016021: integral component of membrane (cellular_component); GO:0030054: cell junction (cellular_component); GO:0034220: ion transmembrane transport (biological_process); GO:0035235: ionotropic glutamate receptor signaling pathway (biolo…	K05202|GRIK2	http://www.genome.jp/dbget-bin/www_bget?ko:K05202	[PET]	--	gi|1020557194|ref|XP_016110904.1|	6.6e-52	100/100(100.00)	209	PREDICTED: glutamate receptor ionotropic, kainate 2-like, partial [Sinocyclocheilus grahami]	XM_016520240.1	5e-69	100/100(100.00)	214	PREDICTED: Sinocyclocheilus rhinocerous glutamate receptor ionotropic, kainate 2-like (LOC107714404), mRNA	sp|Q13002|GRIK2_HUMAN	2.2e-52	98/100(98.00)	205	Glutamate receptor, ionotropic kainate 2 OS=Homo sapiens GN=GRIK2 PE=1 SV=1
CAFS_CC_T_00056807	3	GO:0003677: DNA binding (molecular_function); GO:0006338: chromatin remodeling (biological_process); GO:0090544: BAF-type complex (cellular_component);	K11653|ARID1	http://www.genome.jp/dbget-bin/www_bget?ko:K11653	[B]	Chromatin structure and dynamics	gi|966640205|gb|KTF75119.1|	0	1516/1604(94.51)	2575	hypothetical protein cypCar_00020966, partial [Cyprinus carpio]	XM_016555237.1	0	1525/1613(94.54)	2589	PREDICTED: Sinocyclocheilus rhinocerous AT-rich interactive domain-containing protein 1B-like (LOC107742311), mRNA	sp|Q8NFD5|ARI1B_HUMAN	1.0e-311	766/1660(46.14)	1071	AT-rich interactive domain-containing protein 1B OS=Homo sapiens GN=ARID1B PE=1 SV=2
CAFS_CC_T_00005128	--	--	--	--	--	--	gi|831501818|ref|XP_012710925.1|	1.2e-54	144/367(39.24)	219	PREDICTED: uncharacterized protein LOC105919987 [Fundulus heteroclitus]	LN594162.1	0	299/309(96.76)	603	Cyprinus carpio genome assembly common carp genome ,scaffold 000001981	--	--	--	--	--
CAFS_CC_T_00008190	--	--	--	--	--	--	--	--	--	--	--	LN590686.1	1e-48	101/101(100.00)	174	Cyprinus carpio genome assembly common carp genome, scaffold: LG35, chromosome: 35	--	--	--	--	--
CAFS_CC_T_00014614	--	--	--	--	--	--	gi|1025306473|ref|XP_016382783.1|	3e-07	33/76(43.42)	63	PREDICTED: dynein heavy chain 2, axonemal [Sinocyclocheilus rhinocerous]	LN593097.1	4e-173	272/277(98.19)	551	Cyprinus carpio genome assembly common carp genome ,scaffold 000001424	--	--	--	--	--
CAFS_CC_T_00014738	6	GO:0000149: SNARE binding (molecular_function); GO:0000323: lytic vacuole (cellular_component); GO:0005768: endosome (cellular_component); GO:0010508: positive regulation of autophagy (biological_process); GO:0035493: SNARE complex assembly (biological_process); GO:0060627: regulation of vesicle-mediated transport (biological_process);	--	--	[R]	General function prediction only	gi|1025075390|ref|XP_016338471.1|	2.6e-188	351/408(86.03)	664	PREDICTED: UV radiation resistance-associated gene protein-like [Sinocyclocheilus anshuiensis]	XM_016561350.1	0	388/408(95.10)	790	PREDICTED: Sinocyclocheilus rhinocerous UV radiation resistance associated (uvrag), mRNA	sp|Q9P2Y5|UVRAG_HUMAN	2.2e-139	262/389(67.35)	496	UV radiation resistance-associated gene protein OS=Homo sapiens GN=UVRAG PE=1 SV=1
CAFS_CC_T_00019285	--	--	K16882|PCLO	http://www.genome.jp/dbget-bin/www_bget?ko:K16882	--	--	gi|1020410133|ref|XP_016123696.1|	4.3e-39	121/171(70.76)	167	PREDICTED: protein bassoon-like [Sinocyclocheilus grahami]	LN594483.1	5e-66	170/170(100.00)	228	Cyprinus carpio genome assembly common carp genome ,scaffold 000000925	sp|Q9JKS6|PCLO_RAT	4.8e-14	31/45(68.89)	79	Protein piccolo OS=Rattus norvegicus GN=Pclo PE=1 SV=1
CAFS_CC_T_00024234	4	GO:0005739: mitochondrion (cellular_component); GO:0005769: early endosome (cellular_component); GO:0017137: Rab GTPase binding (molecular_function); GO:0045055: regulated exocytosis (biological_process);	K12484|RAB11FIP1_2_5	http://www.genome.jp/dbget-bin/www_bget?ko:K12484	--	--	gi|1025047412|ref|XP_016329394.1|	0	1016/1174(86.54)	1933	PREDICTED: uncharacterized protein LOC107678584 isoform X1 [Sinocyclocheilus anshuiensis]	XM_016473908.1	0	1016/1174(86.54)	1924	PREDICTED: Sinocyclocheilus anshuiensis uncharacterized LOC107678584 (LOC107678584), transcript variant X1, mRNA	sp|Q9BXF6|RFIP5_HUMAN	3.3e-11	63/161(39.13)	72	Rab11 family-interacting protein 5 OS=Homo sapiens GN=RAB11FIP5 PE=1 SV=1
CAFS_CC_T_00028779	12	GO:0003729: mRNA binding (molecular_function); GO:0005634: nucleus (cellular_component); GO:0005737: cytoplasm (cellular_component); GO:0005844: polysome (cellular_component); GO:0007420: brain development (biological_process); GO:0014036: neural crest cell fate specification (biological_process); GO:0017148: negative regulation of translation (biological_process); GO:0021905: forebrain-midbrain …	K15516|FMR	http://www.genome.jp/dbget-bin/www_bget?ko:K15516	--	--	gi|1024945622|ref|XP_016361850.1|	4.5e-107	219/237(92.41)	393	PREDICTED: fragile X mental retardation protein 1 homolog A-like [Sinocyclocheilus anshuiensis]	XM_016241194.1	3e-105	228/237(96.20)	332	PREDICTED: Sinocyclocheilus grahami fragile X mental retardation 1 (fmr1), transcript variant X1, mRNA	sp|P51113|FMR1A_XENLA	1.9e-49	136/238(57.14)	197	Fragile X mental retardation protein 1 homolog A OS=Xenopus laevis GN=fmr1-a PE=1 SV=1
CAFS_CC_T_00032018	4	GO:0005634: nucleus (cellular_component); GO:0006355: regulation of transcription, DNA-templated (biological_process); GO:0043565: sequence-specific DNA binding (molecular_function); GO:0055001: muscle cell development (biological_process);	K09353|LBX	http://www.genome.jp/dbget-bin/www_bget?ko:K09353	[R]	General function prediction only	gi|55742166|ref|NP_001007135.1|	1e-133	253/257(98.44)	482	transcription factor LBX2 [Danio rerio]	AJ295165.1	2e-154	236/243(97.12)	438	Danio rerio mRNA for homeo box containing protein (lbx gene)	sp|Q0P4H6|LBX1_XENTR	6.3e-75	162/253(64.03)	282	Transcription factor LBX1 OS=Xenopus tropicalis GN=lbx1 PE=2 SV=1
CAFS_CC_T_00048355	4	GO:0005201: extracellular matrix structural constituent (molecular_function); GO:0005578: proteinaceous extracellular matrix (cellular_component); GO:0005581: collagen trimer (cellular_component); GO:0009612: response to mechanical stimulus (biological_process);	K06236|COL1AS	http://www.genome.jp/dbget-bin/www_bget?ko:K06236	[W]	Extracellular structures	gi|966638473|gb|KTF73577.1|	1.5e-102	179/179(100.00)	380	hypothetical protein cypCar_00045321, partial [Cyprinus carpio]	XM_016280780.1	1e-151	366/375(97.60)	503	PREDICTED: Sinocyclocheilus grahami collagen alpha-2(I) chain-like (LOC107591591), mRNA	sp|O93484|CO1A2_ONCMY	1.4e-95	162/179(90.50)	352	Collagen alpha-2(I) chain OS=Oncorhynchus mykiss GN=col1a2 PE=2 SV=2
CAFS_CC_T_00058998	--	--	--	--	--	--	gi|1025144660|ref|XP_016415437.1|	5.4e-30	86/148(58.11)	136	PREDICTED: golgin subfamily A member 6-like protein 2 isoform X1 [Sinocyclocheilus rhinocerous]	LN591785.1	8e-32	81/153(52.94)	127	Cyprinus carpio genome assembly common carp genome ,scaffold 000028912	--	--	--	--	--
CAFS_CC_T_00064109	4	GO:0001075: transcription factor activity, RNA polymerase II core promoter sequence-specific binding involved in preinitiation complex assembly (molecular_function); GO:0005634: nucleus (cellular_component); GO:0005667: transcription factor complex (cellular_component); GO:0048839: inner ear development (biological_process);	--	--	[K]	Transcription	gi|1020422664|ref|XP_016130423.1|	9.8e-105	285/313(91.05)	386	PREDICTED: dachshund homolog 2 isoform X2 [Sinocyclocheilus grahami]	XM_016274937.1	3e-154	270/288(93.75)	454	PREDICTED: Sinocyclocheilus grahami dachshund family transcription factor 2 (dach2), transcript variant X2, mRNA	sp|Q925Q8|DACH2_MOUSE	3.4e-49	198/308(64.29)	196	Dachshund homolog 2 OS=Mus musculus GN=Dach2 PE=1 SV=1
CAFS_CC_T_00065884	4	GO:0005085: guanyl-nucleotide exchange factor activity (molecular_function); GO:0005622: intracellular (cellular_component); GO:0007264: small GTPase mediated signal transduction (biological_process); GO:0043547: positive regulation of GTPase activity (biological_process);	K08020|RAPGEF6, PDZGEF2	http://www.genome.jp/dbget-bin/www_bget?ko:K08020	[T]	Signal transduction mechanisms	gi|1025109006|ref|XP_016347672.1|	0	1364/1474(92.54)	2580	PREDICTED: rap guanine nucleotide exchange factor 6-like isoform X6 [Sinocyclocheilus anshuiensis]	XM_016492186.1	0	1352/1474(91.72)	2505	PREDICTED: Sinocyclocheilus anshuiensis rap guanine nucleotide exchange factor 6-like (LOC107692966), transcript variant X6, mRNA	sp|Q8TEU7|RPGF6_HUMAN	0	989/1485(66.60)	1753	Rap guanine nucleotide exchange factor 6 OS=Homo sapiens GN=RAPGEF6 PE=1 SV=1
CAFS_CC_T_00075533	--	--	--	--	--	--	gi|966709884|gb|KTG42122.1|	0	1564/1576(99.24)	2962	hypothetical protein cypCar_00012115 [Cyprinus carpio]	XM_016495323.1	0	1542/1712(90.07)	2911	PREDICTED: Sinocyclocheilus anshuiensis xin actin-binding repeat-containing protein 1-like (LOC107695422), mRNA	sp|Q5PZ43|XIRP1_DANRE	1.4e-77	281/782(35.93)	293	Xin actin-binding repeat-containing protein 1 OS=Danio rerio GN=xirp1 PE=1 SV=1
CAFS_CC_T_00075829	9	GO:0005125: cytokine activity (molecular_function); GO:0005576: extracellular region (cellular_component); GO:0006952: defense response (biological_process); GO:0006955: immune response (biological_process); GO:0007165: signal transduction (biological_process); GO:0030595: leukocyte chemotaxis (biological_process); GO:0042379: chemokine receptor binding (molecular_function); GO:0071345: cellular …	K14625|CCL20	http://www.genome.jp/dbget-bin/www_bget?ko:K14625	--	--	gi|1025363428|ref|XP_016395772.1|	2e-47	98/117(83.76)	194	PREDICTED: monocyte chemotactic protein 1B-like [Sinocyclocheilus rhinocerous]	XM_016540286.1	6e-43	84/101(83.17)	147	PREDICTED: Sinocyclocheilus rhinocerous monocyte chemotactic protein 1B-like (LOC107729649), mRNA	--	--	--	--	--
CAFS_CC_T_00077660	19	GO:0001517: N-acetylglucosamine 6-O-sulfotransferase activity (molecular_function); GO:0001537: N-acetylgalactosamine 4-O-sulfotransferase activity (molecular_function); GO:0004394: heparan sulfate 2-O-sulfotransferase activity (molecular_function); GO:0015015: heparan sulfate proteoglycan biosynthetic process, enzymatic modification (biological_process); GO:0016021: integral component of membran…	K02514|HS6ST1	http://www.genome.jp/dbget-bin/www_bget?ko:K02514	[MG]	--	gi|1025218542|ref|XP_016430738.1|	9.1e-146	249/257(96.89)	522	PREDICTED: heparan-sulfate 6-O-sulfotransferase 1-B-like [Sinocyclocheilus rhinocerous]	XM_016575252.1	0	249/257(96.89)	524	PREDICTED: Sinocyclocheilus rhinocerous heparan-sulfate 6-O-sulfotransferase 1-B-like (LOC107757697), mRNA	sp|A0MGZ5|H6S1B_DANRE	6e-134	231/249(92.77)	478	Heparan-sulfate 6-O-sulfotransferase 1-B OS=Danio rerio GN=hs6st1b PE=2 SV=3
CAFS_CC_T_00089123	1	GO:0016021: integral component of membrane (cellular_component);	--	--	--	--	gi|1020414303|ref|XP_016125947.1|	5.5e-180	306/330(92.73)	636	PREDICTED: transmembrane protein 229A-like [Sinocyclocheilus grahami]	LN590694.1	0	323/325(99.38)	666	Cyprinus carpio genome assembly common carp genome, scaffold: LG43, chromosome: 43	sp|B9EJI9|T229A_MOUSE	5.8e-89	167/325(51.38)	328	Transmembrane protein 229A OS=Mus musculus GN=Tmem229a PE=2 SV=1
CAFS_CC_T_00102696	7	GO:0005887: integral component of plasma membrane (cellular_component); GO:0006814: sodium ion transport (biological_process); GO:0008519: ammonium transmembrane transporter activity (molecular_function); GO:0015695: organic cation transport (biological_process); GO:0016324: apical plasma membrane (cellular_component); GO:0019740: nitrogen utilization (biological_process); GO:0072488: ammonium tr…	K06580|SLC42A, RHAG, RHBG, RHCG	http://www.genome.jp/dbget-bin/www_bget?ko:K06580	[UR]	--	gi|1025320620|ref|XP_016386619.1|	1.3e-265	457/465(98.28)	921	PREDICTED: ammonium transporter Rh type C 1-like [Sinocyclocheilus rhinocerous]	XM_016531133.1	0	468/477(98.11)	887	PREDICTED: Sinocyclocheilus rhinocerous ammonium transporter Rh type C 1-like (LOC107722672), mRNA	sp|Q18PF5|RHCG1_TAKRU	8.9e-219	369/445(82.92)	760	Ammonium transporter Rh type C 1 OS=Takifugu rubripes GN=rhcg1 PE=2 SV=1
CAFS_CC_T_00115226	--	--	K09855|RASSF7_8	http://www.genome.jp/dbget-bin/www_bget?ko:K09855	[W]	Extracellular structures	gi|1025125651|ref|XP_016350635.1|	4.7e-225	426/480(88.75)	786	PREDICTED: ras association domain-containing protein 8-like [Sinocyclocheilus anshuiensis]	LN591151.1	0	437/445(98.20)	815	Cyprinus carpio genome assembly common carp genome ,scaffold 000028871	sp|Q8NHQ8|RASF8_HUMAN	7.9e-23	73/163(44.79)	109	Ras association domain-containing protein 8 OS=Homo sapiens GN=RASSF8 PE=1 SV=2
CAFS_CC_T_00116318	4	GO:0003677: DNA binding (molecular_function); GO:0005634: nucleus (cellular_component); GO:0006355: regulation of transcription, DNA-templated (biological_process); GO:0046872: metal ion binding (molecular_function);	K12497|EGR3	http://www.genome.jp/dbget-bin/www_bget?ko:K12497	[R]	General function prediction only	gi|1020526427|ref|XP_016102805.1|	6.4e-194	398/403(98.76)	682	PREDICTED: early growth response protein 3-like [Sinocyclocheilus grahami]	XM_016247319.1	0	384/387(99.22)	730	PREDICTED: Sinocyclocheilus grahami early growth response protein 3-like (LOC107562644), mRNA	sp|P43300|EGR3_MOUSE	5.7e-102	200/329(60.79)	372	Early growth response protein 3 OS=Mus musculus GN=Egr3 PE=2 SV=2
CAFS_CC_T_00119053	--	--	--	--	--	--	gi|966669251|gb|KTG02632.1|	1.3e-174	318/355(89.58)	618	hypothetical protein cypCar_00027167 [Cyprinus carpio]	XM_016529676.1	1e-178	279/355(78.59)	515	PREDICTED: Sinocyclocheilus rhinocerous cell surface glycoprotein CD200 receptor 1-A-like (LOC107721582), mRNA	--	--	--	--	--
CAFS_CC_T_00126554	--	--	--	--	[R]	General function prediction only	gi|966703894|gb|KTG36135.1|	2e-139	232/239(97.07)	501	hypothetical protein cypCar_00043932 [Cyprinus carpio]	XM_016460651.1	6e-133	181/239(75.73)	382	PREDICTED: Sinocyclocheilus anshuiensis microfibril-associated glycoprotein 4-like (LOC107668686), mRNA	sp|P55918|MFAP4_BOVIN	1.3e-61	120/239(50.21)	237	Microfibril-associated glycoprotein 4 OS=Bos taurus GN=MFAP4 PE=1 SV=2
CAFS_CC_T_00131509	--	--	--	--	--	--	--	--	--	--	--	LN590713.1	8e-52	112/112(100.00)	183	Cyprinus carpio genome assembly common carp genome, scaffold: LG20, chromosome: 20	--	--	--	--	--
CAFS_CC_T_00150110	--	--	--	--	--	--	--	--	--	--	--	LN598428.1	4e-15	65/105(61.90)	79	Cyprinus carpio genome assembly common carp genome ,scaffold 000000986	--	--	--	--	--
CAFS_CC_T_00158227	--	--	--	--	--	--	gi|966638857|gb|KTF73961.1|	0	675/675(100.00)	1201	hypothetical protein cypCar_00027238 [Cyprinus carpio]	LN590704.1	0	675/675(100.00)	1375	Cyprinus carpio genome assembly common carp genome, scaffold: LG14, chromosome: 14	--	--	--	--	--
CAFS_CC_T_00166066	--	--	--	--	--	--	gi|966668984|gb|KTG02365.1|	1.1e-105	231/247(93.52)	389	hypothetical protein cypCar_00032332 [Cyprinus carpio]	XM_016491531.1	2e-121	216/249(86.75)	356	PREDICTED: Sinocyclocheilus anshuiensis UPF0583 protein C15orf59 homolog (LOC107692472), transcript variant X3, mRNA	sp|Q1L899|CO059_DANRE	1.6e-56	150/234(64.10)	220	UPF0583 protein C15orf59 homolog OS=Danio rerio GN=si:dkey-105e17.1 PE=2 SV=1
CAFS_CC_T_00179594	--	--	--	--	--	--	gi|1025193835|ref|XP_016424118.1|	2.8e-42	90/101(89.11)	177	PREDICTED: paraneoplastic antigen Ma1 homolog, partial [Sinocyclocheilus rhinocerous]	LN598507.1	4e-62	101/101(100.00)	212	Cyprinus carpio genome assembly common carp genome ,scaffold 000000881	sp|A6QLK5|PNMA1_BOVIN	4.3e-19	44/101(43.56)	95	Paraneoplastic antigen Ma1 homolog OS=Bos taurus GN=PNMA1 PE=2 SV=1
CAFS_CC_T_00189765	2	GO:0004252: serine-type endopeptidase activity (molecular_function); GO:0006508: proteolysis (biological_process);	K01353|GZMB	http://www.genome.jp/dbget-bin/www_bget?ko:K01353	[E]	Amino acid transport and metabolism	gi|966672357|gb|KTG05738.1|	3.7e-136	230/231(99.57)	490	hypothetical protein cypCar_00033966, partial [Cyprinus carpio]	XM_016536161.1	2e-154	233/252(92.46)	439	PREDICTED: Sinocyclocheilus rhinocerous granzyme-like protein 1 (LOC107726539), mRNA	sp|Q06605|GRZ1_RAT	2.3e-37	93/251(37.05)	157	Granzyme-like protein 1 OS=Rattus norvegicus PE=2 SV=1
CAFS_CC_T_00192588	4	GO:0004945: angiotensin type II receptor activity (molecular_function); GO:0005887: integral component of plasma membrane (cellular_component); GO:0007200: phospholipase C-activating G-protein coupled receptor signaling pathway (biological_process); GO:0007218: neuropeptide signaling pathway (biological_process);	K08397|RXFP3, RLN3R1	http://www.genome.jp/dbget-bin/www_bget?ko:K08397	[R]	General function prediction only	gi|966657655|gb|KTF92509.1|	3.1e-217	394/400(98.50)	760	hypothetical protein cypCar_00005411 [Cyprinus carpio]	XM_016540388.1	0	392/400(98.00)	729	PREDICTED: Sinocyclocheilus rhinocerous relaxin-3 receptor 1-like (LOC107729713), mRNA	sp|Q9NSD7|RL3R1_HUMAN	7e-97	196/337(58.16)	355	Relaxin-3 receptor 1 OS=Homo sapiens GN=RXFP3 PE=1 SV=1
CAFS_CC_T_00192872	2	GO:0005319: lipid transporter activity (molecular_function); GO:0006869: lipid transport (biological_process);	--	--	[I]	Lipid transport and metabolism	gi|151558991|dbj|BAF73406.1|	0	1325/1366(97.00)	2399	vitellogenin B1 [Cyprinus carpio]	AB331884.1	0	1305/1345(97.03)	2441	Cyprinus carpio vg-B1 mRNA for vitellogenin B1, complete cds	sp|Q92093|VIT_ONCMY	0	788/1398(56.37)	1346	Vitellogenin OS=Oncorhynchus mykiss GN=vtg1 PE=1 SV=1
CAFS_CC_T_00199802	1	GO:0016020: membrane (cellular_component);	--	--	--	--	gi|966713318|gb|KTG45556.1|	0	559/592(94.43)	1115	hypothetical protein cypCar_00046437 [Cyprinus carpio]	XM_016492873.1	0	546/662(82.48)	1003	PREDICTED: Sinocyclocheilus anshuiensis dermatan-sulfate epimerase-like protein (LOC107693467), transcript variant X2, mRNA	sp|Q8IZU8|DSEL_HUMAN	1.7e-184	331/666(49.70)	647	Dermatan-sulfate epimerase-like protein OS=Homo sapiens GN=DSEL PE=2 SV=2
CAFS_CC_T_00198175	1	GO:0016021: integral component of membrane (cellular_component);	--	--	--	--	gi|966705478|gb|KTG37719.1|	1.2e-232	413/413(100.00)	811	hypothetical protein cypCar_00015411 [Cyprinus carpio]	XM_016276040.1	0	407/414(98.31)	815	PREDICTED: Sinocyclocheilus grahami solute carrier family 35 member G2-like (LOC107588046), transcript variant X1, mRNA	sp|Q5M7A3|TMM22_RAT	3e-167	300/415(72.29)	589	Transmembrane protein 22 OS=Rattus norvegicus GN=Tmem22 PE=2 SV=1
CAFS_CC_T_00206269	3	GO:0005783: endoplasmic reticulum (cellular_component); GO:0008289: lipid binding (molecular_function); GO:0016021: integral component of membrane (cellular_component);	--	--	[R]	General function prediction only	gi|966671465|gb|KTG04846.1|	0	1009/1011(99.80)	1892	hypothetical protein cypCar_00012427 [Cyprinus carpio]	XM_016504062.1	0	1020/1071(95.24)	1707	PREDICTED: Sinocyclocheilus anshuiensis testis expressed 2 (tex2), transcript variant X9, mRNA	sp|Q8IWB9|TEX2_HUMAN	1.8e-277	562/952(59.03)	956	Testis-expressed sequence 2 protein OS=Homo sapiens GN=TEX2 PE=1 SV=2
CAFS_CC_T_00222342	5	GO:0005044: scavenger receptor activity (molecular_function); GO:0006898: receptor-mediated endocytosis (biological_process); GO:0006955: immune response (biological_process); GO:0016021: integral component of membrane (cellular_component); GO:0030247: polysaccharide binding (molecular_function);	--	--	[W]	Extracellular structures	gi|1024958532|ref|XP_016300237.1|	0	748/830(90.12)	1515	PREDICTED: sushi domain-containing protein 2-like [Sinocyclocheilus anshuiensis]	XM_016444751.1	0	758/830(91.33)	1476	PREDICTED: Sinocyclocheilus anshuiensis sushi domain-containing protein 2-like (LOC107656804), mRNA	sp|Q9DBX3|SUSD2_MOUSE	9.1e-237	392/771(50.84)	821	Sushi domain-containing protein 2 OS=Mus musculus GN=Susd2 PE=1 SV=1
CAFS_CC_T_00223492	--	--	--	--	--	--	--	--	--	--	--	LN596215.1	1e-27	62/99(62.63)	114	Cyprinus carpio genome assembly common carp genome ,scaffold 000007379	--	--	--	--	--
CAFS_CC_T_00238045	4	GO:0003677: DNA binding (molecular_function); GO:0006313: transposition, DNA-mediated (biological_process); GO:0015074: DNA integration (biological_process); GO:0016491: oxidoreductase activity (molecular_function);	K16799|CI	http://www.genome.jp/dbget-bin/www_bget?ko:K16799	--	--	gi|226372474|gb|ACO51862.1|	1.1e-38	75/100(75.00)	165	Transposable element Tc1 transposase [Rana catesbeiana]	LN590692.1	2e-79	126/126(100.00)	263	Cyprinus carpio genome assembly common carp genome, scaffold: LG33, chromosome: 33	sp|P35072|TCB1_CAEBR	7.5e-21	44/100(44.00)	101	Transposable element Tcb1 transposase OS=Caenorhabditis briggsae PE=3 SV=1
CAFS_CC_T_00240418	--	--	--	--	--	--	gi|831301535|ref|XP_012682773.1|	1.7e-06	23/46(50.00)	59	PREDICTED: uncharacterized protein LOC105900069 [Clupea harengus]	LN593313.1	3e-97	168/169(99.41)	321	Cyprinus carpio genome assembly common carp genome ,scaffold 000010461	--	--	--	--	--
CAFS_CC_T_00240175	3	GO:0005779: integral component of peroxisomal membrane (cellular_component); GO:0008270: zinc ion binding (molecular_function); GO:0016558: protein import into peroxisome matrix (biological_process);	K13346|PEX10	http://www.genome.jp/dbget-bin/www_bget?ko:K13346	[O]	Posttranslational modification, protein turnover, chaperones	gi|1020473243|ref|XP_016141816.1|	1.4e-172	299/316(94.62)	611	PREDICTED: peroxisome biogenesis factor 10 [Sinocyclocheilus grahami]	XM_016564030.1	0	299/317(94.32)	559	PREDICTED: Sinocyclocheilus rhinocerous peroxisome biogenesis factor 10-like (LOC107748993), mRNA	sp|B1AUE5|PEX10_MOUSE	2.9e-98	176/322(54.66)	359	Peroxisome biogenesis factor 10 OS=Mus musculus GN=Pex10 PE=2 SV=1
CAFS_CC_T_00243337	1	GO:0005507: copper ion binding (molecular_function);	K05810|yfiH	http://www.genome.jp/dbget-bin/www_bget?ko:K05810	--	--	gi|1020500947|ref|XP_016089264.1|	9.2e-228	389/425(91.53)	795	PREDICTED: laccase domain-containing protein 1-like [Sinocyclocheilus grahami]	XM_016233778.1	0	389/426(91.31)	786	PREDICTED: Sinocyclocheilus grahami laccase domain-containing protein 1-like (LOC107551973), mRNA	sp|Q8BZT9|CM031_MOUSE	5.9e-110	196/352(55.68)	399	UPF0124 protein C13orf31 homolog OS=Mus musculus PE=2 SV=1
CAFS_CC_T_00243587	12	GO:0001525: angiogenesis (biological_process); GO:0001570: vasculogenesis (biological_process); GO:0001755: neural crest cell migration (biological_process); GO:0005021: vascular endothelial growth factor-activated receptor activity (molecular_function); GO:0007411: axon guidance (biological_process); GO:0007413: axonal fasciculation (biological_process); GO:0016021: integral component of membran…	K06819|NRP2	http://www.genome.jp/dbget-bin/www_bget?ko:K06819	--	--	gi|1024991196|ref|XP_016315721.1|	0	886/920(96.30)	1845	PREDICTED: neuropilin-2-like [Sinocyclocheilus anshuiensis]	XM_016460235.1	0	886/920(96.30)	1769	PREDICTED: Sinocyclocheilus anshuiensis neuropilin-2-like (LOC107668386), mRNA	sp|O60462|NRP2_HUMAN	0	551/917(60.09)	1116	Neuropilin-2 OS=Homo sapiens GN=NRP2 PE=1 SV=2
CAFS_CC_T_00243648	1	GO:0016020: membrane (cellular_component);	--	--	--	--	gi|1025177390|ref|XP_016420615.1|	0	649/666(97.45)	1255	PREDICTED: thrombospondin-type laminin G domain and EAR repeat-containing protein-like [Sinocyclocheilus rhinocerous]	XM_016565129.1	0	649/666(97.45)	1294	PREDICTED: Sinocyclocheilus rhinocerous thrombospondin-type laminin G domain and EAR repeat-containing protein-like (LOC107749903), mRNA	sp|Q8WU66|TSEAR_HUMAN	3.1e-198	390/673(57.95)	693	Protein TSPEAR OS=Homo sapiens GN=TSPEAR PE=2 SV=2
CAFS_CC_T_00080267	6	GO:0001656: metanephros development (biological_process); GO:0005634: nucleus (cellular_component); GO:0006355: regulation of transcription, DNA-templated (biological_process); GO:0043565: sequence-specific DNA binding (molecular_function); GO:0060042: retina morphogenesis in camera-type eye (biological_process); GO:0072047: proximal/distal pattern formation involved in nephron development (biolo…	--	--	[K]	Transcription	gi|966711875|gb|KTG44113.1|	5.3e-202	404/424(95.28)	709	hypothetical protein cypCar_00047873, partial [Cyprinus carpio]	XM_016446112.1	0	402/443(90.74)	650	PREDICTED: Sinocyclocheilus anshuiensis iroquois homeobox 2 (irx2), mRNA	sp|Q66IK1|IRX2_XENTR	4.6e-126	290/454(63.88)	452	Iroquois-class homeodomain protein irx-2 OS=Xenopus tropicalis GN=irx2 PE=2 SV=1
CAFS_CC_T_00182813	6	GO:0003677: DNA binding (molecular_function); GO:0004386: helicase activity (molecular_function); GO:0005524: ATP binding (molecular_function); GO:0006260: DNA replication (biological_process); GO:0006974: cellular response to DNA damage stimulus (biological_process); GO:0007276: gamete generation (biological_process);	K10738|MCM9	http://www.genome.jp/dbget-bin/www_bget?ko:K10738	[L]	Replication, recombination and repair	gi|966657839|gb|KTF92693.1|	0	959/1081(88.71)	1818	hypothetical protein cypCar_00008112 [Cyprinus carpio]	XM_016474283.1	0	920/1064(86.47)	1752	PREDICTED: Sinocyclocheilus anshuiensis DNA helicase MCM9-like (LOC107678857), mRNA	sp|Q9NXL9|MCM9_HUMAN	1.3e-293	495/659(75.11)	1010	DNA replication licensing factor MCM9 OS=Homo sapiens GN=MCM9 PE=1 SV=3
CAFS_CC_T_00158773	--	--	K06252|TN	http://www.genome.jp/dbget-bin/www_bget?ko:K06252	[R]	General function prediction only	gi|1024973431|ref|XP_016308223.1|	0	1325/1711(77.44)	2106	PREDICTED: uncharacterized protein LOC107662658 [Sinocyclocheilus anshuiensis]	XM_016452737.1	0	1477/1709(86.42)	2714	PREDICTED: Sinocyclocheilus anshuiensis uncharacterized LOC107662658 (LOC107662658), mRNA	sp|P22105|TENX_HUMAN	8.4e-112	225/528(42.61)	407	Tenascin-X OS=Homo sapiens GN=TNXB PE=1 SV=3
CAFS_CC_T_00090984	--	--	--	--	--	--	--	--	--	--	--	LN597282.1	7e-31	62/65(95.38)	123	Cyprinus carpio genome assembly common carp genome ,scaffold 000003150	--	--	--	--	--
CAFS_CC_T_00136265	7	GO:0005737: cytoplasm (cellular_component); GO:0005886: plasma membrane (cellular_component); GO:0006508: proteolysis (biological_process); GO:0008270: zinc ion binding (molecular_function); GO:0042277: peptide binding (molecular_function); GO:0043171: peptide catabolic process (biological_process); GO:0070006: metalloaminopeptidase activity (molecular_function);	K08776|NPEPPS	http://www.genome.jp/dbget-bin/www_bget?ko:K08776	[EO]	--	gi|1025199291|ref|XP_016425597.1|	0	862/873(98.74)	1776	PREDICTED: puromycin-sensitive aminopeptidase [Sinocyclocheilus rhinocerous]	XM_016570111.1	0	859/870(98.74)	1745	PREDICTED: Sinocyclocheilus rhinocerous puromycin-sensitive aminopeptidase (LOC107753845), mRNA	sp|Q11011|PSA_MOUSE	0	744/872(85.32)	1562	Puromycin-sensitive aminopeptidase OS=Mus musculus GN=Npepps PE=1 SV=2
CAFS_CC_T_00167799	3	GO:0005096: GTPase activator activity (molecular_function); GO:0007165: signal transduction (biological_process); GO:0043547: positive regulation of GTPase activity (biological_process);	--	--	[T]	Signal transduction mechanisms	gi|1020528453|ref|XP_016103880.1|	4.4e-310	541/573(94.42)	1069	PREDICTED: rho GTPase-activating protein 42-like isoform X1 [Sinocyclocheilus grahami]	XM_016490764.1	0	541/571(94.75)	1056	PREDICTED: Sinocyclocheilus anshuiensis rho GTPase-activating protein 42-like (LOC107691914), transcript variant X1, mRNA	sp|A6NI28|RHG42_HUMAN	1.2e-227	406/561(72.37)	790	Rho GTPase-activating protein 42 OS=Homo sapiens GN=ARHGAP42 PE=1 SV=3
CAFS_CC_T_00032669	7	GO:0008033: tRNA processing (biological_process); GO:0010181: FMN binding (molecular_function); GO:0016021: integral component of membrane (cellular_component); GO:0016829: lyase activity (molecular_function); GO:0046872: metal ion binding (molecular_function); GO:0051539: 4 iron, 4 sulfur cluster binding (molecular_function); GO:0055114: oxidation-reduction process (biological_process);	K15449|TYW1	http://www.genome.jp/dbget-bin/www_bget?ko:K15449	[C]	Energy production and conversion	gi|1024966536|ref|XP_016304502.1|	2.8e-53	106/113(93.81)	214	PREDICTED: S-adenosyl-L-methionine-dependent tRNA 4-demethylwyosine synthase-like [Sinocyclocheilus anshuiensis]	XM_016449016.1	3e-64	106/113(93.81)	220	PREDICTED: Sinocyclocheilus anshuiensis S-adenosyl-L-methionine-dependent tRNA 4-demethylwyosine synthase-like (LOC107659914), mRNA	sp|Q08C92|TYW1_DANRE	4.3e-54	104/113(92.04)	212	tRNA wybutosine-synthesizing protein 1 homolog OS=Danio rerio GN=tyw1 PE=2 SV=1
CAFS_CC_T_00080489	7	GO:0005634: nucleus (cellular_component); GO:0005829: cytosol (cellular_component); GO:0006596: polyamine biosynthetic process (biological_process); GO:0008073: ornithine decarboxylase inhibitor activity (molecular_function); GO:0043086: negative regulation of catalytic activity (biological_process); GO:0045732: positive regulation of protein catabolic process (biological_process); GO:0090316: po…	K16613|OAZ2	http://www.genome.jp/dbget-bin/www_bget?ko:K16613	[E]	Amino acid transport and metabolism	gi|1020525668|ref|XP_016102398.1|	1.1e-109	191/205(93.17)	402	PREDICTED: LOW QUALITY PROTEIN: ornithine decarboxylase antizyme 2-like [Sinocyclocheilus grahami]	XM_016246912.1	2e-129	182/195(93.33)	385	PREDICTED: Sinocyclocheilus grahami ornithine decarboxylase antizyme 2-like (LOC107562289), mRNA	sp|O08608|OAZ2_MOUSE	4.4e-55	100/190(52.63)	215	Ornithine decarboxylase antizyme 2 OS=Mus musculus GN=Oaz2 PE=2 SV=2
CAFS_CC_T_00108472	--	--	K12804|PSTPIP1	http://www.genome.jp/dbget-bin/www_bget?ko:K12804	[D]	Cell cycle control, cell division, chromosome partitioning	gi|1024998959|ref|XP_016318924.1|	4.2e-179	312/392(79.59)	633	PREDICTED: CD209 antigen-like [Sinocyclocheilus anshuiensis]	XM_016463438.1	0	312/392(79.59)	605	PREDICTED: Sinocyclocheilus anshuiensis CD209 antigen-like (LOC107670725), mRNA	sp|P97814|PPIP1_MOUSE	5.9e-32	73/155(47.10)	139	Proline-serine-threonine phosphatase-interacting protein 1 OS=Mus musculus GN=Pstpip1 PE=1 SV=1
CAFS_CC_T_00110860	22	GO:0000183: chromatin silencing at rDNA (biological_process); GO:0000784: nuclear chromosome, telomeric region (cellular_component); GO:0000786: nucleosome (cellular_component); GO:0003677: DNA binding (molecular_function); GO:0005654: nucleoplasm (cellular_component); GO:0006303: double-strand break repair via nonhomologous end joining (biological_process); GO:0006335: DNA replication-dependent …	K11254|H4	http://www.genome.jp/dbget-bin/www_bget?ko:K11254	[B]	Chromatin structure and dynamics	gi|119575932|gb|EAW55528.1|	5.4e-49	103/103(100.00)	199	histone 1, H4c [Homo sapiens]	XM_007064034.1	5e-51	82/82(100.00)	164	PREDICTED: Chelonia mydas histone H4-like (LOC102934120), mRNA	sp|P62803|H4_BOVIN	1.6e-50	103/103(100.00)	199	Histone H4 OS=Bos taurus PE=1 SV=2
CAFS_CC_T_00110680	3	GO:0004842: ubiquitin-protein transferase activity (molecular_function); GO:0016567: protein ubiquitination (biological_process); GO:0016874: ligase activity (molecular_function);	K17849|HECTD4	http://www.genome.jp/dbget-bin/www_bget?ko:K17849	--	--	gi|1020496536|ref|XP_016086894.1|	0	1064/1148(92.68)	1959	PREDICTED: probable E3 ubiquitin-protein ligase HECTD4 [Sinocyclocheilus grahami]	XM_016231408.1	0	1052/1128(93.26)	1995	PREDICTED: Sinocyclocheilus grahami HECT domain E3 ubiquitin protein ligase 4 (hectd4), mRNA	sp|Q9Y4D8|K0614_HUMAN	0	901/1127(79.95)	1692	Probable E3 ubiquitin-protein ligase C12orf51 OS=Homo sapiens GN=C12orf51 PE=1 SV=5
CAFS_CC_T_00160217	3	GO:0004672: protein kinase activity (molecular_function); GO:0005524: ATP binding (molecular_function); GO:0006468: protein phosphorylation (biological_process);	K08794|CAMK1	http://www.genome.jp/dbget-bin/www_bget?ko:K08794	--	--	gi|1025085741|ref|XP_016341324.1|	9.2e-159	280/313(89.46)	566	PREDICTED: CBL-interacting protein kinase 24-like [Sinocyclocheilus anshuiensis]	XM_016574222.1	0	272/311(87.46)	529	PREDICTED: Sinocyclocheilus rhinocerous CBL-interacting protein kinase 24-like (LOC107756898), mRNA	sp|Q75L42|CIPKH_ORYSJ	7.2e-15	73/254(28.74)	83	CBL-interacting protein kinase 17 OS=Oryza sativa subsp. japonica GN=CIPK17 PE=2 SV=1
CAFS_CC_T_00171264	3	GO:0005488: binding (molecular_function); GO:0043170: macromolecule metabolic process (biological_process); GO:0044238: primary metabolic process (biological_process);	K06927|DPH6	http://www.genome.jp/dbget-bin/www_bget?ko:K06927	[R]	General function prediction only	gi|1025257040|ref|XP_016370811.1|	7.4e-76	138/192(71.88)	289	PREDICTED: uncharacterized protein LOC107710542 [Sinocyclocheilus rhinocerous]	LN590685.1	3e-125	192/192(100.00)	397	Cyprinus carpio genome assembly common carp genome, scaffold: LG16, chromosome: 16	sp|Q05654|RTF21_SCHPO	2.7e-38	79/192(41.15)	159	Retrotransposable element Tf2 155 kDa protein type 1 OS=Schizosaccharomyces pombe GN=Tf2-1 PE=2 SV=1
CAFS_CC_T_00222398	4	GO:0005524: ATP binding (molecular_function); GO:0005829: cytosol (cellular_component); GO:0006631: fatty acid metabolic process (biological_process); GO:0030729: acetoacetate-CoA ligase activity (molecular_function);	K01907|AACS, acsA	http://www.genome.jp/dbget-bin/www_bget?ko:K01907	[I]	Lipid transport and metabolism	gi|1020476990|ref|XP_016143806.1|	0	642/673(95.39)	1318	PREDICTED: acetoacetyl-CoA synthetase [Sinocyclocheilus grahami]	XM_016288320.1	0	642/673(95.39)	1306	PREDICTED: Sinocyclocheilus grahami acetoacetyl-CoA synthetase (aacs), mRNA	sp|A3QK15|AACS_DANRE	0	632/673(93.91)	1297	Acetoacetyl-CoA synthetase OS=Danio rerio GN=aacs PE=2 SV=1
CAFS_CC_T_00012391	--	--	--	--	--	--	--	--	--	--	--	LN590693.1	1e-46	91/112(81.25)	169	Cyprinus carpio genome assembly common carp genome, scaffold: LG3, chromosome: 3	--	--	--	--	--
CAFS_CC_T_00016181	1	GO:0016020: membrane (cellular_component);	K05462|EFNA	http://www.genome.jp/dbget-bin/www_bget?ko:K05462	[T]	Signal transduction mechanisms	gi|966713748|gb|KTG45986.1|	3.3e-94	158/159(99.37)	350	hypothetical protein cypCar_00027113, partial [Cyprinus carpio]	XM_016468581.1	2e-96	139/141(98.58)	295	PREDICTED: Sinocyclocheilus anshuiensis ephrin-A2-like (LOC107674568), transcript variant X1, mRNA	sp|P79727|EFNA2_DANRE	9.3e-65	116/156(74.36)	247	Ephrin-A2 OS=Danio rerio GN=efna2 PE=2 SV=1
CAFS_CC_T_00001728	--	--	--	--	--	--	--	--	--	--	--	LN590701.1	1e-52	102/102(100.00)	186	Cyprinus carpio genome assembly common carp genome, scaffold: LG1, chromosome: 1	--	--	--	--	--
CAFS_CC_T_00082181	2	GO:0003824: catalytic activity (molecular_function); GO:0008152: metabolic process (biological_process);	K00167|E1.2.4.4B, bkdA2	http://www.genome.jp/dbget-bin/www_bget?ko:K00167	[C]	Energy production and conversion	gi|1025337762|ref|XP_016391269.1|	5.2e-167	292/316(92.41)	593	PREDICTED: 2-oxoisovalerate dehydrogenase subunit beta, mitochondrial [Sinocyclocheilus rhinocerous]	XM_016535783.1	0	292/316(92.41)	558	PREDICTED: Sinocyclocheilus rhinocerous branched chain keto acid dehydrogenase E1, beta polypeptide (bckdhb), mRNA	sp|P21953|ODBB_HUMAN	2.8e-133	224/282(79.43)	476	2-oxoisovalerate dehydrogenase subunit beta, mitochondrial OS=Homo sapiens GN=BCKDHB PE=1 SV=2
CAFS_CC_T_00064845	2	GO:0007165: signal transduction (biological_process); GO:0016021: integral component of membrane (cellular_component);	K07521|UNC5	http://www.genome.jp/dbget-bin/www_bget?ko:K07521	[T]	Signal transduction mechanisms	gi|1025361736|ref|XP_016403772.1|	0	894/929(96.23)	1778	PREDICTED: netrin receptor UNC5D-like isoform X1 [Sinocyclocheilus rhinocerous]	XM_016484053.1	0	889/929(95.69)	1795	PREDICTED: Sinocyclocheilus anshuiensis netrin receptor UNC5D-like (LOC107686907), transcript variant X1, mRNA	sp|Q6UXZ4|UNC5D_HUMAN	0	584/898(65.03)	1194	Netrin receptor UNC5D OS=Homo sapiens GN=UNC5D PE=1 SV=1
CAFS_CC_T_00083504	8	GO:0002040: sprouting angiogenesis (biological_process); GO:0005623: cell (cellular_component); GO:0016936: galactoside binding (molecular_function); GO:0030246: carbohydrate binding (molecular_function); GO:0043236: laminin binding (molecular_function); GO:0048741: skeletal muscle fiber development (biological_process); GO:0050769: positive regulation of neurogenesis (biological_process); GO:009…	K06830|LGALS1	http://www.genome.jp/dbget-bin/www_bget?ko:K06830	[W]	Extracellular structures	gi|1025058757|ref|XP_016332442.1|	1e-68	126/132(95.45)	265	PREDICTED: beta-galactoside-binding lectin-like [Sinocyclocheilus anshuiensis]	XM_016476957.1	7e-90	126/132(95.45)	268	PREDICTED: Sinocyclocheilus anshuiensis beta-galactoside-binding lectin-like (LOC107680883), transcript variant X2, mRNA	sp|P08520|LEG_ELEEL	4.7e-42	83/132(62.88)	171	Beta-galactoside-binding lectin OS=Electrophorus electricus PE=1 SV=1
CAFS_CC_T_00162592	4	GO:0001664: G-protein coupled receptor binding (molecular_function); GO:0005737: cytoplasm (cellular_component); GO:0006629: lipid metabolic process (biological_process); GO:0008047: enzyme activator activity (molecular_function);	--	--	--	--	gi|966707168|gb|KTG39409.1|	2.9e-59	115/116(99.14)	233	hypothetical protein cypCar_00045827 [Cyprinus carpio]	XM_016546316.1	3e-48	74/102(72.55)	158	PREDICTED: Sinocyclocheilus rhinocerous antimicrobial peptide NK-lysin-like (LOC107734372), mRNA	--	--	--	--	--
CAFS_CC_T_00215239	10	GO:0005509: calcium ion binding (molecular_function); GO:0005544: calcium-dependent phospholipid binding (molecular_function); GO:0005886: plasma membrane (cellular_component); GO:0006906: vesicle fusion (biological_process); GO:0016021: integral component of membrane (cellular_component); GO:0017158: regulation of calcium ion-dependent exocytosis (biological_process); GO:0019905: syntaxin bindin…	--	--	[TU]	--	gi|1025136667|ref|XP_016413063.1|	3.5e-294	513/568(90.32)	1016	PREDICTED: synaptotagmin-10-like isoform X2 [Sinocyclocheilus rhinocerous]	XM_017355049.1	0	549/597(91.96)	1052	PREDICTED: Danio rerio synaptotagmin X (syt10), transcript variant X1, mRNA	sp|Q5RCK6|SYT10_PONAB	5.1e-221	390/535(72.90)	768	Synaptotagmin-10 OS=Pongo abelii GN=SYT10 PE=2 SV=1
CAFS_CC_T_00223693	3	GO:0016021: integral component of membrane (cellular_component); GO:0016337: single organismal cell-cell adhesion (biological_process); GO:0042802: identical protein binding (molecular_function);	--	--	--	--	gi|1020481544|ref|XP_016146248.1|	6.4e-32	88/111(79.28)	142	PREDICTED: myelin protein zero-like protein 2 isoform X1 [Sinocyclocheilus grahami]	XM_016453579.1	6e-31	89/111(80.18)	120	PREDICTED: Sinocyclocheilus anshuiensis myelin protein zero-like protein 2 (LOC107663371), mRNA	sp|O60487|MPZL2_HUMAN	1.7e-08	33/72(45.83)	60	Myelin protein zero-like protein 2 OS=Homo sapiens GN=MPZL2 PE=1 SV=1
CAFS_CC_T_00233616	9	GO:0001836: release of cytochrome c from mitochondria (biological_process); GO:0005741: mitochondrial outer membrane (cellular_component); GO:0008053: mitochondrial fusion (biological_process); GO:0008630: intrinsic apoptotic signaling pathway in response to DNA damage (biological_process); GO:0015267: channel activity (molecular_function); GO:0042803: protein homodimerization activity (molecular…	K02159|BAX	http://www.genome.jp/dbget-bin/www_bget?ko:K02159	--	--	gi|1025052911|ref|XP_016330841.1|	1e-44	104/137(75.91)	186	PREDICTED: apoptosis regulator BAX-like [Sinocyclocheilus anshuiensis]	XM_016475355.1	2e-58	109/169(64.50)	199	PREDICTED: Sinocyclocheilus anshuiensis apoptosis regulator BAX-like (LOC107679719), mRNA	--	--	--	--	--
CAFS_CC_T_00091340	--	--	--	--	[L]	Replication, recombination and repair	gi|908465683|ref|XP_013120445.1|	8.5e-173	345/626(55.11)	613	PREDICTED: zinc finger BED domain-containing protein 1-like [Oreochromis niloticus]	LN590686.1	9e-178	287/289(99.31)	566	Cyprinus carpio genome assembly common carp genome, scaffold: LG35, chromosome: 35	sp|P86452|ZBED6_HUMAN	1e-08	60/229(26.20)	63	Zinc finger BED domain-containing protein 6 OS=Homo sapiens GN=ZBED6 PE=3 SV=1
CAFS_CC_T_00092212	2	GO:0016021: integral component of membrane (cellular_component); GO:0016740: transferase activity (molecular_function);	K00799|GST, gst	http://www.genome.jp/dbget-bin/www_bget?ko:K00799	--	--	gi|966643245|gb|KTF78157.1|	3.5e-76	155/155(100.00)	290	hypothetical protein cypCar_00021964 [Cyprinus carpio]	LC071492.1	1e-90	147/155(94.84)	268	Cyprinus carpio mRNA for microsomal glutathione S-transferase 2, complete cds, isolate: MGST1_2	sp|P79382|MGST1_PIG	5.5e-42	90/155(58.06)	171	Microsomal glutathione S-transferase 1 OS=Sus scrofa GN=MGST1 PE=2 SV=3
CAFS_CC_T_00104597	7	GO:0000463: maturation of LSU-rRNA from tricistronic rRNA transcript (SSU-rRNA, 5.8S rRNA, LSU-rRNA) (biological_process); GO:0000466: maturation of 5.8S rRNA from tricistronic rRNA transcript (SSU-rRNA, 5.8S rRNA, LSU-rRNA) (biological_process); GO:0005654: nucleoplasm (cellular_component); GO:0008283: cell proliferation (biological_process); GO:0030687: preribosome, large subunit precursor (cel…	K14863|YTM1, WDR12	http://www.genome.jp/dbget-bin/www_bget?ko:K14863	[Z]	Cytoskeleton	gi|966700928|gb|KTG33169.1|	2.6e-235	421/422(99.76)	820	hypothetical protein cypCar_00021560 [Cyprinus carpio]	XM_016472561.1	0	398/422(94.31)	801	PREDICTED: Sinocyclocheilus anshuiensis ribosome biogenesis protein wdr12 (LOC107677607), mRNA	sp|Q6NX08|WDR12_DANRE	7.1e-225	395/422(93.60)	780	Ribosome biogenesis protein wdr12 OS=Danio rerio GN=wdr12 PE=2 SV=1
CAFS_CC_T_00119506	3	GO:0005215: transporter activity (molecular_function); GO:0016021: integral component of membrane (cellular_component); GO:0055085: transmembrane transport (biological_process);	K14387|SLC5A7, CHT1	http://www.genome.jp/dbget-bin/www_bget?ko:K14387	[I]	Lipid transport and metabolism	gi|966645621|gb|KTF80533.1|	0	588/588(100.00)	1138	hypothetical protein cypCar_00015594 [Cyprinus carpio]	XM_016544545.1	0	568/589(96.43)	1095	PREDICTED: Sinocyclocheilus rhinocerous high affinity choline transporter 1-like (LOC107733037), mRNA	sp|Q9GZV3|SC5A7_HUMAN	1.2e-238	420/585(71.79)	827	High affinity choline transporter 1 OS=Homo sapiens GN=SLC5A7 PE=2 SV=1
CAFS_CC_T_00080299	--	--	K04667|INHB	http://www.genome.jp/dbget-bin/www_bget?ko:K04667	--	--	gi|847168554|ref|XP_012808082.1|	1.4e-157	317/355(89.30)	562	PREDICTED: uncharacterized protein LOC105945201 [Xenopus tropicalis]	XM_012952628.1	0	274/296(92.57)	560	PREDICTED: Xenopus (Silurana) tropicalis uncharacterized LOC105945201 (LOC105945201), mRNA	--	--	--	--	--
CAFS_CC_T_00180514	--	--	--	--	[R]	General function prediction only	gi|966699912|gb|KTG32153.1|	5.6e-105	186/187(99.47)	386	hypothetical protein cypCar_00012845 [Cyprinus carpio]	XM_016514950.1	1e-130	182/187(97.33)	383	PREDICTED: Sinocyclocheilus rhinocerous sterile alpha motif domain-containing protein 5-like (LOC107710209), mRNA	sp|Q5TGI4|SAMD5_HUMAN	3.9e-42	97/169(57.40)	172	Sterile alpha motif domain-containing protein 5 OS=Homo sapiens GN=SAMD5 PE=2 SV=1
CAFS_CC_T_00244486	4	GO:0000977: RNA polymerase II regulatory region sequence-specific DNA binding (molecular_function); GO:0000981: RNA polymerase II transcription factor activity, sequence-specific DNA binding (molecular_function); GO:0005634: nucleus (cellular_component); GO:0046983: protein dimerization activity (molecular_function);	K09075|NHLH, HEN, NSCL	http://www.genome.jp/dbget-bin/www_bget?ko:K09075	[K]	Transcription	gi|966655698|gb|KTF90552.1|	8.3e-57	122/122(100.00)	225	hypothetical protein cypCar_00024091 [Cyprinus carpio]	XM_016527358.1	9e-56	119/122(97.54)	177	PREDICTED: Sinocyclocheilus rhinocerous helix-loop-helix protein 2-like (LOC107719823), mRNA	sp|Q02576|HEN1_MOUSE	2e-26	69/73(94.52)	119	Helix-loop-helix protein 1 OS=Mus musculus GN=Nhlh1 PE=2 SV=1
CAFS_CC_T_00110866	22	GO:0000183: chromatin silencing at rDNA (biological_process); GO:0000784: nuclear chromosome, telomeric region (cellular_component); GO:0000786: nucleosome (cellular_component); GO:0003677: DNA binding (molecular_function); GO:0005654: nucleoplasm (cellular_component); GO:0006303: double-strand break repair via nonhomologous end joining (biological_process); GO:0006335: DNA replication-dependent …	K11254|H4	http://www.genome.jp/dbget-bin/www_bget?ko:K11254	[B]	Chromatin structure and dynamics	gi|119575932|gb|EAW55528.1|	5.4e-49	103/103(100.00)	199	histone 1, H4c [Homo sapiens]	XM_007064034.1	5e-51	82/82(100.00)	164	PREDICTED: Chelonia mydas histone H4-like (LOC102934120), mRNA	sp|P62803|H4_BOVIN	1.6e-50	103/103(100.00)	199	Histone H4 OS=Bos taurus PE=1 SV=2
CAFS_CC_T_00173257	2	GO:0006915: apoptotic process (biological_process); GO:0016021: integral component of membrane (cellular_component);	--	--	[R]	General function prediction only	gi|1025121720|ref|XP_016349931.1|	0	527/545(96.70)	1063	PREDICTED: cleft lip and palate transmembrane protein 1-like protein [Sinocyclocheilus anshuiensis]	XM_016494445.1	0	527/545(96.70)	1011	PREDICTED: Sinocyclocheilus anshuiensis cleft lip and palate transmembrane protein 1-like protein (LOC107694764), mRNA	sp|Q6DHU1|CLP1L_DANRE	2.6e-304	513/545(94.13)	1045	Cleft lip and palate transmembrane protein 1-like protein OS=Danio rerio GN=clptm1l PE=2 SV=1
CAFS_CC_T_00226415	5	GO:0002376: immune system process (biological_process); GO:0004930: G-protein coupled receptor activity (molecular_function); GO:0005887: integral component of plasma membrane (cellular_component); GO:0035025: positive regulation of Rho protein signal transduction (biological_process); GO:0051482: positive regulation of cytosolic calcium ion concentration involved in phospholipase C-activating G-…	K08404|GPR17	http://www.genome.jp/dbget-bin/www_bget?ko:K08404	--	--	gi|966701891|gb|KTG34132.1|	7.1e-180	323/323(100.00)	636	hypothetical protein cypCar_00000773 [Cyprinus carpio]	XM_016568695.1	0	313/323(96.90)	635	PREDICTED: Sinocyclocheilus rhinocerous uracil nucleotide/cysteinyl leukotriene receptor-like (LOC107752663), transcript variant X1, mRNA	sp|Q13304|GPR17_HUMAN	2.7e-99	180/316(56.96)	363	Uracil nucleotide/cysteinyl leukotriene receptor OS=Homo sapiens GN=GPR17 PE=2 SV=2
CAFS_CC_T_00183003	--	--	--	--	[R]	General function prediction only	gi|966699912|gb|KTG32153.1|	5.6e-105	186/187(99.47)	386	hypothetical protein cypCar_00012845 [Cyprinus carpio]	XM_016514950.1	1e-130	182/187(97.33)	383	PREDICTED: Sinocyclocheilus rhinocerous sterile alpha motif domain-containing protein 5-like (LOC107710209), mRNA	sp|Q5TGI4|SAMD5_HUMAN	3.9e-42	97/169(57.40)	172	Sterile alpha motif domain-containing protein 5 OS=Homo sapiens GN=SAMD5 PE=2 SV=1
CAFS_CC_T_00110877	22	GO:0000183: chromatin silencing at rDNA (biological_process); GO:0000784: nuclear chromosome, telomeric region (cellular_component); GO:0000786: nucleosome (cellular_component); GO:0003677: DNA binding (molecular_function); GO:0005654: nucleoplasm (cellular_component); GO:0006303: double-strand break repair via nonhomologous end joining (biological_process); GO:0006335: DNA replication-dependent …	K11254|H4	http://www.genome.jp/dbget-bin/www_bget?ko:K11254	[B]	Chromatin structure and dynamics	gi|119575932|gb|EAW55528.1|	5.4e-49	103/103(100.00)	199	histone 1, H4c [Homo sapiens]	XM_007064034.1	5e-51	82/82(100.00)	164	PREDICTED: Chelonia mydas histone H4-like (LOC102934120), mRNA	sp|P62803|H4_BOVIN	1.6e-50	103/103(100.00)	199	Histone H4 OS=Bos taurus PE=1 SV=2
CAFS_CC_T_00183306	7	GO:0003735: structural constituent of ribosome (molecular_function); GO:0004045: aminoacyl-tRNA hydrolase activity (molecular_function); GO:0006412: translation (biological_process); GO:0006839: mitochondrial transport (biological_process); GO:0016021: integral component of membrane (cellular_component); GO:0031966: mitochondrial membrane (cellular_component); GO:0055085: transmembrane transport …	K15112|SLC25A27, UCP4	http://www.genome.jp/dbget-bin/www_bget?ko:K15112	[C]	Energy production and conversion	gi|41054379|ref|NP_956635.1|	6.4e-76	140/167(83.83)	289	mitochondrial uncoupling protein 4 [Danio rerio]	XM_016469336.1	1e-100	147/167(88.02)	303	PREDICTED: Sinocyclocheilus anshuiensis solute carrier family 25 member 27 (slc25a27), mRNA	sp|O95847|UCP4_HUMAN	6.8e-62	110/167(65.87)	238	Mitochondrial uncoupling protein 4 OS=Homo sapiens GN=SLC25A27 PE=1 SV=1
CAFS_CC_T_00113655	3	GO:0005634: nucleus (cellular_component); GO:0007275: multicellular organism development (biological_process); GO:0009653: anatomical structure morphogenesis (biological_process);	--	--	--	--	gi|1020484291|ref|XP_016147700.1|	0	2597/2830(91.77)	3322	PREDICTED: ankyrin repeat domain-containing protein 11-like isoform X2 [Sinocyclocheilus grahami]	XM_016482591.1	0	2688/2832(94.92)	4131	PREDICTED: Sinocyclocheilus anshuiensis ankyrin repeat domain-containing protein 11-like (LOC107685857), transcript variant X2, mRNA	sp|Q6UB99|ANR11_HUMAN	0	1494/2914(51.27)	1101	Ankyrin repeat domain-containing protein 11 OS=Homo sapiens GN=ANKRD11 PE=1 SV=3
CAFS_CC_T_00114224	22	GO:0000183: chromatin silencing at rDNA (biological_process); GO:0000784: nuclear chromosome, telomeric region (cellular_component); GO:0000786: nucleosome (cellular_component); GO:0003677: DNA binding (molecular_function); GO:0005654: nucleoplasm (cellular_component); GO:0006303: double-strand break repair via nonhomologous end joining (biological_process); GO:0006335: DNA replication-dependent …	K11254|H4	http://www.genome.jp/dbget-bin/www_bget?ko:K11254	[B]	Chromatin structure and dynamics	gi|119575932|gb|EAW55528.1|	5.4e-49	103/103(100.00)	199	histone 1, H4c [Homo sapiens]	XM_007064034.1	5e-51	82/82(100.00)	164	PREDICTED: Chelonia mydas histone H4-like (LOC102934120), mRNA	sp|P62803|H4_BOVIN	1.6e-50	103/103(100.00)	199	Histone H4 OS=Bos taurus PE=1 SV=2
