# Supplementary material for: Bulked Segregant Analysis and Association Analysis Identified the Polymorphisms Related to the Intermuscular Bones in Common Carp (Cyprinus carpio)
Source: Biology (Basel). 2022 Mar 21;11(3):477. doi: 10.3390/biology11030477 (PMC8945855; doi:10.3390/biology11030477)
Supplement: Supplementary file 1 [file biology-11-00477-s001.zip › Supplementary-Table-S7.xlsx]

## Sheet: A1
Position	A1.3023447	A1.3023466	A1.3023490	A1.3023505	A1.3023508	A1.3023523	A1.3023529	A1.3023570	A1.3023571	A1.3023635	A1.3023676	A1.3023685	A1.3023694	A1.3023730	A1.3023745	A1.3023753	A1.3023796	A1.3023814
HB5	AA	GG	CC	CC	CC	CC	TT	AA	CC	CC	GG	CC	AA	GG	AA	TT	GG	AA
HB6	AT	GG	CC	CC	CC	CC	TT	AA	CG	CC	GG	TC	TA	GG	GG	AA	GG	AA
HB7	TT	GA	CC	CC	CC	CC	TT	AA	CG	CC	GG	TC	TA	GG	GG	AA	GG	AA
HB8	AA	GG	CC	CC	CC	CC	TT	AA	CG	CC	GG	TC	TA	GG	GG	TA	GG	AA
HB9	AA	GG	CC	CC	CC	CC	TT	AA	CC	CC	GG	CC	TA	GG	GA	TT	GG	AA
HB10	AA	GG	CC	CC	CC	CC	TT	AA	CC	CC	GG	CC	TT	GG	GG	TA	GG	AA
HB11	AA	GG	CC	CC	CC	CC	TT	GA	CC	CC	GG	CC	TT	GG	GG	AA	GG	GA
HB12	AT	GG	CC	CC	CC	CC	TT	AA	CG	CC	GG	TC	TA	GG	GG	TA	GG	AA
HB13	AA	GG	CC	CC	CC	CC	TT	AA	CC	CC	GG	CC	AA	GG	GA	TT	GG	AA
HB14	AA	GG	CC	CC	CC	CC	TT	GA	CC	CC	GG	CC	TT	GG	GG	AA	GG	AA
HB15	AA	GG	CC	CC	CC	CC	TT	AA	CC	CC	GG	CC	TA	GG	GA	TT	GG	AA
HB16	AA	GG	CC	CC	CC	CC	TT	GA	CC	CC	GG	CC	TT	GG	GG	TA	GG	GA
HB17	AA	GG	CC	CT	CC	CC	TT	AA	CG	CC	GG	TC	TT	GG	GG	AA	GG	AA
HB18	AA	GG	CC	CC	CC	CC	TT	GA	CC	CC	GG	CC	TT	GG	GG	TA	GG	GA
HB19	AA	GG	CC	CC	CC	CC	TT	AA	CC	CC	GG	CC	TT	GG	GG	TT	GG	AA
HB20	AA	GG	CC	CC	CC	CC	TT	AA	CC	CC	GG	CC	TT	GG	GG	TT	GG	AA
HB21	AA	GG	CC	CC	CC	CC	TT	GA	CC	CC	GG	CC	TT	GG	GG	AA	GG	GA
HB22	AA	GG	CC	CC	CC	CC	TT	AA	CC	CC	GG	CC	TA	GG	GA	TT	GG	AA
HB23	AA	GG	CC	CC	CC	CC	TT	AA	CC	CC	GG	CC	TA	GG	GA	TT	GG	AA
HB24	AA	GG	CC	CC	CC	CC	TT	AA	CT	CC	GG	CC	TA	GG	GG	TA	GG	AA
HB25	AA	GG	CC	CC	CC	CC	TT	AA	CC	CC	GG	CC	AA	GG	AA	TT	GG	AA
HB26	AA	GG	CC	CC	CC	CC	TT	AA	CC	CC	GG	CC	TA	GG	GA	TA	GG	AA
HB27	AA	GG	CC	CC	CC	CC	TT	AA	CC	CC	GG	CC	TA	GG	GA	TT	GG	AA
HB28	AA	GG	CC	CC	CC	CC	TT	AA	CC	CC	GG	CC	TA	GG	GA	TT	GG	AA
HB29	AA	GG	CC	CC	CC	CC	TT	GA	CC	CC	GG	CC	TT	GG	GG	TA	GG	GA
HB30	AA	GG	CC	CC	CC	CC	TT	GA	CC	CC	GG	CC	TA	GG	GA	TA	GG	GA
HB31	AA	GG	CC	CC	CC	CC	TT	AA	CC	CC	GG	CC	TT	GG	GG	TA	GG	AA
HB32	AA	GG	CC	CC	CC	CC	TT	GA	CC	CC	GG	CC	TT	GG	GG	AA	GG	GA
HB33	AA	GG	CC	CC	CC	CC	TT	GA	CC	CC	GG	CC	TA	GG	GA	TA	GG	AA
HB34	TT	GG	CC	CC	CC	CC	TT	AA	GG	CC	GG	TT	AA	GG	GG	AA	GG	AA
HB35	AT	GG	CC	CC	CC	CC	TT	AA	CG	CC	GG	TC	TA	GG	GG	TA	GG	AA
HB36	AT	GG	CC	CC	CC	CC	TT	AA	CG	CC	GG	TC	AA	GG	GG	TA	GG	AA
HB37	AA	GG	CC	CT	CC	CC	TT	AA	CC	CC	GG	CC	TT	GG	GG	AA	GG	AA
HB38	AA	GG	CC	CC	CC	CC	TT	AA	CC	CC	GG	CC	TA	GG	GG	TT	GG	AA
HB39	AA	GG	CC	CC	CC	CC	TT	GA	CC	CC	GG	CC	TA	GG	GG	TA	GG	GA
HB40	AA	GG	CC	CC	CC	CC	TT	AA	CC	CC	GG	CC	TT	GG	GG	TT	GG	AA
HB41	AA	GG	CC	CC	CC	CC	TT	AA	CC	CC	GG	CC	TT	GG	GG	TT	GG	AA
HB42	AT	GG	CC	CC	CC	CC	TT	AA	CG	CC	GG	TC	TA	GG	GG	TA	GG	AA
HB43	AA	GG	CC	CC	CC	CC	TT	AA	CC	CC	GG	CC	TA	GG	GA	TT	GG	AA
HB44	AA	GG	CC	CC	CC	CC	TT	AA	CC	CC	GG	CC	TA	GG	GA	TT	GG	AA
HB45	AA	GG	CC	CC	CC	CC	TT	AA	CG	CC	GG	TC	TT	GG	GG	TA	GG	AA
HB46	AA	GG	CC	CC	CC	CC	TT	GA	CC	CC	GG	CC	TT	GG	GG	AA	GG	AA
HB47	AA	GG	CC	CC	CC	CC	TT	AA	CC	CC	GG	CC	TA	GG	GA	TT	GG	AA
HB48	AA	GG	CC	CC	CC	CT	TT	GG	CC	CC	GG	CC	TA	GG	GG	AA	GG	AA
HB49	AT	GG	CC	CC	CC	CC	TT	AA	CG	CC	GG	TC	TA	GG	GG	TA	GG	AA
HB50	AT	GA	CC	CC	CC	CC	TT	AA	CC	CC	GG	CC	TA	GG	GA	TA	GG	AA
HB51	AA	GG	CC	CT	CC	CC	TT	AA	CG	CC	GG	TC	TT	GG	GG	AA	GG	AA
HB52	AA	GG	CC	CC	CC	CC	TT	AA	CC	CC	GG	CC	TA	GG	GA	TT	GG	AA
HB53	AA	GG	CC	CC	CC	CC	TT	AA	CC	CC	GG	CC	TT	GG	GG	TT	GG	AA
HB54	AA	GG	CC	CT	CC	CC	TT	AA	CC	CC	GG	CC	TT	GG	GG	TA	GG	AA
HH6	AA	GG	CT	CC	CC	CC	TT	AA	CG	CT	GG	CC	TA	NA	GG	TA	GG	GA
HH7	AT	GG	CT	CC	CT	CC	TT	AA	CG	TT	GA	CC	TA	GA	GG	AA	GG	AA
HH8	AT	GG	CC	CC	CC	CC	TT	AA	GG	CT	GG	CC	TA	GA	GG	AA	GG	AA
HH9	AA	GG	CC	CC	CC	CC	TT	AA	CC	CC	GG	TC	TT	GG	GG	TA	GT	GA
HH10	AT	GG	CC	CC	CC	TT	TT	GG	CC	CC	GG	CC	AA	GG	GG	AA	GG	AA
HH11	AA	GG	CC	CC	CC	CC	TT	GA	CG	CC	GG	CC	TA	GA	GG	AA	GG	AA
HH12	AA	GG	CC	CC	CC	CC	TT	GA	CG	CC	GG	CC	AA	GA	GG	AA	GG	GA
HH13	AT	GA	CC	CC	CC	CC	TT	AA	CG	CC	GG	CC	TT	GG	GG	AA	GG	AA
HH14	AT	GG	CC	CC	CC	CC	TT	AA	CG	CC	GG	CC	TA	GA	GG	AA	GG	AA
HH15	AA	GG	CC	CC	CC	CC	TT	GA	CC	CC	GG	TT	TT	GG	GG	AA	GG	GA
HH16	AT	GG	CC	CC	CC	CC	TC	AA	CC	CC	GG	CC	TT	GG	GG	TA	GG	GA
HH17	AA	GA	CC	CT	CC	CC	TT	AA	CT	CT	GG	CC	TA	GA	GG	AA	GG	AA
HH18	AA	GG	CC	CC	CC	CT	TT	GA	CG	CT	GG	CC	AA	GA	GG	AA	GG	AA
HH19	AT	GG	CT	CC	CT	CC	TT	AA	CC	CT	GA	CC	TT	GG	GG	TA	GG	AA
HH20	AA	GG	CC	CC	CC	CT	TT	GA	CC	CC	GG	CC	TA	GG	GG	TA	GG	GA
HH21	AT	GG	CT	CC	CC	CC	TT	AA	GG	CT	GA	CC	AA	GA	GG	AA	GG	GA
HH22	AT	GG	CC	CC	CC	CC	TT	GA	CG	CC	GG	CC	TT	GG	GG	AA	GG	GA
HH23	AA	GG	CC	CC	CC	CC	TT	GA	CT	CC	GG	CC	TA	GG	GG	TA	GG	AA
HH24	AA	GG	CC	CC	CT	CC	NA	AA	CG	CC	GG	TC	TT	GG	GG	AA	GG	GG
HH25	AT	GG	CT	CC	CC	CC	TT	GA	CG	CC	GA	CC	TA	GG	GG	AA	GG	GA
HH26	AA	GG	CC	CC	CC	CC	TT	GA	CC	CC	GG	TC	TT	GG	GG	AA	GG	AA
HH27	NA	NA	NA	NA	NA	NA	NA	NA	NA	NA	NA	NA	NA	NA	NA	NA	NA	NA
HH28	AA	GG	CC	CC	CC	CC	TT	AA	CC	CC	GG	CC	TT	GG	GG	TT	GG	AA
HH29	AT	GG	CT	CC	CT	CC	TT	GA	CC	CT	GA	CC	TT	GG	GG	AA	GG	AA
HH30	AT	GG	CC	CC	CT	CC	NA	GA	CG	CT	GA	CC	TT	NA	GG	TA	GG	GA
HH31	AA	GA	CC	CT	CC	CC	TT	AA	CT	CC	GG	TC	TT	GG	GG	TA	GG	GA
HH32	AT	GG	CC	CC	CT	CC	TT	GA	CG	CT	GA	CC	TA	GG	GG	AA	GG	GG
HH33	AT	GG	CT	CC	CC	CC	TT	AA	CG	CC	GA	CC	TA	GG	GG	TA	GG	GG
HH34	AA	GG	CC	CC	CT	CC	TT	AA	CG	CC	GG	TC	TT	GG	GG	AA	GG	GG
HH35	AT	GG	CT	CC	CC	CC	TT	GA	CG	CC	GA	TC	TA	GG	GG	TA	GG	GG
HH36	AT	GG	CC	CC	CC	CC	TT	AA	CG	CC	GG	CC	TT	GA	GG	TA	GG	GA
HH37	AT	GG	CC	CC	CT	CT	TT	GA	CG	CT	GA	CC	TA	GG	GG	AA	GG	GA
HH38	AA	GA	CC	CT	CT	CC	NA	GA	CT	CT	GA	CC	TT	GG	GG	AA	GG	GA
HH39	AA	GG	CC	CC	CC	CT	TT	GG	CC	CC	GG	CC	TA	GG	GG	AA	GG	AA
HH40	AA	GG	CC	CC	CC	CC	TT	AA	CT	CC	GG	CC	TA	GG	GG	AA	GG	GG
HH41	AT	GG	CC	CC	CT	CC	TT	AA	GG	CT	GA	CC	TA	GA	GG	AA	GG	GA
HH42	AA	GA	CC	CT	CC	CC	TT	AA	CT	CC	GG	CC	TA	GG	GG	TA	GG	AA
HH43	AT	GG	CC	CC	CT	CC	TT	GA	CG	CT	GA	TC	TA	GG	GG	AA	GG	GA
WQ4	AA	GA	CC	CC	CC	CC	TT	GA	CC	CC	GG	TC	TA	GG	GG	TA	GG	AA
WQ5	AA	GG	CC	CC	CC	CC	TT	AA	CC	CC	GG	TC	TA	GG	GA	TA	GG	GA
WQ6	AA	GA	CC	CC	CC	CC	TT	AA	CC	CC	GG	TC	TT	GG	GG	TT	GG	AA
WQ7	AA	GG	CC	CT	CC	CC	TT	AA	CC	CC	GG	CC	AA	GG	GA	TA	GG	AA
WQ8	AT	GG	CC	CC	CC	CC	TT	AA	CG	CC	GG	CC	TA	GG	GA	TA	GG	AA
WQ9	AT	GG	CC	CC	CC	CC	TT	AA	CG	CC	GG	TT	TA	GG	GG	AA	GG	GA
WQ10	AT	GA	CC	CC	CC	CC	TT	AA	CC	CC	GG	TC	TA	GG	GA	TA	GT	AA
WQ11	AT	GG	CC	CC	CT	CC	TC	GA	CC	CC	GA	TC	TT	GG	GG	AA	GG	GA
WQ12	AA	GG	CC	CC	CC	CC	TT	AA	CC	CC	GG	TC	TA	GG	GA	TA	GG	GA
WQ13	AA	GG	CC	CT	CC	CC	TT	AA	CC	CC	GG	CC	AA	GG	GA	TA	GG	AA
WQ14	AA	GG	CC	CC	CC	CC	TT	AA	CC	CC	GG	TC	AA	GG	GA	TA	GG	GA
WQ15	AA	GG	CC	CT	CC	CC	TT	AA	CC	CC	GG	CC	AA	GG	GA	TA	GG	AA
WQ16	AT	GG	CC	CC	CC	CC	TT	AA	CC	CC	GG	CC	AA	GG	GA	TA	GG	GA
WQ17	AA	GG	CC	CT	CC	CC	TT	AA	CT	CC	GG	CC	TT	GG	GG	AA	GT	AA
WQ18	AA	GG	CC	CC	CC	CC	TT	AA	CC	CC	GG	TC	AA	GG	GA	TA	GG	GA
WQ19	AA	GG	CC	CC	CC	CC	TT	AA	CC	CC	GG	TC	TA	GG	GA	TA	GG	GA
WQ20	AA	GG	CC	CC	CC	CC	TT	AA	CC	CC	GG	TC	TA	GG	GA	TT	GG	GA
WQ21	AT	GG	CC	CC	CC	CC	TT	AA	CC	CC	GG	CC	AA	GG	GA	TA	GG	GA
WQ22	AA	GG	CC	CC	CC	CC	TT	AA	CC	CT	GG	CC	AA	GA	GA	TA	GG	AA
WQ23	AT	GG	CC	CC	CT	CC	TT	GA	CG	CT	GA	TC	TA	GG	GG	AA	GG	GA
WQ24	AA	GG	CC	CC	CC	CC	TT	AA	CC	CC	GG	TC	TT	GG	GG	TT	GG	GA
WQ25	AA	GG	CC	CC	CC	CC	TT	GA	CC	CC	GG	TC	TT	GG	GG	TA	GG	AA
WQ27	AT	GG	CC	CC	CC	CC	TT	AA	CC	CC	GG	CC	TA	GG	GG	TA	GG	GA
WQ28	AA	GG	CC	CC	CC	CC	TT	AA	CC	CC	GG	TC	TT	GG	GG	TA	GG	GA
WQ29	AA	GG	CC	CC	CT	CC	TT	GA	CC	CT	GA	CC	TA	GG	GA	TA	GG	GA
WQ30	AA	GG	CC	CC	CC	CC	TT	AA	CC	CC	GG	TC	TA	GG	GA	TA	GG	GA
WQ31	AT	GG	CC	CC	CC	CC	TT	GA	CC	CT	GG	CC	TA	GG	GG	AA	GG	GG
WQ32	AT	GA	CC	CC	CC	CC	TT	AA	CC	CC	GG	TC	TA	GG	GA	TA	GT	AA
WQ33	AT	GA	CC	CC	CC	CC	TT	AA	CC	CC	GG	TC	TA	GG	GA	TA	GT	AA
WQ34	AA	GG	CC	CC	CC	CC	TT	AA	CC	CC	GG	CC	TA	GG	GG	TT	GG	AA
WQ35	AT	GG	CC	CC	CC	CC	NA	GA	CG	CC	GG	TT	TA	GG	GG	AA	GG	AA
WQ36	AA	GG	CC	CC	CC	CC	TT	AA	CC	CC	GG	TC	TA	GG	GA	TT	GG	GA
WQ37	AA	GG	CC	CC	CC	CC	TT	AA	CC	CC	GG	TC	AA	GG	GA	TA	GG	GA
WQ38	AT	GG	CT	CC	CT	CC	TT	AA	CC	CT	GA	CC	TA	GG	GG	TA	GG	AA
注：HH27未扩增成功，在关联分析中按照NA计算									注：因有四种基因型，无法使用tassle软件，所以关联分析使用R单独计算

## Sheet: A16
Position	A16.2710488	A16.2710697	A16.2710718	A16.2710728	A16.2710743
HB5	CG	AG	AG	CA	TT
HB6	CG	GG	AA	CC	TT
HB7	GG	GG	AA	CC	TT
HB8	CG	GG	AA	CC	TC
HB9	GG	GG	AA	CC	TT
HB10	CG	GG	AA	CC	TT
HB11	NA	AG	AG	CA	TT
HB12	CG	GG	AA	CC	TT
HB13	GG	GG	NA	CA	TT
HB14	GG	GG	AA	CC	TT
HB15	CG	AG	AG	CA	TT
HB16	NA	NA	AG	NA	TT
HB17	GG	GG	AA	CC	TT
HB18	GG	NA	AA	NA	TT
HB19	CG	GG	NA	CC	TT
HB20	CG	AG	AG	CA	TT
HB21	GG	GG	AA	CC	TT
HB22	CG	AG	AG	CA	TC
HB23	CG	GG	NA	CA	TT
HB24	GG	NA	NA	NA	TT
HB25	NA	NA	NA	NA	NA
HB26	CG	AG	AG	CA	TC
HB27	CG	NA	AG	CA	TT
HB28	CG	GG	AA	CC	TT
HB29	CG	NA	AG	CA	TT
HB30	CG	GG	AA	CA	TT
HB31	CG	AG	AG	CA	TT
HB32	CG	AG	AG	CA	TT
HB33	CG	AG	AA	CA	TT
HB34	GG	GG	AA	CC	TT
HB35	CG	AA	GG	AA	TT
HB36	GG	GG	AA	CA	TT
HB37	CG	AG	AG	CA	TT
HB38	CG	GG	AA	CC	TT
HB39	CG	GG	AA	CC	TT
HB40	CG	AG	AA	CA	TT
HB41	GG	NA	NA	CA	TT
HB42	CG	AG	AG	CA	TT
HB43	NA	NA	NA	NA	TT
HB44	GG	NA	NA	NA	NA
HB45	GG	GG	AA	CC	TT
HB46	CG	GG	AA	CA	TT
HB47	GG	GG	AA	CC	TT
HB48	GG	NA	NA	NA	TT
HB49	GG	GG	AA	CC	TT
HB50	CG	GG	AG	CA	TT
HB51	GG	GG	AA	CC	TT
HB52	CG	GG	AA	CA	TT
HB53	NA	NA	NA	NA	TT
HB54	CG	GG	AA	CC	TT
HH6	CG	AG	AG	CA	TT
HH7	CG	GG	AA	CA	TT
HH8	CG	AG	AA	CA	TT
HH9	CG	AG	NA	NA	TT
HH10	CG	NA	AG	CA	TC
HH11	CG	AG	AG	CA	TT
HH12	CG	GG	AA	CA	TC
HH13	GG	GG	AA	CC	TT
HH14	CC	AG	AG	AA	TT
HH15	NA	NA	NA	NA	TT
HH16	CG	GG	AA	CA	TT
HH17	GG	GG	AA	NA	TT
HH18	NA	NA	NA	NA	NA
HH19	CG	AG	AG	CA	TT
HH20	CG	GG	AA	CA	TT
HH21	NA	NA	AA	CC	TT
HH22	CG	GG	AA	CC	TT
HH23	CG	GG	AA	CA	TC
HH24	CG	GG	NA	CA	TT
HH25	GG	GG	AA	CC	TT
HH26	CG	AG	AG	NA	TC
HH27	GG	GG	AA	CC	TT
HH28	NA	GG	AA	CA	TT
HH29	GG	GG	AA	CC	TT
HH30	CC	AG	AA	AA	TT
HH31	CG	GG	AA	CA	TT
HH32	CG	GG	AA	CA	TT
HH33	NA	NA	NA	NA	TT
HH34	CG	GG	AG	CA	TT
HH35	NA	NA	NA	NA	TT
HH36	NA	NA	NA	NA	TT
HH37	CG	AG	AG	CA	TT
HH38	GG	GG	AA	CC	TT
HH39	NA	GG	AA	CA	TT
HH40	CG	GG	NA	CC	TT
HH41	CG	AG	AG	AA	TT
HH42	NA	NA	NA	NA	TT
HH43	CG	AG	AG	CA	TT
WQ4	CC	AG	GG	CA	TT
WQ5	NA	NA	NA	NA	TT
WQ6	CG	GG	AA	CA	TT
WQ7	GG	GG	AA	CC	TC
WQ8	GG	GG	AA	CC	TT
WQ9	CG	AG	AA	CA	TC
WQ10	GG	GG	AA	CC	TT
WQ11	CG	GG	NA	CA	TT
WQ12	CG	GG	AA	CA	TT
WQ13	CG	AG	AG	CA	TC
WQ14	NA	GG	AA	CA	NA
WQ15	CG	AG	AG	CA	TC
WQ16	GG	GG	AA	CC	TT
WQ17	CG	GG	AG	CC	TC
WQ18	CG	GG	AA	CA	TT
WQ19	CG	GG	AA	CA	TT
WQ20	CG	GG	AA	CA	TT
WQ21	GG	GG	AA	CA	TT
WQ22	NA	AG	AA	CC	TT
WQ23	CG	AG	AG	CA	TT
WQ24	CG	GG	AA	CC	TT
WQ25	NA	NA	NA	NA	NA
WQ27	CG	GG	AA	CA	TC
WQ28	CG	GG	AA	CA	TT
WQ29	CG	AG	AA	CA	TT
WQ30	CG	GG	AA	CA	TT
WQ31	CG	GG	AG	CA	TT
WQ32	CG	GG	AA	CA	TT
WQ33	CG	GG	AG	CA	TT
WQ34	GG	GG	AA	CC	TT
WQ35	CG	GG	AG	CA	TT
WQ36	CG	GG	AA	CA	TT
WQ37	CG	AG	AA	CA	TT
WQ38	CG	GG	AA	CC	TT
注：HH18、WQ25未扩增成功，在关联分析中按照NA计算

## Sheet: B25
Position	B25.3800526	B25.3800532	B25.3800560	B25.3800622	B25.3800634	B25.3800655	B25.3800664	B25.3800673	B25.3800685	B25.3800709	B25.3800710	B25.3800766	B25.3800808	B25.3800828	B25.3800847	B25.3800867	B25.3800875	B25.3800879	B25.3800895	B25.3800904	B25.3800911	B25.3800929	B25.3800999	B25.3801007	B25.3801016	B25.3801025	B25.3801028	B25.3801033	B25.3801054	B25.3801056	B25.3801083
HB5	AA	TT	GG	GG	CC	TT	CC	CC	CC	TT	GG	CC	CC	GG	CC	AA	AA	CC	AA	CC	AA	AA	CC	TT	TT	TT	AA	AA	TT	GG	GG
HB6	AT	TT	GG	GG	CC	CT	CC	CC	CC	CT	GG	CC	CC	GG	AC	AA	AA	CC	AG	CA	AA	AA	CA	GT	TT	TT	AA	AA	TT	GG	TG
HB7	AA	TT	GG	GC	CC	CT	CC	CC	CC	CT	GG	CC	CT	GG	AC	AA	AA	CC	AG	CC	NA	AA	CC	GT	TT	TT	AA	AT	TT	GG	TG
HB8	NA	TT	GG	GC	CC	CT	CC	CC	CC	CT	GG	CC	CT	GG	AC	AA	AA	CC	AG	CC	AT	AA	CC	GT	TT	TT	AA	AT	TT	GG	TG
HB9	AA	TT	GG	GC	CC	CC	CC	CC	CC	CC	GG	CC	CT	CG	AA	AA	AG	CT	AG	CC	AT	AA	NA	NA	TT	TT	AA	AT	TT	GG	TG
HB10	AT	TT	GG	GC	CC	CC	CC	CC	CC	CC	GG	CC	CT	GG	AA	AA	AA	CC	GG	CA	NA	AA	CA	GG	TT	TT	AA	AT	TT	GG	TT
HB11	AA	TT	GG	GG	CC	TT	CC	CC	CC	TT	GG	CC	CC	GG	CC	AA	AA	CC	AA	CC	AA	AA	CC	TT	TT	TT	AA	AA	TT	GG	GG
HB12	TT	TT	GG	GG	CC	CC	CC	CC	CC	CC	GG	CC	CC	GG	AA	AA	AA	CC	GG	AA	AA	AA	AA	GG	TT	TT	AA	AA	TT	GG	TT
HB13	AA	TT	GG	GG	CC	CT	CC	CC	CC	CT	GG	CC	CC	CG	AC	AA	AG	CT	AA	CC	AA	NA	NA	NA	TT	TT	AA	AA	TT	GG	GG
HB14	AA	TT	GG	GC	CC	CT	CC	CC	CC	CT	GG	CC	CT	GG	AC	AA	AA	CC	AG	CC	NA	AA	CC	GT	TT	TT	AA	AT	TT	GG	TG
HB15	AA	TT	GG	GC	CC	CT	CC	CC	CC	CT	GG	CC	CT	GG	AC	AA	AA	CC	AG	CC	NA	AA	CC	GT	TT	TT	AA	AT	TT	GG	TG
HB16	AA	TT	GG	GC	CC	CT	CC	CC	CC	CT	GG	CC	CT	GG	AC	AA	AA	CC	AG	CC	AT	AA	CC	GT	TT	TT	AA	AT	TT	GG	TG
HB17	AA	TT	GG	GC	CC	CC	CC	CC	CC	CC	GG	CC	CT	CG	AA	AA	AG	CT	AG	CC	AT	AA	NA	NA	NA	NA	NA	NA	NA	NA	NA
HB18	AA	TT	GG	CC	CC	CC	CC	CC	CC	CC	GG	CC	TT	GG	AA	AA	AA	CC	GG	CC	AA	AA	CC	GG	TT	TT	AA	TT	TT	GG	TT
HB19	NA	TT	GG	GC	CC	CC	CC	CC	CC	CC	GG	CC	CT	CG	AA	AA	AG	CT	AG	CC	NA	NA	NA	NA	TT	TT	AA	AT	TT	GG	TG
HB20	AT	TT	GG	GG	CC	CC	CG	CC	CC	CC	GG	CT	CT	GG	AA	AA	AG	CT	GG	CA	NA	NA	CA	GG	TT	TT	AA	AA	AT	GG	TT
HB21	AA	TT	GG	GG	CC	CT	CC	CC	CC	CT	GG	CC	CC	CG	AC	AA	AG	CT	AA	CC	AA	AA	NA	NA	NA	TT	AA	AA	TT	GG	GG
HB22	AA	TT	GG	CC	CC	CC	CC	CC	CC	CC	GG	CC	TT	GG	AA	AA	AA	CC	GG	CC	AA	AA	CC	GG	TT	TT	AA	TT	TT	GG	TT
HB23	AA	TT	GG	GC	CC	CC	CC	CC	CC	CC	GG	CC	CT	CG	AA	AA	AG	CT	AG	CC	NA	NA	NA	NA	TT	TT	AA	AT	TT	GG	TG
HB24	AA	TT	GG	GG	CC	CT	CG	CC	CC	CT	GG	CC	CC	GG	AC	AA	AG	CT	AG	CC	AT	AA	CC	TT	TT	TT	AA	AA	AT	GG	TG
HB25	AA	TT	GG	GG	CC	CT	CC	CC	CC	CT	GG	CC	CC	CG	AC	AA	AG	CT	AA	CC	AA	NA	NA	NA	TT	TT	AA	AA	TT	GG	GG
HB26	AT	TT	GG	GG	CC	TT	CG	CC	CC	CT	GG	CC	CC	GG	AC	AG	AA	CC	AA	CC	AA	NA	CA	GT	TT	TT	AA	AA	AT	GG	NA
HB27	AT	TT	GG	GG	CC	TT	CG	CC	CC	CT	GG	CC	CC	GG	AC	AG	AA	CC	AA	CC	AA	AT	CA	GT	TT	TT	AA	AA	AT	GG	GG
HB28	NA	TT	GG	GG	CC	TT	CG	CC	CC	CT	GG	CC	CC	GG	AC	AG	AA	CC	AA	CC	AA	NA	CA	GT	TT	TT	AA	AA	AT	GG	GG
HB29	AA	TT	GG	GG	CC	TT	CC	CC	CC	TT	GG	CC	CC	GG	CC	AA	AA	CC	AA	CC	AA	AA	CC	TT	TT	TT	AA	AA	TT	GG	GG
HB30	AA	TT	GG	GG	CC	TT	CC	CC	CC	TT	GG	CC	CC	GG	CC	AA	AA	CC	AA	CC	AA	AA	CC	TT	TT	TT	AA	AA	TT	GG	GG
HB31	AA	TT	GG	GC	CC	CT	CC	CC	CC	CT	GG	CC	CT	GG	AC	AA	AA	CC	AG	CC	NA	AA	CC	GT	TT	TT	AA	AT	TT	GG	TG
HB32	AA	TT	GG	GG	CC	TT	CC	CC	CC	TT	GG	CC	CC	GG	CC	AA	AA	CC	AA	CC	AA	AA	CC	TT	TT	TT	AA	AA	TT	GG	GG
HB33	AA	TT	GG	GC	CC	CC	CC	CC	CC	CC	GG	CC	CT	CG	AA	AA	AG	CT	AG	CC	NA	NA	NA	NA	TT	TT	AA	AT	TT	GG	TG
HB34	AA	TT	GG	GC	CC	CT	CC	CC	CC	CT	GG	CC	CT	GG	AC	AA	AA	CC	AG	CC	AT	AA	CC	GT	TT	TT	AA	AT	TT	GG	TG
HB35	AA	TT	GG	GG	CC	TT	CC	CC	CC	TT	GG	CC	CC	GG	CC	AA	AA	CC	AA	CC	AA	AA	CC	TT	TT	TT	AA	AA	TT	GG	GG
HB36	AA	TT	GG	GC	CC	CT	CC	CC	CC	CT	GG	CC	CT	GG	AC	AA	AA	CC	AG	CC	AT	NA	CC	GT	TT	TT	AA	AT	TT	GG	TG
HB37	AA	TT	GG	GG	CC	CC	CC	CC	CC	CC	GG	CC	CC	CC	AA	AA	GG	TT	AA	CC	AA	AA	AA	GG	NA	TT	AA	AA	TT	GG	GG
HB38	AA	TT	GG	GG	CC	TT	CC	CC	CC	TT	GG	CC	CC	GG	CC	AA	AA	CC	AA	CC	AA	AA	CC	TT	TT	TT	AA	AA	TT	GG	GG
HB39	NA	NA	GG	GC	CC	CT	CC	CC	CC	CT	GG	CC	CT	GG	AC	AA	AA	CC	AG	CC	NA	AA	CC	GT	TT	TT	AA	AT	TT	GG	TG
HB40	AA	TT	GG	CC	CC	CC	CC	CC	CC	CC	GG	CC	TT	GG	AA	AA	AA	CC	GG	CC	AA	AA	CC	GG	TT	TT	AA	TT	TT	GG	TT
HB41	AA	TT	GG	GC	CC	CC	CG	CC	CC	CC	GG	CT	TT	GG	AA	AA	AG	CT	GG	CC	AA	NA	CC	GG	TT	TT	AA	AT	AT	GG	TT
HB42	TT	TT	GG	GG	CC	CT	CG	CC	CC	CC	GG	CC	CC	GG	AA	AG	AA	CC	AG	CA	AA	AT	AA	GG	TT	TT	AA	AA	AT	GG	TG
HB43	AA	TT	GG	GG	CC	CT	CC	CC	CC	CT	GG	CC	CC	CG	AC	AA	AG	CT	AA	CC	AA	NA	NA	NA	NA	TT	AA	AA	TT	GG	GG
HB44	AA	TT	GG	GG	CC	CT	CC	CC	CC	CT	GG	CC	CC	CG	AC	AA	AG	CT	AA	CC	AA	NA	NA	NA	TT	TT	AA	AA	TT	GG	GG
HB45	AA	TT	GG	GG	CC	CC	CC	CC	CC	CC	GG	CC	CC	CC	AA	AA	GG	TT	AA	CC	AA	AA	AA	GG	NA	TT	AA	AA	TT	GG	GG
HB46	AA	TT	GG	GC	CC	CC	CG	CC	CC	CC	GG	CT	TT	GG	AA	AA	AG	CT	GG	CC	AA	NA	CC	GG	TT	TT	AA	AT	AT	GG	TT
HB47	NA	TT	GG	GC	CC	CT	CC	CC	CC	CT	GG	CC	CT	GG	AC	AA	AA	CC	AG	CC	AT	AA	CC	GT	TT	TT	AA	AT	TT	GG	TG
HB48	NA	NA	GG	GG	CC	CT	CG	CC	CC	CT	GG	CC	CC	GG	AC	AG	AA	CC	AA	CC	AA	AT	CA	GT	TT	TT	AA	AA	AT	GG	GG
HB49	AA	TT	GG	GC	CC	CT	CC	CC	CC	CT	GG	CC	CT	GG	AC	AA	AA	CC	AG	CC	AT	AA	CC	GT	TT	TT	AA	AT	TT	GG	TG
HB50	AA	TT	GG	GG	CC	TT	CC	CC	CC	TT	GG	CC	CC	GG	CC	AA	AA	CC	AA	CC	AA	AA	CC	TT	TT	TT	AA	AA	TT	GG	GG
HB51	TT	TT	GG	GG	CC	TT	GG	CC	CC	CC	GG	CC	CC	GG	AA	GG	AA	CC	AA	CC	AA	TT	AA	GG	TT	TT	AA	AA	AA	GG	GG
HB52	AA	TT	GG	CC	CC	CC	CC	CC	CC	CC	GG	CC	TT	GG	AA	AA	AA	CC	GG	CC	AA	AA	CC	GG	TT	TT	AA	TT	TT	GG	TT
HB53	AA	TT	GG	GG	CC	CC	CC	CC	CC	CC	GG	CC	CC	CC	AA	AA	GG	TT	AA	CC	AA	AA	AA	GG	NA	TT	AA	AA	TT	GG	GG
HB54	AT	TT	GG	GC	CC	CC	CC	CC	CC	CC	GG	CC	CT	GG	AA	AA	AA	CC	GG	CA	NA	AA	CA	GG	TT	TT	AA	AT	TT	GG	TT
HH6	AA	TT	GG	GG	CC	CC	CG	CC	CC	CC	GA	CT	CT	GG	AA	AA	AG	CT	AG	CC	AT	AA	NA	NA	NA	NA	NA	NA	NA	NA	NA
HH7	AA	TG	GG	GG	CC	CC	GG	CC	CC	CC	GG	CC	CC	GG	AA	AA	AG	CT	GG	CC	AA	AA	CA	TT	TG	TT	AA	AA	NA	NA	NA
HH8	AA	TT	GG	GG	CC	CC	CC	CC	CC	CC	GG	CC	CT	CG	AA	AA	GG	TT	AG	CC	AT	AA	CC	GT	TG	TT	AA	AT	AT	GG	TG
HH9	NA	NA	GG	GG	CC	CC	CC	CC	CC	CC	GA	TT	TT	GG	AA	AA	AA	CC	AA	CC	TT	AA	CC	GG	TT	TT	GA	AA	AA	GG	TT
HH10	AA	TT	GG	GG	CC	TT	CG	CC	AC	CC	GA	CC	CC	GG	AA	AA	AG	CT	AA	CC	NA	AA	NA	TT	GG	NA	NA	NA	NA	NA	NA
HH11	NA	NA	NA	NA	NA	NA	NA	NA	NA	NA	NA	NA	TT	CG	AA	AA	AA	NA	AA	CC	AA	AA	CC	GG	TT	TT	NA	AA	NA	NA	NA
HH12	AA	TT	GG	GG	CC	CC	CC	CC	CC	CT	GG	CC	CC	CG	AA	AA	AG	CT	AG	CA	AA	AA	CA	GT	TT	TT	AA	AA	TT	GA	GG
HH13	AT	TT	GG	GG	CC	CC	CC	CC	AC	CC	GG	CC	CC	CC	AA	AA	AG	CT	AA	CC	AA	AA	CA	TT	GG	TG	AA	AA	AT	GG	TG
HH14	AA	TT	GG	GG	CC	CC	CG	CC	CC	CC	GG	TT	CT	CC	AA	AA	GG	CT	AG	CC	AT	NA	NA	NA	NA	NA	NA	NA	NA	NA	NA
HH15	AA	TG	GG	GG	CC	CC	CG	CC	CC	CC	GG	CC	CT	GG	AA	AA	AG	CT	AG	CC	NA	NA	NA	NA	NA	NA	NA	NA	NA	NA	NA
HH16	AT	TT	GG	GG	CC	CC	CG	CC	CC	CC	GG	CT	TT	CG	AA	AA	AA	CC	AG	CC	AT	AA	CA	GT	TG	TG	AG	AA	AT	GG	TG
HH17	AA	TT	GG	GG	CC	CT	CG	CC	AC	CC	GG	CC	CT	CG	AA	AA	AG	CT	AG	CC	AA	AA	CC	GT	TT	TT	AG	AA	AT	GA	GG
HH18	AA	TT	GG	GG	CC	CC	CG	CC	CC	CC	GG	CT	CT	GG	AA	AA	AG	CT	AG	CC	NA	NA	NA	NA	NA	NA	NA	NA	NA	NA	NA
HH19	AT	TT	GG	GG	CC	TT	CG	CC	AC	CC	GG	CC	CT	GG	AA	AG	AG	CT	AG	CC	AT	AT	AA	GT	TT	TT	AA	AT	AT	GG	TG
HH20	AA	TT	GG	GG	CC	CT	CG	CC	CC	CT	GG	CC	CT	GG	AA	AA	AA	CC	AG	CA	AA	AA	NA	NA	NA	NA	NA	NA	NA	NA	NA
HH21	AA	TT	GG	GG	CC	CC	CC	CC	CC	CC	GG	CT	CT	CG	AA	AA	AG	CT	AA	CC	AA	NA	NA	NA	NA	NA	NA	NA	NA	NA	GG
HH22	AA	TT	GG	GG	CC	CC	CC	CC	CC	CC	GG	CT	CT	GG	AA	AA	AG	CT	AA	CC	AA	NA	NA	NA	NA	NA	NA	NA	NA	NA	NA
HH23	AA	TG	GG	GG	CC	CT	CC	CC	AC	CC	GA	CC	CC	CG	AA	AA	AA	CC	AA	CC	AA	AT	CA	GG	TT	TT	AA	AT	AT	GG	GG
HH24	AA	TT	GG	GG	CC	CT	GG	CC	CC	CC	GG	CT	CT	GG	AA	AA	AG	CT	AA	CC	NA	NA	NA	NA	NA	NA	NA	NA	NA	NA	NA
HH25	AA	TT	GG	GG	CC	CC	GG	CC	CC	CC	GG	CC	CC	GG	AA	AA	GG	TT	GG	CC	AA	AA	CC	TT	NA	TT	AA	AA	AA	GG	TT
HH26	AA	TG	GG	GG	CC	TT	CG	CC	AC	CC	GA	CC	CC	CG	AA	AA	AG	CT	AG	CC	NA	NA	CA	GG	TT	TT	AA	AT	TT	GG	GG
HH27	AA	TT	GG	GG	CC	CT	CG	CC	CC	CC	GG	TT	TT	GG	AA	AA	AA	CC	AA	CC	AA	AA	CC	GG	TT	TT	GA	AA	AA	GG	TT
HH28	AA	TT	GG	GG	CC	CC	CG	CC	AC	CC	GG	CT	CT	CG	AA	AA	AG	CT	AG	CC	AA	NA	CC	GT	TT	TT	AG	AA	AT	GG	NA
HH29	AA	TT	GG	GG	CC	CC	CC	NA	CC	CC	GG	TT	CC	CC	AA	AA	AA	CC	AA	CC	AA	AA	CC	GG	TT	TT	GA	AA	TT	GG	GG
HH30	NA	NA	GC	GG	CC	CC	CC	CC	CC	CC	GG	CT	CT	CG	AA	AA	AA	CC	AG	CC	AT	AA	CA	GT	TG	TG	AG	AA	AT	GG	NA
HH31	NA	NA	GC	GG	CC	CT	CG	CC	AA	CC	GG	CC	CT	GG	AA	AA	AA	CC	AA	CC	AA	NA	CC	GG	TT	TT	AG	AT	AT	GG	GG
HH32	AA	TT	GG	GG	CC	CC	CC	CC	CC	CC	GG	CC	CC	CC	AA	AA	GG	TT	AA	CC	AA	AA	CC	TT	TT	TT	AA	AA	TT	AA	GG
HH33	AA	TT	NA	GG	CC	CC	CC	CC	CC	CC	GG	CT	CT	CG	AA	AA	AG	CT	AA	CC	AA	AA	NA	NA	NA	NA	NA	NA	NA	NA	NA
HH34	AA	TT	GG	GG	CC	CT	GG	CC	CC	CC	GG	CT	CT	GG	AA	AA	AG	CT	AA	CC	NA	NA	NA	NA	NA	NA	NA	NA	NA	NA	NA
HH35	AA	TT	GG	GG	CC	CC	CC	CC	CC	CC	GG	CT	CT	GG	AA	AA	AG	CT	AA	CC	AA	NA	NA	NA	NA	NA	NA	NA	AA	GG	GG
HH36	AA	TT	GG	GG	CC	CC	CG	CC	CC	CC	GG	CT	CT	GG	AA	AA	AG	CT	AG	CC	NA	NA	NA	NA	NA	NA	NA	NA	NA	NA	NA
HH37	AA	TT	GG	GG	CT	CT	GG	CC	CC	CC	GG	CC	CC	GG	AA	AA	GG	TT	AG	CC	AA	AA	AA	TT	GG	TT	AA	AA	NA	NA	GG
HH38	AA	TT	GG	GG	CC	TT	CC	CC	AA	CC	AA	CC	CC	GG	AA	AA	AA	CC	AA	CC	AA	AA	CC	GG	TT	TT	AA	TT	TT	GG	GG
HH39	NA	NA	NA	GG	CC	CT	CC	CC	AC	NA	NA	CC	CT	GG	AA	AA	AA	CC	GG	AA	AA	AA	NA	GG	TT	TT	AG	AA	NA	NA	NA
HH40	AA	TT	GG	GG	CC	CC	CC	CC	CC	CC	GG	CC	CC	CG	AA	AA	GG	TT	AA	CC	AA	AA	CC	TT	TG	TG	AA	AA	AT	GA	TG
HH41	AA	TT	GG	GG	CC	CC	CG	CC	CC	CC	GG	CT	CT	GG	AA	AA	AG	CT	AG	CC	NA	NA	NA	NA	NA	NA	NA	NA	NA	NA	NA
HH42	NA	NA	GG	GG	CC	CT	CC	CC	AC	CC	GA	CC	CC	CG	AA	AA	AG	CT	AA	CC	AA	AA	CA	GT	TG	TT	AA	AT	TT	GG	TG
HH43	TT	TT	AA	GG	CC	CC	CC	CC	CC	CC	GA	CC	CC	GG	AA	AA	GG	TT	AA	CC	AA	AA	CC	TT	TT	GG	AA	AA	AA	GG	GG
WQ4	TT	TT	AA	GG	CC	CC	GG	CC	CC	CC	GG	CC	CC	GG	AA	AA	GG	TT	AA	CC	AA	AA	CC	TT	TT	TT	AA	AA	AA	GG	GG
WQ5	TT	TT	GG	GG	CC	CC	CC	CC	CC	CC	GG	CC	CC	GG	AA	AA	AA	CC	GG	AA	AA	AA	AA	GG	TT	TT	AA	AA	TT	GG	TT
WQ6	NA	NA	NA	NA	NA	NA	NA	NA	NA	NA	NA	NA	NA	NA	NA	NA	NA	NA	NA	NA	NA	NA	NA	NA	NA	NA	NA	NA	NA	NA	NA
WQ7	AA	TT	GG	CC	CC	CC	CC	CC	CC	CC	GG	CC	TT	GG	AA	AA	AA	CC	GG	CC	AA	AA	CC	GG	TT	TT	AA	TT	TT	GG	TT
WQ8	AA	TT	GG	GG	CC	CT	CC	CC	CC	CT	GG	CC	CT	CG	AC	AA	AG	CT	AG	CC	AT	AA	CC	GT	TT	TT	AA	AT	TT	GG	TG
WQ9	AT	TT	GG	GG	CC	CT	CG	CC	CC	CC	GG	CC	CC	CG	AA	AA	AG	CT	AG	CC	AT	NA	NA	NA	NA	NA	NA	NA	NA	NA	NA
WQ10	AA	TT	GG	GG	CC	CT	CC	CC	CC	CT	GG	CC	CC	GG	AC	AA	AA	CC	AA	CC	AA	NA	CC	GT	TT	TT	AG	AA	AT	GG	TT
WQ11	AT	TT	GG	GG	CC	CC	GG	CC	CC	CC	GG	CC	CC	GG	AA	AA	GG	TT	AG	CC	AT	NA	NA	NA	NA	NA	NA	NA	NA	NA	NA
WQ12	AT	TT	GG	GG	CC	TT	CG	CC	CC	CT	GG	CC	CC	GG	AC	AA	AA	CC	AG	CC	AT	NA	NA	NA	NA	NA	NA	NA	NA	NA	NA
WQ13	AA	TT	GG	GC	CC	CC	CC	CC	CC	CC	GG	CT	CT	CG	AA	AA	AA	CC	AG	CC	NA	NA	NA	NA	NA	NA	NA	NA	NA	NA	TG
WQ14	AA	TT	GG	GC	CT	CT	CG	CC	CC	CC	GG	CC	CT	GG	AA	AA	AG	CT	AG	CC	AA	AA	CA	GT	TG	TT	NA	NA	NA	NA	TG
WQ15	AA	TT	GG	GG	CC	TT	CC	CC	CC	TT	GG	CC	CC	GG	CC	AA	AA	CC	AA	CC	AA	AA	CC	TT	TT	TT	AA	AA	TT	GG	GG
WQ16	AA	TT	GG	GG	CC	CT	CC	CC	CC	CT	GG	CC	CC	GG	AC	AA	AG	CT	AA	CC	AT	NA	NA	NA	NA	NA	NA	NA	NA	NA	NA
WQ17	AA	TT	GG	GG	CC	CC	CC	CC	CC	CC	GG	CT	CC	CC	AA	AA	AG	CT	AA	CC	AA	NA	NA	NA	NA	NA	NA	NA	NA	NA	NA
WQ18	AA	TG	GG	GG	CC	CT	CC	CC	AC	CT	GG	CC	CC	GG	AC	AA	AG	CT	AA	CC	AA	AA	CA	TT	TG	TT	AA	AA	TT	GG	GG
WQ19	AA	TT	GG	GG	CC	CT	CC	CC	AC	CT	GG	CC	CT	GG	AC	AA	AA	CC	AG	CC	NA	AA	CC	GT	TT	TT	AA	AA	AT	GG	GG
WQ20	AA	TT	GG	GC	CC	CC	CC	CC	AC	CC	GG	CC	TT	GG	AA	AA	AA	CC	GG	CC	AA	AA	CC	GG	TT	TT	AA	AT	AT	GG	TG
WQ21	AA	TT	GG	GG	CC	CT	CC	CC	CC	CT	GG	CC	CC	GG	AC	AA	AG	CT	AA	CC	AT	NA	NA	NA	NA	NA	NA	NA	NA	NA	NA
WQ22	AA	TG	GG	GC	CC	CC	CC	CC	AC	CC	GG	CT	TT	GG	AA	AA	AA	CC	GG	CC	AA	AA	CC	GG	TT	TT	AA	AT	AT	GG	TG
WQ23	AA	TT	GG	GG	CC	CC	CG	CT	AC	CC	GG	CC	CC	CC	AA	AA	AG	CT	AA	CC	AA	NA	NA	NA	TT	TT	AA	AA	TT	GG	GG
WQ24	AA	TT	GG	GC	CC	CC	CC	CC	AC	CC	GG	CC	TT	GG	AA	AA	AA	CC	GG	CC	AA	AA	CC	GG	TT	TT	AA	AT	AT	GG	TG
WQ25	AA	TT	GG	GC	CC	CT	CC	CC	CC	CC	GG	CC	CT	GG	AA	AA	AA	CC	AG	CC	AT	AA	CC	GG	TT	TT	AG	AT	TT	GG	TT
WQ27	AA	TT	GG	GG	CC	CC	CC	CC	CC	CC	GG	CC	CC	CG	AA	AA	GG	TT	AA	CC	AT	NA	NA	NA	NA	NA	NA	NA	NA	NA	NA
WQ28	AA	TT	GG	GG	CC	CC	CC	CC	CC	CC	GG	CC	CC	GG	AA	AA	AA	CC	AA	CC	AA	AA	CC	GG	TT	TT	AG	AA	AA	GG	TT
WQ29	AA	TT	GG	GC	CC	CC	CG	CT	AC	CC	GG	CC	CT	CG	AA	AA	AA	CC	AG	CC	AT	NA	CC	GT	TT	TT	AA	AT	TT	GG	TG
WQ30	AA	TT	GG	GC	CC	CC	CC	CC	AC	CC	GG	CC	TT	GG	AA	AA	AA	CC	GG	CC	AA	AA	CC	GG	TT	TT	AA	AT	AT	GG	TG
WQ31	AA	TT	GG	GG	CC	CC	CC	CC	AC	CC	GG	CC	CT	CG	AA	AA	AG	CT	AG	CC	AT	AA	NA	NA	NA	TT	AA	AA	AT	GG	GG
WQ32	AA	TT	GG	GC	CC	CC	CC	CC	CC	CC	GG	CC	CT	GG	AA	AA	AA	CC	AG	CC	NA	NA	CC	GG	TT	TT	AG	AT	AT	GG	TT
WQ33	AT	TT	GG	GG	CC	TT	CG	CC	CC	CT	GG	CC	CC	GG	AC	AA	AA	CC	AG	CC	AT	NA	NA	NA	NA	NA	NA	NA	NA	NA	NA
WQ34	AA	TT	GG	GG	CC	TT	CC	CC	CC	TT	GG	CC	CC	GG	CC	AA	AA	CC	AA	CC	AA	AA	CC	TT	TT	TT	AA	AA	TT	GG	GG
WQ35	AA	TG	GG	GC	CC	CC	CC	CC	AC	CC	GG	CC	CT	GG	AA	AA	AG	CT	AG	CC	NA	AA	CA	GT	TG	TT	AA	AT	TT	GG	TG
WQ36	AA	TT	GG	GC	CC	CC	CC	CC	AC	CC	GG	CC	TT	GG	AA	AA	AA	CC	GG	CC	AA	AA	CC	GG	TT	TT	AA	AT	AT	GG	TG
WQ37	AA	TT	GG	GC	CT	CT	CG	CC	CC	CC	GG	CC	CT	GG	AA	AA	AG	CT	AG	CC	AA	AA	CA	GT	TG	TT	NA	NA	NA	NA	NA
WQ38	AA	TT	GG	GG	CC	CC	CC	CC	CC	CC	GG	CC	CC	GG	AA	AA	AA	CC	AA	CC	AA	AA	CC	TT	GG	TT	AA	AA	AA	GG	TT
注：WQ6未扩增成功，在关联分析中按照NA计算
