# Supplementary material for: Bulked Segregant Analysis and Association Analysis Identified the Polymorphisms Related to the Intermuscular Bones in Common Carp (Cyprinus carpio)
Source: Biology (Basel). 2022 Mar 21;11(3):477. doi: 10.3390/biology11030477 (PMC8945855; doi:10.3390/biology11030477)
Supplement: Supplementary file 1 [file biology-11-00477-s001.zip › Supplementary-Table-S10.xlsx]

## Sheet: HB-BMP-deleterious exonic SNPs
Mutation type	#GeneID	GOTerms_num	GO_Anno	KEGG_entry	KEGG_url	KOG_class	KOG_class_annotation	NR_ID	E_value	Identity	Score	Annotation	NT_ID	E_value	Identity	Score	Annotation	Swissprot_ID	E_value	Identity	Score	Annotation
nonsynonymous SNV	CAFS_CC_T_00001537	1	GO:0016020: membrane (cellular_component);	--	--	[T]	Signal transduction mechanisms	gi|966672208|gb|KTG05589.1|	4e-217	372/383(97.13)	760	hypothetical protein cypCar_00026871 [Cyprinus carpio]	XM_016440768.1	0	292/336(86.90)	629	PREDICTED: Sinocyclocheilus anshuiensis bone morphogenetic protein 2-B-like (LOC107653903), mRNA	sp|O46564|BMP2_RABIT	7.8e-40	111/347(31.99)	166	Bone morphogenetic protein 2 OS=Oryctolagus cuniculus GN=BMP2 PE=2 SV=1
nonsynonymous SNV	CAFS_CC_T_00022154	24	GO:0000122: negative regulation of transcription from RNA polymerase II promoter (biological_process); GO:0000981: RNA polymerase II transcription factor activity, sequence-specific DNA binding (molecular_function); GO:0001568: blood vessel development (biological_process); GO:0001706: endoderm formation (biological_process); GO:0001947: heart looping (biological_process); GO:0005634: nucleus (ce…	K09400|FOXH	http://www.genome.jp/dbget-bin/www_bget?ko:K09400	[K]	Transcription	gi|966668802|gb|KTG02183.1|	4.4e-269	472/472(100.00)	932	hypothetical protein cypCar_00025006 [Cyprinus carpio]	XM_016239959.1	0	478/510(93.73)	905	PREDICTED: Sinocyclocheilus grahami forkhead box protein H1-like (LOC107556762), mRNA	sp|Q9I9E1|FOXH1_DANRE	2.6e-245	411/472(87.08)	849	Forkhead box protein H1 OS=Danio rerio GN=foxh1 PE=1 SV=1
nonsynonymous SNV	CAFS_CC_T_00148473	15	GO:0001649: osteoblast differentiation (biological_process); GO:0003007: heart morphogenesis (biological_process); GO:0005634: nucleus (cellular_component); GO:0030326: embryonic limb morphogenesis (biological_process); GO:0030509: BMP signaling pathway (biological_process); GO:0042981: regulation of apoptotic process (biological_process); GO:0043565: sequence-specific DNA binding (molecular_func…	K09341|MSX	http://www.genome.jp/dbget-bin/www_bget?ko:K09341	[R]	General function prediction only	gi|1025405696|ref|XP_016409193.1|	7.2e-119	223/250(89.20)	433	PREDICTED: homeobox protein MSH-A-like [Sinocyclocheilus rhinocerous]	XM_016289684.1	1e-161	231/257(89.88)	456	PREDICTED: Sinocyclocheilus grahami homeobox protein MSH-A-like (LOC107598376), mRNA	sp|Q03357|MSXA_DANRE	3.5e-102	200/247(80.97)	372	Homeobox protein MSH-A OS=Danio rerio GN=msxa PE=2 SV=2
nonsynonymous SNV	CAFS_CC_T_00176310	12	GO:0005125: cytokine activity (molecular_function); GO:0005160: transforming growth factor beta receptor binding (molecular_function); GO:0005615: extracellular space (cellular_component); GO:0008083: growth factor activity (molecular_function); GO:0010862: positive regulation of pathway-restricted SMAD protein phosphorylation (biological_process); GO:0040007: growth (biological_process); GO:0042…	--	--	[T]	Signal transduction mechanisms	gi|966714521|gb|KTG46759.1|	2.5e-72	149/188(79.26)	278	hypothetical protein cypCar_00030983, partial [Cyprinus carpio]	XM_016485416.1	1e-102	150/196(76.53)	289	PREDICTED: Sinocyclocheilus anshuiensis bone morphogenetic protein 2-like (LOC107687929), mRNA	sp|P12644|BMP4_HUMAN	8.1e-07	50/184(27.17)	55	Bone morphogenetic protein 4 OS=Homo sapiens GN=BMP4 PE=1 SV=1
nonsynonymous SNV	CAFS_CC_T_00041831	49	GO:0001666: response to hypoxia (biological_process); GO:0003143: embryonic heart tube morphogenesis (biological_process); GO:0003220: left ventricular cardiac muscle tissue morphogenesis (biological_process); GO:0003300: cardiac muscle hypertrophy (biological_process); GO:0005219: ryanodine-sensitive calcium-release channel activity (molecular_function); GO:0005509: calcium ion binding (molecula…	K04962|RYR2	http://www.genome.jp/dbget-bin/www_bget?ko:K04962	[T]	Signal transduction mechanisms	gi|1020413300|ref|XP_016125404.1|	5.4e-136	285/462(61.69)	490	PREDICTED: LOW QUALITY PROTEIN: ryanodine receptor 2-like [Sinocyclocheilus grahami]	LN590671.1	8e-176	164/165(99.39)	346	Cyprinus carpio genome assembly common carp genome, scaffold: LG49, chromosome: 49	sp|P30957|RYR2_RABIT	4.9e-81	155/212(73.11)	302	Ryanodine receptor 2 OS=Oryctolagus cuniculus GN=RYR2 PE=1 SV=3
nonsynonymous SNV	CAFS_CC_T_00042658	9	GO:0001558: regulation of cell growth (biological_process); GO:0001568: blood vessel development (biological_process); GO:0001756: somitogenesis (biological_process); GO:0004867: serine-type endopeptidase inhibitor activity (molecular_function); GO:0005520: insulin-like growth factor binding (molecular_function); GO:0005576: extracellular region (cellular_component); GO:0010951: negative regulati…	--	--	[WV]	--	gi|1025053128|ref|XP_016330901.1|	0	836/865(96.65)	1602	PREDICTED: cysteine-rich motor neuron 1 protein isoform X1 [Sinocyclocheilus anshuiensis]	BC162591.1	0	825/865(95.38)	1625	Danio rerio cysteine rich transmembrane BMP regulator 1 (chordin like), mRNA (cDNA clone MGC:193853 IMAGE:9038059), complete cds	sp|Q7T3Q2|CRIM1_DANRE	0	814/865(94.10)	1568	Cysteine-rich motor neuron 1 protein OS=Danio rerio GN=crim1 PE=2 SV=1
nonsynonymous SNV	CAFS_CC_T_00056368	12	GO:0005125: cytokine activity (molecular_function); GO:0005160: transforming growth factor beta receptor binding (molecular_function); GO:0005615: extracellular space (cellular_component); GO:0008083: growth factor activity (molecular_function); GO:0010862: positive regulation of pathway-restricted SMAD protein phosphorylation (biological_process); GO:0040007: growth (biological_process); GO:0042…	--	--	[T]	Signal transduction mechanisms	gi|1025084224|ref|XP_016340902.1|	3.9e-209	358/370(96.76)	733	PREDICTED: bone morphogenetic protein 2-like [Sinocyclocheilus anshuiensis]	XM_016485416.1	0	358/370(96.76)	706	PREDICTED: Sinocyclocheilus anshuiensis bone morphogenetic protein 2-like (LOC107687929), mRNA	sp|P12643|BMP2_HUMAN	2.1e-50	129/380(33.95)	201	Bone morphogenetic protein 2 OS=Homo sapiens GN=BMP2 PE=1 SV=1
nonsynonymous SNV	CAFS_CC_T_00092242	6	GO:0000166: nucleotide binding (molecular_function); GO:0005639: integral component of nuclear inner membrane (cellular_component); GO:0006998: nuclear envelope organization (biological_process); GO:0030514: negative regulation of BMP signaling pathway (biological_process); GO:0031490: chromatin DNA binding (molecular_function); GO:0070197: meiotic attachment of telomere to nuclear envelope (biol…	--	--	--	--	gi|1025216448|ref|XP_016430187.1|	0	684/736(92.93)	1208	PREDICTED: inner nuclear membrane protein Man1 [Sinocyclocheilus rhinocerous]	XM_016574701.1	0	682/736(92.66)	1098	PREDICTED: Sinocyclocheilus rhinocerous LEM domain containing 3 (lemd3), mRNA	sp|Q9Y2U8|MAN1_HUMAN	3.2e-127	367/806(45.53)	457	Inner nuclear membrane protein Man1 OS=Homo sapiens GN=LEMD3 PE=1 SV=2
nonsynonymous SNV	CAFS_CC_T_00116897	9	GO:0000209: protein polyubiquitination (biological_process); GO:0005634: nucleus (cellular_component); GO:0005737: cytoplasm (cellular_component); GO:0008045: motor neuron axon guidance (biological_process); GO:0008270: zinc ion binding (molecular_function); GO:0030513: positive regulation of BMP signaling pathway (biological_process); GO:0042787: protein ubiquitination involved in ubiquitin-depe…	K17821|RNF165	http://www.genome.jp/dbget-bin/www_bget?ko:K17821	[O]	Posttranslational modification, protein turnover, chaperones	gi|1025287129|ref|XP_016373246.1|	1.7e-187	339/350(96.86)	661	PREDICTED: RING finger protein 165-like isoform X2 [Sinocyclocheilus rhinocerous]	XM_016517760.1	0	339/350(96.86)	565	PREDICTED: Sinocyclocheilus rhinocerous RING finger protein 165-like (LOC107712483), transcript variant X2, mRNA	sp|Q6ZSG1|RN165_HUMAN	1.2e-129	236/355(66.48)	464	RING finger protein 165 OS=Homo sapiens GN=RNF165 PE=1 SV=1
nonsynonymous SNV	CAFS_CC_T_00001554	10	GO:0005125: cytokine activity (molecular_function); GO:0005160: transforming growth factor beta receptor binding (molecular_function); GO:0005615: extracellular space (cellular_component); GO:0008083: growth factor activity (molecular_function); GO:0010862: positive regulation of pathway-restricted SMAD protein phosphorylation (biological_process); GO:0030509: BMP signaling pathway (biological_pr…	K05496|BMP3_3B	http://www.genome.jp/dbget-bin/www_bget?ko:K05496	[T]	Signal transduction mechanisms	gi|1025249855|ref|XP_016368881.1|	2.1e-191	342/400(85.50)	674	PREDICTED: growth/differentiation factor 10-like [Sinocyclocheilus rhinocerous]	XM_016513395.1	0	347/413(84.02)	701	PREDICTED: Sinocyclocheilus rhinocerous growth/differentiation factor 10-like (LOC107709001), mRNA	sp|Q08DX6|BMP3B_BOVIN	1.5e-93	194/413(46.97)	344	Bone morphogenetic protein 3B OS=Bos taurus GN=GDF10 PE=2 SV=1
nonsynonymous SNV	CAFS_CC_T_00154983	14	GO:0001756: somitogenesis (biological_process); GO:0001947: heart looping (biological_process); GO:0005515: protein binding (molecular_function); GO:0005576: extracellular region (cellular_component); GO:0009948: anterior/posterior axis specification (biological_process); GO:0010159: specification of animal organ position (biological_process); GO:0030514: negative regulation of BMP signaling path…	K04657|CHRD	http://www.genome.jp/dbget-bin/www_bget?ko:K04657	--	--	gi|587651831|dbj|BAO51897.1|	0	628/682(92.08)	1259	chordin B [Carassius auratus]	AB874475.1	0	629/682(92.23)	1258	Carassius auratus chdB mRNA for chordin B, complete cds	sp|O57472|CHRD_DANRE	0	557/693(80.38)	1102	Chordin OS=Danio rerio GN=chd PE=2 SV=1
nonsynonymous SNV	CAFS_CC_T_00176659	7	GO:0005783: endoplasmic reticulum (cellular_component); GO:0016021: integral component of membrane (cellular_component); GO:0030425: dendrite (cellular_component); GO:0043025: neuronal cell body (cellular_component); GO:0045666: positive regulation of neuron differentiation (biological_process); GO:0045930: negative regulation of mitotic cell cycle (biological_process); GO:0071300: cellular respo…	--	--	--	--	gi|1025280467|ref|XP_016377149.1|	0	727/766(94.91)	1445	PREDICTED: BMP/retinoic acid-inducible neural-specific protein 3-like [Sinocyclocheilus rhinocerous]	XM_016521663.1	0	729/766(95.17)	1493	PREDICTED: Sinocyclocheilus rhinocerous BMP/retinoic acid-inducible neural-specific protein 3-like (LOC107715511), mRNA	sp|Q499E0|FAM5C_MOUSE	4.3e-281	472/767(61.54)	968	Protein FAM5C OS=Mus musculus GN=Fam5c PE=2 SV=2
nonsynonymous SNV	CAFS_CC_T_00178602	12	GO:0005125: cytokine activity (molecular_function); GO:0005160: transforming growth factor beta receptor binding (molecular_function); GO:0005615: extracellular space (cellular_component); GO:0008083: growth factor activity (molecular_function); GO:0010862: positive regulation of pathway-restricted SMAD protein phosphorylation (biological_process); GO:0040007: growth (biological_process); GO:0042…	--	--	[T]	Signal transduction mechanisms	gi|1025084224|ref|XP_016340902.1|	1.8e-148	264/290(91.03)	531	PREDICTED: bone morphogenetic protein 2-like [Sinocyclocheilus anshuiensis]	XM_016485416.1	0	264/290(91.03)	518	PREDICTED: Sinocyclocheilus anshuiensis bone morphogenetic protein 2-like (LOC107687929), mRNA	sp|P12643|BMP2_HUMAN	4e-39	105/310(33.87)	163	Bone morphogenetic protein 2 OS=Homo sapiens GN=BMP2 PE=1 SV=1
nonsynonymous SNV	CAFS_CC_T_00201640	7	GO:0001756: somitogenesis (biological_process); GO:0001841: neural tube formation (biological_process); GO:0004872: receptor activity (molecular_function); GO:0005887: integral component of plasma membrane (cellular_component); GO:0007411: axon guidance (biological_process); GO:0030513: positive regulation of BMP signaling pathway (biological_process); GO:0055072: iron ion homeostasis (biological…	K06766|NEO1	http://www.genome.jp/dbget-bin/www_bget?ko:K06766	[T]	Signal transduction mechanisms	gi|1020495248|ref|XP_016086210.1|	0	1326/1408(94.18)	2491	PREDICTED: neogenin-like [Sinocyclocheilus grahami]	XM_016230724.1	0	1327/1414(93.85)	2504	PREDICTED: Sinocyclocheilus grahami neogenin-like (LOC107549579), mRNA	sp|P97798|NEO1_MOUSE	0	930/1451(64.09)	1694	Neogenin OS=Mus musculus GN=Neo1 PE=1 SV=1
nonsynonymous SNV	CAFS_CC_T_00224190	5	GO:0007155: cell adhesion (biological_process); GO:0015026: coreceptor activity (molecular_function); GO:0016021: integral component of membrane (cellular_component); GO:0030509: BMP signaling pathway (biological_process); GO:0046658: anchored component of plasma membrane (cellular_component);	K06847|RGM	http://www.genome.jp/dbget-bin/www_bget?ko:K06847	--	--	gi|966702627|gb|KTG34868.1|	6e-251	424/435(97.47)	872	hypothetical protein cypCar_00036291 [Cyprinus carpio]	XM_016238327.1	0	425/435(97.70)	853	PREDICTED: Sinocyclocheilus grahami RGM domain family member B-like (LOC107555502), mRNA	sp|Q6NW40|RGMB_HUMAN	1.5e-153	267/388(68.81)	543	RGM domain family member B OS=Homo sapiens GN=RGMB PE=2 SV=2

## Sheet: HH-BMP-deleterious exonic SNPs
Mutation type	#GeneID	GOTerms_num	GO_Anno	KEGG_entry	KEGG_url	KOG_class	KOG_class_annotation	NR_ID	E_value	Identity	Score	Annotation	NT_ID	E_value	Identity	Score	Annotation	Swissprot_ID	E_value	Identity	Score	Annotation
nonsynonymous SNV	CAFS_CC_T_00138281	24	GO:0000122: negative regulation of transcription from RNA polymerase II promoter (biological_process); GO:0000981: RNA polymerase II transcription factor activity, sequence-specific DNA binding (molecular_function); GO:0001568: blood vessel development (biological_process); GO:0001706: endoderm formation (biological_process); GO:0001947: heart looping (biological_process); GO:0005634: nucleus (ce…	K09400|FOXH	http://www.genome.jp/dbget-bin/www_bget?ko:K09400	[K]	Transcription	gi|966670447|gb|KTG03828.1|	2.3e-280	467/470(99.36)	970	hypothetical protein cypCar_00011879 [Cyprinus carpio]	XM_016522921.1	0	438/471(92.99)	785	PREDICTED: Sinocyclocheilus rhinocerous forkhead box protein H1-like (LOC107716461), transcript variant X2, mRNA	sp|Q9I9E1|FOXH1_DANRE	3.8e-251	421/472(89.19)	868	Forkhead box protein H1 OS=Danio rerio GN=foxh1 PE=1 SV=1
nonsynonymous SNV	CAFS_CC_T_00046720	26	GO:0000122: negative regulation of transcription from RNA polymerase II promoter (biological_process); GO:0001947: heart looping (biological_process); GO:0003303: BMP signaling pathway involved in heart jogging (biological_process); GO:0003342: proepicardium development (biological_process); GO:0005125: cytokine activity (molecular_function); GO:0005160: transforming growth factor beta receptor b…	K04662|BMP2_4	http://www.genome.jp/dbget-bin/www_bget?ko:K04662	[T]	Signal transduction mechanisms	gi|966712746|gb|KTG44984.1|	2.2e-231	394/400(98.50)	807	hypothetical protein cypCar_00018995 [Cyprinus carpio]	XM_016531842.1	0	390/400(97.50)	782	PREDICTED: Sinocyclocheilus rhinocerous bone morphogenetic protein 4-like (LOC107723271), mRNA	sp|P12644|BMP4_HUMAN	4.9e-167	296/415(71.33)	588	Bone morphogenetic protein 4 OS=Homo sapiens GN=BMP4 PE=1 SV=1
nonsynonymous SNV	CAFS_CC_T_00044625	5	GO:0015026: coreceptor activity (molecular_function); GO:0016021: integral component of membrane (cellular_component); GO:0030509: BMP signaling pathway (biological_process); GO:0046658: anchored component of plasma membrane (cellular_component); GO:0048681: negative regulation of axon regeneration (biological_process);	K06847|RGM	http://www.genome.jp/dbget-bin/www_bget?ko:K06847	--	--	gi|1025279104|ref|XP_016376781.1|	4.3e-236	410/430(95.35)	823	PREDICTED: repulsive guidance molecule A-like [Sinocyclocheilus rhinocerous]	XM_016521295.1	0	414/432(95.83)	833	PREDICTED: Sinocyclocheilus rhinocerous repulsive guidance molecule A-like (LOC107715216), mRNA	sp|Q8JG54|RGMA_CHICK	6.4e-168	288/400(72.00)	591	Repulsive guidance molecule A OS=Gallus gallus GN=RGMA PE=1 SV=1
nonsynonymous SNV	CAFS_CC_T_00125523	5	GO:0005509: calcium ion binding (molecular_function); GO:0005576: extracellular region (cellular_component); GO:0009953: dorsal/ventral pattern formation (biological_process); GO:0030510: regulation of BMP signaling pathway (biological_process); GO:0060034: notochord cell differentiation (biological_process);	--	--	--	--	gi|966673007|gb|KTG06388.1|	2.2e-176	292/298(97.99)	624	hypothetical protein cypCar_00005360, partial [Cyprinus carpio]	XM_016251993.1	0	309/332(93.07)	646	PREDICTED: Sinocyclocheilus grahami follistatin-related protein 1-like (LOC107566530), mRNA	sp|Q58D84|FSTL1_BOVIN	1.1e-127	216/316(68.35)	457	Follistatin-related protein 1 OS=Bos taurus GN=FSTL1 PE=2 SV=1
nonsynonymous SNV	CAFS_CC_T_00146325	7	GO:0001755: neural crest cell migration (biological_process); GO:0010470: regulation of gastrulation (biological_process); GO:0021755: eurydendroid cell differentiation (biological_process); GO:0021778: oligodendrocyte cell fate specification (biological_process); GO:0048701: embryonic cranial skeleton morphogenesis (biological_process); GO:0060027: convergent extension involved in gastrulation (…	K16534|DISC1	http://www.genome.jp/dbget-bin/www_bget?ko:K16534	--	--	gi|1024933924|ref|XP_016314127.1|	2.7e-238	475/646(73.53)	830	PREDICTED: disrupted in schizophrenia 1 protein-like isoform X1 [Sinocyclocheilus anshuiensis]	XM_016249249.1	0	476/646(73.68)	792	PREDICTED: Sinocyclocheilus grahami disrupted in schizophrenia 1 protein-like (LOC107564234), mRNA	sp|Q9NRI5|DISC1_HUMAN	7.4e-63	206/634(32.49)	243	Disrupted in schizophrenia 1 protein OS=Homo sapiens GN=DISC1 PE=1 SV=3
nonsynonymous SNV	CAFS_CC_T_00233027	5	GO:0003230: cardiac atrium development (biological_process); GO:0005125: cytokine activity (molecular_function); GO:0005615: extracellular space (cellular_component); GO:0060536: cartilage morphogenesis (biological_process); GO:0061312: BMP signaling pathway involved in heart development (biological_process);	--	--	--	--	gi|966648513|gb|KTF83423.1|	9.8e-91	165/166(99.40)	339	hypothetical protein cypCar_00042532 [Cyprinus carpio]	XM_016468376.1	1e-101	155/166(93.37)	302	PREDICTED: Sinocyclocheilus anshuiensis gremlin-2-like (LOC107674410), transcript variant X2, mRNA	sp|Q9H772|GREM2_HUMAN	7.2e-62	117/168(69.64)	238	Gremlin-2 OS=Homo sapiens GN=GREM2 PE=1 SV=1
nonsynonymous SNV	CAFS_CC_T_00201640	7	GO:0001756: somitogenesis (biological_process); GO:0001841: neural tube formation (biological_process); GO:0004872: receptor activity (molecular_function); GO:0005887: integral component of plasma membrane (cellular_component); GO:0007411: axon guidance (biological_process); GO:0030513: positive regulation of BMP signaling pathway (biological_process); GO:0055072: iron ion homeostasis (biological…	K06766|NEO1	http://www.genome.jp/dbget-bin/www_bget?ko:K06766	[T]	Signal transduction mechanisms	gi|1020495248|ref|XP_016086210.1|	0	1326/1408(94.18)	2491	PREDICTED: neogenin-like [Sinocyclocheilus grahami]	XM_016230724.1	0	1327/1414(93.85)	2504	PREDICTED: Sinocyclocheilus grahami neogenin-like (LOC107549579), mRNA	sp|P97798|NEO1_MOUSE	0	930/1451(64.09)	1694	Neogenin OS=Mus musculus GN=Neo1 PE=1 SV=1
nonsynonymous SNV	CAFS_CC_T_00226647	11	GO:0005125: cytokine activity (molecular_function); GO:0005160: transforming growth factor beta receptor binding (molecular_function); GO:0005615: extracellular space (cellular_component); GO:0008083: growth factor activity (molecular_function); GO:0010862: positive regulation of pathway-restricted SMAD protein phosphorylation (biological_process); GO:0030509: BMP signaling pathway (biological_pr…	K04664|GDF5_6_7	http://www.genome.jp/dbget-bin/www_bget?ko:K04664	[T]	Signal transduction mechanisms	gi|966669054|gb|KTG02435.1|	4.5e-247	437/495(88.28)	859	hypothetical protein cypCar_00018693 [Cyprinus carpio]	XM_016532635.1	0	443/495(89.49)	868	PREDICTED: Sinocyclocheilus rhinocerous growth/differentiation factor 5-like (LOC107723909), mRNA	sp|P43026|GDF5_HUMAN	1.5e-130	232/334(69.46)	467	Growth/differentiation factor 5 OS=Homo sapiens GN=GDF5 PE=1 SV=3
nonsynonymous SNV	CAFS_CC_T_00028020	7	GO:0001755: neural crest cell migration (biological_process); GO:0010470: regulation of gastrulation (biological_process); GO:0021755: eurydendroid cell differentiation (biological_process); GO:0021778: oligodendrocyte cell fate specification (biological_process); GO:0048701: embryonic cranial skeleton morphogenesis (biological_process); GO:0060027: convergent extension involved in gastrulation (…	K16534|DISC1	http://www.genome.jp/dbget-bin/www_bget?ko:K16534	--	--	gi|1024933927|ref|XP_016314136.1|	0	677/756(89.55)	1239	PREDICTED: disrupted in schizophrenia 1 protein-like isoform X2 [Sinocyclocheilus anshuiensis]	XM_016458650.1	0	677/756(89.55)	1127	PREDICTED: Sinocyclocheilus anshuiensis disrupted in schizophrenia 1 protein-like (LOC107667056), transcript variant X2, mRNA	sp|Q9NRI5|DISC1_HUMAN	9.1e-66	191/543(35.17)	253	Disrupted in schizophrenia 1 protein OS=Homo sapiens GN=DISC1 PE=1 SV=3
nonsynonymous SNV	CAFS_CC_T_00246522	30	GO:0001558: regulation of cell growth (biological_process); GO:0001935: endothelial cell proliferation (biological_process); GO:0001945: lymph vessel development (biological_process); GO:0001947: heart looping (biological_process); GO:0002040: sprouting angiogenesis (biological_process); GO:0003146: heart jogging (biological_process); GO:0004702: signal transducer, downstream of receptor, with se…	K04671|BMPR2	http://www.genome.jp/dbget-bin/www_bget?ko:K04671	[T]	Signal transduction mechanisms	gi|1025043414|ref|XP_016328292.1|	0	992/1043(95.11)	1848	PREDICTED: bone morphogenetic protein receptor type-2 [Sinocyclocheilus anshuiensis]	XM_016472806.1	0	1015/1042(97.41)	1697	PREDICTED: Sinocyclocheilus anshuiensis bone morphogenetic protein receptor type 2 (bmpr2), mRNA	sp|O35607|BMPR2_MOUSE	0	693/1076(64.41)	1201	Bone morphogenetic protein receptor type-2 OS=Mus musculus GN=Bmpr2 PE=2 SV=1

## Sheet: WQ-BMP-deleterious exonic SNPs
Mutation type	#GeneID	GOTerms_num	GO_Anno	KEGG_entry	KEGG_url	KOG_class	KOG_class_annotation	NR_ID	E_value	Identity	Score	Annotation	NT_ID	E_value	Identity	Score	Annotation	Swissprot_ID	E_value	Identity	Score	Annotation
nonsynonymous SNV	CAFS_CC_T_00015951	20	GO:0001947: heart looping (biological_process); GO:0003303: BMP signaling pathway involved in heart jogging (biological_process); GO:0005125: cytokine activity (molecular_function); GO:0005160: transforming growth factor beta receptor binding (molecular_function); GO:0005615: extracellular space (cellular_component); GO:0006461: protein complex assembly (biological_process); GO:0008083: growth fa…	K16621|BMP7	http://www.genome.jp/dbget-bin/www_bget?ko:K16621	[T]	Signal transduction mechanisms	gi|1025185266|ref|XP_016422085.1|	2.5e-233	399/428(93.22)	813	PREDICTED: bone morphogenetic protein 7-like [Sinocyclocheilus rhinocerous]	XM_016566599.1	0	399/428(93.22)	801	PREDICTED: Sinocyclocheilus rhinocerous bone morphogenetic protein 7-like (LOC107751030), mRNA	sp|P23359|BMP7_MOUSE	1.5e-161	279/414(67.39)	570	Bone morphogenetic protein 7 OS=Mus musculus GN=Bmp7 PE=1 SV=2
nonsynonymous SNV	CAFS_CC_T_00138281	24	GO:0000122: negative regulation of transcription from RNA polymerase II promoter (biological_process); GO:0000981: RNA polymerase II transcription factor activity, sequence-specific DNA binding (molecular_function); GO:0001568: blood vessel development (biological_process); GO:0001706: endoderm formation (biological_process); GO:0001947: heart looping (biological_process); GO:0005634: nucleus (ce…	K09400|FOXH	http://www.genome.jp/dbget-bin/www_bget?ko:K09400	[K]	Transcription	gi|966670447|gb|KTG03828.1|	2.3e-280	467/470(99.36)	970	hypothetical protein cypCar_00011879 [Cyprinus carpio]	XM_016522921.1	0	438/471(92.99)	785	PREDICTED: Sinocyclocheilus rhinocerous forkhead box protein H1-like (LOC107716461), transcript variant X2, mRNA	sp|Q9I9E1|FOXH1_DANRE	3.8e-251	421/472(89.19)	868	Forkhead box protein H1 OS=Danio rerio GN=foxh1 PE=1 SV=1
nonsynonymous SNV	CAFS_CC_T_00038866	12	GO:0000975: regulatory region DNA binding (molecular_function); GO:0001889: liver development (biological_process); GO:0001947: heart looping (biological_process); GO:0004871: signal transducer activity (molecular_function); GO:0016020: membrane (cellular_component); GO:0030513: positive regulation of BMP signaling pathway (biological_process); GO:0031016: pancreas development (biological_process…	--	--	[K]	Transcription	gi|1025356457|ref|XP_016390600.1|	0	2625/2938(89.35)	4664	PREDICTED: MAX gene-associated protein-like [Sinocyclocheilus rhinocerous]	XM_016535132.1	0	2678/2938(91.15)	4476	PREDICTED: Sinocyclocheilus rhinocerous MAX gene-associated protein-like (LOC107725733), transcript variant X3, mRNA	sp|Q8IWI9|MGAP_HUMAN	2.9e-131	613/2277(26.92)	472	MAX gene-associated protein OS=Homo sapiens GN=MGA PE=1 SV=2
nonsynonymous SNV	CAFS_CC_T_00041831	49	GO:0001666: response to hypoxia (biological_process); GO:0003143: embryonic heart tube morphogenesis (biological_process); GO:0003220: left ventricular cardiac muscle tissue morphogenesis (biological_process); GO:0003300: cardiac muscle hypertrophy (biological_process); GO:0005219: ryanodine-sensitive calcium-release channel activity (molecular_function); GO:0005509: calcium ion binding (molecula…	K04962|RYR2	http://www.genome.jp/dbget-bin/www_bget?ko:K04962	[T]	Signal transduction mechanisms	gi|1020413300|ref|XP_016125404.1|	5.4e-136	285/462(61.69)	490	PREDICTED: LOW QUALITY PROTEIN: ryanodine receptor 2-like [Sinocyclocheilus grahami]	LN590671.1	8e-176	164/165(99.39)	346	Cyprinus carpio genome assembly common carp genome, scaffold: LG49, chromosome: 49	sp|P30957|RYR2_RABIT	4.9e-81	155/212(73.11)	302	Ryanodine receptor 2 OS=Oryctolagus cuniculus GN=RYR2 PE=1 SV=3
nonsynonymous SNV	CAFS_CC_T_00053975	7	GO:0005783: endoplasmic reticulum (cellular_component); GO:0016021: integral component of membrane (cellular_component); GO:0030425: dendrite (cellular_component); GO:0043025: neuronal cell body (cellular_component); GO:0045666: positive regulation of neuron differentiation (biological_process); GO:0045930: negative regulation of mitotic cell cycle (biological_process); GO:0071300: cellular respo…	--	--	--	--	gi|1025176313|ref|XP_016358812.1|	0	702/738(95.12)	1412	PREDICTED: BMP/retinoic acid-inducible neural-specific protein 3-like [Sinocyclocheilus anshuiensis]	XM_016503326.1	0	703/738(95.26)	1473	PREDICTED: Sinocyclocheilus anshuiensis BMP/retinoic acid-inducible neural-specific protein 3-like (LOC107701336), mRNA	sp|Q499E0|FAM5C_MOUSE	4.6e-288	477/737(64.72)	991	Protein FAM5C OS=Mus musculus GN=Fam5c PE=2 SV=2
nonsynonymous SNV	CAFS_CC_T_00092367	15	GO:0005388: calcium-transporting ATPase activity (molecular_function); GO:0005524: ATP binding (molecular_function); GO:0005887: integral component of plasma membrane (cellular_component); GO:0006874: cellular calcium ion homeostasis (biological_process); GO:0007605: sensory perception of sound (biological_process); GO:0030165: PDZ domain binding (molecular_function); GO:0030282: bone mineralizat…	K05850|ATP2B	http://www.genome.jp/dbget-bin/www_bget?ko:K05850	[P]	Inorganic ion transport and metabolism	gi|1020392977|ref|XP_016127769.1|	0	1205/1266(95.18)	2201	PREDICTED: plasma membrane calcium-transporting ATPase 1 isoform X1 [Sinocyclocheilus grahami]	XM_016489115.1	0	1207/1266(95.34)	2277	PREDICTED: Sinocyclocheilus anshuiensis plasma membrane calcium-transporting ATPase 1-like (LOC107690705), mRNA	sp|P20020|AT2B1_HUMAN	0	1054/1270(82.99)	1968	Plasma membrane calcium-transporting ATPase 1 OS=Homo sapiens GN=ATP2B1 PE=1 SV=3
nonsynonymous SNV	CAFS_CC_T_00160768	12	GO:0000975: regulatory region DNA binding (molecular_function); GO:0001889: liver development (biological_process); GO:0001947: heart looping (biological_process); GO:0004871: signal transducer activity (molecular_function); GO:0016020: membrane (cellular_component); GO:0030513: positive regulation of BMP signaling pathway (biological_process); GO:0031016: pancreas development (biological_process…	--	--	[K]	Transcription	gi|1025110077|ref|XP_016347959.1|	0	2584/2914(88.68)	4505	PREDICTED: MAX gene-associated protein-like isoform X1 [Sinocyclocheilus anshuiensis]	XM_016492473.1	0	2675/2914(91.80)	4531	PREDICTED: Sinocyclocheilus anshuiensis MAX gene-associated protein-like (LOC107693180), transcript variant X1, mRNA	sp|A2AWL7|MGAP_MOUSE	1.6e-142	541/1788(30.26)	510	MAX gene-associated protein OS=Mus musculus GN=Mga PE=2 SV=1
nonsynonymous SNV	CAFS_CC_T_00233027	5	GO:0003230: cardiac atrium development (biological_process); GO:0005125: cytokine activity (molecular_function); GO:0005615: extracellular space (cellular_component); GO:0060536: cartilage morphogenesis (biological_process); GO:0061312: BMP signaling pathway involved in heart development (biological_process);	--	--	--	--	gi|966648513|gb|KTF83423.1|	9.8e-91	165/166(99.40)	339	hypothetical protein cypCar_00042532 [Cyprinus carpio]	XM_016468376.1	1e-101	155/166(93.37)	302	PREDICTED: Sinocyclocheilus anshuiensis gremlin-2-like (LOC107674410), transcript variant X2, mRNA	sp|Q9H772|GREM2_HUMAN	7.2e-62	117/168(69.64)	238	Gremlin-2 OS=Homo sapiens GN=GREM2 PE=1 SV=1
nonsynonymous SNV	CAFS_CC_T_00200704	15	GO:0000122: negative regulation of transcription from RNA polymerase II promoter (biological_process); GO:0000978: RNA polymerase II core promoter proximal region sequence-specific DNA binding (molecular_function); GO:0001078: transcriptional repressor activity, RNA polymerase II core promoter proximal region sequence-specific binding (molecular_function); GO:0003682: chromatin binding (molecular…	--	--	--	--	gi|1025335728|ref|XP_016390746.1|	3e-275	581/645(90.08)	953	PREDICTED: ski-like protein [Sinocyclocheilus rhinocerous]	XM_016535260.1	0	578/645(89.61)	1041	PREDICTED: Sinocyclocheilus rhinocerous ski-like protein (LOC107725859), mRNA	sp|P12757|SKIL_HUMAN	9.6e-93	193/396(48.74)	342	Ski-like protein OS=Homo sapiens GN=SKIL PE=1 SV=1
nonsynonymous SNV	CAFS_CC_T_00201640	7	GO:0001756: somitogenesis (biological_process); GO:0001841: neural tube formation (biological_process); GO:0004872: receptor activity (molecular_function); GO:0005887: integral component of plasma membrane (cellular_component); GO:0007411: axon guidance (biological_process); GO:0030513: positive regulation of BMP signaling pathway (biological_process); GO:0055072: iron ion homeostasis (biological…	K06766|NEO1	http://www.genome.jp/dbget-bin/www_bget?ko:K06766	[T]	Signal transduction mechanisms	gi|1020495248|ref|XP_016086210.1|	0	1326/1408(94.18)	2491	PREDICTED: neogenin-like [Sinocyclocheilus grahami]	XM_016230724.1	0	1327/1414(93.85)	2504	PREDICTED: Sinocyclocheilus grahami neogenin-like (LOC107549579), mRNA	sp|P97798|NEO1_MOUSE	0	930/1451(64.09)	1694	Neogenin OS=Mus musculus GN=Neo1 PE=1 SV=1
nonsynonymous SNV	CAFS_CC_T_00025126	4	GO:0001649: osteoblast differentiation (biological_process); GO:0005125: cytokine activity (molecular_function); GO:0005615: extracellular space (cellular_component); GO:0008083: growth factor activity (molecular_function);	K05496|BMP3_3B	http://www.genome.jp/dbget-bin/www_bget?ko:K05496	[T]	Signal transduction mechanisms	gi|966672406|gb|KTG05787.1|	1.4e-230	391/393(99.49)	804	hypothetical protein cypCar_00037085 [Cyprinus carpio]	XM_016512468.1	0	376/395(95.19)	752	PREDICTED: Sinocyclocheilus rhinocerous growth/differentiation factor 10-like (LOC107708281), mRNA	sp|P55108|BMP3B_RAT	2.6e-123	232/405(57.28)	443	Bone morphogenetic protein 3B OS=Rattus norvegicus GN=Gdf10 PE=2 SV=1
nonsynonymous SNV	CAFS_CC_T_00223369	4	GO:0001525: angiogenesis (biological_process); GO:0006898: receptor-mediated endocytosis (biological_process); GO:0007219: Notch signaling pathway (biological_process); GO:0030510: regulation of BMP signaling pathway (biological_process);	K12475|DAB2	http://www.genome.jp/dbget-bin/www_bget?ko:K12475	[T]	Signal transduction mechanisms	gi|1025323671|ref|XP_016387423.1|	0	703/804(87.44)	1244	PREDICTED: disabled homolog 2-like isoform X1 [Sinocyclocheilus rhinocerous]	XM_016531939.1	0	700/768(91.15)	1186	PREDICTED: Sinocyclocheilus rhinocerous disabled homolog 2-like (LOC107723357), transcript variant X2, mRNA	sp|P98082|DAB2_HUMAN	4.2e-122	333/818(40.71)	440	Disabled homolog 2 OS=Homo sapiens GN=DAB2 PE=1 SV=3
nonsynonymous SNV	CAFS_CC_T_00028020	7	GO:0001755: neural crest cell migration (biological_process); GO:0010470: regulation of gastrulation (biological_process); GO:0021755: eurydendroid cell differentiation (biological_process); GO:0021778: oligodendrocyte cell fate specification (biological_process); GO:0048701: embryonic cranial skeleton morphogenesis (biological_process); GO:0060027: convergent extension involved in gastrulation (…	K16534|DISC1	http://www.genome.jp/dbget-bin/www_bget?ko:K16534	--	--	gi|1024933927|ref|XP_016314136.1|	0	677/756(89.55)	1239	PREDICTED: disrupted in schizophrenia 1 protein-like isoform X2 [Sinocyclocheilus anshuiensis]	XM_016458650.1	0	677/756(89.55)	1127	PREDICTED: Sinocyclocheilus anshuiensis disrupted in schizophrenia 1 protein-like (LOC107667056), transcript variant X2, mRNA	sp|Q9NRI5|DISC1_HUMAN	9.1e-66	191/543(35.17)	253	Disrupted in schizophrenia 1 protein OS=Homo sapiens GN=DISC1 PE=1 SV=3
